# Supplementary material
Source: publisher figshare collection journal article supplement (https://sage.figshare.com/ndownloader/files/20179172)
Supplement: Supplementary file 1 [file 20179172]

## Sheet: DATA_forPartek_project1160_DE71
Gene Ontology Analyses
GO Category: BP
GO File Creation Date: 09/17/18
Deduplicate Gene Sets: false
Data Source: DATA_forPartek_project1160_DE71_forBMDExpress_AffyRMA.071218.dat
Work Source: DATA_forPartek_project1160_DE71_forBMDExpress_AffyRMA.071218.dat_oneway_0.05_NOMTC_foldfilter1.5_BMD
BMDExpress2 Version: BMDExpress 2.20.0180 BETA
Timestamp (Start Time): 01/03/2019 17:04.33
Remove Promiscuous Probes: true
Remove BMD > Highest Dose from Category Descriptive Statistics: true
Identify conflicting probe sets: 0.5
Category Count: 3759
Total Run Time: 2 seconds
GO/Pathway/Gene Set ID	GO Level	GO/Pathway/Gene Set Name	All Genes (Expression Data)	All Genes (Platform)	Input Genes	Genes with BMD <= Highest Dose	Genes That Passed All Filters	Fisher's Exact Left P-Value	Fisher's Exact Right P-Value	Fisher's Exact Two Tail	Percentage	Entrez Gene IDs	Gene Symbols	Probe IDs	Genes with Conflicting Probesets	BMD Mean	BMD Median	BMD Minimum	BMD Standard Deviation	BMD wMean	BMD wSD	BMDL Mean	BMDL Median	BMDL Minimum	BMDL Standard Deviation	BMDL wMean	BMDL wSD	BMDU Mean	BMDU Median	BMDU Minimum	BMDU Standard Deviation	BMDU wMean	BMDU wSD	5th Percentile Index	BMD at 5th Percentile of Total Genes	10th Percentile Index	BMD at 10th Percentile of Total Genes	BMD List	BMDL List	BMDU List	Probes with Adverse Direction Up	Probes with Adverse Direction Down	Genes with Adverse Direction Up	Genes Up List	Genes Up Probes List	Genes Up BMD Mean	Genes Up BMD Median	Genes Up SD	Genes Up BMDL Mean
GO:0000002	6	mitochondrial genome maintenance	7	7	1	1	1	0.99366	0.11902	0.11902	14.29	309957	Mef2a	1378360_at		33.9069	33.9069	33.9069		33.9069		21.8155	21.8155	21.8155		21.8155		72.9728	72.9728	72.9728		72.9728		0	33.9069	0	33.9069	33.9069	21.8155	72.9728	0	1	0
GO:0000003	2	reproduction	14	14	1	1	1	0.97471	0.22393	0.22393	7.14	24536	Lepr	1370604_at,1370605_s_at,1371223_a_at,1388232_a_at	24536(-0.2274)	14.379	14.379	14.379		14.379		5.4455	5.4455	5.4455		5.4455		6.37502e+06	6.37502e+06	6.37502e+06		6.37502e+06		0	14.379			14.379	5.4455	6.37502e+06	0	4	0
GO:0000038	7	very long-chain fatty acid metabolic process	24	27	2	2	2	0.98787	0.083888	0.083888	7.41	171402;171400	Elovl6;Elovl5	1388108_at;1387630_at		22.4582	22.4582	9.61605	18.1616	27.2633	16.8424	12.8552	12.8552	2.85924	14.1365	16.5953	13.1096	52.2715	52.2715	27.9604	34.3811	61.3678	31.8838	0.5	22.4582			9.61605;35.3004	2.85924;22.8512	27.9604;76.5826	2	0	2	171402;171400	1388108_at;1387630_at	22.4582	22.4582	18.1616	12.8552
GO:0000041	8	transition metal ion transport	67	74	4	4	4	0.9895	0.043799	0.043799	5.41	302864;29199;170824;25303	Mmgt1;Hfe;Steap3;Abcc2	1376168_at,1395325_s_at;1370772_a_at;1370374_at;1368497_at		21.7911	24.9374	2.0728	15.5095	25.9662	14.7837	14.1612	16.8885	0.0564991	10.4745	16.7197	9.98991	46.6238	47.7518	14.7535	31.017	56.3267	28.8617	2.5	34.151			2.072798;35.2166;33.0854;16.7895	0.0564991;22.8112;21.3888;12.3882	14.753499999999999;76.2381;70.0105;25.4932	4	1	3	302864;29199;25303	1376168_at,1395325_s_at;1370772_a_at;1368497_at	18.0263	16.7895	16.6065	11.752
GO:0000075	6	cell cycle checkpoint	110	116	2	2	2	0.65462	0.61917	1	1.72	287603;58919	Tex14;Ccnd1	1382487_at;1371150_at,1371643_at,1383075_at		10.2105	10.2105	4.86357	7.56173	4.86315		5.83206	5.83206	0.107723	8.09544	0.10727		250012	250012	23.2821	353537	500020						4.86357;15.557466666666665	0.107723;11.556399999999998	500000.0;23.282066666666665	0	4	0
GO:0000077	8	DNA damage checkpoint	59	62	1	1	1	0.69418	0.6753	1	1.61	58919	Ccnd1	1371150_at,1371643_at,1383075_at		15.5575	15.5575	15.5575		15.5575		11.5564	11.5564	11.5564		11.5564		23.2821	23.2821	23.2821		23.2821						15.5575	11.5564	23.2821	0	3	0
GO:0000079	8	regulation of cyclin-dependent protein serine/threonine kinase activity	68	70	1	1	1	0.64161	0.71928	1	1.43	58919	Ccnd1	1371150_at,1371643_at,1383075_at		15.5575	15.5575	15.5575		15.5575		11.5564	11.5564	11.5564		11.5564		23.2821	23.2821	23.2821		23.2821						15.5575	11.5564	23.2821	0	3	0
GO:0000082	6	G1/S transition of mitotic cell cycle	47	53	2	2	2	0.93061	0.24585	0.24585	3.77	58919;29200	Ccnd1;Inhba	1371150_at,1371643_at,1383075_at;1369012_at,1383486_at		26.9988	26.9988	15.5575	16.1805	20.3847	13.2029	17.834	17.834	11.5564	8.87783	14.205	7.24409	38.3155	38.3155	23.2821	21.2605	29.6249	17.348					15.557466666666665;38.44015	11.556399999999998;24.11155	23.282066666666665;53.34895	0	5	0
GO:0000086	6	G2/M transition of mitotic cell cycle	35	38	2	2	2	0.9697	0.14823	0.14823	5.26	60336;170913	Arpp19;Abcb1a	1394318_at;1370464_at,1370465_at		14.93	14.93	2.46199	17.6325	12.935	17.4053	9.59155	9.59155	0.077203	13.4553	8.06916	13.282	29.24	29.24	10.0651	27.1174	26.1718	26.768	0.5	14.93			27.3981;2.461988	19.1059;0.077203	48.4149;10.065059999999999	3	0	2	60336;170913	1394318_at;1370464_at,1370465_at	14.93	14.93	17.6325	9.59155
GO:0000122	9	negative regulation of transcription by RNA polymerase II	699	728	8	8	8	0.088637	0.95373	0.19284	1.1	685691;360481;309957;305888;94268;58919;117514;25690	Eid2;Dnaja3;Mef2a;Zfhx2;Efna1;Ccnd1;Txnip;Ahr	1393058_at;1378392_at;1378360_at;1390368_at;1372844_at;1371150_at,1371643_at,1383075_at;1371131_a_at;1369146_a_at	305888(-0.1592)	19.964	25.0115	0.056018	13.3063	17.7329	13.9816	13.6003	17.5757	2.77822e-07	8.92186	12.0772	9.50775	6.25004e+06	57.0943	23.2821	1.15727e+07	8.32746e+06	1.25966e+07					25.2334;31.2133;33.9069;0.056018;24.7896;15.557466666666665;28.4676;0.487373	17.5909;20.8292;21.8155;2.77822E-7;17.5606;11.556399999999998;19.3855;0.0641274	43.9106;61.4029;72.9728;2.5E7;41.8713;23.282066666666665;52.7858;2.5E7	4	6	4	685691;360481;94268;25690	1393058_at;1378392_at;1372844_at;1369146_a_at	20.4309	25.0115	13.6145	14.0112
GO:0000165	8	MAPK cascade	133	141	2	2	2	0.53446	0.72309	1	1.42	309957;25476	Mef2a;Lgals9	1378360_at;1387027_a_at		35.2317	35.2317	33.9069	1.87355	35.3572	1.86513	22.6297	22.6297	21.8155	1.15145	22.7068	1.14628	77.4578	77.4578	72.9728	6.34282	77.8827	6.3143					33.9069;36.5565	21.8155;23.4439	72.9728;81.9429	1	1	1	25476	1387027_a_at	36.5565	36.5565		23.4439
GO:0000185	10	activation of MAPKKK activity	17	17	1	1	1	0.96351	0.26499	0.26499	5.88	299626	Gadd45b	1372016_at		25.2726	25.2726	25.2726		25.2726		18.0945	18.0945	18.0945		18.0945		42.0506	42.0506	42.0506		42.0506		0	25.2726			25.2726	18.0945	42.0506	1	0	1	299626	1372016_at	25.2726	25.2726		18.0945
GO:0000186	10	activation of MAPKK activity	36	39	1	1	1	0.8455	0.50684	0.50684	2.56	299626	Gadd45b	1372016_at		25.2726	25.2726	25.2726		25.2726		18.0945	18.0945	18.0945		18.0945		42.0506	42.0506	42.0506		42.0506						25.2726	18.0945	42.0506	1	0	1	299626	1372016_at	25.2726	25.2726		18.0945
GO:0000209	10	protein polyubiquitination	143	155	2	2	2	0.4714	0.77014	1	1.29	294079;298652	March5;Ube4b	1385790_at;1374507_at,1376862_at		29.6711	29.6711	21.3806	11.7245	28.442	11.595	19.7548	19.7548	15.4179	6.1332	19.1118	6.06542	61.3918	61.3918	34.3804	38.2	57.3874	37.7778					37.9616;21.3806	24.0916;15.41795	88.4033;34.380399999999995	3	0	2	294079;298652	1385790_at;1374507_at,1376862_at	29.6711	29.6711	11.7245	19.7548
GO:0000226	5	microtubule cytoskeleton organization	307	322	1	1	1	0.019211	0.99727	0.032666	0.31	316313	Dst	1395274_at	316313(-0.1821)	36.1342	36.1342	36.1342		36.1342		23.7496	23.7496	23.7496		23.7496		77.396	77.396	77.396		77.396						36.1342	23.7496	77.396	1	0	1	316313	1395274_at	36.1342	36.1342		23.7496
GO:0000272	6	polysaccharide catabolic process	11	12	2	2	2	0.99889	0.018779	0.018779	16.67	305234;310864	Stbd1;Manba	1372602_at;1371875_at		13.2777	13.2777	6.36817	9.77153	11.5177	9.44922	7.41522	7.41522	0.255943	10.1247	5.59163	9.79079	25.5221	25.5221	18.8269	9.46844	23.8167	9.15613	0	6.36817	0.5	13.2777	6.36817;20.1872	0.255943;14.5745	18.8269;32.2173	2	0	2	305234;310864	1372602_at;1371875_at	13.2777	13.2777	9.77153	7.41522
GO:0000278	4	mitotic cell cycle	108	118	3	3	3	0.83787	0.3552	0.4722	2.54	297783;60336;58919	Mybl1;Arpp19;Ccnd1	1385132_at;1394318_at;1371150_at,1371643_at,1383075_at		24.4517	27.3981	15.5575	7.84741	24.3069	7.78354	17.0236	19.1059	11.5564	4.77936	16.952	4.75538	43.4762	48.4149	23.2821	18.2335	43.0357	17.992					30.3994;27.3981;15.557466666666665	20.4086;19.1059;11.556399999999998	58.7317;48.4149;23.282066666666665	2	3	2	297783;60336	1385132_at;1394318_at	28.8987	28.8987	2.12224	19.7572
GO:0000280	6	nuclear division	40	43	2	2	2	0.95844	0.18	0.18	4.65	297783;287603	Mybl1;Tex14	1385132_at;1382487_at		17.6315	17.6315	4.86357	18.0566	4.86267		10.2582	10.2582	0.107723	14.3549	0.10701		250029	250029	58.7317	353512	500018						30.3994;4.86357	20.4086;0.107723	58.7317;500000.0	1	1	1	297783	1385132_at	30.3994	30.3994		20.4086
GO:0000302	5	response to reactive oxygen species	218	226	8	8	8	0.97918	0.051121	0.067248	3.54	25419;24314;170496;361659;117514;246097;25426;83619	Crp;Nqo1;Lcn2;Plekha1;Txnip;Fas;Cyp1b1;Nfe2l2	1387830_at;1387599_a_at;1387011_at;1376762_at;1371131_a_at;1397221_s_at;1368990_at;1367826_at		19.4816	21.694	0.0158072	12.9228	23.2164	10.0723	12.4924	15.3912	6.31202e-05	9.3731	15.3789	7.5513	62539	44.4706	22.2679	176761	24023.5	114205					20.2265;8.72415;39.4681;23.1615;28.4676;0.0158072;27.2489;8.54018	14.599;3.19261;25.4163;16.1835;19.3855;6.31202E-5;18.7215;2.44081	32.2998;22.2679;92.3515;39.6472;52.7858;500000.0;49.2941;23.1149	6	2	6	25419;24314;170496;246097;25426;83619	1387830_at;1387599_a_at;1387011_at;1397221_s_at;1368990_at;1367826_at	17.3706	14.4753	14.4773	10.7284
GO:0000320	4	re-entry into mitotic cell cycle	4	4	1	1	1	0.99812	0.069844	0.069844	25	58919	Ccnd1	1371150_at,1371643_at,1383075_at		15.5575	15.5575	15.5575		15.5575		11.5564	11.5564	11.5564		11.5564		23.2821	23.2821	23.2821		23.2821		0	15.5575	0	15.5575	15.5575	11.5564	23.2821	0	3	0
GO:0000413	9	protein peptidyl-prolyl isomerization	30	35	1	1	1	0.87021	0.4697	0.4697	2.86	300211	Fkbp11	1372653_at		0.440886	0.440886	0.440886		0.440886		0.0613593	0.0613593	0.0613593		0.0613593		25000000	25000000	25000000		25000000						0.440886	0.0613593	25000000	1	0	1	300211	1372653_at	0.440886	0.440886		0.0613593
GO:0000724	8	double-strand break repair via homologous recombination	68	70	2	2	2	0.86923	0.35839	0.35839	2.86	298884;311078	Gen1;Psmd14	1384102_at;1386073_at		36.4879	36.4879	33.6809	3.9697	34.2545	2.40457	23.1717	23.1717	21.1562	2.85042	21.568	1.72659	83.7638	83.7638	75.2628	12.0222	76.9998	7.28221					33.6809;39.2949	21.1562;25.1873	75.2628;92.2647	1	1	1	311078	1386073_at	39.2949	39.2949		25.1873
GO:0000725	7	recombinational repair	70	72	2	2	2	0.86105	0.37133	0.37133	2.78	298884;311078	Gen1;Psmd14	1384102_at;1386073_at		36.4879	36.4879	33.6809	3.9697	34.2545	2.40457	23.1717	23.1717	21.1562	2.85042	21.568	1.72659	83.7638	83.7638	75.2628	12.0222	76.9998	7.28221					33.6809;39.2949	21.1562;25.1873	75.2628;92.2647	1	1	1	311078	1386073_at	39.2949	39.2949		25.1873
GO:0000726	7	non-recombinational repair	30	31	1	1	1	0.89384	0.42978	0.42978	3.23	311078	Psmd14	1386073_at		39.2949	39.2949	39.2949		39.2949		25.1873	25.1873	25.1873		25.1873		92.2647	92.2647	92.2647		92.2647						39.2949	25.1873	92.2647	1	0	1	311078	1386073_at	39.2949	39.2949		25.1873
GO:0000737	7	DNA catabolic process, endonucleolytic	16	17	1	1	1	0.96351	0.26499	0.26499	5.88	298884	Gen1	1384102_at		33.6809	33.6809	33.6809		33.6809		21.1562	21.1562	21.1562		21.1562		75.2628	75.2628	75.2628		75.2628		0	33.6809			33.6809	21.1562	75.2628	0	1	0
GO:0000738	7	DNA catabolic process, exonucleolytic	5	5	1	1	1	0.99691	0.086532	0.086532	20	298884	Gen1	1384102_at		33.6809	33.6809	33.6809		33.6809		21.1562	21.1562	21.1562		21.1562		75.2628	75.2628	75.2628		75.2628		0	33.6809	0	33.6809	33.6809	21.1562	75.2628	0	1	0
GO:0000768	4	syncytium formation by plasma membrane fusion	23	24	2	2	2	0.99127	0.068282	0.068282	8.33	679806;309499	Fer1l5;Myof	1396729_at;1375857_at		32.9849	32.9849	27.1651	8.23044	32.5457	8.20697	22.0031	22.0031	18.6754	4.70601	21.7519	4.69259	68.4039	68.4039	49.061	27.355	66.9441	27.277	0.5	32.9849			38.8047;27.1651	25.3307;18.6754	87.7468;49.061	1	1	1	679806	1396729_at	38.8047	38.8047		25.3307
GO:0000902	5	cell morphogenesis	208	216	3	3	3	0.45535	0.748	1	1.39	94268;64558;25690	Efna1;Fzd4;Ahr	1372844_at;1369468_at;1369146_a_at	64558(0.3921)	8.45171	0.487373	0.0781713	14.1505	9.05558	14.2524	5.87491	0.0641274	1.15429e-07	10.1202	6.24672	10.2482	1.66667e+07	25000000	41.8713	1.44337e+07	1.61604e+07	1.46382e+07					24.7896;0.0781713;0.487373	17.5606;1.15429E-7;0.0641274	41.8713;2.5E7;2.5E7	3	0	3	94268;64558;25690	1372844_at;1369468_at;1369146_a_at	8.45171	0.487373	14.1505	5.87491
GO:0000904	6	cell morphogenesis involved in differentiation	122	130	2	2	2	0.58644	0.68065	1	1.54	94268;64558	Efna1;Fzd4	1372844_at;1369468_at	64558(0.3921)	12.4339	12.4339	0.0781713	17.4736	21.1923	12.325	8.7803	8.7803	1.15429e-07	12.4172	15.0043	8.75849	1.25e+07	1.25e+07	41.8713	1.76776e+07	3.6393e+06	1.24689e+07					24.7896;0.0781713	17.5606;1.15429E-7	41.8713;2.5E7	2	0	2	94268;64558	1372844_at;1369468_at	12.4339	12.4339	17.4736	8.7803
GO:0001101	4	response to acid chemical	449	467	13	13	13	0.95798	0.077875	0.10742	2.78	288985;24314;24423;296654;81806;291671;170913;246074;246097;24614;25303;83500;29487	Insig2;Nqo1;Gstm1;Gsn;Serpina7;Hspa9;Abcb1a;Scd1;Fas;Orm1;Abcc2;Slc22a8;Gstt2	1389377_at,1393690_at;1387599_a_at;1386985_at;1371414_at;1371143_at;1389930_at;1370464_at,1370465_at;1370355_at;1397221_s_at;1368731_at;1368497_at;1385005_at;1368409_at		18.645	18.813	0.0158072	15.979	21.7945	16.1345	11.8078	13.6472	2.85172e-09	9.96736	13.9657	10.0696	38496.7	32.2415	0.117549	138664	16052.6	91616.7					18.81295;8.72415;20.1987;0.530685;34.2065;0.01714575;2.461988;28.83;0.0158072;47.8233;16.7895;39.8058;24.1682	13.64725;3.19261;14.5817;0.0822551;22.0522;2.85172E-9;0.077203;20.5359;6.31202E-5;25.5109;12.3882;24.25;17.1827	29.77735;22.2679;32.2415;21.0222;73.6665;0.1175485;10.065059999999999;49.6939;500000.0;49.603;25.4932;102.264;40.4119	12	3	10	288985;24314;24423;291671;170913;246074;246097;24614;25303;29487	1389377_at,1393690_at;1387599_a_at;1386985_at;1389930_at;1370464_at,1370465_at;1370355_at;1397221_s_at;1368731_at;1368497_at;1368409_at	16.7842	17.8012	14.9489	10.7117
GO:0001501	5	skeletal system development	112	117	4	4	4	0.9406	0.15871	0.15871	3.42	116548;29454;24162;80881	Pcsk5;Gdf11;Acp2;Serp1	1392773_at;1374706_at;1367906_at;1386900_at	116548(-0.2018);29454(-0.1579)	21.5295	26.0219	1.62109	13.6692	16.5241	15.1586	14.4044	18.0267	0.105802	9.69326	10.8603	10.8342	6.25004e+06	57.8717	42.1138	1.25e+07	1.06527e+07	1.42752e+07					24.5208;1.62109;27.523;32.4532	17.1812;0.105802;18.8722;21.4582	42.1138;2.5E7;50.0632;65.6803	3	1	3	116548;24162;80881	1392773_at;1367906_at;1386900_at	28.1657	27.523	4.00506	19.1705
GO:0001503	3	ossification	111	120	2	2	2	0.63499	0.63761	1	1.67	291132;81707	Gpld1;Mmp14	1380833_at;1367860_a_at		23.4263	23.4263	9.29434	19.9856	10.9672	9.43217	14.119	14.119	4.33067	13.8428	5.48935	6.53306	55.2617	55.2617	24.0279	44.1713	27.7252	20.8465					9.29434;37.5583	4.33067;23.9073	24.0279;86.4955	0	2	0
GO:0001505	4	regulation of neurotransmitter levels	248	258	5	5	5	0.68232	0.49414	0.81033	1.94	299857;25419;25426;29441;24311	Shmt2;Crp;Cyp1b1;Por;Ddc	1388695_at;1387830_at;1368990_at;1368213_at,1387109_at;1368064_a_at		16.1021	15.4996	7.86658	7.91892	18.8772	8.51252	9.03255	9.02697	0.0550111	7.82303	11.6212	7.62584	32.8227	31.8289	20.2174	10.4521	36.5887	12.3345					7.86658;20.2265;27.2489;15.499569999999999;9.66871	2.76025;14.599;18.7215;9.02697;0.0550111	20.2174;32.2998;49.2941;30.4732;31.8289	6	0	5	299857;25419;25426;29441;24311	1388695_at;1387830_at;1368990_at;1368213_at,1387109_at;1368064_a_at	16.1021	15.4996	7.91892	9.03255
GO:0001508	5	action potential	76	76	2	2	2	0.84419	0.39688	0.39688	2.63	117106;29686	Scarb2;Scn1b	1368379_at;1387010_s_at		8.757	8.757	0.288393	11.9764	13.3531	10.0591	6.4356	6.4356	0.057104	9.02056	9.89735	7.57648	250013	250013	25.8244	353535	114340	296939					17.2256;0.288393	12.8141;0.057104	25.8244;500000.0	1	1	1	117106	1368379_at	17.2256	17.2256		12.8141
GO:0001516	8	prostaglandin biosynthetic process	15	15	1	1	1	0.97116	0.23786	0.23786	6.67	362676	Fam213b	1379367_at		48.0248	48.0248	48.0248		48.0248		29.3052	29.3052	29.3052		29.3052		50.2806	50.2806	50.2806		50.2806		0	48.0248			48.0248	29.3052	50.2806	1	0	1	362676	1379367_at	48.0248	48.0248		29.3052
GO:0001523	8	retinoid metabolic process	41	44	2	2	2	0.95597	0.18648	0.18648	4.55	24296;25426	Cyp1a1;Cyp1b1	1370269_at;1368990_at		13.6949	13.6949	0.140946	19.1682	16.0054	18.8877	9.38637	9.38637	0.0512492	13.2019	10.9777	13.0086	31.3051	31.3051	13.316	25.4404	34.3716	25.068					0.140946;27.2489	0.0512492;18.7215	13.316;49.2941	2	0	2	24296;25426	1370269_at;1368990_at	13.6949	13.6949	19.1682	9.38637
GO:0001525	4	angiogenesis	204	214	8	8	8	0.98485	0.039211	0.059327	3.74	303735;94268;260326;315430;24536;29516;25426;81707	Rnf213;Efna1;Gpr56;Amotl1;Lepr;Pde3b;Cyp1b1;Mmp14	1374337_at;1372844_at;1371696_at;1371627_at;1370604_at,1370605_s_at,1371223_a_at,1388232_a_at;1369157_at;1368990_at;1367860_a_at	24536(-0.2274)	24.8693	27.2775	0.0925913	12.483	23.5358	10.9873	16.0036	18.8941	0.0342073	8.59667	15.1839	7.95876	796925	52.7536	0.778	2.25389e+06	1.05708e+06	2.53462e+06					29.6021;24.7896;37.9776;0.0925913;14.379010000000001;27.3061;27.2489;37.5583	19.9907;17.5606;23.3019;0.0342073;5.44549525;19.0667;18.7215;23.9073	56.2131;41.8713;93.5361;0.778;6375024.07585;48.0975;49.2941;86.4955	4	7	4	303735;94268;29516;25426	1374337_at;1372844_at;1369157_at;1368990_at	27.2367	27.2775	1.9654	18.8349
GO:0001541	5	ovarian follicle development	50	53	4	4	4	0.99747	0.014863	0.014863	7.55	304608;25690;29200;81707	Mmp19;Ahr;Inhba;Mmp14	1391095_at;1369146_a_at;1369012_at,1383486_at;1367860_a_at		26.5013	33.5388	0.487373	17.801	7.0405	15.9439	17.0901	22.0923	0.0641274	11.4865	4.32792	10.3312	6.25005e+06	70.4835	53.349	1.25e+07	2.03477e+07	1.12347e+07	1.5	33.5388			29.5192;0.487373;38.44015;37.5583	20.2773;0.0641274;24.11155;23.9073	54.4716;2.5E7;53.34895;86.4955	2	3	2	304608;25690	1391095_at;1369146_a_at	15.0033	15.0033	20.5286	10.1707
GO:0001542	4	ovulation from ovarian follicle	10	12	2	2	2	0.99889	0.018779	0.018779	16.67	304608;24536	Mmp19;Lepr	1391095_at;1370604_at,1370605_s_at,1371223_a_at,1388232_a_at	24536(-0.2274)	21.9491	21.9491	14.379	10.7057	15.8422	6.32646	12.8614	12.8614	5.4455	10.4877	6.87888	6.1976	3.18754e+06	3.18754e+06	54.4716	4.50778e+06	5.75893e+06	2.66384e+06	0	14.379	0.5	21.9491	29.5192;14.379010000000001	20.2773;5.44549525	54.4716;6375024.07585	1	4	1	304608	1391095_at	29.5192	29.5192		20.2773
GO:0001552	4	ovarian follicle atresia	4	5	1	1	1	0.99691	0.086532	0.086532	20	246097	Fas	1397221_s_at		0.0158072	0.0158072	0.0158072		0.0158072		6.31202e-05	6.31202e-05	6.31202e-05		6.31202e-05		500000	500000	500000		500000		0	0.0158072	0	0.0158072	0.0158072	6.31202e-05	500000	1	0	1	246097	1397221_s_at	0.0158072	0.0158072		6.31202e-05
GO:0001553	4	luteinization	13	14	3	3	3	0.99991	0.0017908	0.0017908	21.43	286896;361659;64558	Sgpl1;Plekha1;Fzd4	1382843_at;1376762_at;1369468_at	64558(0.3921)	15.2302	22.451	0.0781713	13.1269	20.7026	8.71377	10.7149	15.9613	1.15429e-07	9.28007	14.4612	6.10968	8.33336e+06	39.6472	37.1795	1.44337e+07	2.65858e+06	9.43892e+06	0	0.0781713	0.5	11.2646	22.451;23.1615;0.0781713	15.9613;16.1835;1.15429E-7	37.1795;39.6472;2.5E7	2	1	2	286896;64558	1382843_at;1369468_at	11.2646	11.2646	15.82	7.98065
GO:0001554	4	luteolysis	4	4	1	1	1	0.99812	0.069844	0.069844	25	304608	Mmp19	1391095_at		29.5192	29.5192	29.5192		29.5192		20.2773	20.2773	20.2773		20.2773		54.4716	54.4716	54.4716		54.4716		0	29.5192	0	29.5192	29.5192	20.2773	54.4716	1	0	1	304608	1391095_at	29.5192	29.5192		20.2773
GO:0001558	5	regulation of cell growth	382	401	6	6	6	0.41716	0.72979	0.84773	1.5	60628;81613;116683;29200;81707;24484	Cxcr4;Ceacam1;Efna5;Inhba;Mmp14;Igfbp3	1389244_x_at;1374620_at,1382975_at;1375647_at;1369012_at,1383486_at;1367860_a_at;1367652_at	116683(0.1685)	28.4828	33.48	0.235955	14.4812	22.8742	17.0291	18.3429	21.7253	0.0107916	9.23801	14.8444	11.0599	4.16672e+06	71.6028	52.381	1.02062e+07	7.81099e+06	1.26931e+07					0.235955;30.432450000000003;27.7022;38.44015;37.5583;36.5276	0.0107916;20.409799999999997;18.5771;24.11155;23.9073;23.0409	2.5E7;59.101;52.381;53.34895;86.4955;84.1046	2	6	1	81613	1374620_at,1382975_at	30.4324	30.4324		20.4098
GO:0001568	4	blood vessel development	142	145	5	5	5	0.95351	0.11972	0.19113	3.45	116548;60628;81613;64558;25690	Pcsk5;Cxcr4;Ceacam1;Fzd4;Ahr	1392773_at;1389244_x_at;1374620_at,1382975_at;1369468_at;1369146_a_at	116548(-0.2018);64558(0.3921)	11.1509	0.487373	0.0781713	15.0498	12.0502	14.9789	7.53318	0.0641274	1.15429e-07	10.3442	8.14228	10.355	1.5e+07	25000000	42.1138	1.3693e+07	1.4086e+07	1.38624e+07					24.5208;0.235955;30.432450000000003;0.0781713;0.487373	17.1812;0.0107916;20.409799999999997;1.15429E-7;0.0641274	42.1138;2.5E7;59.101;2.5E7;2.5E7	5	1	4	116548;81613;64558;25690	1392773_at;1374620_at,1382975_at;1369468_at;1369146_a_at	13.8797	12.5041	15.8857	9.41378
GO:0001569	6	branching involved in blood vessel morphogenesis	32	32	2	2	2	0.98074	0.11195	0.11195	6.25	60628;25690	Cxcr4;Ahr	1389244_x_at;1369146_a_at		0.361664	0.361664	0.235955	0.177779	0.402295	0.168237	0.0374595	0.0374595	0.0107916	0.0377141	0.046079	0.0356898	25000000	25000000	25000000	0	25000000	5.26836e-09	0.5	0.361664			0.235955;0.487373	0.0107916;0.0641274	2.5E7;2.5E7	1	1	1	25690	1369146_a_at	0.487373	0.487373		0.0641274
GO:0001570	5	vasculogenesis	62	65	2	2	2	0.88889	0.32567	0.32567	3.08	286896;64558	Sgpl1;Fzd4	1382843_at;1369468_at	64558(0.3921)	11.2646	11.2646	0.0781713	15.82	1.2495	7.04753	7.98065	7.98065	1.15429e-07	11.2863	0.835651	5.02788	1.25e+07	1.25e+07	37.1795	1.76776e+07	2.36911e+07	7.87509e+06					22.451;0.0781713	15.9613;1.15429E-7	37.1795;2.5E7	2	0	2	286896;64558	1382843_at;1369468_at	11.2646	11.2646	15.82	7.98065
GO:0001580	7	detection of chemical stimulus involved in sensory perception of bitter taste	20	20	2	2	2	0.99482	0.049234	0.049234	10	360733;363143	Rtp4;Gnat1	1379285_at;1373587_at		17.2169	17.2169	0.292383	23.9349	8.01597	20.0889	11.1721	11.1721	0.0515247	15.7268	5.12642	13.1997	1.25e+07	1.25e+07	71.9494	1.76776e+07	1.92956e+07	1.48371e+07	0	0.292383	1	34.1415	0.292383;34.1415	0.0515247;22.2926	2.5E7;71.9494	2	0	2	360733;363143	1379285_at;1373587_at	17.2169	17.2169	23.9349	11.1721
GO:0001649	5	osteoblast differentiation	69	73	1	1	1	0.62224	0.73419	1	1.37	24484	Igfbp3	1367652_at		36.5276	36.5276	36.5276		36.5276		23.0409	23.0409	23.0409		23.0409		84.1046	84.1046	84.1046		84.1046						36.5276	23.0409	84.1046	0	1	0
GO:0001654	6	eye development	103	107	4	4	4	0.95663	0.12608	0.12608	3.74	308843;680102;24296;25690	Tsku;Mab21l2;Cyp1a1;Ahr	1383315_at;1378988_at;1370269_at;1369146_a_at		3.09777	2.58301	0.140946	3.36388	1.87085	3.21637	0.0903846	0.0766221	0.0512492	0.0471389	0.067126	0.0196413	6.37501e+06	250014	13.316	1.24189e+07	1.21773e+07	1.44213e+07					7.08411;4.67865;0.140946;0.487373	0.0891169;0.157045;0.0512492;0.0641274	28.1042;500000.0;13.316;2.5E7	4	0	4	308843;680102;24296;25690	1383315_at;1378988_at;1370269_at;1369146_a_at	3.09777	2.58301	3.36388	0.0903846
GO:0001656	6	metanephros development	40	40	1	1	1	0.83919	0.51571	0.51571	2.5	29454	Gdf11	1374706_at	29454(-0.1579)	1.62109	1.62109	1.62109		1.62109		0.105802	0.105802	0.105802		0.105802		25000000	25000000	25000000		25000000						1.62109	0.105802	25000000	0	1	0
GO:0001657	6	ureteric bud development	45	45	2	2	2	0.95343	0.19299	0.19299	4.44	29454;494500	Gdf11;Gsta3	1374706_at;1371089_at	29454(-0.1579)	13.1336	13.1336	1.62109	16.2812	3.89071	9.7064	8.67975	8.67975	0.105802	12.1254	1.7961	7.22882	1.25e+07	1.25e+07	42.4262	1.76776e+07	2.25357e+07	1.05389e+07					1.62109;24.6462	0.105802;17.2537	2.5E7;42.4262	1	1	1	494500	1371089_at	24.6462	24.6462		17.2537
GO:0001666	4	response to hypoxia	362	375	12	12	12	0.98216	0.038066	0.046273	3.2	689931;25419;170913;24296;60628;246097;24536;24651;65155;81707;83619;24484	Mgarp;Crp;Abcb1a;Cyp1a1;Cxcr4;Fas;Lepr;Pklr;Alas1;Mmp14;Nfe2l2;Igfbp3	1393627_at;1387830_at;1370464_at,1370465_at;1370269_at;1389244_x_at;1397221_s_at;1370604_at,1370605_s_at,1371223_a_at,1388232_a_at;1368651_at,1387263_at;1367982_at;1367860_a_at;1367826_at;1367652_at	24536(-0.2274)	13.7168	11.4596	0.0158072	13.395	10.2233	10.866	8.32471	4.23488	6.31202e-05	9.11632	5.65863	7.43624	2.65628e+06	35.6627	10.0651	7.26899e+06	3.35623e+06	7.93984e+06					14.6526;20.2265;2.461988;0.140946;0.235955;0.0158072;14.379010000000001;23.027;6.83525;37.5583;8.54018;36.5276	11.1178;14.599;0.077203;0.0512492;0.0107916;6.31202E-5;5.44549525;16.181649999999998;3.02426;23.9073;2.44081;23.0409	21.0678;32.2998;10.065059999999999;13.316;2.5E7;500000.0;6375024.07585;39.02565;16.0192;86.4955;23.1149;84.1046	8	9	7	689931;25419;170913;24296;246097;65155;83619	1393627_at;1387830_at;1370464_at,1370465_at;1370269_at;1397221_s_at;1367982_at;1367826_at	7.55332	6.83525	7.63957	4.47291
GO:0001667	5	ameboidal-type cell migration	136	145	4	4	4	0.88028	0.26282	0.33423	2.76	286896;291132;60628;25426	Sgpl1;Gpld1;Cxcr4;Cyp1b1	1382843_at;1380833_at;1389244_x_at;1368990_at		14.8075	15.8727	0.235955	12.328	13.9144	12.5495	9.75607	10.146	0.0107916	9.00535	8.71755	9.1305	6.25003e+06	43.2368	24.0279	1.25e+07	5.79041e+06	1.21782e+07					22.451;9.29434;0.235955;27.2489	15.9613;4.33067;0.0107916;18.7215	37.1795;24.0279;2.5E7;49.2941	2	2	2	286896;25426	1382843_at;1368990_at	24.8499	24.8499	3.39263	17.3414
GO:0001676	7	long-chain fatty acid metabolic process	59	63	2	2	2	0.8964	0.31245	0.31245	3.17	171402;25426	Elovl6;Cyp1b1	1388108_at;1368990_at		18.4325	18.4325	9.61605	12.4683	23.1947	10.4929	10.7904	10.7904	2.85924	11.2163	15.0744	9.43923	38.6272	38.6272	27.9604	15.0852	44.389	12.6952					9.61605;27.2489	2.85924;18.7215	27.9604;49.2941	2	0	2	171402;25426	1388108_at;1368990_at	18.4325	18.4325	12.4683	10.7904
GO:0001678	6	cellular glucose homeostasis	108	113	4	4	4	0.94737	0.1453	0.1453	3.54	25627;309957;246097;64045	Cma1;Mef2a;Fas;Glrx	1387173_at;1378360_at;1397221_s_at;1367705_at,1386908_at		12.391	7.82056	0.0158072	16.1208	20.0269	17.7005	7.89164	4.87554	2.85172e-09	10.3583	12.8367	11.4091	125026	51.2578	0.117549	249983	128967	252533					0.01714575;33.9069;0.0158072;15.623975	2.85172E-9;21.8155;6.31202E-5;9.751014999999999	0.1175485;72.9728;500000.0;29.54275	3	2	2	246097;64045	1397221_s_at;1367705_at,1386908_at	7.81989	7.81989	11.0366	4.87554
GO:0001702	6	gastrulation with mouth forming second	23	25	1	1	1	0.92663	0.36422	0.36422	4	83472	Ugdh	1367938_at		20.3319	20.3319	20.3319		20.3319		14.7989	14.7989	14.7989		14.7989		32.0222	32.0222	32.0222		32.0222						20.3319	14.7989	32.0222	1	0	1	83472	1367938_at	20.3319	20.3319		14.7989
GO:0001704	4	formation of primary germ layer	51	51	2	2	2	0.93672	0.23254	0.23254	3.92	58819;29200	Txnrd1;Inhba	1386958_at;1369012_at,1383486_at		30.0521	30.0521	21.6641	11.8625	35.2125	9.35197	19.8896	19.8896	15.6676	5.97077	22.487	4.70716	44.0284	44.0284	34.7079	13.1812	49.7625	10.3916					21.6641;38.44015	15.6676;24.11155	34.7079;53.34895	1	2	1	58819	1386958_at	21.6641	21.6641		15.6676
GO:0001707	5	mesoderm formation	40	40	2	2	2	0.96542	0.16081	0.16081	5	58819;29200	Txnrd1;Inhba	1386958_at;1369012_at,1383486_at		30.0521	30.0521	21.6641	11.8625	35.2125	9.35197	19.8896	19.8896	15.6676	5.97077	22.487	4.70716	44.0284	44.0284	34.7079	13.1812	49.7625	10.3916	1	38.4402			21.6641;38.44015	15.6676;24.11155	34.7079;53.34895	1	2	1	58819	1386958_at	21.6641	21.6641		15.6676
GO:0001763	3	morphogenesis of a branching structure	164	167	4	4	4	0.81874	0.35166	0.54685	2.4	25697;60628;25690;81707	Ctsl;Cxcr4;Ahr;Mmp14	1370244_at;1389244_x_at;1369146_a_at;1367860_a_at		9.60018	0.361664	0.119104	18.6394	1.32577	6.92595	6.00498	0.0509185	0.0107916	11.9349	0.680137	4.43848	1.25e+07	1.25e+07	4.56418	1.44337e+07	1.8424e+07	1.27099e+07					0.119104;0.235955;0.487373;37.5583	0.0377096;0.0107916;0.0641274;23.9073	4.56418;2.5E7;2.5E7;86.4955	2	2	2	25697;25690	1370244_at;1369146_a_at	0.303239	0.303239	0.260406	0.0509185
GO:0001764	5	neuron migration	120	122	2	2	2	0.62521	0.64657	1	1.64	84422;60628	Gfra3;Cxcr4	1377680_at;1389244_x_at		12.1669	12.1669	0.235955	16.8729	11.2649	16.8247	8.35595	8.35595	0.0107916	11.8018	7.72503	11.7681	1.25e+07	1.25e+07	42.0531	1.76776e+07	1.34451e+07	1.7627e+07					24.0979;0.235955	16.7011;0.0107916	42.0531;2.5E7	0	2	0
GO:0001775	3	cell activation	386	407	6	6	6	0.40138	0.74273	0.84834	1.47	245920;89843;360481;29199;60628;24536	Cxcl10;Cxadr;Dnaja3;Hfe;Cxcr4;Lepr	1387969_at;1384816_at;1378392_at;1370772_a_at;1389244_x_at;1370604_at,1370605_s_at,1371223_a_at,1388232_a_at	24536(-0.2274)	17.3643	18.5977	0.235955	15.0523	13.3078	14.4795	10.8863	10.8127	0.0107916	10.3401	8.10665	9.81672	9.39587e+06	3.18755e+06	38.0215	1.23365e+07	1.23958e+07	1.26864e+07					0.324767;22.8164;31.2133;35.2166;0.235955;14.379010000000001	0.0408567;16.18;20.8292;22.8112;0.0107916;5.44549525	2.5E7;38.0215;61.4029;76.2381;2.5E7;6375024.07585	4	5	4	245920;89843;360481;29199	1387969_at;1384816_at;1378392_at;1370772_a_at	22.3928	27.0148	15.593	14.9653
GO:0001776	5	leukocyte homeostasis	57	60	2	2	2	0.90727	0.29252	0.29252	3.33	246097;25690	Fas;Ahr	1397221_s_at;1369146_a_at		0.25159	0.25159	0.0158072	0.333447	0.416541	0.238264	0.0320953	0.0320953	6.31202e-05	0.0453003	0.0545045	0.0323692	12750000	12750000	500000	1.73241e+07	2.13199e+07	1.23789e+07					0.0158072;0.487373	6.31202E-5;0.0641274	500000.0;2.5E7	2	0	2	246097;25690	1397221_s_at;1369146_a_at	0.25159	0.25159	0.333447	0.0320953
GO:0001778	6	plasma membrane repair	9	9	1	1	1	0.98939	0.15036	0.15036	11.11	309499	Myof	1375857_at		27.1651	27.1651	27.1651		27.1651		18.6754	18.6754	18.6754		18.6754		49.061	49.061	49.061		49.061		0	27.1651	0	27.1651	27.1651	18.6754	49.061	0	1	0
GO:0001782	7	B cell homeostasis	22	25	1	1	1	0.92663	0.36422	0.36422	4	25690	Ahr	1369146_a_at		0.487373	0.487373	0.487373		0.487373		0.0641274	0.0641274	0.0641274		0.0641274		25000000	25000000	25000000		25000000						0.487373	0.0641274	25000000	1	0	1	25690	1369146_a_at	0.487373	0.487373		0.0641274
GO:0001816	3	cytokine production	73	74	1	1	1	0.61584	0.73899	1	1.35	260326	Gpr56	1371696_at		37.9776	37.9776	37.9776		37.9776		23.3019	23.3019	23.3019		23.3019		93.5361	93.5361	93.5361		93.5361						37.9776	23.3019	93.5361	0	1	0
GO:0001817	5	regulation of cytokine production	487	505	14	14	14	0.96137	0.070862	0.1192	2.77	297989;25419;24539;303538;298693;311021;361730;29199;294270;81613;25476;25426;29547;24614	Ddx58;Crp;Lpl;Dhx58;Isg15;Nmi;Dak;Hfe;RT1-Db1;Ceacam1;Lgals9;Cyp1b1;Homer2;Orm1	1391463_at;1387830_at;1386965_at;1385276_a_at;1382314_at;1381875_at;1377048_at;1370772_a_at;1370382_at,1370383_s_at;1374620_at,1382975_at;1387027_a_at;1368990_at;1368872_a_at;1368731_at		27.4867	30.1822	0.230619	12.7925	27.2173	13.559	17.5084	19.6732	0.0445238	7.56456	17.1426	8.12222	1.80362e+06	58.1723	30.9363	6.67671e+06	3.1208e+06	8.55733e+06					19.5705;20.2265;36.9287;32.0559;29.9319;0.230619;28.0913;35.2166;4.6979455;30.432450000000003;36.5565;27.2489;35.8021;47.8233	14.1871;14.599;23.617;21.2581;20.1643;0.0445238;19.1821;22.8112;2.6781043;20.409799999999997;23.4439;18.7215;18.4899;25.5109	30.9363;32.2998;83.6043;64.2812;57.2437;2.5E7;51.6873;76.2381;250023.52665;59.101;81.9429;49.2941;48.0406;49.603	15	1	13	297989;25419;24539;303538;298693;311021;29199;294270;81613;25476;25426;29547;24614	1391463_at;1387830_at;1386965_at;1385276_a_at;1382314_at;1381875_at;1370772_a_at;1370382_at,1370383_s_at;1374620_at,1382975_at;1387027_a_at;1368990_at;1368872_a_at;1368731_at	27.4401	30.4324	13.3137	17.3796
GO:0001818	6	negative regulation of cytokine production	189	192	8	8	8	0.99218	0.022518	0.022518	4.17	303538;311021;29199;294270;81613;25476;29547;24614	Dhx58;Nmi;Hfe;RT1-Db1;Ceacam1;Lgals9;Homer2;Orm1	1385276_a_at;1381875_at;1370772_a_at;1370382_at,1370383_s_at;1374620_at,1382975_at;1387027_a_at;1368872_a_at;1368731_at		27.8519	33.6362	0.230619	16.5419	26.7802	16.9968	16.8308	20.8339	0.0445238	9.79856	16.0977	10.0619	3.1563e+06	70.2596	48.0406	8.82662e+06	4.8443e+06	1.05398e+07					32.0559;0.230619;35.2166;4.6979455;30.432450000000003;36.5565;35.8021;47.8233	21.2581;0.0445238;22.8112;2.6781043;20.409799999999997;23.4439;18.4899;25.5109	64.2812;2.5E7;76.2381;250023.52665;59.101;81.9429;48.0406;49.603	10	0	8	303538;311021;29199;294270;81613;25476;29547;24614	1385276_a_at;1381875_at;1370772_a_at;1370382_at,1370383_s_at;1374620_at,1382975_at;1387027_a_at;1368872_a_at;1368731_at	27.8519	33.6362	16.5419	16.8308
GO:0001819	6	positive regulation of cytokine production	313	323	6	6	6	0.64025	0.52343	0.8315	1.86	297989;24539;303538;25476;25426;24614	Ddx58;Lpl;Dhx58;Lgals9;Cyp1b1;Orm1	1391463_at;1386965_at;1385276_a_at;1387027_a_at;1368990_at;1368731_at		33.364	34.3062	19.5705	9.60559	33.7211	8.43219	21.1231	22.351	14.1871	4.1171	21.3949	3.31214	59.9436	56.9421	30.9363	20.6125	60.4416	16.8488					19.5705;36.9287;32.0559;36.5565;27.2489;47.8233	14.1871;23.617;21.2581;23.4439;18.7215;25.5109	30.9363;83.6043;64.2812;81.9429;49.2941;49.603	6	0	6	297989;24539;303538;25476;25426;24614	1391463_at;1386965_at;1385276_a_at;1387027_a_at;1368990_at;1368731_at	33.364	34.3062	9.60559	21.1231
GO:0001822	5	kidney development	153	162	3	3	3	0.66874	0.55855	0.76759	1.85	116548;286896;29454	Pcsk5;Sgpl1;Gdf11	1392773_at;1382843_at;1374706_at	116548(-0.2018);29454(-0.1579)	16.1976	22.451	1.62109	12.666	11.1985	13.8265	11.0828	15.9613	0.105802	9.52588	7.24839	10.3112	8.33336e+06	42.1138	37.1795	1.44337e+07	1.45366e+07	1.51047e+07					24.5208;22.451;1.62109	17.1812;15.9613;0.105802	42.1138;37.1795;2.5E7	2	1	2	116548;286896	1392773_at;1382843_at	23.4859	23.4859	1.46357	16.5712
GO:0001837	6	epithelial to mesenchymal transition	59	61	2	2	2	0.90371	0.29918	0.29918	3.28	287534;94268	Fam101b;Efna1	1377940_at;1372844_at		30.8434	30.8434	24.7896	8.56137	28.1542	7.67026	20.3589	20.3589	17.5606	3.95739	19.1158	3.54549	63.9676	63.9676	41.8713	31.2489	54.1519	27.9964					36.8972;24.7896	23.1572;17.5606	86.0639;41.8713	1	1	1	94268	1372844_at	24.7896	24.7896		17.5606
GO:0001887	4	selenium compound metabolic process	5	5	1	1	1	0.99691	0.086532	0.086532	20	363285	Scly	1374524_at		22.0766	22.0766	22.0766		22.0766		15.7357	15.7357	15.7357		15.7357		36.3291	36.3291	36.3291		36.3291		0	22.0766	0	22.0766	22.0766	15.7357	36.3291	1	0	1	363285	1374524_at	22.0766	22.0766		15.7357
GO:0001889	6	liver development	186	200	7	7	7	0.97214	0.068869	0.094896	3.5	25315;58919;81750;29199;24296;246097;25690	Ephx1;Ccnd1;Pros1;Hfe;Cyp1a1;Fas;Ahr	1387669_a_at;1371150_at,1371643_at,1383075_at;1371037_at;1370772_a_at;1370269_at;1397221_s_at;1369146_a_at		11.8846	8.09437	0.0158072	13.6628	9.80737	13.4926	7.70832	2.7845	6.31202e-05	9.34803	6.35407	9.15887	3.64288e+06	40.0585	13.316	9.41945e+06	7.83677e+06	1.24953e+07					8.09437;15.557466666666665;23.6793;35.2166;0.140946;0.0158072;0.487373	2.7845;11.556399999999998;16.6907;22.8112;0.0512492;6.31202E-5;0.0641274	20.9633;23.282066666666665;40.0585;76.2381;13.316;500000.0;2.5E7	6	3	6	25315;81750;29199;24296;246097;25690	1387669_a_at;1371037_at;1370772_a_at;1370269_at;1397221_s_at;1369146_a_at	11.2724	4.29087	14.8613	7.06697
GO:0001890	5	placenta development	41	49	2	2	2	0.94256	0.21928	0.21928	4.08	58819;170913	Txnrd1;Abcb1a	1386958_at;1370464_at,1370465_at		12.063	12.063	2.46199	13.5779	3.24942	5.38523	7.8724	7.8724	0.077203	11.0241	0.71653	4.37233	22.3865	22.3865	10.0651	17.4251	11.0756	6.91109					21.6641;2.461988	15.6676;0.077203	34.7079;10.065059999999999	3	0	2	58819;170913	1386958_at;1370464_at,1370465_at	12.063	12.063	13.5779	7.8724
GO:0001894	6	tissue homeostasis	113	117	2	2	2	0.6497	0.62385	1	1.71	89843;29547	Cxadr;Homer2	1384816_at;1368872_a_at		29.3092	29.3092	22.8164	9.18228	30.3791	9.05676	17.3349	17.3349	16.18	1.63335	17.5253	1.61102	43.0311	43.0311	38.0215	7.08457	43.8565	6.98773					22.8164;35.8021	16.18;18.4899	38.0215;48.0406	2	0	2	89843;29547	1384816_at;1368872_a_at	29.3092	29.3092	9.18228	17.3349
GO:0001906	2	cell killing	40	49	2	2	2	0.94256	0.21928	0.21928	4.08	316010;29199	Camp;Hfe	1393603_at;1370772_a_at		32.6391	32.6391	30.0616	3.64514	32.4748	3.63773	21.5217	21.5217	20.2323	1.82356	21.4396	1.81985	66.9456	66.9456	57.6531	13.1416	66.3534	13.1149					30.0616;35.2166	20.2323;22.8112	57.6531;76.2381	1	1	1	29199	1370772_a_at	35.2166	35.2166		22.8112
GO:0001909	3	leukocyte mediated cytotoxicity	18	23	1	1	1	0.93668	0.34074	0.34074	4.35	29199	Hfe	1370772_a_at		35.2166	35.2166	35.2166		35.2166		22.8112	22.8112	22.8112		22.8112		76.2381	76.2381	76.2381		76.2381						35.2166	22.8112	76.2381	1	0	1	29199	1370772_a_at	35.2166	35.2166		22.8112
GO:0001910	5	regulation of leukocyte mediated cytotoxicity	56	69	3	3	3	0.96477	0.12674	0.12674	4.35	29199;81613;25476	Hfe;Ceacam1;Lgals9	1370772_a_at;1374620_at,1382975_at;1387027_a_at		34.0685	35.2166	30.4324	3.21941	33.75	3.33464	22.2216	22.8112	20.4098	1.60067	22.0627	1.65828	72.4273	76.2381	59.101	11.8882	71.2656	12.3053					35.2166;30.432450000000003;36.5565	22.8112;20.409799999999997;23.4439	76.2381;59.101;81.9429	4	0	3	29199;81613;25476	1370772_a_at;1374620_at,1382975_at;1387027_a_at	34.0685	35.2166	3.21941	22.2216
GO:0001911	6	negative regulation of leukocyte mediated cytotoxicity	14	17	2	2	2	0.99678	0.036494	0.036494	11.76	81613;25476	Ceacam1;Lgals9	1374620_at,1382975_at;1387027_a_at		33.4945	33.4945	30.4324	4.33036	33.1333	4.30013	21.9268	21.9268	20.4098	2.14543	21.7479	2.13046	70.522	70.522	59.101	16.1517	69.1748	16.0389	0	30.4324	0.5	33.4945	30.432450000000003;36.5565	20.409799999999997;23.4439	59.101;81.9429	3	0	2	81613;25476	1374620_at,1382975_at;1387027_a_at	33.4945	33.4945	4.33036	21.9268
GO:0001912	6	positive regulation of leukocyte mediated cytotoxicity	39	50	1	1	1	0.7741	0.59614	0.59614	2	29199	Hfe	1370772_a_at		35.2166	35.2166	35.2166		35.2166		22.8112	22.8112	22.8112		22.8112		76.2381	76.2381	76.2381		76.2381						35.2166	22.8112	76.2381	1	0	1	29199	1370772_a_at	35.2166	35.2166		22.8112
GO:0001913	6	T cell mediated cytotoxicity	7	8	1	1	1	0.99165	0.13483	0.13483	12.5	29199	Hfe	1370772_a_at		35.2166	35.2166	35.2166		35.2166		22.8112	22.8112	22.8112		22.8112		76.2381	76.2381	76.2381		76.2381		0	35.2166	0	35.2166	35.2166	22.8112	76.2381	1	0	1	29199	1370772_a_at	35.2166	35.2166		22.8112
GO:0001914	6	regulation of T cell mediated cytotoxicity	27	38	1	1	1	0.85177	0.4978	0.4978	2.63	81613	Ceacam1	1374620_at,1382975_at		30.4324	30.4324	30.4324		30.4324		20.4098	20.4098	20.4098		20.4098		59.101	59.101	59.101		59.101						30.4324	20.4098	59.101	2	0	1	81613	1374620_at,1382975_at	30.4324	30.4324		20.4098
GO:0001915	7	negative regulation of T cell mediated cytotoxicity	5	5	1	1	1	0.99691	0.086532	0.086532	20	81613	Ceacam1	1374620_at,1382975_at		30.4324	30.4324	30.4324		30.4324		20.4098	20.4098	20.4098		20.4098		59.101	59.101	59.101		59.101		0	30.4324	0	30.4324	30.4324	20.4098	59.101	2	0	1	81613	1374620_at,1382975_at	30.4324	30.4324		20.4098
GO:0001932	8	regulation of protein phosphorylation	1154	1210	20	20	20	0.40288	0.68396	0.81962	1.65	316010;288444;360481;29454;94268;299626;58919;29199;294270;60628;246097;81613;24536;25476;116683;24684;64558;29200;81664;24484	Camp;Hsph1;Dnaja3;Gdf11;Efna1;Gadd45b;Ccnd1;Hfe;RT1-Db1;Cxcr4;Fas;Ceacam1;Lepr;Lgals9;Efna5;Prlr;Fzd4;Inhba;Gnai2;Igfbp3	1393603_at;1385620_at,1388898_at;1378392_at;1374706_at;1372844_at;1372016_at;1371150_at,1371643_at,1383075_at;1370772_a_at;1370382_at,1370383_s_at;1389244_x_at;1397221_s_at;1374620_at,1382975_at;1370604_at,1370605_s_at,1371223_a_at,1388232_a_at;1387027_a_at;1375647_at;1369493_at,1370384_a_at,1370789_a_at;1369468_at;1369012_at,1383486_at;1367844_at;1367652_at	29454(-0.1579);24536(-0.2274);116683(0.1685);64558(0.3921)	22.2053	25.3727	0.0158072	14.064	21.1325	13.1117	14.4643	18.0032	1.15429e-07	9.3576	13.832	9.03628	4.10629e+06	68.8205	23.2821	9.1154e+06	5.09591e+06	9.87341e+06					30.0616;25.281950000000002;31.2133;1.62109;24.7896;25.2726;15.557466666666665;35.2166;4.6979455;0.235955;0.0158072;30.432450000000003;14.379010000000001;36.5565;27.7022;25.46343333333333;0.0781713;38.44015;40.5617;36.5276	20.2323;17.9119;20.8292;0.105802;17.5606;18.0945;11.556399999999998;22.8112;2.6781043;0.0107916;6.31202E-5;20.409799999999997;5.44549525;23.4439;18.5771;17.215933333333336;1.15429E-7;24.11155;25.2495;23.0409	57.6531;42.88935;61.4029;2.5E7;41.8713;42.0506;23.282066666666665;76.2381;250023.52665;2.5E7;500000.0;59.101;6375024.07585;81.9429;52.381;46.798966666666665;2.5E7;53.34895;101.866;84.1046	13	18	10	288444;360481;94268;299626;29199;294270;246097;81613;25476;64558	1385620_at,1388898_at;1378392_at;1372844_at;1372016_at;1370772_a_at;1370382_at,1370383_s_at;1397221_s_at;1374620_at,1382975_at;1387027_a_at;1369468_at	21.3555	25.2773	14.263	14.3739
GO:0001933	9	negative regulation of protein phosphorylation	344	359	6	6	6	0.53457	0.62697	1	1.67	288444;360481;94268;299626;81613;24484	Hsph1;Dnaja3;Efna1;Gadd45b;Ceacam1;Igfbp3	1385620_at,1388898_at;1378392_at;1372844_at;1372016_at;1374620_at,1382975_at;1367652_at		28.9196	27.8572	24.7896	4.66951	27.5374	4.11483	19.6411	19.2522	17.5606	2.15739	19	1.90614	55.2366	50.9952	41.8713	16.681	50.4584	14.5488					25.281950000000002;31.2133;24.7896;25.2726;30.432450000000003;36.5276	17.9119;20.8292;17.5606;18.0945;20.409799999999997;23.0409	42.88935;61.4029;41.8713;42.0506;59.101;84.1046	7	1	5	288444;360481;94268;299626;81613	1385620_at,1388898_at;1378392_at;1372844_at;1372016_at;1374620_at,1382975_at	27.398	25.2819	3.14496	18.9612
GO:0001934	9	positive regulation of protein phosphorylation	806	841	19	19	19	0.88019	0.1773	0.28153	2.26	316010;288444;29454;94268;299626;58919;29199;294270;60628;246097;81613;24536;25476;116683;24684;64558;29200;81664;24484	Camp;Hsph1;Gdf11;Efna1;Gadd45b;Ccnd1;Hfe;RT1-Db1;Cxcr4;Fas;Ceacam1;Lepr;Lgals9;Efna5;Prlr;Fzd4;Inhba;Gnai2;Igfbp3	1393603_at;1385620_at,1388898_at;1374706_at;1372844_at;1372016_at;1371150_at,1371643_at,1383075_at;1370772_a_at;1370382_at,1370383_s_at;1389244_x_at;1397221_s_at;1374620_at,1382975_at;1370604_at,1370605_s_at,1371223_a_at,1388232_a_at;1387027_a_at;1375647_at;1369493_at,1370384_a_at,1370789_a_at;1369468_at;1369012_at,1383486_at;1367844_at;1367652_at	29454(-0.1579);24536(-0.2274);116683(0.1685);64558(0.3921)	21.7311	25.2819	0.0158072	14.2843	20.859	13.194	14.1293	17.9119	1.15429e-07	9.49001	13.6422	9.09188	4.32241e+06	76.2381	23.2821	9.31239e+06	5.23413e+06	9.98213e+06					30.0616;25.281950000000002;1.62109;24.7896;25.2726;15.557466666666665;35.2166;4.6979455;0.235955;0.0158072;30.432450000000003;14.379010000000001;36.5565;27.7022;25.46343333333333;0.0781713;38.44015;40.5617;36.5276	20.2323;17.9119;0.105802;17.5606;18.0945;11.556399999999998;22.8112;2.6781043;0.0107916;6.31202E-5;20.409799999999997;5.44549525;23.4439;18.5771;17.215933333333336;1.15429E-7;24.11155;25.2495;23.0409	57.6531;42.88935;2.5E7;41.8713;42.0506;23.282066666666665;76.2381;250023.52665;2.5E7;500000.0;59.101;6375024.07585;81.9429;52.381;46.798966666666665;2.5E7;53.34895;101.866;84.1046	12	18	9	288444;94268;299626;29199;294270;246097;81613;25476;64558	1385620_at,1388898_at;1372844_at;1372016_at;1370772_a_at;1370382_at,1370383_s_at;1397221_s_at;1374620_at,1382975_at;1387027_a_at;1369468_at	20.2602	25.2726	14.6754	13.6567
GO:0001935	4	endothelial cell proliferation	19	20	1	1	1	0.95077	0.30389	0.30389	5	81707	Mmp14	1367860_a_at		37.5583	37.5583	37.5583		37.5583		23.9073	23.9073	23.9073		23.9073		86.4955	86.4955	86.4955		86.4955		0	37.5583			37.5583	23.9073	86.4955	0	1	0
GO:0001936	7	regulation of endothelial cell proliferation	121	123	1	1	1	0.34902	0.89322	0.72868	0.81	64535	Fgfbp1	1368349_at		6.26631	6.26631	6.26631		6.26631		4.08757	4.08757	4.08757		4.08757		13.9571	13.9571	13.9571		13.9571						6.26631	4.08757	13.9571	1	0	1	64535	1368349_at	6.26631	6.26631		4.08757
GO:0001938	8	positive regulation of endothelial cell proliferation	82	84	1	1	1	0.55354	0.78245	1	1.19	64535	Fgfbp1	1368349_at		6.26631	6.26631	6.26631		6.26631		4.08757	4.08757	4.08757		4.08757		13.9571	13.9571	13.9571		13.9571						6.26631	4.08757	13.9571	1	0	1	64535	1368349_at	6.26631	6.26631		4.08757
GO:0001942	4	hair follicle development	35	36	1	1	1	0.86412	0.47924	0.47924	2.78	29200	Inhba	1369012_at,1383486_at		38.4402	38.4402	38.4402		38.4401		24.1116	24.1116	24.1116		24.1115		53.349	53.349	53.349		53.349						38.4402	24.1116	53.349	0	2	0
GO:0001944	5	vasculature development	43	44	1	1	1	0.81352	0.54964	0.54964	2.27	25426	Cyp1b1	1368990_at		27.2489	27.2489	27.2489		27.2489		18.7215	18.7215	18.7215		18.7215		49.2941	49.2941	49.2941		49.2941						27.2489	18.7215	49.2941	1	0	1	25426	1368990_at	27.2489	27.2489		18.7215
GO:0001952	6	regulation of cell-matrix adhesion	88	95	3	3	3	0.90873	0.24277	0.24277	3.16	116548;116683;81707	Pcsk5;Efna5;Mmp14	1392773_at;1375647_at;1367860_a_at	116548(-0.2018);116683(0.1685)	29.9271	27.7022	24.5208	6.79755	25.6781	4.00994	19.8885	18.5771	17.1812	3.54965	17.7546	2.05264	60.3301	52.381	42.1138	23.2341	45.9991	13.6108					24.5208;27.7022;37.5583	17.1812;18.5771;23.9073	42.1138;52.381;86.4955	1	2	1	116548	1392773_at	24.5208	24.5208		17.1812
GO:0001953	7	negative regulation of cell-matrix adhesion	31	32	1	1	1	0.88805	0.44003	0.44003	3.12	81707	Mmp14	1367860_a_at		37.5583	37.5583	37.5583		37.5583		23.9073	23.9073	23.9073		23.9073		86.4955	86.4955	86.4955		86.4955						37.5583	23.9073	86.4955	0	1	0
GO:0001954	7	positive regulation of cell-matrix adhesion	40	46	1	1	1	0.80048	0.5657	0.5657	2.17	116548	Pcsk5	1392773_at	116548(-0.2018)	24.5208	24.5208	24.5208		24.5208		17.1812	17.1812	17.1812		17.1812		42.1138	42.1138	42.1138		42.1138						24.5208	17.1812	42.1138	1	0	1	116548	1392773_at	24.5208	24.5208		17.1812
GO:0001958	5	endochondral ossification	27	28	1	1	1	0.91069	0.39788	0.39788	3.57	81707	Mmp14	1367860_a_at		37.5583	37.5583	37.5583		37.5583		23.9073	23.9073	23.9073		23.9073		86.4955	86.4955	86.4955		86.4955						37.5583	23.9073	86.4955	0	1	0
GO:0001959	6	regulation of cytokine-mediated signaling pathway	88	89	1	1	1	0.52372	0.80139	1	1.12	360481	Dnaja3	1378392_at		31.2133	31.2133	31.2133		31.2133		20.8292	20.8292	20.8292		20.8292		61.4029	61.4029	61.4029		61.4029						31.2133	20.8292	61.4029	1	0	1	360481	1378392_at	31.2133	31.2133		20.8292
GO:0001960	7	negative regulation of cytokine-mediated signaling pathway	42	42	1	1	1	0.82644	0.53298	0.53298	2.38	360481	Dnaja3	1378392_at		31.2133	31.2133	31.2133		31.2133		20.8292	20.8292	20.8292		20.8292		61.4029	61.4029	61.4029		61.4029						31.2133	20.8292	61.4029	1	0	1	360481	1378392_at	31.2133	31.2133		20.8292
GO:0001963	8	synaptic transmission, dopaminergic	14	14	1	1	1	0.97471	0.22393	0.22393	7.14	171099	Rasd2	1370372_at		9.25174	9.25174	9.25174		9.25174		5.46159	5.46159	5.46159		5.46159		27.386	27.386	27.386		27.386		0	9.25174			9.25174	5.46159	27.386	0	1	0
GO:0001973	7	adenosine receptor signaling pathway	7	9	1	1	1	0.98939	0.15036	0.15036	11.11	81664	Gnai2	1367844_at		40.5617	40.5617	40.5617		40.5617		25.2495	25.2495	25.2495		25.2495		101.866	101.866	101.866		101.866		0	40.5617	0	40.5617	40.5617	25.2495	101.866	0	1	0
GO:0001974	4	blood vessel remodeling	39	41	1	1	1	0.83284	0.52442	0.52442	2.44	25690	Ahr	1369146_a_at		0.487373	0.487373	0.487373		0.487373		0.0641274	0.0641274	0.0641274		0.0641274		25000000	25000000	25000000		25000000						0.487373	0.0641274	25000000	1	0	1	25690	1369146_a_at	0.487373	0.487373		0.0641274
GO:0002001	6	renin secretion into blood stream	2	2	1	1	1	0.99968	0.035551	0.035551	50	116548	Pcsk5	1392773_at	116548(-0.2018)	24.5208	24.5208	24.5208		24.5208		17.1812	17.1812	17.1812		17.1812		42.1138	42.1138	42.1138		42.1138		0	24.5208	0	24.5208	24.5208	17.1812	42.1138	1	0	1	116548	1392773_at	24.5208	24.5208		17.1812
GO:0002002	5	regulation of angiotensin levels in blood	2	2	1	0	0	0.96445	1	1	0																														0	0	0
GO:0002009	5	morphogenesis of an epithelium	283	292	4	4	4	0.39564	0.77258	0.82205	1.37	25697;60628;25690;81707	Ctsl;Cxcr4;Ahr;Mmp14	1370244_at;1389244_x_at;1369146_a_at;1367860_a_at		9.60018	0.361664	0.119104	18.6394	1.32577	6.92595	6.00498	0.0509185	0.0107916	11.9349	0.680137	4.43848	1.25e+07	1.25e+07	4.56418	1.44337e+07	1.8424e+07	1.27099e+07					0.119104;0.235955;0.487373;37.5583	0.0377096;0.0107916;0.0641274;23.9073	4.56418;2.5E7;2.5E7;86.4955	2	2	2	25697;25690	1370244_at;1369146_a_at	0.303239	0.303239	0.260406	0.0509185
GO:0002027	6	regulation of heart rate	89	90	1	1	1	0.51788	0.80498	1	1.11	29686	Scn1b	1387010_s_at		0.288393	0.288393	0.288393		0.288393		0.057104	0.057104	0.057104		0.057104		500000	500000	500000		500000						0.288393	0.057104	500000	0	1	0
GO:0002028	8	regulation of sodium ion transport	85	87	2	2	2	0.79497	0.46447	0.67045	2.3	29686;64045	Scn1b;Glrx	1387010_s_at;1367705_at,1386908_at		7.95618	7.95618	0.288393	10.8439	6.80481	10.7209	4.90406	4.90406	0.057104	6.85463	4.17626	6.77691	250015	250015	29.5428	353533	287552	349524					0.288393;15.623975	0.057104;9.751014999999999	500000.0;29.54275	2	1	1	64045	1367705_at,1386908_at	15.624	15.624		9.75101
GO:0002040	5	sprouting angiogenesis	27	27	1	1	1	0.91611	0.38686	0.38686	3.7	303735	Rnf213	1374337_at		29.6021	29.6021	29.6021		29.6021		19.9907	19.9907	19.9907		19.9907		56.2131	56.2131	56.2131		56.2131						29.6021	19.9907	56.2131	1	0	1	303735	1374337_at	29.6021	29.6021		19.9907
GO:0002042	9	cell migration involved in sprouting angiogenesis	15	15	1	1	1	0.97116	0.23786	0.23786	6.67	291132	Gpld1	1380833_at		9.29434	9.29434	9.29434		9.29434		4.33067	4.33067	4.33067		4.33067		24.0279	24.0279	24.0279		24.0279		0	9.29434			9.29434	4.33067	24.0279	0	1	0
GO:0002062	5	chondrocyte differentiation	41	41	1	1	1	0.83284	0.52442	0.52442	2.44	291132	Gpld1	1380833_at		9.29434	9.29434	9.29434		9.29434		4.33067	4.33067	4.33067		4.33067		24.0279	24.0279	24.0279		24.0279						9.29434	4.33067	24.0279	0	1	0
GO:0002064	5	epithelial cell development	121	127	3	2	2	0.60091	0.66819	1	1.57	310670;60628	Adamtsl4;Cxcr4	1372426_at;1389244_x_at		17.6785	17.6785	0.235955	24.6675	14.2187	24.1774	11.1698	11.1698	0.0107916	15.7813	8.9564	15.4677	1.25e+07	1.25e+07	78.3307	1.76776e+07	1.49795e+07	1.73264e+07					35.1211;0.235955	22.3289;0.0107916	78.3307;2.5E7	0	2	0
GO:0002065	6	columnar/cuboidal epithelial cell differentiation	49	56	1	0	0	0.36213	1	0.62799	0																														0	0	0
GO:0002067	7	glandular epithelial cell differentiation	19	22	1	0	0	0.67133	1	1	0																														0	0	0
GO:0002082	7	regulation of oxidative phosphorylation	24	25	1	1	1	0.92663	0.36422	0.36422	4	299857	Shmt2	1388695_at		7.86658	7.86658	7.86658		7.86658		2.76025	2.76025	2.76025		2.76025		20.2174	20.2174	20.2174		20.2174						7.86658	2.76025	20.2174	1	0	1	299857	1388695_at	7.86658	7.86658		2.76025
GO:0002138	7	retinoic acid biosynthetic process	7	9	1	1	1	0.98939	0.15036	0.15036	11.11	24296	Cyp1a1	1370269_at		0.140946	0.140946	0.140946		0.140946		0.0512492	0.0512492	0.0512492		0.0512492		13.316	13.316	13.316		13.316		0	0.140946	0	0.140946	0.140946	0.0512492	13.316	1	0	1	24296	1370269_at	0.140946	0.140946		0.0512492
GO:0002218	7	activation of innate immune response	66	66	2	2	2	0.88505	0.33225	0.33225	3.03	297989;25476	Ddx58;Lgals9	1391463_at;1387027_a_at		28.0635	28.0635	19.5705	12.0109	31.0853	11.2249	18.8155	18.8155	14.1871	6.54555	20.4623	6.11722	56.4396	56.4396	30.9363	36.0671	65.5137	33.707					19.5705;36.5565	14.1871;23.4439	30.9363;81.9429	2	0	2	297989;25476	1391463_at;1387027_a_at	28.0635	28.0635	12.0109	18.8155
GO:0002221	8	pattern recognition receptor signaling pathway	49	49	2	2	2	0.94256	0.21928	0.21928	4.08	297989;25476	Ddx58;Lgals9	1391463_at;1387027_a_at		28.0635	28.0635	19.5705	12.0109	31.0853	11.2249	18.8155	18.8155	14.1871	6.54555	20.4623	6.11722	56.4396	56.4396	30.9363	36.0671	65.5137	33.707					19.5705;36.5565	14.1871;23.4439	30.9363;81.9429	2	0	2	297989;25476	1391463_at;1387027_a_at	28.0635	28.0635	12.0109	18.8155
GO:0002224	9	toll-like receptor signaling pathway	36	36	1	1	1	0.86412	0.47924	0.47924	2.78	25476	Lgals9	1387027_a_at		36.5565	36.5565	36.5565		36.5565		23.4439	23.4439	23.4439		23.4439		81.9429	81.9429	81.9429		81.9429						36.5565	23.4439	81.9429	1	0	1	25476	1387027_a_at	36.5565	36.5565		23.4439
GO:0002227	5	innate immune response in mucosa	11	17	2	2	2	0.99678	0.036494	0.036494	11.76	316010;25080	Camp;Apoa4	1393603_at;1368520_at		15.2555	15.2555	0.44934	20.939	12.8801	20.6678	10.1608	10.1608	0.0892025	14.2433	8.54497	14.0588	250029	250029	57.6531	353513	290132	348934	0	0.44934	0.5	15.2555	30.0616;0.44934	20.2323;0.0892025	57.6531;500000.0	1	1	1	25080	1368520_at	0.44934	0.44934		0.0892025
GO:0002228	5	natural killer cell mediated immunity	10	14	1	1	1	0.97471	0.22393	0.22393	7.14	29199	Hfe	1370772_a_at		35.2166	35.2166	35.2166		35.2166		22.8112	22.8112	22.8112		22.8112		76.2381	76.2381	76.2381		76.2381		0	35.2166			35.2166	22.8112	76.2381	1	0	1	29199	1370772_a_at	35.2166	35.2166		22.8112
GO:0002230	7	positive regulation of defense response to virus by host	20	20	1	1	1	0.95077	0.30389	0.30389	5	297989	Ddx58	1391463_at		19.5705	19.5705	19.5705		19.5705		14.1871	14.1871	14.1871		14.1871		30.9363	30.9363	30.9363		30.9363		0	19.5705			19.5705	14.1871	30.9363	1	0	1	297989	1391463_at	19.5705	19.5705		14.1871
GO:0002237	5	response to molecule of bacterial origin	361	383	15	15	15	0.9985	0.0038542	0.0047312	3.92	316010;245920;266685;24297;170496;81750;286954;170913;24296;246097;25476;140668;24614;25303;24484	Camp;Cxcl10;Ugt2b17;Cyp1a2;Lcn2;Pros1;Ugt2b1;Abcb1a;Cyp1a1;Fas;Lgals9;Abcc3;Orm1;Abcc2;Igfbp3	1393603_at;1387969_at;1387955_at;1387243_at;1387011_at;1371037_at;1370698_at;1370464_at,1370465_at;1370269_at;1397221_s_at;1387027_a_at;1369698_at;1368731_at;1368497_at;1367652_at		16.5098	7.57916	0.0158072	17.4716	15.3447	18.2941	9.81746	0.185991	6.31202e-05	11.2536	9.12451	11.4247	1.70003e+06	40.0585	0.270322	6.44703e+06	3.90477e+06	9.37408e+06					30.0616;0.324767;0.0619393;6.06621;39.4681;23.6793;0.0904144;2.461988;0.140946;0.0158072;36.5565;7.57916;47.8233;16.7895;36.5276	20.2323;0.0408567;0.0254314;0.185991;25.4163;16.6907;0.0374753;0.077203;0.0512492;6.31202E-5;23.4439;0.120481;25.5109;12.3882;23.0409	57.6531;2.5E7;0.270322;16.8801;92.3515;40.0585;0.594918;10.065059999999999;13.316;500000.0;81.9429;21.1976;49.603;25.4932;84.1046	14	2	13	245920;266685;24297;170496;81750;286954;170913;24296;246097;25476;140668;24614;25303	1387969_at;1387955_at;1387243_at;1387011_at;1371037_at;1370698_at;1370464_at,1370465_at;1370269_at;1397221_s_at;1387027_a_at;1369698_at;1368731_at;1368497_at	13.9275	6.06621	17.3266	7.99913
GO:0002244	5	hematopoietic progenitor cell differentiation	84	86	1	1	1	0.5415	0.79023	1	1.16	29200	Inhba	1369012_at,1383486_at		38.4402	38.4402	38.4402		38.4401		24.1116	24.1116	24.1116		24.1115		53.349	53.349	53.349		53.349						38.4402	24.1116	53.349	0	2	0
GO:0002250	4	adaptive immune response	111	122	4	4	4	0.93147	0.17609	0.17609	3.28	29199;294270;25697;246097	Hfe;RT1-Db1;Ctsl;Fas	1370772_a_at;1370382_at,1370383_s_at;1370244_at;1397221_s_at		10.0124	2.40852	0.0158072	16.9441	11.4611	17.7628	6.38177	1.35791	6.31202e-05	11.0245	7.32212	11.5635	187526	125050	4.56418	239338	122248	204270					35.2166;4.6979455;0.119104;0.0158072	22.8112;2.6781043;0.0377096;6.31202E-5	76.2381;250023.52665;4.56418;500000.0	5	0	4	29199;294270;25697;246097	1370772_a_at;1370382_at,1370383_s_at;1370244_at;1397221_s_at	10.0124	2.40852	16.9441	6.38177
GO:0002251	4	organ or tissue specific immune response	16	22	2	2	2	0.99318	0.058486	0.058486	9.09	316010;25080	Camp;Apoa4	1393603_at;1368520_at		15.2555	15.2555	0.44934	20.939	12.8801	20.6678	10.1608	10.1608	0.0892025	14.2433	8.54497	14.0588	250029	250029	57.6531	353513	290132	348934	0.5	15.2555			30.0616;0.44934	20.2323;0.0892025	57.6531;500000.0	1	1	1	25080	1368520_at	0.44934	0.44934		0.0892025
GO:0002252	3	immune effector process	280	310	11	11	11	0.98981	0.024239	0.027651	3.55	308097;297989;245920;25419;89843;298693;360733;192281;29199;294270;246097	Tagap;Ddx58;Cxcl10;Crp;Cxadr;Isg15;Rtp4;Oas1a;Hfe;RT1-Db1;Fas	1397958_at;1391463_at;1387969_at;1387830_at;1384816_at;1382314_at;1379285_at;1371152_a_at;1370772_a_at;1370382_at,1370383_s_at;1397221_s_at		17.888	20.2265	0.0158072	14.1423	16.3657	15.2335	12.0272	14.599	6.31202e-05	9.42109	10.8494	10.0809	4.61367e+06	76.2381	30.9363	1.00805e+07	8.25146e+06	1.22861e+07					35.1155;19.5705;0.324767;20.2265;22.8164;29.9319;0.292383;28.5593;35.2166;4.6979455;0.0158072	22.1522;14.1871;0.0408567;14.599;16.18;20.1643;0.0515247;19.4349;22.8112;2.6781043;6.31202E-5	79.2566;30.9363;2.5E7;32.2998;38.0215;57.2437;2.5E7;53.0563;76.2381;250023.52665;500000.0	11	1	10	297989;245920;25419;89843;298693;360733;192281;29199;294270;246097	1391463_at;1387969_at;1387830_at;1384816_at;1382314_at;1379285_at;1371152_a_at;1370772_a_at;1370382_at,1370383_s_at;1397221_s_at	16.1652	19.8985	13.6365	11.0147
GO:0002253	6	activation of immune response	180	194	5	5	5	0.86367	0.26901	0.40266	2.58	297989;25419;291132;361659;25476	Ddx58;Crp;Gpld1;Plekha1;Lgals9	1391463_at;1387830_at;1380833_at;1376762_at;1387027_a_at		21.7619	20.2265	9.29434	9.7908	20.2035	10.5554	14.5488	14.599	4.33067	6.82529	13.0943	7.74108	41.7708	32.2998	24.0279	23.1312	40.282	22.2779					19.5705;20.2265;9.29434;23.1615;36.5565	14.1871;14.599;4.33067;16.1835;23.4439	30.9363;32.2998;24.0279;39.6472;81.9429	3	2	3	297989;25419;25476	1391463_at;1387830_at;1387027_a_at	25.4512	20.2265	9.62309	17.41
GO:0002260	6	lymphocyte homeostasis	46	49	2	2	2	0.94256	0.21928	0.21928	4.08	246097;25690	Fas;Ahr	1397221_s_at;1369146_a_at		0.25159	0.25159	0.0158072	0.333447	0.416541	0.238264	0.0320953	0.0320953	6.31202e-05	0.0453003	0.0545045	0.0323692	12750000	12750000	500000	1.73241e+07	2.13199e+07	1.23789e+07					0.0158072;0.487373	6.31202E-5;0.0641274	500000.0;2.5E7	2	0	2	246097;25690	1397221_s_at;1369146_a_at	0.25159	0.25159	0.333447	0.0320953
GO:0002347	4	response to tumor cell	7	7	1	1	1	0.99366	0.11902	0.11902	14.29	117514	Txnip	1371131_a_at		28.4676	28.4676	28.4676		28.4676		19.3855	19.3855	19.3855		19.3855		52.7858	52.7858	52.7858		52.7858		0	28.4676	0	28.4676	28.4676	19.3855	52.7858	0	1	0
GO:0002376	2	immune system process	961	1040	24	24	24	0.9189	0.12063	0.18105	2.31	308097;316010;297989;245920;25419;25627;170496;89843;298693;291132;360733;360481;361659;192281;29199;294270;25697;60628;246097;24536;25476;25690;24614;25080	Tagap;Camp;Ddx58;Cxcl10;Crp;Cma1;Lcn2;Cxadr;Isg15;Gpld1;Rtp4;Dnaja3;Plekha1;Oas1a;Hfe;RT1-Db1;Ctsl;Cxcr4;Fas;Lepr;Lgals9;Ahr;Orm1;Apoa4	1397958_at;1393603_at;1391463_at;1387969_at;1387830_at;1387173_at;1387011_at;1384816_at;1382314_at;1380833_at;1379285_at;1378392_at;1376762_at;1371152_a_at;1370772_a_at;1370382_at,1370383_s_at;1370244_at;1389244_x_at;1397221_s_at;1370604_at,1370605_s_at,1371223_a_at,1388232_a_at;1387027_a_at;1369146_a_at;1368731_at;1368520_at	24536(-0.2274)	17.9181	19.8985	0.0158072	15.7476	16.0998	15.703	11.4122	14.393	2.85172e-09	10.1145	10.0189	10.0408	4.48441e+06	68.8205	0.117549	9.46059e+06	6.88122e+06	1.10613e+07					35.1155;30.0616;19.5705;0.324767;20.2265;0.01714575;39.4681;22.8164;29.9319;9.29434;0.292383;31.2133;23.1615;28.5593;35.2166;4.6979455;0.119104;0.235955;0.0158072;14.379010000000001;36.5565;0.487373;47.8233;0.44934	22.1522;20.2323;14.1871;0.0408567;14.599;2.85172E-9;25.4163;16.18;20.1643;4.33067;0.0515247;20.8292;16.1835;19.4349;22.8112;2.6781043;0.0377096;0.0107916;6.31202E-5;5.44549525;23.4439;0.0641274;25.5109;0.0892025	79.2566;57.6531;30.9363;2.5E7;32.2998;0.1175485;92.3515;38.0215;57.2437;24.0279;2.5E7;61.4029;39.6472;53.0563;76.2381;250023.52665;4.56418;2.5E7;500000.0;6375024.07585;81.9429;2.5E7;49.603;500000.0	18	10	17	297989;245920;25419;170496;89843;298693;360733;360481;192281;29199;294270;25697;246097;25476;25690;24614;25080	1391463_at;1387969_at;1387830_at;1387011_at;1384816_at;1382314_at;1379285_at;1378392_at;1371152_a_at;1370772_a_at;1370382_at,1370383_s_at;1370244_at;1397221_s_at;1387027_a_at;1369146_a_at;1368731_at;1368520_at	18.6923	20.2265	16.7757	12.0905
GO:0002377	4	immunoglobulin production	10	11	2	2	2	0.99916	0.015834	0.015834	18.18	294270;246097	RT1-Db1;Fas	1370382_at,1370383_s_at;1397221_s_at		2.35688	2.35688	0.0158072	3.31077	3.08166	3.14811	1.33908	1.33908	6.31202e-05	1.89366	1.75364	1.80062	375012	375012	250024	176760	336316	168076	0	0.0158072	0.5	2.35688	4.6979455;0.0158072	2.6781043;6.31202E-5	250023.52665;500000.0	3	0	2	294270;246097	1370382_at,1370383_s_at;1397221_s_at	2.35688	2.35688	3.31077	1.33908
GO:0002381	5	immunoglobulin production involved in immunoglobulin mediated immune response	3	4	1	1	1	0.99812	0.069844	0.069844	25	294270	RT1-Db1	1370382_at,1370383_s_at		4.69795	4.69795	4.69795		4.69795		2.6781	2.6781	2.6781		2.6781		250024	250024	250024		250024		0	4.69795	0	4.69795	4.69795	2.6781	250024	2	0	1	294270	1370382_at,1370383_s_at	4.69795	4.69795		2.6781
GO:0002385	5	mucosal immune response	15	21	2	2	2	0.99403	0.053788	0.053788	9.52	316010;25080	Camp;Apoa4	1393603_at;1368520_at		15.2555	15.2555	0.44934	20.939	12.8801	20.6678	10.1608	10.1608	0.0892025	14.2433	8.54497	14.0588	250029	250029	57.6531	353513	290132	348934	0.5	15.2555			30.0616;0.44934	20.2323;0.0892025	57.6531;500000.0	1	1	1	25080	1368520_at	0.44934	0.44934		0.0892025
GO:0002429	7	immune response-activating cell surface receptor signaling pathway	94	101	2	2	2	0.72823	0.5437	0.70327	1.98	291132;361659	Gpld1;Plekha1	1380833_at;1376762_at		16.2279	16.2279	9.29434	9.80556	16.1835	9.80536	10.2571	10.2571	4.33067	8.38122	10.2192	8.38104	31.8376	31.8376	24.0279	11.0445	31.7876	11.0443					9.29434;23.1615	4.33067;16.1835	24.0279;39.6472	0	2	0
GO:0002430	8	complement receptor mediated signaling pathway	4	4	1	1	1	0.99812	0.069844	0.069844	25	291132	Gpld1	1380833_at		9.29434	9.29434	9.29434		9.29434		4.33067	4.33067	4.33067		4.33067		24.0279	24.0279	24.0279		24.0279		0	9.29434	0	9.29434	9.29434	4.33067	24.0279	0	1	0
GO:0002437	4	inflammatory response to antigenic stimulus	33	38	2	2	2	0.9697	0.14823	0.14823	5.26	294270;24614	RT1-Db1;Orm1	1370382_at,1370383_s_at;1368731_at		26.2606	26.2606	4.69795	30.4942	30.7536	29.8249	14.0945	14.0945	2.6781	16.1452	16.4733	15.7909	125037	125037	49.603	176758	98993.5	172879	0.5	26.2606			4.6979455;47.8233	2.6781043;25.5109	250023.52665;49.603	3	0	2	294270;24614	1370382_at,1370383_s_at;1368731_at	26.2606	26.2606	30.4942	14.0945
GO:0002438	5	acute inflammatory response to antigenic stimulus	12	14	1	1	1	0.97471	0.22393	0.22393	7.14	24614	Orm1	1368731_at		47.8233	47.8233	47.8233		47.8233		25.5109	25.5109	25.5109		25.5109		49.603	49.603	49.603		49.603		0	47.8233			47.8233	25.5109	49.603	1	0	1	24614	1368731_at	47.8233	47.8233		25.5109
GO:0002439	5	chronic inflammatory response to antigenic stimulus	5	5	1	1	1	0.99691	0.086532	0.086532	20	24614	Orm1	1368731_at		47.8233	47.8233	47.8233		47.8233		25.5109	25.5109	25.5109		25.5109		49.603	49.603	49.603		49.603		0	47.8233	0	47.8233	47.8233	25.5109	49.603	1	0	1	24614	1368731_at	47.8233	47.8233		25.5109
GO:0002440	3	production of molecular mediator of immune response	26	27	2	2	2	0.98787	0.083888	0.083888	7.41	294270;246097	RT1-Db1;Fas	1370382_at,1370383_s_at;1397221_s_at		2.35688	2.35688	0.0158072	3.31077	3.08166	3.14811	1.33908	1.33908	6.31202e-05	1.89366	1.75364	1.80062	375012	375012	250024	176760	336316	168076	0.5	2.35688			4.6979455;0.0158072	2.6781043;6.31202E-5	250023.52665;500000.0	3	0	2	294270;246097	1370382_at,1370383_s_at;1397221_s_at	2.35688	2.35688	3.31077	1.33908
GO:0002443	4	leukocyte mediated immunity	62	73	3	3	3	0.958	0.1431	0.1431	4.11	29199;294270;246097	Hfe;RT1-Db1;Fas	1370772_a_at;1370382_at,1370383_s_at;1397221_s_at		13.3101	4.69795	0.0158072	19.1155	17.4114	19.6681	8.49646	2.6781	6.31202e-05	12.469	11.1437	12.8719	250033	250024	76.2381	249962	186379	231603					35.2166;4.6979455;0.0158072	22.8112;2.6781043;6.31202E-5	76.2381;250023.52665;500000.0	4	0	3	29199;294270;246097	1370772_a_at;1370382_at,1370383_s_at;1397221_s_at	13.3101	4.69795	19.1155	8.49646
GO:0002449	5	lymphocyte mediated immunity	51	61	3	3	3	0.97627	0.096295	0.096295	4.92	29199;294270;246097	Hfe;RT1-Db1;Fas	1370772_a_at;1370382_at,1370383_s_at;1397221_s_at		13.3101	4.69795	0.0158072	19.1155	17.4114	19.6681	8.49646	2.6781	6.31202e-05	12.469	11.1437	12.8719	250033	250024	76.2381	249962	186379	231603					35.2166;4.6979455;0.0158072	22.8112;2.6781043;6.31202E-5	76.2381;250023.52665;500000.0	4	0	3	29199;294270;246097	1370772_a_at;1370382_at,1370383_s_at;1397221_s_at	13.3101	4.69795	19.1155	8.49646
GO:0002455	6	humoral immune response mediated by circulating immunoglobulin	5	6	1	1	1	0.99542	0.10292	0.10292	16.67	294270	RT1-Db1	1370382_at,1370383_s_at		4.69795	4.69795	4.69795		4.69795		2.6781	2.6781	2.6781		2.6781		250024	250024	250024		250024		0	4.69795	0	4.69795	4.69795	2.6781	250024	2	0	1	294270	1370382_at,1370383_s_at	4.69795	4.69795		2.6781
GO:0002456	6	T cell mediated immunity	24	25	1	1	1	0.92663	0.36422	0.36422	4	29199	Hfe	1370772_a_at		35.2166	35.2166	35.2166		35.2166		22.8112	22.8112	22.8112		22.8112		76.2381	76.2381	76.2381		76.2381						35.2166	22.8112	76.2381	1	0	1	29199	1370772_a_at	35.2166	35.2166		22.8112
GO:0002460	5	adaptive immune response based on somatic recombination of immune receptors built from immunoglobulin superfamily domains	58	66	3	3	3	0.9694	0.11495	0.11495	4.55	29199;294270;246097	Hfe;RT1-Db1;Fas	1370772_a_at;1370382_at,1370383_s_at;1397221_s_at		13.3101	4.69795	0.0158072	19.1155	17.4114	19.6681	8.49646	2.6781	6.31202e-05	12.469	11.1437	12.8719	250033	250024	76.2381	249962	186379	231603					35.2166;4.6979455;0.0158072	22.8112;2.6781043;6.31202E-5	76.2381;250023.52665;500000.0	4	0	3	29199;294270;246097	1370772_a_at;1370382_at,1370383_s_at;1397221_s_at	13.3101	4.69795	19.1155	8.49646
GO:0002478	5	antigen processing and presentation of exogenous peptide antigen	15	21	1	1	1	0.94621	0.31639	0.31639	4.76	294270	RT1-Db1	1370382_at,1370383_s_at		4.69795	4.69795	4.69795		4.69795		2.6781	2.6781	2.6781		2.6781		250024	250024	250024		250024						4.69795	2.6781	250024	2	0	1	294270	1370382_at,1370383_s_at	4.69795	4.69795		2.6781
GO:0002495	5	antigen processing and presentation of peptide antigen via MHC class II	11	15	1	1	1	0.97116	0.23786	0.23786	6.67	294270	RT1-Db1	1370382_at,1370383_s_at		4.69795	4.69795	4.69795		4.69795		2.6781	2.6781	2.6781		2.6781		250024	250024	250024		250024		0	4.69795			4.69795	2.6781	250024	2	0	1	294270	1370382_at,1370383_s_at	4.69795	4.69795		2.6781
GO:0002501	7	peptide antigen assembly with MHC protein complex	3	5	1	1	1	0.99691	0.086532	0.086532	20	294270	RT1-Db1	1370382_at,1370383_s_at		4.69795	4.69795	4.69795		4.69795		2.6781	2.6781	2.6781		2.6781		250024	250024	250024		250024		0	4.69795	0	4.69795	4.69795	2.6781	250024	2	0	1	294270	1370382_at,1370383_s_at	4.69795	4.69795		2.6781
GO:0002503	8	peptide antigen assembly with MHC class II protein complex	2	4	1	1	1	0.99812	0.069844	0.069844	25	294270	RT1-Db1	1370382_at,1370383_s_at		4.69795	4.69795	4.69795		4.69795		2.6781	2.6781	2.6781		2.6781		250024	250024	250024		250024		0	4.69795	0	4.69795	4.69795	2.6781	250024	2	0	1	294270	1370382_at,1370383_s_at	4.69795	4.69795		2.6781
GO:0002504	4	antigen processing and presentation of peptide or polysaccharide antigen via MHC class II	12	16	1	1	1	0.96742	0.25155	0.25155	6.25	294270	RT1-Db1	1370382_at,1370383_s_at		4.69795	4.69795	4.69795		4.69795		2.6781	2.6781	2.6781		2.6781		250024	250024	250024		250024		0	4.69795			4.69795	2.6781	250024	2	0	1	294270	1370382_at,1370383_s_at	4.69795	4.69795		2.6781
GO:0002506	7	polysaccharide assembly with MHC class II protein complex	2	2	1	1	1	0.99968	0.035551	0.035551	50	294270	RT1-Db1	1370382_at,1370383_s_at		4.69795	4.69795	4.69795		4.69795		2.6781	2.6781	2.6781		2.6781		250024	250024	250024		250024		0	4.69795	0	4.69795	4.69795	2.6781	250024	2	0	1	294270	1370382_at,1370383_s_at	4.69795	4.69795		2.6781
GO:0002507	3	tolerance induction	9	10	1	1	1	0.98689	0.16561	0.16561	10	25476	Lgals9	1387027_a_at		36.5565	36.5565	36.5565		36.5565		23.4439	23.4439	23.4439		23.4439		81.9429	81.9429	81.9429		81.9429		0	36.5565	0	36.5565	36.5565	23.4439	81.9429	1	0	1	25476	1387027_a_at	36.5565	36.5565		23.4439
GO:0002519	4	natural killer cell tolerance induction	1	1	1	1	1	1	0.017936	0.017936	100	25476	Lgals9	1387027_a_at		36.5565	36.5565	36.5565		36.5565		23.4439	23.4439	23.4439		23.4439		81.9429	81.9429	81.9429		81.9429		0	36.5565	0	36.5565	36.5565	23.4439	81.9429	1	0	1	25476	1387027_a_at	36.5565	36.5565		23.4439
GO:0002521	5	leukocyte differentiation	235	247	5	5	5	0.71669	0.45611	0.63237	2.02	297096;360481;363465;24536;25476	Snx10;Dnaja3;Pir;Lepr;Lgals9	1383585_s_at;1378392_at;1377662_at;1370604_at,1370605_s_at,1371223_a_at,1388232_a_at;1387027_a_at	24536(-0.2274)	24.0073	20.0689	14.379	9.43294	21.7172	8.70332	15.4566	14.5005	5.4455	7.06263	14.0037	6.63766	1.27505e+06	61.4029	27.4474	2.85097e+06	1.44213e+06	2.98196e+06					20.0689;31.2133;17.8188;14.379010000000001;36.5565	14.5005;20.8292;13.0639;5.44549525;23.4439	31.9693;61.4029;27.4474;6375024.07585;81.9429	4	4	4	297096;360481;363465;25476	1383585_s_at;1378392_at;1377662_at;1387027_a_at	26.4144	25.6411	8.94504	17.9594
GO:0002526	6	acute inflammatory response	69	80	4	4	4	0.98562	0.055494	0.055494	5	25419;29199;24614;100912108	Crp;Hfe;Orm1;Nupr1	1387830_at;1370772_a_at;1368731_at;1367847_at		34.7443	35.4637	20.2265	11.2987	37.698	9.53628	21.3787	22.7024	14.599	4.71054	22.6929	3.58274	59.7644	62.9205	32.2998	22.9228	64.6269	20.1609	3	47.8233			20.2265;35.2166;47.8233;35.7108	14.599;22.8112;25.5109;22.5936	32.2998;76.2381;49.603;80.9168	3	1	3	25419;29199;24614	1387830_at;1370772_a_at;1368731_at	34.4221	35.2166	13.8155	20.9737
GO:0002544	6	chronic inflammatory response	15	16	1	1	1	0.96742	0.25155	0.25155	6.25	24614	Orm1	1368731_at		47.8233	47.8233	47.8233		47.8233		25.5109	25.5109	25.5109		25.5109		49.603	49.603	49.603		49.603		0	47.8233			47.8233	25.5109	49.603	1	0	1	24614	1368731_at	47.8233	47.8233		25.5109
GO:0002573	6	myeloid leukocyte differentiation	85	90	3	3	3	0.92166	0.21903	0.21903	3.33	297096;363465;25476	Snx10;Pir;Lgals9	1383585_s_at;1377662_at;1387027_a_at		24.8147	20.0689	17.8188	10.2307	22.9533	9.29751	17.0028	14.5005	13.0639	5.62424	15.9708	5.12243	47.1199	31.9693	27.4474	30.2423	41.7144	27.3731					20.0689;17.8188;36.5565	14.5005;13.0639;23.4439	31.9693;27.4474;81.9429	3	0	3	297096;363465;25476	1383585_s_at;1377662_at;1387027_a_at	24.8147	20.0689	10.2307	17.0028
GO:0002577	5	regulation of antigen processing and presentation	8	9	1	1	1	0.98939	0.15036	0.15036	11.11	29199	Hfe	1370772_a_at		35.2166	35.2166	35.2166		35.2166		22.8112	22.8112	22.8112		22.8112		76.2381	76.2381	76.2381		76.2381		0	35.2166	0	35.2166	35.2166	22.8112	76.2381	1	0	1	29199	1370772_a_at	35.2166	35.2166		22.8112
GO:0002578	6	negative regulation of antigen processing and presentation	1	1	1	1	1	1	0.017936	0.017936	100	29199	Hfe	1370772_a_at		35.2166	35.2166	35.2166		35.2166		22.8112	22.8112	22.8112		22.8112		76.2381	76.2381	76.2381		76.2381		0	35.2166	0	35.2166	35.2166	22.8112	76.2381	1	0	1	29199	1370772_a_at	35.2166	35.2166		22.8112
GO:0002583	6	regulation of antigen processing and presentation of peptide antigen	4	4	1	1	1	0.99812	0.069844	0.069844	25	29199	Hfe	1370772_a_at		35.2166	35.2166	35.2166		35.2166		22.8112	22.8112	22.8112		22.8112		76.2381	76.2381	76.2381		76.2381		0	35.2166	0	35.2166	35.2166	22.8112	76.2381	1	0	1	29199	1370772_a_at	35.2166	35.2166		22.8112
GO:0002584	7	negative regulation of antigen processing and presentation of peptide antigen	1	1	1	1	1	1	0.017936	0.017936	100	29199	Hfe	1370772_a_at		35.2166	35.2166	35.2166		35.2166		22.8112	22.8112	22.8112		22.8112		76.2381	76.2381	76.2381		76.2381		0	35.2166	0	35.2166	35.2166	22.8112	76.2381	1	0	1	29199	1370772_a_at	35.2166	35.2166		22.8112
GO:0002589	7	regulation of antigen processing and presentation of peptide antigen via MHC class I	2	2	1	1	1	0.99968	0.035551	0.035551	50	29199	Hfe	1370772_a_at		35.2166	35.2166	35.2166		35.2166		22.8112	22.8112	22.8112		22.8112		76.2381	76.2381	76.2381		76.2381		0	35.2166	0	35.2166	35.2166	22.8112	76.2381	1	0	1	29199	1370772_a_at	35.2166	35.2166		22.8112
GO:0002590	8	negative regulation of antigen processing and presentation of peptide antigen via MHC class I	1	1	1	1	1	1	0.017936	0.017936	100	29199	Hfe	1370772_a_at		35.2166	35.2166	35.2166		35.2166		22.8112	22.8112	22.8112		22.8112		76.2381	76.2381	76.2381		76.2381		0	35.2166	0	35.2166	35.2166	22.8112	76.2381	1	0	1	29199	1370772_a_at	35.2166	35.2166		22.8112
GO:0002625	6	regulation of T cell antigen processing and presentation	1	1	1	1	1	1	0.017936	0.017936	100	29199	Hfe	1370772_a_at		35.2166	35.2166	35.2166		35.2166		22.8112	22.8112	22.8112		22.8112		76.2381	76.2381	76.2381		76.2381		0	35.2166	0	35.2166	35.2166	22.8112	76.2381	1	0	1	29199	1370772_a_at	35.2166	35.2166		22.8112
GO:0002626	7	negative regulation of T cell antigen processing and presentation	1	1	1	1	1	1	0.017936	0.017936	100	29199	Hfe	1370772_a_at		35.2166	35.2166	35.2166		35.2166		22.8112	22.8112	22.8112		22.8112		76.2381	76.2381	76.2381		76.2381		0	35.2166	0	35.2166	35.2166	22.8112	76.2381	1	0	1	29199	1370772_a_at	35.2166	35.2166		22.8112
GO:0002637	7	regulation of immunoglobulin production	58	59	1	1	1	0.71414	0.65709	1	1.69	81613	Ceacam1	1374620_at,1382975_at		30.4324	30.4324	30.4324		30.4324		20.4098	20.4098	20.4098		20.4098		59.101	59.101	59.101		59.101						30.4324	20.4098	59.101	2	0	1	81613	1374620_at,1382975_at	30.4324	30.4324		20.4098
GO:0002639	8	positive regulation of immunoglobulin production	43	44	1	1	1	0.81352	0.54964	0.54964	2.27	81613	Ceacam1	1374620_at,1382975_at		30.4324	30.4324	30.4324		30.4324		20.4098	20.4098	20.4098		20.4098		59.101	59.101	59.101		59.101						30.4324	20.4098	59.101	2	0	1	81613	1374620_at,1382975_at	30.4324	30.4324		20.4098
GO:0002682	4	regulation of immune system process	924	990	25	24	24	0.94852	0.08029	0.13279	2.42	297989;245920;25419;303538;298693;311021;291132;360481;361730;361659;313278;296654;29199;291671;294270;246097;81613;25476;25690;29200;24614;81813;81707;83619	Ddx58;Cxcl10;Crp;Dhx58;Isg15;Nmi;Gpld1;Dnaja3;Dak;Plekha1;Ptprd;Gsn;Hfe;Hspa9;RT1-Db1;Fas;Ceacam1;Lgals9;Ahr;Inhba;Orm1;Klf10;Mmp14;Nfe2l2	1391463_at;1387969_at;1387830_at;1385276_a_at;1382314_at;1381875_at;1380833_at;1378392_at;1377048_at;1376762_at;1376619_at;1371414_at;1370772_a_at;1389930_at;1370382_at,1370383_s_at;1397221_s_at;1374620_at,1382975_at;1387027_a_at;1369146_a_at;1369012_at,1383486_at;1368731_at;1368650_at;1367860_a_at;1367826_at	313278(-0.121)	20.943	25.6264	0.0158072	15.734	18.1056	15.7149	13.3647	17.6828	2.85172e-09	10.1409	11.4712	10.2118	3.15629e+06	60.0458	0.117549	8.43445e+06	5.99122e+06	1.08842e+07					19.5705;0.324767;20.2265;32.0559;29.9319;0.230619;9.29434;31.2133;28.0913;23.1615;37.1251;0.530685;35.2166;0.01714575;4.6979455;0.0158072;30.432450000000003;36.5565;0.487373;38.44015;47.8233;31.0897;37.5583;8.54018	14.1871;0.0408567;14.599;21.2581;20.1643;0.0445238;4.33067;20.8292;19.1821;16.1835;23.7079;0.0822551;22.8112;2.85172E-9;2.6781043;6.31202E-5;20.409799999999997;23.4439;0.0641274;24.11155;25.5109;20.7657;23.9073;2.44081	30.9363;2.5E7;32.2998;64.2812;57.2437;2.5E7;24.0279;61.4029;51.6873;39.6472;84.495;21.0222;76.2381;0.1175485;250023.52665;500000.0;59.101;81.9429;2.5E7;53.34895;49.603;60.9906;86.4955;23.1149	18	9	16	297989;245920;25419;303538;298693;311021;360481;29199;291671;294270;246097;81613;25476;25690;24614;83619	1391463_at;1387969_at;1387830_at;1385276_a_at;1382314_at;1381875_at;1378392_at;1370772_a_at;1389930_at;1370382_at,1370383_s_at;1397221_s_at;1374620_at,1382975_at;1387027_a_at;1369146_a_at;1368731_at;1367826_at	18.5838	19.8985	16.4304	11.7801
GO:0002683	5	negative regulation of immune system process	342	362	11	11	11	0.96975	0.061895	0.10188	3.04	303538;311021;360481;361730;29199;291671;294270;246097;81613;25476;83619	Dhx58;Nmi;Dnaja3;Dak;Hfe;Hspa9;RT1-Db1;Fas;Ceacam1;Lgals9;Nfe2l2	1385276_a_at;1381875_at;1378392_at;1377048_at;1370772_a_at;1389930_at;1370382_at,1370383_s_at;1397221_s_at;1374620_at,1382975_at;1387027_a_at;1367826_at		18.8243	28.0913	0.0158072	15.7824	20.6843	15.0374	12.0998	19.1821	2.85172e-09	10.6907	13.3711	10.3008	2.34095e+06	64.2812	0.117549	7.51686e+06	4.36429e+06	9.90868e+06					32.0559;0.230619;31.2133;28.0913;35.2166;0.01714575;4.6979455;0.0158072;30.432450000000003;36.5565;8.54018	21.2581;0.0445238;20.8292;19.1821;22.8112;2.85172E-9;2.6781043;6.31202E-5;20.409799999999997;23.4439;2.44081	64.2812;2.5E7;61.4029;51.6873;76.2381;0.1175485;250023.52665;500000.0;59.101;81.9429;23.1149	12	1	10	303538;311021;360481;29199;291671;294270;246097;81613;25476;83619	1385276_a_at;1381875_at;1378392_at;1370772_a_at;1389930_at;1370382_at,1370383_s_at;1397221_s_at;1374620_at,1382975_at;1387027_a_at;1367826_at	17.8976	19.4863	16.3176	11.3916
GO:0002684	5	positive regulation of immune system process	615	662	15	15	15	0.86134	0.20977	0.36388	2.27	297989;245920;25419;303538;298693;291132;360481;361659;29199;294270;81613;25476;29200;81813;81707	Ddx58;Cxcl10;Crp;Dhx58;Isg15;Gpld1;Dnaja3;Plekha1;Hfe;RT1-Db1;Ceacam1;Lgals9;Inhba;Klf10;Mmp14	1391463_at;1387969_at;1387830_at;1385276_a_at;1382314_at;1380833_at;1378392_at;1376762_at;1370772_a_at;1370382_at,1370383_s_at;1374620_at,1382975_at;1387027_a_at;1369012_at,1383486_at;1368650_at;1367860_a_at		25.318	30.4324	0.324767	12.1814	21.9739	13.1178	16.648	20.4098	0.0408567	8.05304	14.3989	8.9473	1.68338e+06	60.9906	24.0279	6.45067e+06	3.45662e+06	8.91411e+06					19.5705;0.324767;20.2265;32.0559;29.9319;9.29434;31.2133;23.1615;35.2166;4.6979455;30.432450000000003;36.5565;38.44015;31.0897;37.5583	14.1871;0.0408567;14.599;21.2581;20.1643;4.33067;20.8292;16.1835;22.8112;2.6781043;20.409799999999997;23.4439;24.11155;20.7657;23.9073	30.9363;2.5E7;32.2998;64.2812;57.2437;24.0279;61.4029;39.6472;76.2381;250023.52665;59.101;81.9429;53.34895;60.9906;86.4955	12	6	10	297989;245920;25419;303538;298693;360481;29199;294270;81613;25476	1391463_at;1387969_at;1387830_at;1385276_a_at;1382314_at;1378392_at;1370772_a_at;1370382_at,1370383_s_at;1374620_at,1382975_at;1387027_a_at	24.0226	30.1822	12.6663	16.0422
GO:0002685	5	regulation of leukocyte migration	152	155	3	3	3	0.69715	0.5286	0.75846	1.94	245920;25476;81707	Cxcl10;Lgals9;Mmp14	1387969_at;1387027_a_at;1367860_a_at		24.8132	36.5565	0.324767	21.2135	12.6748	21.0842	15.7974	23.4439	0.0408567	13.6475	8.01107	13.6065	8.33339e+06	86.4955	81.9429	1.44337e+07	1.65048e+07	1.45023e+07					0.324767;36.5565;37.5583	0.0408567;23.4439;23.9073	2.5E7;81.9429;86.4955	2	1	2	245920;25476	1387969_at;1387027_a_at	18.4406	18.4406	25.6197	11.7424
GO:0002687	6	positive regulation of leukocyte migration	111	112	3	3	3	0.85798	0.32571	0.45626	2.68	245920;25476;81707	Cxcl10;Lgals9;Mmp14	1387969_at;1387027_a_at;1367860_a_at		24.8132	36.5565	0.324767	21.2135	12.6748	21.0842	15.7974	23.4439	0.0408567	13.6475	8.01107	13.6065	8.33339e+06	86.4955	81.9429	1.44337e+07	1.65048e+07	1.45023e+07					0.324767;36.5565;37.5583	0.0408567;23.4439;23.9073	2.5E7;81.9429;86.4955	2	1	2	245920;25476	1387969_at;1387027_a_at	18.4406	18.4406	25.6197	11.7424
GO:0002688	6	regulation of leukocyte chemotaxis	86	87	2	2	2	0.79497	0.46447	0.67045	2.3	245920;25476	Cxcl10;Lgals9	1387969_at;1387027_a_at		18.4406	18.4406	0.324767	25.6197	11.6878	23.7732	11.7424	11.7424	0.0408567	16.5485	7.38051	15.3558	1.25e+07	1.25e+07	81.9429	1.76776e+07	1.71595e+07	1.64035e+07					0.324767;36.5565	0.0408567;23.4439	2.5E7;81.9429	2	0	2	245920;25476	1387969_at;1387027_a_at	18.4406	18.4406	25.6197	11.7424
GO:0002690	7	positive regulation of leukocyte chemotaxis	69	69	2	2	2	0.87326	0.35189	0.35189	2.9	245920;25476	Cxcl10;Lgals9	1387969_at;1387027_a_at		18.4406	18.4406	0.324767	25.6197	11.6878	23.7732	11.7424	11.7424	0.0408567	16.5485	7.38051	15.3558	1.25e+07	1.25e+07	81.9429	1.76776e+07	1.71595e+07	1.64035e+07					0.324767;36.5565	0.0408567;23.4439	2.5E7;81.9429	2	0	2	245920;25476	1387969_at;1387027_a_at	18.4406	18.4406	25.6197	11.7424
GO:0002694	5	regulation of leukocyte activation	394	411	10	9	9	0.79561	0.31822	0.56712	2.19	360481;296654;29199;294270;246097;81613;25476;25690;81707	Dnaja3;Gsn;Hfe;RT1-Db1;Fas;Ceacam1;Lgals9;Ahr;Mmp14	1378392_at;1371414_at;1370772_a_at;1370382_at,1370383_s_at;1397221_s_at;1374620_at,1382975_at;1387027_a_at;1369146_a_at;1367860_a_at		19.6343	30.4324	0.0158072	17.4666	14.9669	17.1688	12.6918	20.4098	6.31202e-05	11.4531	9.65134	11.3454	2.86116e+06	81.9429	21.0222	8.30389e+06	6.42844e+06	1.15365e+07					31.2133;0.530685;35.2166;4.6979455;0.0158072;30.432450000000003;36.5565;0.487373;37.5583	20.8292;0.0822551;22.8112;2.6781043;6.31202E-5;20.409799999999997;23.4439;0.0641274;23.9073	61.4029;21.0222;76.2381;250023.52665;500000.0;59.101;81.9429;2.5E7;86.4955	9	2	7	360481;29199;294270;246097;81613;25476;25690	1378392_at;1370772_a_at;1370382_at,1370383_s_at;1397221_s_at;1374620_at,1382975_at;1387027_a_at;1369146_a_at	19.8029	30.4324	17.0989	12.8909
GO:0002695	6	negative regulation of leukocyte activation	138	143	5	5	5	0.95604	0.1147	0.1147	3.5	29199;294270;246097;81613;25476	Hfe;RT1-Db1;Fas;Ceacam1;Lgals9	1370772_a_at;1370382_at,1370383_s_at;1397221_s_at;1374620_at,1382975_at;1387027_a_at		21.3839	30.4324	0.0158072	17.5958	25.5033	15.4781	13.8686	20.4098	6.31202e-05	11.5326	16.6016	10.1773	150048	81.9429	59.101	223573	90487.5	180364					35.2166;4.6979455;0.0158072;30.432450000000003;36.5565	22.8112;2.6781043;6.31202E-5;20.409799999999997;23.4439	76.2381;250023.52665;500000.0;59.101;81.9429	7	0	5	29199;294270;246097;81613;25476	1370772_a_at;1370382_at,1370383_s_at;1397221_s_at;1374620_at,1382975_at;1387027_a_at	21.3839	30.4324	17.5958	13.8686
GO:0002696	6	positive regulation of leukocyte activation	245	256	4	4	4	0.51271	0.67791	1	1.56	360481;81613;25476;81707	Dnaja3;Ceacam1;Lgals9;Mmp14	1378392_at;1374620_at,1382975_at;1387027_a_at;1367860_a_at		33.9401	33.8849	30.4324	3.63666	32.9782	3.39906	22.1475	22.1365	20.4098	1.78279	21.6755	1.67748	72.2356	71.6729	59.101	13.9933	68.5214	12.8218					31.2133;30.432450000000003;36.5565;37.5583	20.8292;20.409799999999997;23.4439;23.9073	61.4029;59.101;81.9429;86.4955	4	1	3	360481;81613;25476	1378392_at;1374620_at,1382975_at;1387027_a_at	32.7341	31.2133	3.33325	21.561
GO:0002697	5	regulation of immune effector process	284	308	6	6	6	0.68389	0.47711	0.82584	1.95	297989;303538;361730;29199;81613;25476	Ddx58;Dhx58;Dak;Hfe;Ceacam1;Lgals9	1391463_at;1385276_a_at;1377048_at;1370772_a_at;1374620_at,1382975_at;1387027_a_at		30.3205	31.2442	19.5705	6.10599	30.9982	4.53935	20.2154	20.8339	14.1871	3.3375	20.6347	2.43521	60.6978	61.6911	30.9363	18.304	62.0142	14.2791					19.5705;32.0559;28.0913;35.2166;30.432450000000003;36.5565	14.1871;21.2581;19.1821;22.8112;20.409799999999997;23.4439	30.9363;64.2812;51.6873;76.2381;59.101;81.9429	6	1	5	297989;303538;29199;81613;25476	1391463_at;1385276_a_at;1370772_a_at;1374620_at,1382975_at;1387027_a_at	30.7664	32.0559	6.71662	20.422
GO:0002698	6	negative regulation of immune effector process	97	102	5	5	5	0.98994	0.036464	0.036464	4.9	303538;361730;29199;81613;25476	Dhx58;Dak;Hfe;Ceacam1;Lgals9	1385276_a_at;1377048_at;1370772_a_at;1374620_at,1382975_at;1387027_a_at		32.4706	32.0559	28.0913	3.45469	31.7744	3.32873	21.421	21.2581	19.1821	1.73828	21.0727	1.68144	66.6501	64.2812	51.6873	12.3722	64.1253	11.7998					32.0559;28.0913;35.2166;30.432450000000003;36.5565	21.2581;19.1821;22.8112;20.409799999999997;23.4439	64.2812;51.6873;76.2381;59.101;81.9429	5	1	4	303538;29199;81613;25476	1385276_a_at;1370772_a_at;1374620_at,1382975_at;1387027_a_at	33.5654	33.6362	2.81467	21.9807
GO:0002699	6	positive regulation of immune effector process	170	190	4	4	4	0.74461	0.4448	0.58629	2.11	303538;29199;81613;25476	Dhx58;Hfe;Ceacam1;Lgals9	1385276_a_at;1370772_a_at;1374620_at,1382975_at;1387027_a_at		33.5654	33.6362	30.4324	2.81467	33.1212	2.66622	21.9807	22.0346	20.4098	1.39291	21.764	1.31854	70.3908	70.2596	59.101	10.5266	68.6733	9.99097					32.0559;35.2166;30.432450000000003;36.5565	21.2581;22.8112;20.409799999999997;23.4439	64.2812;76.2381;59.101;81.9429	5	0	4	303538;29199;81613;25476	1385276_a_at;1370772_a_at;1374620_at,1382975_at;1387027_a_at	33.5654	33.6362	2.81467	21.9807
GO:0002700	6	regulation of production of molecular mediator of immune response	108	113	2	2	2	0.66937	0.60488	1	1.77	29199;81613	Hfe;Ceacam1	1370772_a_at;1374620_at,1382975_at		32.8245	32.8245	30.4324	3.3829	32.4863	3.34891	21.6105	21.6105	20.4098	1.69805	21.4407	1.68098	67.6696	67.6696	59.101	12.1178	66.4579	11.996					35.2166;30.432450000000003	22.8112;20.409799999999997	76.2381;59.101	3	0	2	29199;81613	1370772_a_at;1374620_at,1382975_at	32.8245	32.8245	3.3829	21.6105
GO:0002701	7	negative regulation of production of molecular mediator of immune response	28	29	1	1	1	0.90517	0.40871	0.40871	3.45	29199	Hfe	1370772_a_at		35.2166	35.2166	35.2166		35.2166		22.8112	22.8112	22.8112		22.8112		76.2381	76.2381	76.2381		76.2381						35.2166	22.8112	76.2381	1	0	1	29199	1370772_a_at	35.2166	35.2166		22.8112
GO:0002702	7	positive regulation of production of molecular mediator of immune response	74	78	1	1	1	0.59053	0.75732	1	1.28	81613	Ceacam1	1374620_at,1382975_at		30.4324	30.4324	30.4324		30.4324		20.4098	20.4098	20.4098		20.4098		59.101	59.101	59.101		59.101						30.4324	20.4098	59.101	2	0	1	81613	1374620_at,1382975_at	30.4324	30.4324		20.4098
GO:0002703	6	regulation of leukocyte mediated immunity	166	182	3	3	3	0.58731	0.63753	1	1.65	29199;81613;25476	Hfe;Ceacam1;Lgals9	1370772_a_at;1374620_at,1382975_at;1387027_a_at		34.0685	35.2166	30.4324	3.21941	33.75	3.33464	22.2216	22.8112	20.4098	1.60067	22.0627	1.65828	72.4273	76.2381	59.101	11.8882	71.2656	12.3053					35.2166;30.432450000000003;36.5565	22.8112;20.409799999999997;23.4439	76.2381;59.101;81.9429	4	0	3	29199;81613;25476	1370772_a_at;1374620_at,1382975_at;1387027_a_at	34.0685	35.2166	3.21941	22.2216
GO:0002704	7	negative regulation of leukocyte mediated immunity	43	46	3	3	3	0.99088	0.049181	0.049181	6.52	29199;81613;25476	Hfe;Ceacam1;Lgals9	1370772_a_at;1374620_at,1382975_at;1387027_a_at		34.0685	35.2166	30.4324	3.21941	33.75	3.33464	22.2216	22.8112	20.4098	1.60067	22.0627	1.65828	72.4273	76.2381	59.101	11.8882	71.2656	12.3053	1.5	35.8865			35.2166;30.432450000000003;36.5565	22.8112;20.409799999999997;23.4439	76.2381;59.101;81.9429	4	0	3	29199;81613;25476	1370772_a_at;1374620_at,1382975_at;1387027_a_at	34.0685	35.2166	3.21941	22.2216
GO:0002705	7	positive regulation of leukocyte mediated immunity	103	118	1	1	1	0.37152	0.883	0.72672	0.85	29199	Hfe	1370772_a_at		35.2166	35.2166	35.2166		35.2166		22.8112	22.8112	22.8112		22.8112		76.2381	76.2381	76.2381		76.2381						35.2166	22.8112	76.2381	1	0	1	29199	1370772_a_at	35.2166	35.2166		22.8112
GO:0002706	7	regulation of lymphocyte mediated immunity	119	133	3	3	3	0.78363	0.42791	0.51685	2.26	29199;81613;25476	Hfe;Ceacam1;Lgals9	1370772_a_at;1374620_at,1382975_at;1387027_a_at		34.0685	35.2166	30.4324	3.21941	33.75	3.33464	22.2216	22.8112	20.4098	1.60067	22.0627	1.65828	72.4273	76.2381	59.101	11.8882	71.2656	12.3053					35.2166;30.432450000000003;36.5565	22.8112;20.409799999999997;23.4439	76.2381;59.101;81.9429	4	0	3	29199;81613;25476	1370772_a_at;1374620_at,1382975_at;1387027_a_at	34.0685	35.2166	3.21941	22.2216
GO:0002707	8	negative regulation of lymphocyte mediated immunity	33	36	3	3	3	0.99621	0.026322	0.026322	8.33	29199;81613;25476	Hfe;Ceacam1;Lgals9	1370772_a_at;1374620_at,1382975_at;1387027_a_at		34.0685	35.2166	30.4324	3.21941	33.75	3.33464	22.2216	22.8112	20.4098	1.60067	22.0627	1.65828	72.4273	76.2381	59.101	11.8882	71.2656	12.3053	0.5	32.8245			35.2166;30.432450000000003;36.5565	22.8112;20.409799999999997;23.4439	76.2381;59.101;81.9429	4	0	3	29199;81613;25476	1370772_a_at;1374620_at,1382975_at;1387027_a_at	34.0685	35.2166	3.21941	22.2216
GO:0002708	8	positive regulation of lymphocyte mediated immunity	80	93	1	1	1	0.50058	0.81536	1	1.08	29199	Hfe	1370772_a_at		35.2166	35.2166	35.2166		35.2166		22.8112	22.8112	22.8112		22.8112		76.2381	76.2381	76.2381		76.2381						35.2166	22.8112	76.2381	1	0	1	29199	1370772_a_at	35.2166	35.2166		22.8112
GO:0002709	8	regulation of T cell mediated immunity	54	66	2	2	2	0.88505	0.33225	0.33225	3.03	29199;81613	Hfe;Ceacam1	1370772_a_at;1374620_at,1382975_at		32.8245	32.8245	30.4324	3.3829	32.4863	3.34891	21.6105	21.6105	20.4098	1.69805	21.4407	1.68098	67.6696	67.6696	59.101	12.1178	66.4579	11.996					35.2166;30.432450000000003	22.8112;20.409799999999997	76.2381;59.101	3	0	2	29199;81613	1370772_a_at;1374620_at,1382975_at	32.8245	32.8245	3.3829	21.6105
GO:0002710	9	negative regulation of T cell mediated immunity	14	14	2	2	2	0.99821	0.025291	0.025291	14.29	29199;81613	Hfe;Ceacam1	1370772_a_at;1374620_at,1382975_at		32.8245	32.8245	30.4324	3.3829	32.4863	3.34891	21.6105	21.6105	20.4098	1.69805	21.4407	1.68098	67.6696	67.6696	59.101	12.1178	66.4579	11.996	0	30.4324	0.5	32.8245	35.2166;30.432450000000003	22.8112;20.409799999999997	76.2381;59.101	3	0	2	29199;81613	1370772_a_at;1374620_at,1382975_at	32.8245	32.8245	3.3829	21.6105
GO:0002715	7	regulation of natural killer cell mediated immunity	30	34	3	3	3	0.99694	0.022642	0.022642	8.82	29199;81613;25476	Hfe;Ceacam1;Lgals9	1370772_a_at;1374620_at,1382975_at;1387027_a_at		34.0685	35.2166	30.4324	3.21941	33.75	3.33464	22.2216	22.8112	20.4098	1.60067	22.0627	1.65828	72.4273	76.2381	59.101	11.8882	71.2656	12.3053	0.5	32.8245			35.2166;30.432450000000003;36.5565	22.8112;20.409799999999997;23.4439	76.2381;59.101;81.9429	4	0	3	29199;81613;25476	1370772_a_at;1374620_at,1382975_at;1387027_a_at	34.0685	35.2166	3.21941	22.2216
GO:0002716	8	negative regulation of natural killer cell mediated immunity	11	14	2	2	2	0.99821	0.025291	0.025291	14.29	81613;25476	Ceacam1;Lgals9	1374620_at,1382975_at;1387027_a_at		33.4945	33.4945	30.4324	4.33036	33.1333	4.30013	21.9268	21.9268	20.4098	2.14543	21.7479	2.13046	70.522	70.522	59.101	16.1517	69.1748	16.0389	0	30.4324	0.5	33.4945	30.432450000000003;36.5565	20.409799999999997;23.4439	59.101;81.9429	3	0	2	81613;25476	1374620_at,1382975_at;1387027_a_at	33.4945	33.4945	4.33036	21.9268
GO:0002717	8	positive regulation of natural killer cell mediated immunity	19	20	1	1	1	0.95077	0.30389	0.30389	5	29199	Hfe	1370772_a_at		35.2166	35.2166	35.2166		35.2166		22.8112	22.8112	22.8112		22.8112		76.2381	76.2381	76.2381		76.2381		0	35.2166			35.2166	22.8112	76.2381	1	0	1	29199	1370772_a_at	35.2166	35.2166		22.8112
GO:0002718	6	regulation of cytokine production involved in immune response	56	59	1	1	1	0.71414	0.65709	1	1.69	29199	Hfe	1370772_a_at		35.2166	35.2166	35.2166		35.2166		22.8112	22.8112	22.8112		22.8112		76.2381	76.2381	76.2381		76.2381						35.2166	22.8112	76.2381	1	0	1	29199	1370772_a_at	35.2166	35.2166		22.8112
GO:0002719	7	negative regulation of cytokine production involved in immune response	21	21	1	1	1	0.94621	0.31639	0.31639	4.76	29199	Hfe	1370772_a_at		35.2166	35.2166	35.2166		35.2166		22.8112	22.8112	22.8112		22.8112		76.2381	76.2381	76.2381		76.2381						35.2166	22.8112	76.2381	1	0	1	29199	1370772_a_at	35.2166	35.2166		22.8112
GO:0002724	7	regulation of T cell cytokine production	20	22	1	1	1	0.94151	0.32867	0.32867	4.55	29199	Hfe	1370772_a_at		35.2166	35.2166	35.2166		35.2166		22.8112	22.8112	22.8112		22.8112		76.2381	76.2381	76.2381		76.2381						35.2166	22.8112	76.2381	1	0	1	29199	1370772_a_at	35.2166	35.2166		22.8112
GO:0002725	8	negative regulation of T cell cytokine production	6	6	1	1	1	0.99542	0.10292	0.10292	16.67	29199	Hfe	1370772_a_at		35.2166	35.2166	35.2166		35.2166		22.8112	22.8112	22.8112		22.8112		76.2381	76.2381	76.2381		76.2381		0	35.2166	0	35.2166	35.2166	22.8112	76.2381	1	0	1	29199	1370772_a_at	35.2166	35.2166		22.8112
GO:0002753	8	cytoplasmic pattern recognition receptor signaling pathway	10	10	1	1	1	0.98689	0.16561	0.16561	10	297989	Ddx58	1391463_at		19.5705	19.5705	19.5705		19.5705		14.1871	14.1871	14.1871		14.1871		30.9363	30.9363	30.9363		30.9363		0	19.5705	0	19.5705	19.5705	14.1871	30.9363	1	0	1	297989	1391463_at	19.5705	19.5705		14.1871
GO:0002757	6	immune response-activating signal transduction	138	145	4	4	4	0.88028	0.26282	0.33423	2.76	297989;291132;361659;25476	Ddx58;Gpld1;Plekha1;Lgals9	1391463_at;1380833_at;1376762_at;1387027_a_at		22.1457	21.366	9.29434	11.2619	20.2018	11.3037	14.5363	15.1853	4.33067	7.8811	12.9812	8.27518	44.1386	35.2918	24.0279	26.0005	40.8818	23.7131					19.5705;9.29434;23.1615;36.5565	14.1871;4.33067;16.1835;23.4439	30.9363;24.0279;39.6472;81.9429	2	2	2	297989;25476	1391463_at;1387027_a_at	28.0635	28.0635	12.0109	18.8155
GO:0002758	7	innate immune response-activating signal transduction	51	51	2	2	2	0.93672	0.23254	0.23254	3.92	297989;25476	Ddx58;Lgals9	1391463_at;1387027_a_at		28.0635	28.0635	19.5705	12.0109	31.0853	11.2249	18.8155	18.8155	14.1871	6.54555	20.4623	6.11722	56.4396	56.4396	30.9363	36.0671	65.5137	33.707					19.5705;36.5565	14.1871;23.4439	30.9363;81.9429	2	0	2	297989;25476	1391463_at;1387027_a_at	28.0635	28.0635	12.0109	18.8155
GO:0002761	7	regulation of myeloid leukocyte differentiation	104	106	3	3	3	0.87701	0.29622	0.44188	2.83	294270;81613;81813	RT1-Db1;Ceacam1;Klf10	1370382_at,1370383_s_at;1374620_at,1382975_at;1368650_at		22.0734	30.4324	4.69795	15.0511	24.9853	13.2872	14.6179	20.4098	2.6781	10.3417	16.6164	9.12765	83381.2	60.9906	59.101	144316	55616.1	127282					4.6979455;30.432450000000003;31.0897	2.6781043;20.409799999999997;20.7657	250023.52665;59.101;60.9906	4	1	2	294270;81613	1370382_at,1370383_s_at;1374620_at,1382975_at	17.5652	17.5652	18.197	11.544
GO:0002762	8	negative regulation of myeloid leukocyte differentiation	41	42	1	1	1	0.82644	0.53298	0.53298	2.38	81613	Ceacam1	1374620_at,1382975_at		30.4324	30.4324	30.4324		30.4324		20.4098	20.4098	20.4098		20.4098		59.101	59.101	59.101		59.101						30.4324	20.4098	59.101	2	0	1	81613	1374620_at,1382975_at	30.4324	30.4324		20.4098
GO:0002763	8	positive regulation of myeloid leukocyte differentiation	52	53	2	2	2	0.93061	0.24585	0.24585	3.77	294270;81813	RT1-Db1;Klf10	1370382_at,1370383_s_at;1368650_at		17.8938	17.8938	4.69795	18.6618	21.8791	17.7904	11.7219	11.7219	2.6781	12.7899	14.4532	12.1927	125042	125042	60.9906	176750	87297.2	168497					4.6979455;31.0897	2.6781043;20.7657	250023.52665;60.9906	2	1	1	294270	1370382_at,1370383_s_at	4.69795	4.69795		2.6781
GO:0002764	5	immune response-regulating signaling pathway	149	157	4	4	4	0.84806	0.31094	0.36826	2.55	297989;291132;361659;25476	Ddx58;Gpld1;Plekha1;Lgals9	1391463_at;1380833_at;1376762_at;1387027_a_at		22.1457	21.366	9.29434	11.2619	20.2018	11.3037	14.5363	15.1853	4.33067	7.8811	12.9812	8.27518	44.1386	35.2918	24.0279	26.0005	40.8818	23.7131					19.5705;9.29434;23.1615;36.5565	14.1871;4.33067;16.1835;23.4439	30.9363;24.0279;39.6472;81.9429	2	2	2	297989;25476	1391463_at;1387027_a_at	28.0635	28.0635	12.0109	18.8155
GO:0002768	6	immune response-regulating cell surface receptor signaling pathway	103	111	2	2	2	0.67921	0.59513	1	1.8	291132;361659	Gpld1;Plekha1	1380833_at;1376762_at		16.2279	16.2279	9.29434	9.80556	16.1835	9.80536	10.2571	10.2571	4.33067	8.38122	10.2192	8.38104	31.8376	31.8376	24.0279	11.0445	31.7876	11.0443					9.29434;23.1615	4.33067;16.1835	24.0279;39.6472	0	2	0
GO:0002790	6	peptide secretion	138	143	3	3	3	0.74506	0.47479	0.74451	2.1	116548;100359823;170824	Pcsk5;Tmem167a;Steap3	1392773_at;1376272_s_at;1370374_at	116548(-0.2018)	28.964	29.2859	24.5208	4.29136	28.6815	4.61771	19.4644	19.8232	17.1812	2.12662	19.2936	2.28717	55.788	55.2398	42.1138	13.9564	55.1227	14.9842					24.5208;29.2859;33.0854	17.1812;19.8232;21.3888	42.1138;55.2398;70.0105	2	1	2	116548;100359823	1392773_at;1376272_s_at	26.9033	26.9033	3.36943	18.5022
GO:0002791	7	regulation of peptide secretion	424	436	15	15	15	0.99462	0.012121	0.015131	3.44	297989;25419;24539;291132;29199;294270;59295;81613;24536;25476;116683;29516;24614;64045;80881	Ddx58;Crp;Lpl;Gpld1;Hfe;RT1-Db1;Nucb2;Ceacam1;Lepr;Lgals9;Efna5;Pde3b;Orm1;Glrx;Serp1	1391463_at;1387830_at;1386965_at;1380833_at;1370772_a_at;1370382_at,1370383_s_at;1370000_at;1374620_at,1382975_at;1370604_at,1370605_s_at,1371223_a_at,1388232_a_at;1387027_a_at;1375647_at;1369157_at;1368731_at;1367705_at,1386908_at;1386900_at	24536(-0.2274);116683(0.1685)	25.5602	27.3061	4.69795	11.6679	25.5337	12.1149	16.2467	18.5771	2.6781	7.49898	15.9904	8.00739	441715	52.381	24.0279	1.64266e+06	599373	1.90398e+06					19.5705;20.2265;36.9287;9.29434;35.2166;4.6979455;25.1917;30.432450000000003;14.379010000000001;36.5565;27.7022;27.3061;47.8233;15.623975;32.4532	14.1871;14.599;23.617;4.33067;22.8112;2.6781043;17.8142;20.409799999999997;5.44549525;23.4439;18.5771;19.0667;25.5109;9.751014999999999;21.4582	30.9363;32.2998;83.6043;24.0279;76.2381;250023.52665;42.7872;59.101;6375024.07585;81.9429;52.381;48.0975;49.603;29.54275;65.6803	15	6	12	297989;25419;24539;29199;294270;59295;81613;25476;29516;24614;64045;80881	1391463_at;1387830_at;1386965_at;1370772_a_at;1370382_at,1370383_s_at;1370000_at;1374620_at,1382975_at;1387027_a_at;1369157_at;1368731_at;1367705_at,1386908_at;1386900_at	27.669	28.8693	11.5145	17.9456
GO:0002792	7	negative regulation of peptide secretion	125	126	3	3	3	0.80957	0.39425	0.49533	2.38	59295;25476;29516	Nucb2;Lgals9;Pde3b	1370000_at;1387027_a_at;1369157_at		29.6848	27.3061	25.1917	6.04427	28.4402	5.46209	20.1083	19.0667	17.8142	2.95585	19.4913	2.68709	57.6092	48.0975	42.7872	21.2402	53.3255	19.0553					25.1917;36.5565;27.3061	17.8142;23.4439;19.0667	42.7872;81.9429;48.0975	3	0	3	59295;25476;29516	1370000_at;1387027_a_at;1369157_at	29.6848	27.3061	6.04427	20.1083
GO:0002793	7	positive regulation of peptide secretion	264	272	11	11	11	0.99628	0.010066	0.010066	4.04	297989;24539;291132;29199;294270;81613;24536;25476;24614;64045;80881	Ddx58;Lpl;Gpld1;Hfe;RT1-Db1;Ceacam1;Lepr;Lgals9;Orm1;Glrx;Serp1	1391463_at;1386965_at;1380833_at;1370772_a_at;1370382_at,1370383_s_at;1374620_at,1382975_at;1370604_at,1370605_s_at,1371223_a_at,1388232_a_at;1387027_a_at;1368731_at;1367705_at,1386908_at;1386900_at	24536(-0.2274)	25.7251	30.4324	4.69795	13.6728	25.5191	14.2735	15.7858	20.4098	2.6781	8.75439	15.2677	9.32449	602323	65.6803	24.0279	1.91606e+06	817157	2.20873e+06					19.5705;36.9287;9.29434;35.2166;4.6979455;30.432450000000003;14.379010000000001;36.5565;47.8233;15.623975;32.4532	14.1871;23.617;4.33067;22.8112;2.6781043;20.409799999999997;5.44549525;23.4439;25.5109;9.751014999999999;21.4582	30.9363;83.6043;24.0279;76.2381;250023.52665;59.101;6375024.07585;81.9429;49.603;29.54275;65.6803	12	5	9	297989;24539;29199;294270;81613;25476;24614;64045;80881	1391463_at;1386965_at;1370772_a_at;1370382_at,1370383_s_at;1374620_at,1382975_at;1387027_a_at;1368731_at;1367705_at,1386908_at;1386900_at	28.8115	32.4532	13.1577	18.2075
GO:0002819	6	regulation of adaptive immune response	134	150	3	3	3	0.71728	0.50654	0.75234	2	29199;81613;25476	Hfe;Ceacam1;Lgals9	1370772_a_at;1374620_at,1382975_at;1387027_a_at		34.0685	35.2166	30.4324	3.21941	33.75	3.33464	22.2216	22.8112	20.4098	1.60067	22.0627	1.65828	72.4273	76.2381	59.101	11.8882	71.2656	12.3053					35.2166;30.432450000000003;36.5565	22.8112;20.409799999999997;23.4439	76.2381;59.101;81.9429	4	0	3	29199;81613;25476	1370772_a_at;1374620_at,1382975_at;1387027_a_at	34.0685	35.2166	3.21941	22.2216
GO:0002820	7	negative regulation of adaptive immune response	38	38	2	2	2	0.9697	0.14823	0.14823	5.26	29199;81613	Hfe;Ceacam1	1370772_a_at;1374620_at,1382975_at		32.8245	32.8245	30.4324	3.3829	32.4863	3.34891	21.6105	21.6105	20.4098	1.69805	21.4407	1.68098	67.6696	67.6696	59.101	12.1178	66.4579	11.996	0.5	32.8245			35.2166;30.432450000000003	22.8112;20.409799999999997	76.2381;59.101	3	0	2	29199;81613	1370772_a_at;1374620_at,1382975_at	32.8245	32.8245	3.3829	21.6105
GO:0002822	7	regulation of adaptive immune response based on somatic recombination of immune receptors built from immunoglobulin superfamily domains	126	142	3	3	3	0.74898	0.47017	0.74347	2.11	29199;81613;25476	Hfe;Ceacam1;Lgals9	1370772_a_at;1374620_at,1382975_at;1387027_a_at		34.0685	35.2166	30.4324	3.21941	33.75	3.33464	22.2216	22.8112	20.4098	1.60067	22.0627	1.65828	72.4273	76.2381	59.101	11.8882	71.2656	12.3053					35.2166;30.432450000000003;36.5565	22.8112;20.409799999999997;23.4439	76.2381;59.101;81.9429	4	0	3	29199;81613;25476	1370772_a_at;1374620_at,1382975_at;1387027_a_at	34.0685	35.2166	3.21941	22.2216
GO:0002823	8	negative regulation of adaptive immune response based on somatic recombination of immune receptors built from immunoglobulin superfamily domains	35	35	2	2	2	0.97556	0.12979	0.12979	5.71	29199;81613	Hfe;Ceacam1	1370772_a_at;1374620_at,1382975_at		32.8245	32.8245	30.4324	3.3829	32.4863	3.34891	21.6105	21.6105	20.4098	1.69805	21.4407	1.68098	67.6696	67.6696	59.101	12.1178	66.4579	11.996	0.5	32.8245			35.2166;30.432450000000003	22.8112;20.409799999999997	76.2381;59.101	3	0	2	29199;81613	1370772_a_at;1374620_at,1382975_at	32.8245	32.8245	3.3829	21.6105
GO:0002831	5	regulation of response to biotic stimulus	105	110	5	5	5	0.98577	0.04787	0.04787	4.55	297989;303538;361730;81613;25476	Ddx58;Dhx58;Dak;Ceacam1;Lgals9	1391463_at;1385276_a_at;1377048_at;1374620_at,1382975_at;1387027_a_at		29.3413	30.4324	19.5705	6.27793	30.381	4.56881	19.6962	20.4098	14.1871	3.44995	20.3163	2.4674	57.5897	59.101	30.9363	18.6104	59.9332	14.1791					19.5705;32.0559;28.0913;30.432450000000003;36.5565	14.1871;21.2581;19.1821;20.409799999999997;23.4439	30.9363;64.2812;51.6873;59.101;81.9429	5	1	4	297989;303538;81613;25476	1391463_at;1385276_a_at;1374620_at,1382975_at;1387027_a_at	29.6538	31.2442	7.20409	19.8247
GO:0002832	6	negative regulation of response to biotic stimulus	30	31	3	3	3	0.99783	0.017685	0.017685	9.68	303538;361730;81613	Dhx58;Dak;Ceacam1	1385276_a_at;1377048_at;1374620_at,1382975_at		30.1932	30.4324	28.0913	1.9931	30.1749	2.10845	20.2833	20.4098	19.1821	1.04376	20.2736	1.10414	58.3565	59.101	51.6873	6.32987	58.3002	6.69662	0.5	29.2619			32.0559;28.0913;30.432450000000003	21.2581;19.1821;20.409799999999997	64.2812;51.6873;59.101	3	1	2	303538;81613	1385276_a_at;1374620_at,1382975_at	31.2442	31.2442	1.14795	20.8339
GO:0002833	6	positive regulation of response to biotic stimulus	35	37	2	2	2	0.97172	0.14203	0.14203	5.41	303538;25476	Dhx58;Lgals9	1385276_a_at;1387027_a_at		34.3062	34.3062	32.0559	3.1824	33.6073	3.02501	22.351	22.351	21.2581	1.54559	22.0116	1.46915	73.112	73.112	64.2812	12.4887	70.3692	11.871	0.5	34.3062			32.0559;36.5565	21.2581;23.4439	64.2812;81.9429	2	0	2	303538;25476	1385276_a_at;1387027_a_at	34.3062	34.3062	3.1824	22.351
GO:0002834	6	regulation of response to tumor cell	12	14	1	1	1	0.97471	0.22393	0.22393	7.14	81613	Ceacam1	1374620_at,1382975_at		30.4324	30.4324	30.4324		30.4324		20.4098	20.4098	20.4098		20.4098		59.101	59.101	59.101		59.101		0	30.4324			30.4324	20.4098	59.101	2	0	1	81613	1374620_at,1382975_at	30.4324	30.4324		20.4098
GO:0002835	7	negative regulation of response to tumor cell	3	3	1	1	1	0.99905	0.052852	0.052852	33.33	81613	Ceacam1	1374620_at,1382975_at		30.4324	30.4324	30.4324		30.4324		20.4098	20.4098	20.4098		20.4098		59.101	59.101	59.101		59.101		0	30.4324	0	30.4324	30.4324	20.4098	59.101	2	0	1	81613	1374620_at,1382975_at	30.4324	30.4324		20.4098
GO:0002837	6	regulation of immune response to tumor cell	12	14	1	1	1	0.97471	0.22393	0.22393	7.14	81613	Ceacam1	1374620_at,1382975_at		30.4324	30.4324	30.4324		30.4324		20.4098	20.4098	20.4098		20.4098		59.101	59.101	59.101		59.101		0	30.4324			30.4324	20.4098	59.101	2	0	1	81613	1374620_at,1382975_at	30.4324	30.4324		20.4098
GO:0002838	7	negative regulation of immune response to tumor cell	3	3	1	1	1	0.99905	0.052852	0.052852	33.33	81613	Ceacam1	1374620_at,1382975_at		30.4324	30.4324	30.4324		30.4324		20.4098	20.4098	20.4098		20.4098		59.101	59.101	59.101		59.101		0	30.4324	0	30.4324	30.4324	20.4098	59.101	2	0	1	81613	1374620_at,1382975_at	30.4324	30.4324		20.4098
GO:0002855	7	regulation of natural killer cell mediated immune response to tumor cell	7	7	1	1	1	0.99366	0.11902	0.11902	14.29	81613	Ceacam1	1374620_at,1382975_at		30.4324	30.4324	30.4324		30.4324		20.4098	20.4098	20.4098		20.4098		59.101	59.101	59.101		59.101		0	30.4324	0	30.4324	30.4324	20.4098	59.101	2	0	1	81613	1374620_at,1382975_at	30.4324	30.4324		20.4098
GO:0002856	8	negative regulation of natural killer cell mediated immune response to tumor cell	2	2	1	1	1	0.99968	0.035551	0.035551	50	81613	Ceacam1	1374620_at,1382975_at		30.4324	30.4324	30.4324		30.4324		20.4098	20.4098	20.4098		20.4098		59.101	59.101	59.101		59.101		0	30.4324	0	30.4324	30.4324	20.4098	59.101	2	0	1	81613	1374620_at,1382975_at	30.4324	30.4324		20.4098
GO:0002858	7	regulation of natural killer cell mediated cytotoxicity directed against tumor cell target	7	7	1	1	1	0.99366	0.11902	0.11902	14.29	81613	Ceacam1	1374620_at,1382975_at		30.4324	30.4324	30.4324		30.4324		20.4098	20.4098	20.4098		20.4098		59.101	59.101	59.101		59.101		0	30.4324	0	30.4324	30.4324	20.4098	59.101	2	0	1	81613	1374620_at,1382975_at	30.4324	30.4324		20.4098
GO:0002859	8	negative regulation of natural killer cell mediated cytotoxicity directed against tumor cell target	2	2	1	1	1	0.99968	0.035551	0.035551	50	81613	Ceacam1	1374620_at,1382975_at		30.4324	30.4324	30.4324		30.4324		20.4098	20.4098	20.4098		20.4098		59.101	59.101	59.101		59.101		0	30.4324	0	30.4324	30.4324	20.4098	59.101	2	0	1	81613	1374620_at,1382975_at	30.4324	30.4324		20.4098
GO:0002861	6	regulation of inflammatory response to antigenic stimulus	26	28	1	1	1	0.91069	0.39788	0.39788	3.57	294270	RT1-Db1	1370382_at,1370383_s_at		4.69795	4.69795	4.69795		4.69795		2.6781	2.6781	2.6781		2.6781		250024	250024	250024		250024						4.69795	2.6781	250024	2	0	1	294270	1370382_at,1370383_s_at	4.69795	4.69795		2.6781
GO:0002862	7	negative regulation of inflammatory response to antigenic stimulus	14	15	1	1	1	0.97116	0.23786	0.23786	6.67	294270	RT1-Db1	1370382_at,1370383_s_at		4.69795	4.69795	4.69795		4.69795		2.6781	2.6781	2.6781		2.6781		250024	250024	250024		250024		0	4.69795			4.69795	2.6781	250024	2	0	1	294270	1370382_at,1370383_s_at	4.69795	4.69795		2.6781
GO:0002886	7	regulation of myeloid leukocyte mediated immunity	51	54	1	1	1	0.74749	0.62446	0.62446	1.85	25476	Lgals9	1387027_a_at		36.5565	36.5565	36.5565		36.5565		23.4439	23.4439	23.4439		23.4439		81.9429	81.9429	81.9429		81.9429						36.5565	23.4439	81.9429	1	0	1	25476	1387027_a_at	36.5565	36.5565		23.4439
GO:0002887	8	negative regulation of myeloid leukocyte mediated immunity	9	9	1	1	1	0.98939	0.15036	0.15036	11.11	25476	Lgals9	1387027_a_at		36.5565	36.5565	36.5565		36.5565		23.4439	23.4439	23.4439		23.4439		81.9429	81.9429	81.9429		81.9429		0	36.5565	0	36.5565	36.5565	23.4439	81.9429	1	0	1	25476	1387027_a_at	36.5565	36.5565		23.4439
GO:0002930	5	trabecular meshwork development	2	2	1	1	1	0.99968	0.035551	0.035551	50	25426	Cyp1b1	1368990_at		27.2489	27.2489	27.2489		27.2489		18.7215	18.7215	18.7215		18.7215		49.2941	49.2941	49.2941		49.2941		0	27.2489	0	27.2489	27.2489	18.7215	49.2941	1	0	1	25426	1368990_at	27.2489	27.2489		18.7215
GO:0002931	4	response to ischemia	43	47	3	3	3	0.99016	0.051863	0.051863	6.38	266766;116686;64045	Rcan1;Gsr;Glrx	1388686_at;1369061_at;1367705_at,1386908_at		14.8886	15.624	0.324769	14.2104	8.39304	14.8489	9.77412	9.75101	0.0517397	9.73395	5.51687	10.136	8.33336e+06	53.5243	29.5428	1.44337e+07	1.69181e+07	1.43211e+07	1.5	22.1705			0.324769;28.7171;15.623975	0.0517397;19.5196;9.751014999999999	2.5E7;53.5243;29.54275	4	0	3	266766;116686;64045	1388686_at;1369061_at;1367705_at,1386908_at	14.8886	15.624	14.2104	9.77412
GO:0002933	6	lipid hydroxylation	3	3	2	2	2	0.99999	0.00094953	0.00094953	66.67	171352;24296	Cyp3a9;Cyp1a1	1370387_at;1370269_at		13.0207	13.0207	0.140946	18.2147	4.65394	13.8481	9.01047	9.01047	0.0512492	12.6703	3.19052	9.63284	29.4787	29.4787	13.316	22.8575	18.9793	17.3779	0	0.140946	0	0.140946	25.9004;0.140946	17.9697;0.0512492	45.6414;13.316	2	0	2	171352;24296	1370387_at;1370269_at	13.0207	13.0207	18.2147	9.01047
GO:0002934	6	desmosome organization	9	9	1	1	1	0.98939	0.15036	0.15036	11.11	292949	Perp	1389177_at		31.4104	31.4104	31.4104		31.4104		20.9301	20.9301	20.9301		20.9301		62.0658	62.0658	62.0658		62.0658		0	31.4104	0	31.4104	31.4104	20.9301	62.0658	1	0	1	292949	1389177_at	31.4104	31.4104		20.9301
GO:0003002	4	regionalization	212	217	5	5	5	0.80478	0.34967	0.59887	2.3	406164;116548;289264;29454;260326	Pbx2;Pcsk5;Grem2;Gdf11;Gpr56	1389432_at;1392773_at;1380799_at;1374706_at;1371696_at	116548(-0.2018);29454(-0.1579)	23.5261	24.5208	1.62109	17.0479	18.9262	17.341	15.1673	17.1812	0.105802	10.7601	12.0587	11.4099	5.00005e+06	93.5361	16.903	1.11803e+07	9.42723e+06	1.35465e+07					11.7221;24.5208;41.7887;1.62109;37.9776	8.8494;17.1812;26.3981;0.105802;23.3019	16.903;42.1138;105.191;2.5E7;93.5361	2	3	2	116548;289264	1392773_at;1380799_at	33.1547	33.1547	12.2102	21.7897
GO:0003006	3	developmental process involved in reproduction	577	608	17	17	17	0.97443	0.046639	0.060374	2.8	304608;58819;286896;361659;260326;58919;170913;25697;60628;246097;24536;24684;25690;29200;25426;81707;100912108	Mmp19;Txnrd1;Sgpl1;Plekha1;Gpr56;Ccnd1;Abcb1a;Ctsl;Cxcr4;Fas;Lepr;Prlr;Ahr;Inhba;Cyp1b1;Mmp14;Nupr1	1391095_at;1386958_at;1382843_at;1376762_at;1371696_at;1371150_at,1371643_at,1383075_at;1370464_at,1370465_at;1370244_at;1389244_x_at;1397221_s_at;1370604_at,1370605_s_at,1371223_a_at,1388232_a_at;1369493_at,1370384_a_at,1370789_a_at;1369146_a_at;1369012_at,1383486_at;1368990_at;1367860_a_at;1367847_at	24536(-0.2274)	19.556	22.451	0.0158072	14.4302	16.0667	14.2333	12.6549	15.9613	6.31202e-05	9.57632	10.1633	9.55533	3.34563e+06	53.349	4.56418	8.29385e+06	5.89726e+06	1.04199e+07					29.5192;21.6641;22.451;23.1615;37.9776;15.557466666666665;2.461988;0.119104;0.235955;0.0158072;14.379010000000001;25.46343333333333;0.487373;38.44015;27.2489;37.5583;35.7108	20.2773;15.6676;15.9613;16.1835;23.3019;11.556399999999998;0.077203;0.0377096;0.0107916;6.31202E-5;5.44549525;17.215933333333336;0.0641274;24.11155;18.7215;23.9073;22.5936	54.4716;34.7079;37.1795;39.6472;93.5361;23.282066666666665;10.065059999999999;4.56418;2.5E7;500000.0;6375024.07585;46.798966666666665;2.5E7;53.34895;49.2941;86.4955;80.9168	9	17	8	304608;58819;286896;170913;25697;246097;25690;25426	1391095_at;1386958_at;1382843_at;1370464_at,1370465_at;1370244_at;1397221_s_at;1369146_a_at;1368990_at	12.9959	12.063	13.3225	8.85085
GO:0003008	3	system process	1043	1081	19	18	18	0.42784	0.66511	0.9044	1.67	266766;25419;24423;81661;363143;619558;296654;170913;171352;60628;246097;81613;63867;64558;25690;29547;29686;81664	Rcan1;Crp;Gstm1;Gmfb;Gnat1;Fam134b;Gsn;Abcb1a;Cyp3a9;Cxcr4;Fas;Ceacam1;Ugt2a1;Fzd4;Ahr;Homer2;Scn1b;Gnai2	1388686_at;1387830_at;1386985_at;1387663_at;1373587_at;1373011_at;1371414_at;1370464_at,1370465_at;1370387_at;1389244_x_at;1397221_s_at;1374620_at,1382975_at;1369850_at;1369468_at;1369146_a_at;1368872_a_at;1387010_s_at;1367844_at	81661(-0.1388);619558(0.3826);64558(0.3921)	14.405	7.77695	0.0158072	15.2193	11.7751	14.4876	8.74341	1.09563	1.15429e-07	10.0636	6.57968	9.25213	5.61114e+06	61.6792	10.0651	1.06654e+07	7.29269e+06	1.16722e+07					0.324769;20.2265;20.1987;10.1263;34.1415;32.0491;0.530685;2.461988;25.9004;0.235955;0.0158072;30.432450000000003;5.4276;0.0781713;0.487373;35.8021;0.288393;40.5617	0.0517397;14.599;14.5817;0.107863;22.2926;21.2547;0.0822551;0.077203;17.9697;0.0107916;6.31202E-5;20.409799999999997;2.0834;1.15429E-7;0.0641274;18.4899;0.057104;25.2495	2.5E7;32.2998;32.2415;36.8047;71.9494;64.2574;21.0222;10.065059999999999;45.6414;2.5E7;500000.0;59.101;14.844;2.5E7;2.5E7;48.0406;500000.0;101.866	16	4	14	266766;25419;24423;81661;363143;619558;170913;171352;246097;81613;63867;64558;25690;29547	1388686_at;1387830_at;1386985_at;1387663_at;1373587_at;1373011_at;1370464_at,1370465_at;1370387_at;1397221_s_at;1374620_at,1382975_at;1369850_at;1369468_at;1369146_a_at;1368872_a_at	15.5481	15.1625	14.2577	9.42727
GO:0003012	4	muscle system process	202	209	4	3	3	0.48139	0.7277	1	1.44	296654;60628;29686	Gsn;Cxcr4;Scn1b	1371414_at;1389244_x_at;1387010_s_at		0.351678	0.288393	0.235955	0.157226	0.396982	0.17428	0.0500502	0.057104	0.0107916	0.0362502	0.0532227	0.0408863	8.50001e+06	500000	21.0222	1.42916e+07	9.31986e+06	1.47429e+07					0.530685;0.235955;0.288393	0.0822551;0.0107916;0.057104	21.0222;2.5E7;500000.0	0	3	0
GO:0003013	4	circulatory system process	198	205	3	3	3	0.49658	0.71554	1	1.46	25419;81613;25690	Crp;Ceacam1;Ahr	1387830_at;1374620_at,1382975_at;1369146_a_at		17.0488	20.2265	0.487373	15.2233	12.0272	16.955	11.691	14.599	0.0641274	10.4799	8.02037	11.6109	8.33336e+06	59.101	32.2998	1.44337e+07	1.44884e+07	1.51143e+07					20.2265;30.432450000000003;0.487373	14.599;20.409799999999997;0.0641274	32.2998;59.101;2.5E7	4	0	3	25419;81613;25690	1387830_at;1374620_at,1382975_at;1369146_a_at	17.0488	20.2265	15.2233	11.691
GO:0003014	4	renal system process	84	86	3	3	3	0.93129	0.20041	0.20041	3.49	296654;246097;81664	Gsn;Fas;Gnai2	1371414_at;1397221_s_at;1367844_at		13.7027	0.530685	0.0158072	23.262	9.93025	20.8937	8.44394	0.0822551	6.31202e-05	14.5541	6.02768	13.1105	166708	101.866	21.0222	288640	74519	218018					0.530685;0.0158072;40.5617	0.0822551;6.31202E-5;25.2495	21.0222;500000.0;101.866	1	2	1	246097	1397221_s_at	0.0158072	0.0158072		6.31202e-05
GO:0003018	5	vascular process in circulatory system	179	185	3	3	3	0.57522	0.64849	1	1.62	25419;81613;25690	Crp;Ceacam1;Ahr	1387830_at;1374620_at,1382975_at;1369146_a_at		17.0488	20.2265	0.487373	15.2233	12.0272	16.955	11.691	14.599	0.0641274	10.4799	8.02037	11.6109	8.33336e+06	59.101	32.2998	1.44337e+07	1.44884e+07	1.51143e+07					20.2265;30.432450000000003;0.487373	14.599;20.409799999999997;0.0641274	32.2998;59.101;2.5E7	4	0	3	25419;81613;25690	1387830_at;1374620_at,1382975_at;1369146_a_at	17.0488	20.2265	15.2233	11.691
GO:0003085	6	negative regulation of systemic arterial blood pressure	20	22	1	1	1	0.94151	0.32867	0.32867	4.55	25690	Ahr	1369146_a_at		0.487373	0.487373	0.487373		0.487373		0.0641274	0.0641274	0.0641274		0.0641274		25000000	25000000	25000000		25000000						0.487373	0.0641274	25000000	1	0	1	25690	1369146_a_at	0.487373	0.487373		0.0641274
GO:0003159	6	morphogenesis of an endothelium	11	11	1	1	1	0.98417	0.18058	0.18058	9.09	60628	Cxcr4	1389244_x_at		0.235955	0.235955	0.235955		0.235955		0.0107916	0.0107916	0.0107916		0.0107916		25000000	25000000	25000000		25000000		0	0.235955			0.235955	0.0107916	25000000	0	1	0
GO:0003179	4	heart valve morphogenesis	34	34	1	1	1	0.87623	0.45999	0.45999	2.94	94268	Efna1	1372844_at		24.7896	24.7896	24.7896		24.7896		17.5606	17.5606	17.5606		17.5606		41.8713	41.8713	41.8713		41.8713						24.7896	17.5606	41.8713	1	0	1	94268	1372844_at	24.7896	24.7896		17.5606
GO:0003180	5	aortic valve morphogenesis	7	7	1	1	1	0.99366	0.11902	0.11902	14.29	94268	Efna1	1372844_at		24.7896	24.7896	24.7896		24.7896		17.5606	17.5606	17.5606		17.5606		41.8713	41.8713	41.8713		41.8713		0	24.7896	0	24.7896	24.7896	17.5606	41.8713	1	0	1	94268	1372844_at	24.7896	24.7896		17.5606
GO:0003181	5	atrioventricular valve morphogenesis	21	21	1	1	1	0.94621	0.31639	0.31639	4.76	94268	Efna1	1372844_at		24.7896	24.7896	24.7896		24.7896		17.5606	17.5606	17.5606		17.5606		41.8713	41.8713	41.8713		41.8713						24.7896	17.5606	41.8713	1	0	1	94268	1372844_at	24.7896	24.7896		17.5606
GO:0003183	6	mitral valve morphogenesis	8	8	1	1	1	0.99165	0.13483	0.13483	12.5	94268	Efna1	1372844_at		24.7896	24.7896	24.7896		24.7896		17.5606	17.5606	17.5606		17.5606		41.8713	41.8713	41.8713		41.8713		0	24.7896	0	24.7896	24.7896	17.5606	41.8713	1	0	1	94268	1372844_at	24.7896	24.7896		17.5606
GO:0003199	9	endocardial cushion to mesenchymal transition involved in heart valve formation	4	4	1	1	1	0.99812	0.069844	0.069844	25	94268	Efna1	1372844_at		24.7896	24.7896	24.7896		24.7896		17.5606	17.5606	17.5606		17.5606		41.8713	41.8713	41.8713		41.8713		0	24.7896	0	24.7896	24.7896	17.5606	41.8713	1	0	1	94268	1372844_at	24.7896	24.7896		17.5606
GO:0003206	4	cardiac chamber morphogenesis	33	33	1	1	1	0.88218	0.4501	0.4501	3.03	25690	Ahr	1369146_a_at		0.487373	0.487373	0.487373		0.487373		0.0641274	0.0641274	0.0641274		0.0641274		25000000	25000000	25000000		25000000						0.487373	0.0641274	25000000	1	0	1	25690	1369146_a_at	0.487373	0.487373		0.0641274
GO:0003208	5	cardiac ventricle morphogenesis	28	28	1	1	1	0.91069	0.39788	0.39788	3.57	25690	Ahr	1369146_a_at		0.487373	0.487373	0.487373		0.487373		0.0641274	0.0641274	0.0641274		0.0641274		25000000	25000000	25000000		25000000						0.487373	0.0641274	25000000	1	0	1	25690	1369146_a_at	0.487373	0.487373		0.0641274
GO:0003214	6	cardiac left ventricle morphogenesis	12	12	1	1	1	0.98122	0.19529	0.19529	8.33	25690	Ahr	1369146_a_at		0.487373	0.487373	0.487373		0.487373		0.0641274	0.0641274	0.0641274		0.0641274		25000000	25000000	25000000		25000000		0	0.487373			0.487373	0.0641274	25000000	1	0	1	25690	1369146_a_at	0.487373	0.487373		0.0641274
GO:0003222	6	ventricular trabecula myocardium morphogenesis	16	16	1	1	1	0.96742	0.25155	0.25155	6.25	298652	Ube4b	1374507_at,1376862_at		21.3806	21.3806	21.3806		21.3806		15.4179	15.4179	15.4179		15.4179		34.3804	34.3804	34.3804		34.3804		0	21.3806			21.3806	15.4179	34.3804	2	0	1	298652	1374507_at,1376862_at	21.3806	21.3806		15.4179
GO:0003241	5	growth involved in heart morphogenesis	5	5	1	1	1	0.99691	0.086532	0.086532	20	25690	Ahr	1369146_a_at		0.487373	0.487373	0.487373		0.487373		0.0641274	0.0641274	0.0641274		0.0641274		25000000	25000000	25000000		25000000		0	0.487373	0	0.487373	0.487373	0.0641274	25000000	1	0	1	25690	1369146_a_at	0.487373	0.487373		0.0641274
GO:0003243	6	circumferential growth involved in left ventricle morphogenesis	1	1	1	1	1	1	0.017936	0.017936	100	25690	Ahr	1369146_a_at		0.487373	0.487373	0.487373		0.487373		0.0641274	0.0641274	0.0641274		0.0641274		25000000	25000000	25000000		25000000		0	0.487373	0	0.487373	0.487373	0.0641274	25000000	1	0	1	25690	1369146_a_at	0.487373	0.487373		0.0641274
GO:0003254	5	regulation of membrane depolarization	42	43	1	1	1	0.82	0.54138	0.54138	2.33	29686	Scn1b	1387010_s_at		0.288393	0.288393	0.288393		0.288393		0.057104	0.057104	0.057104		0.057104		500000	500000	500000		500000						0.288393	0.057104	500000	0	1	0
GO:0003279	4	cardiac septum development	47	48	2	2	2	0.94538	0.21267	0.21267	4.17	116548;60628	Pcsk5;Cxcr4	1392773_at;1389244_x_at	116548(-0.2018)	12.3784	12.3784	0.235955	17.172	14.2924	16.9573	8.596	8.596	0.0107916	12.1413	9.94932	11.9895	1.25e+07	1.25e+07	42.1138	1.76776e+07	1.05296e+07	1.74566e+07					24.5208;0.235955	17.1812;0.0107916	42.1138;2.5E7	1	1	1	116548	1392773_at	24.5208	24.5208		17.1812
GO:0003281	5	ventricular septum development	35	36	1	1	1	0.86412	0.47924	0.47924	2.78	60628	Cxcr4	1389244_x_at		0.235955	0.235955	0.235955		0.235955		0.0107916	0.0107916	0.0107916		0.0107916		25000000	25000000	25000000		25000000						0.235955	0.0107916	25000000	0	1	0
GO:0003365	5	establishment of cell polarity involved in ameboidal cell migration	3	3	1	1	1	0.99905	0.052852	0.052852	33.33	315430	Amotl1	1371627_at		0.0925913	0.0925913	0.0925913		0.0925913		0.0342073	0.0342073	0.0342073		0.0342073		0.778	0.778	0.778		0.778		0	0.0925913	0	0.0925913	0.0925913	0.0342073	0.778	0	1	0
GO:0003420	6	regulation of growth plate cartilage chondrocyte proliferation	2	2	1	1	1	0.99968	0.035551	0.035551	50	29441	Por	1368213_at,1387109_at		15.4996	15.4996	15.4996		15.4996		9.02697	9.02697	9.02697		9.02697		30.4732	30.4732	30.4732		30.4732		0	15.4996	0	15.4996	15.4996	9.02697	30.4732	2	0	1	29441	1368213_at,1387109_at	15.4996	15.4996		9.02697
GO:0005975	4	carbohydrate metabolic process	318	341	11	11	11	0.97981	0.043745	0.057943	3.23	501907;313843;361730;304543;305234;310864;192281;286954;63867;24651;80881	RGD1559459;Galm;Dak;Mlec;Stbd1;Manba;Oas1a;Ugt2b1;Ugt2a1;Pklr;Serp1	1381852_at;1379250_at;1377048_at;1375697_at;1372602_at;1371875_at;1371152_a_at;1370698_at;1369850_at;1368651_at,1387263_at;1386900_at		16.8183	20.1872	0.0904144	11.6928	14.1187	11.4751	10.6469	14.5745	0.0374753	8.90133	8.47873	8.79251	32.5911	32.2173	0.594918	20.3578	28.4158	19.7484					6.38914;26.6933;28.0913;7.71446;6.36817;20.1872;28.5593;0.0904144;5.4276;23.027;32.4532	2.35873;18.414;19.1821;3.13511;0.255943;14.5745;19.4349;0.0374753;2.0834;16.181649999999998;21.4582	15.8599;47.7634;51.6873;18.9459;18.8269;32.2173;53.0563;0.594918;14.844;39.02565;65.6803	8	4	8	501907;304543;305234;310864;192281;286954;63867;80881	1381852_at;1375697_at;1372602_at;1371875_at;1371152_a_at;1370698_at;1369850_at;1386900_at	13.3987	7.0518	12.015	7.91728
GO:0005976	5	polysaccharide metabolic process	54	58	2	2	2	0.91424	0.2792	0.2792	3.45	305234;310864	Stbd1;Manba	1372602_at;1371875_at		13.2777	13.2777	6.36817	9.77153	11.5177	9.44922	7.41522	7.41522	0.255943	10.1247	5.59163	9.79079	25.5221	25.5221	18.8269	9.46844	23.8167	9.15613					6.36817;20.1872	0.255943;14.5745	18.8269;32.2173	2	0	2	305234;310864	1372602_at;1371875_at	13.2777	13.2777	9.77153	7.41522
GO:0005977	6	glycogen metabolic process	41	44	1	1	1	0.81352	0.54964	0.54964	2.27	305234	Stbd1	1372602_at		6.36817	6.36817	6.36817		6.36817		0.255943	0.255943	0.255943		0.255943		18.8269	18.8269	18.8269		18.8269						6.36817	0.255943	18.8269	1	0	1	305234	1372602_at	6.36817	6.36817		0.255943
GO:0005980	7	glycogen catabolic process	9	10	1	1	1	0.98689	0.16561	0.16561	10	305234	Stbd1	1372602_at		6.36817	6.36817	6.36817		6.36817		0.255943	0.255943	0.255943		0.255943		18.8269	18.8269	18.8269		18.8269		0	6.36817	0	6.36817	6.36817	0.255943	18.8269	1	0	1	305234	1372602_at	6.36817	6.36817		0.255943
GO:0005996	4	monosaccharide metabolic process	127	143	6	6	6	0.98542	0.043962	0.043962	4.2	501907;313843;192281;286954;63867;80881	RGD1559459;Galm;Oas1a;Ugt2b1;Ugt2a1;Serp1	1381852_at;1379250_at;1371152_a_at;1370698_at;1369850_at;1386900_at		16.6022	16.5412	0.0904144	14.1271	11.891	12.8593	10.6311	10.3864	0.0374753	10.0899	7.06733	9.20701	32.9665	31.8117	0.594918	25.9296	25.0408	23.721					6.38914;26.6933;28.5593;0.0904144;5.4276;32.4532	2.35873;18.414;19.4349;0.0374753;2.0834;21.4582	15.8599;47.7634;53.0563;0.594918;14.844;65.6803	5	1	5	501907;192281;286954;63867;80881	1381852_at;1371152_a_at;1370698_at;1369850_at;1386900_at	14.5839	6.38914	14.7959	9.07454
GO:0006006	6	glucose metabolic process	83	87	3	3	3	0.92895	0.20503	0.20503	3.45	313843;192281;80881	Galm;Oas1a;Serp1	1379250_at;1371152_a_at;1386900_at		29.2353	28.5593	26.6933	2.93885	29.6761	3.11231	19.769	19.4349	18.414	1.54936	19.9992	1.64031	55.5	53.0563	47.7634	9.20503	56.9132	9.75397					26.6933;28.5593;32.4532	18.414;19.4349;21.4582	47.7634;53.0563;65.6803	2	1	2	192281;80881	1371152_a_at;1386900_at	30.5063	30.5063	2.7534	20.4465
GO:0006011	6	UDP-glucose metabolic process	3	3	1	1	1	0.99905	0.052852	0.052852	33.33	171129	Uggt1	1368953_at		25.5557	25.5557	25.5557		25.5557		17.7745	17.7745	17.7745		17.7745		44.7408	44.7408	44.7408		44.7408		0	25.5557	0	25.5557	25.5557	17.7745	44.7408	1	0	1	171129	1368953_at	25.5557	25.5557		17.7745
GO:0006012	6	galactose metabolic process	10	10	1	1	1	0.98689	0.16561	0.16561	10	313843	Galm	1379250_at		26.6933	26.6933	26.6933		26.6933		18.414	18.414	18.414		18.414		47.7634	47.7634	47.7634		47.7634		0	26.6933	0	26.6933	26.6933	18.414	47.7634	0	1	0
GO:0006022	5	aminoglycan metabolic process	66	69	1	1	1	0.64811	0.71412	1	1.45	83472	Ugdh	1367938_at		20.3319	20.3319	20.3319		20.3319		14.7989	14.7989	14.7989		14.7989		32.0222	32.0222	32.0222		32.0222						20.3319	14.7989	32.0222	1	0	1	83472	1367938_at	20.3319	20.3319		14.7989
GO:0006023	6	aminoglycan biosynthetic process	27	28	1	1	1	0.91069	0.39788	0.39788	3.57	83472	Ugdh	1367938_at		20.3319	20.3319	20.3319		20.3319		14.7989	14.7989	14.7989		14.7989		32.0222	32.0222	32.0222		32.0222						20.3319	14.7989	32.0222	1	0	1	83472	1367938_at	20.3319	20.3319		14.7989
GO:0006024	7	glycosaminoglycan biosynthetic process	23	23	1	1	1	0.93668	0.34074	0.34074	4.35	83472	Ugdh	1367938_at		20.3319	20.3319	20.3319		20.3319		14.7989	14.7989	14.7989		14.7989		32.0222	32.0222	32.0222		32.0222						20.3319	14.7989	32.0222	1	0	1	83472	1367938_at	20.3319	20.3319		14.7989
GO:0006063	7	uronic acid metabolic process	5	13	3	3	3	0.99994	0.0014258	0.0014258	23.08	501907;286954;63867	RGD1559459;Ugt2b1;Ugt2a1	1381852_at;1370698_at;1369850_at		3.96905	5.4276	0.0904144	3.39323	4.50066	3.07994	1.4932	2.0834	0.0374753	1.26819	1.69364	1.14986	10.4329	14.844	0.594918	8.5351	11.7966	7.73253	0	0.0904144	0.5	2.75901	6.38914;0.0904144;5.4276	2.35873;0.0374753;2.0834	15.8599;0.594918;14.844	3	0	3	501907;286954;63867	1381852_at;1370698_at;1369850_at	3.96905	5.4276	3.39323	1.4932
GO:0006065	6	UDP-glucuronate biosynthetic process	1	1	1	1	1	1	0.017936	0.017936	100	83472	Ugdh	1367938_at		20.3319	20.3319	20.3319		20.3319		14.7989	14.7989	14.7989		14.7989		32.0222	32.0222	32.0222		32.0222		0	20.3319	0	20.3319	20.3319	14.7989	32.0222	1	0	1	83472	1367938_at	20.3319	20.3319		14.7989
GO:0006066	4	alcohol metabolic process	222	230	10	10	10	0.99707	0.0086174	0.0086174	4.35	288985;25315;64305;298079;361730;294400;191574;24536;25426;25080	Insig2;Ephx1;Sult1b1;Aldh1b1;Dak;Nus1;Akr1c14;Lepr;Cyp1b1;Apoa4	1389377_at,1393690_at;1387669_a_at;1387314_at;1383472_at;1377048_at;1392522_at;1370563_at,1370708_a_at,1396933_s_at;1370604_at,1370605_s_at,1371223_a_at,1388232_a_at;1368990_at;1368520_at	294400(0.1633);24536(-0.2274)	19.8577	21.2155	0.44934	10.0904	21.1516	10.4764	12.7284	14.6817	0.0892025	7.5676	13.7786	7.71589	1.52087e+06	50.4907	20.9633	3.1128e+06	1.0232e+06	2.52135e+06					18.81295;8.09437;34.7354;22.3728;28.0913;24.3346;20.05819333333333;14.379010000000001;27.2489;0.44934	13.64725;2.7845;22.5803;15.7161;19.1821;17.0734;12.044102500000001;5.44549525;18.7215;0.0892025	29.77735;20.9633;74.2881;37.7909;51.6873;41.6531;8333364.1421;6375024.07585;49.2941;500000.0	10	6	7	288985;25315;64305;294400;191574;25426;25080	1389377_at,1393690_at;1387669_a_at;1387314_at;1392522_at;1370563_at,1370708_a_at,1396933_s_at;1368990_at;1368520_at	19.1048	20.0582	11.6063	12.42
GO:0006067	6	ethanol metabolic process	11	11	2	2	2	0.99916	0.015834	0.015834	18.18	64305;298079	Sult1b1;Aldh1b1	1387314_at;1383472_at		28.5541	28.5541	22.3728	8.74168	28.1084	8.71892	19.1482	19.1482	15.7161	4.85372	18.9007	4.84109	56.0395	56.0395	37.7909	25.8074	54.7236	25.7402	0	22.3728	0.5	28.5541	34.7354;22.3728	22.5803;15.7161	74.2881;37.7909	1	1	1	64305	1387314_at	34.7354	34.7354		22.5803
GO:0006068	6	ethanol catabolic process	10	10	2	2	2	0.99938	0.013109	0.013109	20	64305;298079	Sult1b1;Aldh1b1	1387314_at;1383472_at		28.5541	28.5541	22.3728	8.74168	28.1084	8.71892	19.1482	19.1482	15.7161	4.85372	18.9007	4.84109	56.0395	56.0395	37.7909	25.8074	54.7236	25.7402	0	22.3728	0	22.3728	34.7354;22.3728	22.5803;15.7161	74.2881;37.7909	1	1	1	64305	1387314_at	34.7354	34.7354		22.5803
GO:0006071	6	glycerol metabolic process	12	12	1	1	1	0.98122	0.19529	0.19529	8.33	361730	Dak	1377048_at		28.0913	28.0913	28.0913		28.0913		19.1821	19.1821	19.1821		19.1821		51.6873	51.6873	51.6873		51.6873		0	28.0913			28.0913	19.1821	51.6873	0	1	0
GO:0006073	6	cellular glucan metabolic process	41	44	1	1	1	0.81352	0.54964	0.54964	2.27	305234	Stbd1	1372602_at		6.36817	6.36817	6.36817		6.36817		0.255943	0.255943	0.255943		0.255943		18.8269	18.8269	18.8269		18.8269						6.36817	0.255943	18.8269	1	0	1	305234	1372602_at	6.36817	6.36817		0.255943
GO:0006081	4	cellular aldehyde metabolic process	51	53	1	1	1	0.75415	0.61757	0.61757	1.89	25426	Cyp1b1	1368990_at		27.2489	27.2489	27.2489		27.2489		18.7215	18.7215	18.7215		18.7215		49.2941	49.2941	49.2941		49.2941						27.2489	18.7215	49.2941	1	0	1	25426	1368990_at	27.2489	27.2489		18.7215
GO:0006082	4	organic acid metabolic process	725	768	32	32	32	1	6.8833e-06	7.4746e-06	4.17	688283;266730;299857;171402;292728;171518;171400;64305;24297;24539;58819;286896;501907;364070;362676;299194;363285;286954;293989;191574;246074;24296;24552;63867;24894;24299;25426;24651;25303;29441;24311;83472	Afmid;Slc17a3;Shmt2;Elovl6;Cyp2b21;Cyp2c22;Elovl5;Sult1b1;Cyp1a2;Lpl;Txnrd1;Sgpl1;RGD1559459;Iars2;Fam213b;Ptgr2;Scly;Ugt2b1;Cyp2c6v1;Akr1c14;Scd1;Cyp1a1;Me1;Ugt2a1;Cyp2a1;Cyp2a3;Cyp1b1;Pklr;Abcc2;Por;Ddc;Ugdh	1396300_at,1396301_x_at;1390591_at;1388695_at;1388108_at;1387993_at;1387949_at;1387630_at;1387314_at;1387243_at;1386965_at;1386958_at;1382843_at;1381852_at;1380561_at;1379367_at;1384345_at;1374524_at;1370698_at;1370580_a_at;1370563_at,1370708_a_at,1396933_s_at;1370355_at;1370269_at;1370067_at,1370870_at;1369850_at;1387511_at;1369136_at;1368990_at;1368651_at,1387263_at;1368497_at;1368213_at,138710…		18.5713	18.919	0.0904144	13.4233	17.5739	13.7918	11.7373	12.8211	0.0374753	9.50749	11.2524	9.60938	276078	33.365	0.594918	1.47294e+06	121737	1.01155e+06					31.613799999999998;37.2018;7.86658;9.61605;0.401481;30.3304;35.3004;34.7354;6.06621;36.9287;21.6641;22.451;6.38914;16.8616;48.0248;36.2687;22.0766;0.0904144;0.147057;20.05819333333333;28.83;0.140946;17.77975;5.4276;0.732749;4.71298;27.2489;23.027;16.7895;15.499569999999999;9.66871;20.3319	21.33885;24.0738;2.76025;2.85924;0.0843416;20.3727;22.8512;22.5803;0.185991;23.617;15.6676;15.9613;2.35873;12.6203;29.3052;24.0101;15.7357;0.0374753;0.0493054;12.044102500000001;20.5359;0.0512492;13.021999999999998;2.0834;0.0943336;0.11957;18.7215;16.181649999999998;12.3882;9.02697;0.0550111;14.7989	61.50750000000001;83.0684;20.2174;27.9604;500000.0;58.51;76.5826;74.2881;16.8801;83.6043;34.7079;37.1795;15.8599;24.9819;50.2806;77.0796;36.3291;0.594918;13.512;8333364.1421;49.6939;13.316;27.471249999999998;14.844;18.0087;14.7999;49.2941;39.02565;25.4932;30.4732;31.8289;32.0222	36	2	31	688283;266730;299857;171402;292728;171518;171400;64305;24297;24539;58819;286896;501907;364070;362676;299194;363285;286954;293989;191574;246074;24296;24552;63867;24894;24299;25426;25303;29441;24311;83472	1396300_at,1396301_x_at;1390591_at;1388695_at;1388108_at;1387993_at;1387949_at;1387630_at;1387314_at;1387243_at;1386965_at;1386958_at;1382843_at;1381852_at;1380561_at;1379367_at;1384345_at;1374524_at;1370698_at;1370580_a_at;1370563_at,1370708_a_at,1396933_s_at;1370355_at;1370269_at;1370067_at,1370870_at;1369850_at;1387511_at;1369136_at;1368990_at;1368497_at;1368213_at,1387109_at;1368064_a_at;1367…	18.4276	17.7797	13.6202	11.5939
GO:0006090	8	pyruvate metabolic process	50	53	2	2	2	0.93061	0.24585	0.24585	3.77	24552;24651	Me1;Pklr	1370067_at,1370870_at;1368651_at,1387263_at		20.4034	20.4034	17.7797	3.71037	19.8543	3.62821	14.6018	14.6018	13.022	2.23421	14.2712	2.18474	33.2484	33.2484	27.4712	8.17019	32.0395	7.98929					17.77975;23.027	13.021999999999998;16.181649999999998	27.471249999999998;39.02565	2	2	1	24552	1370067_at,1370870_at	17.7797	17.7797		13.022
GO:0006091	4	generation of precursor metabolites and energy	226	253	9	9	9	0.984	0.038923	0.048723	3.56	296086;24297;58819;100361188;305234;24536;24651;29441;64045	Ndufaf1;Cyp1a2;Txnrd1;Lyrm5;Stbd1;Lepr;Pklr;Por;Glrx	1393689_at;1387243_at;1386958_at;1374505_at;1372602_at;1370604_at,1370605_s_at,1371223_a_at,1388232_a_at;1368651_at,1387263_at;1368213_at,1387109_at;1367705_at,1386908_at	24536(-0.2274)	16.4448	15.624	6.06621	6.83111	15.4206	7.48545	9.85214	9.75101	0.185991	6.71276	8.44162	7.14304	708363	32.8456	16.8801	2.125e+06	1.11525e+06	2.56885e+06					24.8909;6.06621;21.6641;20.4847;6.36817;14.379010000000001;23.027;15.499569999999999;15.623975	17.3947;0.185991;15.6676;14.7599;0.255943;5.44549525;16.181649999999998;9.02697;9.751014999999999	43.0405;16.8801;34.7079;32.8456;18.8269;6375024.07585;39.02565;30.4732;29.54275	9	6	7	296086;24297;58819;100361188;305234;29441;64045	1393689_at;1387243_at;1386958_at;1374505_at;1372602_at;1368213_at,1387109_at;1367705_at,1386908_at	15.7997	15.624	7.33492	9.57745
GO:0006096	7	glycolytic process	27	30	1	1	1	0.89955	0.41934	0.41934	3.33	24651	Pklr	1368651_at,1387263_at		23.027	23.027	23.027		23.027		16.1816	16.1816	16.1816		16.1816		39.0256	39.0256	39.0256		39.0256						23.027	16.1816	39.0256	0	2	0
GO:0006108	8	malate metabolic process	7	7	1	1	1	0.99366	0.11902	0.11902	14.29	24552	Me1	1370067_at,1370870_at		17.7797	17.7797	17.7797		17.7797		13.022	13.022	13.022		13.022		27.4712	27.4712	27.4712		27.4712		0	17.7797	0	17.7797	17.7797	13.022	27.4712	2	0	1	24552	1370067_at,1370870_at	17.7797	17.7797		13.022
GO:0006109	6	regulation of carbohydrate metabolic process	149	158	6	6	6	0.9762	0.065139	0.065139	3.8	361643;60336;291132;314312;24536;24484	Lcmt1;Arpp19;Gpld1;Entpd5;Lepr;Igfbp3	1388747_at;1394318_at;1380833_at;1372774_at,1382434_at,1382544_at;1370604_at,1370605_s_at,1371223_a_at,1388232_a_at;1367652_at	24536(-0.2274)	21.9573	22.0724	9.29434	9.61225	19.7627	9.03138	13.5276	14.6212	4.33067	7.48389	12.0659	7.25248	1.06254e+06	44.7217	24.0279	2.60257e+06	1.08316e+06	2.62261e+06					23.1385;27.3981;9.29434;21.006220000000003;14.379010000000001;36.5276	16.3715;19.1059;4.33067;12.870903333333333;5.44549525;23.0409	38.7737;48.4149;24.0279;41.02843333333333;6375024.07585;84.1046	4	7	2	60336;314312	1394318_at;1372774_at,1382434_at,1382544_at	24.2022	24.2022	4.51974	15.9884
GO:0006110	7	regulation of glycolytic process	35	36	1	1	1	0.86412	0.47924	0.47924	2.78	314312	Entpd5	1372774_at,1382434_at,1382544_at		21.0062	21.0062	21.0062		21.0062		12.8709	12.8709	12.8709		12.8709		41.0284	41.0284	41.0284		41.0284						21.0062	12.8709	41.0284	3	0	1	314312	1372774_at,1382434_at,1382544_at	21.0062	21.0062		12.8709
GO:0006111	7	regulation of gluconeogenesis	44	45	2	2	2	0.95343	0.19299	0.19299	4.44	60336;24536	Arpp19;Lepr	1394318_at;1370604_at,1370605_s_at,1371223_a_at,1388232_a_at	24536(-0.2274)	20.8886	20.8886	14.379	9.20589	19.8614	9.09056	12.2757	12.2757	5.4455	9.65936	11.198	9.53836	3.18754e+06	3.18754e+06	48.4149	4.50779e+06	3.69049e+06	4.45132e+06					27.3981;14.379010000000001	19.1059;5.44549525	48.4149;6375024.07585	1	4	1	60336	1394318_at	27.3981	27.3981		19.1059
GO:0006112	5	energy reserve metabolic process	51	54	1	1	1	0.74749	0.62446	0.62446	1.85	305234	Stbd1	1372602_at		6.36817	6.36817	6.36817		6.36817		0.255943	0.255943	0.255943		0.255943		18.8269	18.8269	18.8269		18.8269						6.36817	0.255943	18.8269	1	0	1	305234	1372602_at	6.36817	6.36817		0.255943
GO:0006120	6	mitochondrial electron transport, NADH to ubiquinone	13	18	1	1	1	0.95942	0.27819	0.27819	5.56	296086	Ndufaf1	1393689_at		24.8909	24.8909	24.8909		24.8909		17.3947	17.3947	17.3947		17.3947		43.0405	43.0405	43.0405		43.0405		0	24.8909			24.8909	17.3947	43.0405	1	0	1	296086	1393689_at	24.8909	24.8909		17.3947
GO:0006139	4	nucleobase-containing compound metabolic process	2355	2513	32	32	32	0.014781	0.99083	0.02884	1.27	688283;305844;295160;307395;297768;298490;64305;58819;297783;363017;298884;311078;311021;364070;360481;309957;309544;363465;314312;192281;58919;117514;25357;29516;25690;25426;171129;56759;24651;81813;83472;83619	Afmid;Rnase1l2;Mnd1;Ablim3;Lactb2;Ppcs;Sult1b1;Txnrd1;Mybl1;Taf1d;Gen1;Psmd14;Nmi;Iars2;Dnaja3;Mef2a;Rbm20;Pir;Entpd5;Oas1a;Ccnd1;Txnip;Thrsp;Pde3b;Ahr;Cyp1b1;Uggt1;Rnase4;Pklr;Klf10;Ugdh;Nfe2l2	1396300_at,1396301_x_at;1393026_at;1391626_at;1390255_at;1389551_at;1388756_at;1387314_at;1386958_at;1385132_at;1385109_at;1384102_at;1386073_at;1381875_at;1380561_at;1378392_at;1378360_at;1391810_at;1377662_at;1372774_at,1382434_at,1382544_at;1371152_a_at;1371150_at,1371643_at,1383075_at;1371131_a_at;1371400_at;1369157_at;1369146_a_at;1368990_at;1368953_at;1368943_at;1368651_at,1387263_at;136865…	363017(-0.3027)	22.2776	24.2914	0.130311	12.4888	20.2074	12.3952	14.8952	16.9781	0.0308581	8.4306	13.5724	8.41612	1.57817e+06	48.6958	14.6268	6.14489e+06	3.04918e+06	8.29533e+06					31.613799999999998;0.130311;6.70004;0.269704;17.3415;18.8759;34.7354;21.6641;30.3994;48.7874;33.6809;39.2949;0.230619;16.8616;31.2133;33.9069;26.7666;17.8188;21.006220000000003;28.5593;15.557466666666665;28.4676;37.6874;27.3061;0.487373;27.2489;25.5557;7.72749;23.027;31.0897;20.3319;8.54018	21.33885;0.0308581;2.2455;0.064511;12.752;13.7458;22.5803;15.6676;20.4086;31.8194;21.1562;25.1873;0.0445238;12.6203;20.8292;21.8155;18.4547;13.0639;12.870903333333333;19.4349;11.556399999999998;19.3855;24.9041;19.0667;0.0641274;18.7215;17.7745;4.85547;16.181649999999998;20.7657;14.7989;2.44081	61.50750000000001;500000.0;16.9955;14.6268;26.5328;29.5271;74.2881;34.7079;58.7317;58.59;75.2628;92.2647;2.5E7;24.9819;61.4029;72.9728;47.9633;27.4474;41.02843333333333;53.0563;23.282066666666665;52.7858;81.9872;48.0975;2.5E7;49.2941;44.7408;17.1691;39.02565;60.9906;32.0222;23.1149	26	12	23	688283;305844;295160;297768;298490;64305;58819;297783;311078;311021;364070;360481;309544;363465;314312;192281;25357;29516;25690;25426;171129;83472;83619	1396300_at,1396301_x_at;1393026_at;1391626_at;1389551_at;1388756_at;1387314_at;1386958_at;1385132_at;1386073_at;1381875_at;1380561_at;1378392_at;1391810_at;1377662_at;1372774_at,1382434_at,1382544_at;1371152_a_at;1371400_at;1369157_at;1369146_a_at;1368990_at;1368953_at;1367938_at;1367826_at	21.3204	21.6641	11.6545	14.3063
GO:0006140	6	regulation of nucleotide metabolic process	88	92	3	3	3	0.91661	0.22847	0.22847	3.26	299857;314312;24552	Shmt2;Entpd5;Me1	1388695_at;1372774_at,1382434_at,1382544_at;1370067_at,1370870_at		15.5509	17.7797	7.86658	6.84752	16.4791	6.27486	9.55105	12.8709	2.76025	5.88149	10.4365	5.38115	29.5724	27.4712	20.2174	10.5634	30.4935	10.1797					7.86658;21.006220000000003;17.77975	2.76025;12.870903333333333;13.021999999999998	20.2174;41.02843333333333;27.471249999999998	6	0	3	299857;314312;24552	1388695_at;1372774_at,1382434_at,1382544_at;1370067_at,1370870_at	15.5509	17.7797	6.84752	9.55105
GO:0006163	6	purine nucleotide metabolic process	279	297	6	6	6	0.71522	0.44236	0.65853	2.02	298490;64305;314312;192281;29516;24651	Ppcs;Sult1b1;Entpd5;Oas1a;Pde3b;Pklr	1388756_at;1387314_at;1372774_at,1382434_at,1382544_at;1371152_a_at;1369157_at;1368651_at,1387263_at		25.585	25.1666	18.8759	5.79757	27.2274	5.94707	17.3134	17.6242	12.8709	3.71644	18.215	3.89282	47.5038	44.563	29.5271	15.3984	52.1607	16.1114					18.8759;34.7354;21.006220000000003;28.5593;27.3061;23.027	13.7458;22.5803;12.870903333333333;19.4349;19.0667;16.181649999999998	29.5271;74.2881;41.02843333333333;53.0563;48.0975;39.02565	7	2	5	298490;64305;314312;192281;29516	1388756_at;1387314_at;1372774_at,1382434_at,1382544_at;1371152_a_at;1369157_at	26.0966	27.3061	6.32865	17.5397
GO:0006164	7	purine nucleotide biosynthetic process	143	155	3	3	3	0.69715	0.5286	0.75846	1.94	298490;192281;24651	Ppcs;Oas1a;Pklr	1388756_at;1371152_a_at;1368651_at,1387263_at		23.4874	23.027	18.8759	4.85809	24.033	4.37092	16.4541	16.1816	13.7458	2.85432	16.7743	2.56844	40.5363	39.0256	29.5271	11.8371	41.7864	10.72					18.8759;28.5593;23.027	13.7458;19.4349;16.181649999999998	29.5271;53.0563;39.02565	2	2	2	298490;192281	1388756_at;1371152_a_at	23.7176	23.7176	6.8472	16.5904
GO:0006165	7	nucleoside diphosphate phosphorylation	41	44	1	1	1	0.81352	0.54964	0.54964	2.27	24651	Pklr	1368651_at,1387263_at		23.027	23.027	23.027		23.027		16.1816	16.1816	16.1816		16.1816		39.0256	39.0256	39.0256		39.0256						23.027	16.1816	39.0256	0	2	0
GO:0006195	7	purine nucleotide catabolic process	30	32	1	1	1	0.88805	0.44003	0.44003	3.12	29516	Pde3b	1369157_at		27.3061	27.3061	27.3061		27.3061		19.0667	19.0667	19.0667		19.0667		48.0975	48.0975	48.0975		48.0975						27.3061	19.0667	48.0975	1	0	1	29516	1369157_at	27.3061	27.3061		19.0667
GO:0006198	8	cAMP catabolic process	9	10	1	1	1	0.98689	0.16561	0.16561	10	29516	Pde3b	1369157_at		27.3061	27.3061	27.3061		27.3061		19.0667	19.0667	19.0667		19.0667		48.0975	48.0975	48.0975		48.0975		0	27.3061	0	27.3061	27.3061	19.0667	48.0975	1	0	1	29516	1369157_at	27.3061	27.3061		19.0667
GO:0006259	5	DNA metabolic process	499	527	5	5	5	0.084345	0.96267	0.17679	0.95	295160;298884;311078;360481;25426	Mnd1;Gen1;Psmd14;Dnaja3;Cyp1b1	1391626_at;1384102_at;1386073_at;1378392_at;1368990_at		27.6276	31.2133	6.70004	12.4873	29.4563	6.37012	17.6279	20.8292	2.2455	8.91145	19.3617	4.23464	59.044	61.4029	16.9955	28.4401	59.4951	17.3216					6.70004;33.6809;39.2949;31.2133;27.2489	2.2455;21.1562;25.1873;20.8292;18.7215	16.9955;75.2628;92.2647;61.4029;49.2941	4	1	4	295160;311078;360481;25426	1391626_at;1386073_at;1378392_at;1368990_at	26.1143	29.2311	13.8796	16.7459
GO:0006260	6	DNA replication	95	97	1	1	1	0.4781	0.82835	1	1.03	360481	Dnaja3	1378392_at		31.2133	31.2133	31.2133		31.2133		20.8292	20.8292	20.8292		20.8292		61.4029	61.4029	61.4029		61.4029						31.2133	20.8292	61.4029	1	0	1	360481	1378392_at	31.2133	31.2133		20.8292
GO:0006261	7	DNA-dependent DNA replication	35	35	1	1	1	0.87021	0.4697	0.4697	2.86	360481	Dnaja3	1378392_at		31.2133	31.2133	31.2133		31.2133		20.8292	20.8292	20.8292		20.8292		61.4029	61.4029	61.4029		61.4029						31.2133	20.8292	61.4029	1	0	1	360481	1378392_at	31.2133	31.2133		20.8292
GO:0006264	7	mitochondrial DNA replication	10	10	1	1	1	0.98689	0.16561	0.16561	10	360481	Dnaja3	1378392_at		31.2133	31.2133	31.2133		31.2133		20.8292	20.8292	20.8292		20.8292		61.4029	61.4029	61.4029		61.4029		0	31.2133	0	31.2133	31.2133	20.8292	61.4029	1	0	1	360481	1378392_at	31.2133	31.2133		20.8292
GO:0006281	6	DNA repair	291	304	2	2	2	0.08677	0.97449	0.18394	0.66	298884;311078	Gen1;Psmd14	1384102_at;1386073_at		36.4879	36.4879	33.6809	3.9697	34.2545	2.40457	23.1717	23.1717	21.1562	2.85042	21.568	1.72659	83.7638	83.7638	75.2628	12.0222	76.9998	7.28221					33.6809;39.2949	21.1562;25.1873	75.2628;92.2647	1	1	1	311078	1386073_at	39.2949	39.2949		25.1873
GO:0006302	7	double-strand break repair	123	126	2	2	2	0.60575	0.66395	1	1.59	298884;311078	Gen1;Psmd14	1384102_at;1386073_at		36.4879	36.4879	33.6809	3.9697	34.2545	2.40457	23.1717	23.1717	21.1562	2.85042	21.568	1.72659	83.7638	83.7638	75.2628	12.0222	76.9998	7.28221					33.6809;39.2949	21.1562;25.1873	75.2628;92.2647	1	1	1	311078	1386073_at	39.2949	39.2949		25.1873
GO:0006303	8	double-strand break repair via nonhomologous end joining	29	30	1	1	1	0.89955	0.41934	0.41934	3.33	311078	Psmd14	1386073_at		39.2949	39.2949	39.2949		39.2949		25.1873	25.1873	25.1873		25.1873		92.2647	92.2647	92.2647		92.2647						39.2949	25.1873	92.2647	1	0	1	311078	1386073_at	39.2949	39.2949		25.1873
GO:0006304	6	DNA modification	47	48	1	1	1	0.78733	0.5812	0.5812	2.08	25426	Cyp1b1	1368990_at		27.2489	27.2489	27.2489		27.2489		18.7215	18.7215	18.7215		18.7215		49.2941	49.2941	49.2941		49.2941						27.2489	18.7215	49.2941	1	0	1	25426	1368990_at	27.2489	27.2489		18.7215
GO:0006308	6	DNA catabolic process	20	21	1	1	1	0.94621	0.31639	0.31639	4.76	298884	Gen1	1384102_at		33.6809	33.6809	33.6809		33.6809		21.1562	21.1562	21.1562		21.1562		75.2628	75.2628	75.2628		75.2628						33.6809	21.1562	75.2628	0	1	0
GO:0006310	6	DNA recombination	128	134	3	3	3	0.77984	0.43267	0.51999	2.24	295160;298884;311078	Mnd1;Gen1;Psmd14	1391626_at;1384102_at;1386073_at		26.5586	33.6809	6.70004	17.4256	31.5043	10.3067	16.1963	21.1562	2.2455	12.2487	19.6395	7.23398	61.5077	75.2628	16.9955	39.4749	71.0109	22.8264					6.70004;33.6809;39.2949	2.2455;21.1562;25.1873	16.9955;75.2628;92.2647	2	1	2	295160;311078	1391626_at;1386073_at	22.9975	22.9975	23.048	13.7164
GO:0006325	4	chromatin organization	465	523	1	1	1	0.00069455	0.99994	0.0011702	0.19	302935	Ubn1	1381878_at	302935(0.4456)	45.61	45.61	45.61		45.61		27.3568	27.3568	27.3568		27.3568		135.509	135.509	135.509		135.509						45.61	27.3568	135.509	0	1	0
GO:0006333	5	chromatin assembly or disassembly	35	46	1	1	1	0.80048	0.5657	0.5657	2.17	302935	Ubn1	1381878_at	302935(0.4456)	45.61	45.61	45.61		45.61		27.3568	27.3568	27.3568		27.3568		135.509	135.509	135.509		135.509						45.61	27.3568	135.509	0	1	0
GO:0006334	6	nucleosome assembly	52	69	1	1	1	0.64811	0.71412	1	1.45	302935	Ubn1	1381878_at	302935(0.4456)	45.61	45.61	45.61		45.61		27.3568	27.3568	27.3568		27.3568		135.509	135.509	135.509		135.509						45.61	27.3568	135.509	0	1	0
GO:0006336	7	DNA replication-independent nucleosome assembly	12	21	1	1	1	0.94621	0.31639	0.31639	4.76	302935	Ubn1	1381878_at	302935(0.4456)	45.61	45.61	45.61		45.61		27.3568	27.3568	27.3568		27.3568		135.509	135.509	135.509		135.509						45.61	27.3568	135.509	0	1	0
GO:0006351	7	transcription, DNA-templated	920	976	12	12	12	0.10003	0.94083	0.20784	1.23	307395;297783;363017;311021;309957;363465;58919;117514;25357;25690;81813;83619	Ablim3;Mybl1;Taf1d;Nmi;Mef2a;Pir;Ccnd1;Txnip;Thrsp;Ahr;Klf10;Nfe2l2	1390255_at;1385132_at;1385109_at;1381875_at;1378360_at;1377662_at;1371150_at,1371643_at,1383075_at;1371131_a_at;1371400_at;1369146_a_at;1368650_at;1367826_at	363017(-0.3027)	21.1035	23.1432	0.230619	16.3481	16.3114	14.9914	13.8611	16.2247	0.0445238	11.0237	10.7788	10.2198	4.16671e+06	58.6608	14.6268	9.73122e+06	6.78825e+06	1.16131e+07					0.269704;30.3994;48.7874;0.230619;33.9069;17.8188;15.557466666666665;28.4676;37.6874;0.487373;31.0897;8.54018	0.064511;20.4086;31.8194;0.0445238;21.8155;13.0639;11.556399999999998;19.3855;24.9041;0.0641274;20.7657;2.44081	14.6268;58.7317;58.59;2.5E7;72.9728;27.4474;23.282066666666665;52.7858;81.9872;2.5E7;60.9906;23.1149	6	8	6	297783;311021;363465;25357;25690;83619	1385132_at;1381875_at;1377662_at;1371400_at;1369146_a_at;1367826_at	15.8606	13.1795	15.6579	10.1543
GO:0006355	7	regulation of transcription, DNA-templated	2306	2455	30	29	29	0.0052011	0.99702	0.010816	1.18	685691;297989;307395;406164;288985;288444;297783;363017;301431;360481;309957;305888;289264;363465;289185;94268;494344;58919;117514;29199;294270;25357;25476;64558;25690;29200;25426;81813;83619	Eid2;Ddx58;Ablim3;Pbx2;Insig2;Hsph1;Mybl1;Taf1d;Nif3l1;Dnaja3;Mef2a;Zfhx2;Grem2;Pir;Creg1;Efna1;Ier2;Ccnd1;Txnip;Hfe;RT1-Db1;Thrsp;Lgals9;Fzd4;Ahr;Inhba;Cyp1b1;Klf10;Nfe2l2	1393058_at;1391463_at;1390255_at;1389432_at;1389377_at,1393690_at;1385620_at,1388898_at;1385132_at;1385109_at;1383289_at;1378392_at;1378360_at;1390368_at;1380799_at;1377662_at;1375428_at;1372844_at;1372389_at;1371150_at,1371643_at,1383075_at;1371131_a_at;1370772_a_at;1370382_at,1370383_s_at;1371400_at;1387027_a_at;1369468_at;1369146_a_at;1369012_at,1383486_at;1368990_at;1368650_at;1367826_at	363017(-0.3027);301431(0.199);305888(-0.1592);289185(0.2709);64558(0.3921)	21.6738	24.7896	0.056018	13.8971	11.4267		14.1709	17.5606	1.15429e-07	9.48652	0.0858801		2.61211e+06	53.349	14.6268	7.74007e+06	497346						25.2334;19.5705;0.269704;11.7221;18.81295;25.281950000000002;30.3994;48.7874;16.051;31.2133;33.9069;0.056018;41.7887;17.8188;11.4377;24.7896;7.3339;15.557466666666665;28.4676;35.2166;4.6979455;37.6874;36.5565;0.0781713;0.487373;38.44015;27.2489;31.0897;8.54018	17.5909;14.1871;0.064511;8.8494;13.64725;17.9119;20.4086;31.8194;11.8964;20.8292;21.8155;2.77822E-7;26.3981;13.0639;0.102643;17.5606;3.92869;11.556399999999998;19.3855;22.8112;2.6781043;24.9041;23.4439;1.15429E-7;0.0641274;24.11155;18.7215;20.7657;2.44081	43.9106;30.9363;14.6268;16.903;29.77735;42.88935;58.7317;58.59;24.132;61.4029;72.9728;2.5E7;105.191;27.4474;500000.0;41.8713;16.7655;23.282066666666665;52.7858;76.2381;250023.52665;81.9872;81.9429;2.5E7;2.5E7;53.34895;49.2941;60.9906;23.1149	22	13	19	685691;297989;288985;288444;297783;301431;360481;289264;363465;289185;94268;29199;294270;25357;25476;64558;25690;25426;83619	1393058_at;1391463_at;1389377_at,1393690_at;1385620_at,1388898_at;1385132_at;1383289_at;1378392_at;1380799_at;1377662_at;1375428_at;1372844_at;1370772_a_at;1370382_at,1370383_s_at;1371400_at;1387027_a_at;1369468_at;1369146_a_at;1368990_at;1367826_at	21.7321	24.7896	12.5593	14.14
GO:0006357	8	regulation of transcription by RNA polymerase II	1566	1642	20	20	20	0.032486	0.98065	0.058583	1.22	685691;297989;307395;406164;288985;288444;297783;360481;309957;305888;289264;94268;494344;58919;117514;29199;25690;29200;81813;83619	Eid2;Ddx58;Ablim3;Pbx2;Insig2;Hsph1;Mybl1;Dnaja3;Mef2a;Zfhx2;Grem2;Efna1;Ier2;Ccnd1;Txnip;Hfe;Ahr;Inhba;Klf10;Nfe2l2	1393058_at;1391463_at;1390255_at;1389432_at;1389377_at,1393690_at;1385620_at,1388898_at;1385132_at;1378392_at;1378360_at;1390368_at;1380799_at;1372844_at;1372389_at;1371150_at,1371643_at,1383075_at;1371131_a_at;1370772_a_at;1369146_a_at;1369012_at,1383486_at;1368650_at;1367826_at	305888(-0.1592)	21.4089	25.0115	0.056018	13.0912	18.957	13.176	14.2164	17.5757	2.77822e-07	8.73352	12.6006	9.04133	2.50004e+06	48.3482	14.6268	7.69482e+06	3.42839e+06	8.82311e+06					25.2334;19.5705;0.269704;11.7221;18.81295;25.281950000000002;30.3994;31.2133;33.9069;0.056018;41.7887;24.7896;7.3339;15.557466666666665;28.4676;35.2166;0.487373;38.44015;31.0897;8.54018	17.5909;14.1871;0.064511;8.8494;13.64725;17.9119;20.4086;20.8292;21.8155;2.77822E-7;26.3981;17.5606;3.92869;11.556399999999998;19.3855;22.8112;0.0641274;24.11155;20.7657;2.44081	43.9106;30.9363;14.6268;16.903;29.77735;42.88935;58.7317;61.4029;72.9728;2.5E7;105.191;41.8713;16.7655;23.282066666666665;52.7858;76.2381;2.5E7;53.34895;60.9906;23.1149	13	12	11	685691;297989;288985;288444;297783;360481;289264;94268;29199;25690;83619	1393058_at;1391463_at;1389377_at,1393690_at;1385620_at,1388898_at;1385132_at;1378392_at;1380799_at;1372844_at;1370772_a_at;1369146_a_at;1367826_at	23.7576	25.2334	11.7335	15.8045
GO:0006366	8	transcription by RNA polymerase II	354	368	6	6	6	0.50858	0.65077	1	1.63	297783;311021;309957;25690;81813;83619	Mybl1;Nmi;Mef2a;Ahr;Klf10;Nfe2l2	1385132_at;1381875_at;1378360_at;1369146_a_at;1368650_at;1367826_at		17.4424	19.4698	0.230619	16.051	12.6478	15.837	10.9232	11.4247	0.0445238	11.0789	7.8489	10.7517	8.33337e+06	66.9817	23.1149	1.29099e+07	1.27304e+07	1.36907e+07					30.3994;0.230619;33.9069;0.487373;31.0897;8.54018	20.4086;0.0445238;21.8155;0.0641274;20.7657;2.44081	58.7317;2.5E7;72.9728;2.5E7;60.9906;23.1149	4	2	4	297783;311021;25690;83619	1385132_at;1381875_at;1369146_a_at;1367826_at	9.91439	4.51378	14.1912	5.73952
GO:0006396	7	RNA processing	509	553	1	1	1	0.00041539	0.99996	0.00081067	0.18	309544	Rbm20	1391810_at		26.7666	26.7666	26.7666		26.7666		18.4547	18.4547	18.4547		18.4547		47.9633	47.9633	47.9633		47.9633						26.7666	18.4547	47.9633	1	0	1	309544	1391810_at	26.7666	26.7666		18.4547
GO:0006397	8	mRNA processing	245	263	1	1	1	0.048117	0.99185	0.095855	0.38	309544	Rbm20	1391810_at		26.7666	26.7666	26.7666		26.7666		18.4547	18.4547	18.4547		18.4547		47.9633	47.9633	47.9633		47.9633						26.7666	18.4547	47.9633	1	0	1	309544	1391810_at	26.7666	26.7666		18.4547
GO:0006399	8	tRNA metabolic process	136	139	1	1	1	0.28426	0.92031	0.52359	0.72	364070	Iars2	1380561_at		16.8616	16.8616	16.8616		16.8616		12.6203	12.6203	12.6203		12.6203		24.9819	24.9819	24.9819		24.9819						16.8616	12.6203	24.9819	1	0	1	364070	1380561_at	16.8616	16.8616		12.6203
GO:0006412	6	translation	122	187	1	1	1	0.14764	0.96695	0.26797	0.53	364070	Iars2	1380561_at		16.8616	16.8616	16.8616		16.8616		12.6203	12.6203	12.6203		12.6203		24.9819	24.9819	24.9819		24.9819						16.8616	12.6203	24.9819	1	0	1	364070	1380561_at	16.8616	16.8616		12.6203
GO:0006417	7	regulation of translation	253	268	3	3	3	0.28783	0.86328	0.63729	1.12	299857;25426;80881	Shmt2;Cyp1b1;Serp1	1388695_at;1368990_at;1386900_at		22.5229	27.2489	7.86658	12.9567	24.6391	10.9098	14.3133	18.7215	2.76025	10.0984	16.1417	8.55124	45.0639	49.2941	20.2174	23.0248	47.7643	19.3367					7.86658;27.2489;32.4532	2.76025;18.7215;21.4582	20.2174;49.2941;65.6803	3	0	3	299857;25426;80881	1388695_at;1368990_at;1386900_at	22.5229	27.2489	12.9567	14.3133
GO:0006418	9	tRNA aminoacylation for protein translation	39	41	1	1	1	0.83284	0.52442	0.52442	2.44	364070	Iars2	1380561_at		16.8616	16.8616	16.8616		16.8616		12.6203	12.6203	12.6203		12.6203		24.9819	24.9819	24.9819		24.9819						16.8616	12.6203	24.9819	1	0	1	364070	1380561_at	16.8616	16.8616		12.6203
GO:0006428	10	isoleucyl-tRNA aminoacylation	2	2	1	1	1	0.99968	0.035551	0.035551	50	364070	Iars2	1380561_at		16.8616	16.8616	16.8616		16.8616		12.6203	12.6203	12.6203		12.6203		24.9819	24.9819	24.9819		24.9819		0	16.8616	0	16.8616	16.8616	12.6203	24.9819	1	0	1	364070	1380561_at	16.8616	16.8616		12.6203
GO:0006450	4	regulation of translational fidelity	17	18	1	1	1	0.95942	0.27819	0.27819	5.56	364070	Iars2	1380561_at		16.8616	16.8616	16.8616		16.8616		12.6203	12.6203	12.6203		12.6203		24.9819	24.9819	24.9819		24.9819		0	16.8616			16.8616	12.6203	24.9819	1	0	1	364070	1380561_at	16.8616	16.8616		12.6203
GO:0006457	3	protein folding	124	140	6	6	6	0.9869	0.040329	0.040329	4.29	288444;360481;314312;291671;171129;84491	Hsph1;Dnaja3;Entpd5;Hspa9;Uggt1;Qsox1	1385620_at,1388898_at;1378392_at;1372774_at,1382434_at,1382544_at;1389930_at;1368953_at;1368023_at,1368024_at		18.6206	23.1441	0.0171458	11.8512	20.4161	8.96515	12.0237	15.3227	2.85172e-09	8.67712	13.2006	7.45887	35.9328	41.9589	0.117549	20.9474	38.8991	12.9887					25.281950000000002;31.2133;21.006220000000003;0.01714575;25.5557;8.649445	17.9119;20.8292;12.870903333333333;2.85172E-9;17.7745;2.7557294999999997	42.88935;61.4029;41.02843333333333;0.1175485;44.7408;25.417749999999998	8	2	5	288444;360481;314312;291671;171129	1385620_at,1388898_at;1378392_at;1372774_at,1382434_at,1382544_at;1389930_at;1368953_at	20.6149	25.2819	12.0721	13.8773
GO:0006458	4	'de novo' protein folding	30	38	4	4	4	0.99945	0.0046128	0.0046128	10.53	288444;314312;291671;171129	Hsph1;Entpd5;Hspa9;Uggt1	1385620_at,1388898_at;1372774_at,1382434_at,1382544_at;1389930_at;1368953_at		17.9653	23.1441	0.0171458	12.1454	23.2617	6.29362	12.1393	15.3227	2.85172e-09	8.42568	15.9284	4.70293	32.194	41.9589	0.117549	21.438	41.1137	10.5879	0.5	10.5117	2.5	25.4188	25.281950000000002;21.006220000000003;0.01714575;25.5557	17.9119;12.870903333333333;2.85172E-9;17.7745	42.88935;41.02843333333333;0.1175485;44.7408	7	0	4	288444;314312;291671;171129	1385620_at,1388898_at;1372774_at,1382434_at,1382544_at;1389930_at;1368953_at	17.9653	23.1441	12.1454	12.1393
GO:0006464	6	cellular protein modification process	1941	2049	29	29	29	0.091003	0.93675	0.17305	1.42	312688;361643;299857;171125;294079;311078;287603;298693;308519;309957;313837;313278;298652;303735;680945;314312;294400;300211;58919;291671;60335;25476;171129;29441;24162;100912108;83619;80881;24484	Usp18;Lcmt1;Shmt2;Ptprh;March5;Psmd14;Tex14;Isg15;Dpy19l3;Mef2a;RGD1562284;Ptprd;Ube4b;Rnf213;Sdf2l1;Entpd5;Nus1;Fkbp11;Ccnd1;Hspa9;Tgm1;Lgals9;Uggt1;Por;Acp2;Nupr1;Nfe2l2;Serp1;Igfbp3	1389034_at;1388747_at;1388695_at;1387444_at;1385790_at;1386073_at;1382487_at;1382314_at;1379160_at,1393965_at;1378360_at;1377867_at;1376619_at;1374507_at,1376862_at;1374337_at;1373043_at;1372774_at,1382434_at,1382544_at;1392522_at;1372653_at;1371150_at,1371643_at,1383075_at;1389930_at;1370051_at;1387027_a_at;1368953_at;1368213_at,1387109_at;1367906_at;1367847_at;1367826_at;1386900_at;1367652_at	313278(-0.121);294400(0.1633)	23.8969	25.5557	0.0171458	12.8256	4.84198		14.7882	17.7745	2.85172e-09	8.8792	0.0909628		1.74143e+06	50.0632	0.117549	6.4429e+06	496816						5.23919;23.1385;7.86658;11.7156;37.9616;39.2949;4.86357;29.9319;35.0192;33.9069;22.0879;37.1251;21.3806;29.6021;46.4701;21.006220000000003;24.3346;0.440886;15.557466666666665;0.01714575;27.6837;36.5565;25.5557;15.499569999999999;27.523;35.7108;8.54018;32.4532;36.5276	0.185977;16.3715;2.76025;0.109207;24.0916;25.1873;0.107723;20.1643;22.612299999999998;21.8155;15.7425;23.7079;15.41795;19.9907;20.9139;12.870903333333333;17.0734;0.0613593;11.556399999999998;2.85172E-9;19.4656;23.4439;17.7745;9.02697;18.8722;22.5936;2.44081;21.4582;23.0409	15.8255;38.7737;20.2174;2.5E7;88.4033;92.2647;500000.0;57.2437;78.1673;72.9728;36.3545;84.495;34.380399999999995;56.2131;49.2709;41.02843333333333;41.6531;2.5E7;23.282066666666665;0.1175485;48.3628;81.9429;44.7408;30.4732;50.0632;80.9168;23.1149;65.6803;84.1046	26	10	21	312688;299857;171125;294079;311078;298693;308519;298652;303735;680945;314312;294400;300211;291671;60335;25476;171129;29441;24162;83619;80881	1389034_at;1388695_at;1387444_at;1385790_at;1386073_at;1382314_at;1379160_at,1393965_at;1374507_at,1376862_at;1374337_at;1373043_at;1372774_at,1382434_at,1382544_at;1392522_at;1372653_at;1389930_at;1370051_at;1387027_a_at;1368953_at;1368213_at,1387109_at;1367906_at;1367826_at;1386900_at	23.052	25.5557	13.3809	13.9963
GO:0006465	6	signal peptide processing	12	12	1	1	1	0.98122	0.19529	0.19529	8.33	116548	Pcsk5	1392773_at	116548(-0.2018)	24.5208	24.5208	24.5208		24.5208		17.1812	17.1812	17.1812		17.1812		42.1138	42.1138	42.1138		42.1138		0	24.5208			24.5208	17.1812	42.1138	1	0	1	116548	1392773_at	24.5208	24.5208		17.1812
GO:0006468	7	protein phosphorylation	620	641	6	6	6	0.054304	0.9759	0.12352	0.94	287603;309957;58919;291671;25476;24484	Tex14;Mef2a;Ccnd1;Hspa9;Lgals9;Igfbp3	1382487_at;1378360_at;1371150_at,1371643_at,1383075_at;1389930_at;1387027_a_at;1367652_at		21.2382	24.7322	0.0171458	16.6111	4.85984		13.3274	16.6859	2.85172e-09	11.1737	0.104804		83377.1	77.4578	0.117549	204103	500079						4.86357;33.9069;15.557466666666665;0.01714575;36.5565;36.5276	0.107723;21.8155;11.556399999999998;2.85172E-9;23.4439;23.0409	500000.0;72.9728;23.282066666666665;0.1175485;81.9429;84.1046	2	6	2	291671;25476	1389930_at;1387027_a_at	18.2868	18.2868	25.8372	11.722
GO:0006469	8	negative regulation of protein kinase activity	181	190	3	3	3	0.5552	0.66624	1	1.58	360481;299626;81613	Dnaja3;Gadd45b;Ceacam1	1378392_at;1372016_at;1374620_at,1382975_at		28.9728	30.4324	25.2726	3.22815	27.9487	3.31444	19.7778	20.4098	18.0945	1.47281	19.3054	1.50234	54.1848	59.101	42.0506	10.5714	50.8531	10.8928					31.2133;25.2726;30.432450000000003	20.8292;18.0945;20.409799999999997	61.4029;42.0506;59.101	4	0	3	360481;299626;81613	1378392_at;1372016_at;1374620_at,1382975_at	28.9728	30.4324	3.22815	19.7778
GO:0006470	7	protein dephosphorylation	154	165	3	3	3	0.6565	0.57104	0.77167	1.82	171125;313278;24162	Ptprh;Ptprd;Acp2	1387444_at;1376619_at;1367906_at	313278(-0.121)	25.4546	27.523	11.7156	12.8304	20.067	13.6119	14.2298	18.8722	0.109207	12.4655	8.37472	13.1577	8.33338e+06	84.495	50.0632	1.44337e+07	1.56046e+07	1.48296e+07					11.7156;37.1251;27.523	0.109207;23.7079;18.8722	2.5E7;84.495;50.0632	2	1	2	171125;24162	1387444_at;1367906_at	19.6193	19.6193	11.1775	9.4907
GO:0006473	8	protein acetylation	105	116	2	2	2	0.65462	0.61917	1	1.72	29441;100912108	Por;Nupr1	1368213_at,1387109_at;1367847_at		25.6052	25.6052	15.4996	14.2915	25.3977	14.2885	15.8103	15.8103	9.02697	9.59306	15.671	9.59103	55.695	55.695	30.4732	35.669	55.177	35.6615					15.499569999999999;35.7108	9.02697;22.5936	30.4732;80.9168	2	1	1	29441	1368213_at,1387109_at	15.4996	15.4996		9.02697
GO:0006475	9	internal protein amino acid acetylation	91	101	1	1	1	0.4563	0.84043	1	0.99	29441	Por	1368213_at,1387109_at		15.4996	15.4996	15.4996		15.4996		9.02697	9.02697	9.02697		9.02697		30.4732	30.4732	30.4732		30.4732						15.4996	9.02697	30.4732	2	0	1	29441	1368213_at,1387109_at	15.4996	15.4996		9.02697
GO:0006479	7	protein methylation	98	109	1	1	1	0.4148	0.8621	1	0.92	361643	Lcmt1	1388747_at		23.1385	23.1385	23.1385		23.1385		16.3715	16.3715	16.3715		16.3715		38.7737	38.7737	38.7737		38.7737						23.1385	16.3715	38.7737	0	1	0
GO:0006481	8	C-terminal protein methylation	2	2	1	1	1	0.99968	0.035551	0.035551	50	361643	Lcmt1	1388747_at		23.1385	23.1385	23.1385		23.1385		16.3715	16.3715	16.3715		16.3715		38.7737	38.7737	38.7737		38.7737		0	23.1385	0	23.1385	23.1385	16.3715	38.7737	0	1	0
GO:0006486	6	protein glycosylation	147	152	6	6	6	0.98027	0.056061	0.056061	3.95	308519;680945;314312;294400;171129;80881	Dpy19l3;Sdf2l1;Entpd5;Nus1;Uggt1;Serp1	1379160_at,1393965_at;1373043_at;1372774_at,1382434_at,1382544_at;1392522_at;1368953_at;1386900_at	294400(0.1633)	30.8065	29.0044	21.0062	9.28772	29.5751	8.45345	18.7839	19.3442	12.8709	3.61258	18.5272	3.54704	53.4235	47.0058	41.0284	15.1479	52.6376	14.8692					35.0192;46.4701;21.006220000000003;24.3346;25.5557;32.4532	22.612299999999998;20.9139;12.870903333333333;17.0734;17.7745;21.4582	78.1673;49.2709;41.02843333333333;41.6531;44.7408;65.6803	9	0	6	308519;680945;314312;294400;171129;80881	1379160_at,1393965_at;1373043_at;1372774_at,1382434_at,1382544_at;1392522_at;1368953_at;1386900_at	30.8065	29.0044	9.28772	18.7839
GO:0006487	7	protein N-linked glycosylation	43	46	2	2	2	0.95082	0.19952	0.19952	4.35	314312;171129	Entpd5;Uggt1	1372774_at,1382434_at,1382544_at;1368953_at		23.281	23.281	21.0062	3.21697	23.7689	3.14208	15.3227	15.3227	12.8709	3.46737	15.8487	3.38664	42.8846	42.8846	41.0284	2.62504	43.2828	2.56393					21.006220000000003;25.5557	12.870903333333333;17.7745	41.02843333333333;44.7408	4	0	2	314312;171129	1372774_at,1382434_at,1382544_at;1368953_at	23.281	23.281	3.21697	15.3227
GO:0006493	7	protein O-linked glycosylation	50	52	1	1	1	0.76081	0.61056	0.61056	1.92	680945	Sdf2l1	1373043_at		46.4701	46.4701	46.4701		46.4701		20.9139	20.9139	20.9139		20.9139		49.2709	49.2709	49.2709		49.2709						46.4701	20.9139	49.2709	1	0	1	680945	1373043_at	46.4701	46.4701		20.9139
GO:0006505	7	GPI anchor metabolic process	20	23	1	1	1	0.93668	0.34074	0.34074	4.35	291132	Gpld1	1380833_at		9.29434	9.29434	9.29434		9.29434		4.33067	4.33067	4.33067		4.33067		24.0279	24.0279	24.0279		24.0279						9.29434	4.33067	24.0279	0	1	0
GO:0006507	8	GPI anchor release	1	1	1	1	1	1	0.017936	0.017936	100	291132	Gpld1	1380833_at		9.29434	9.29434	9.29434		9.29434		4.33067	4.33067	4.33067		4.33067		24.0279	24.0279	24.0279		24.0279		0	9.29434	0	9.29434	9.29434	4.33067	24.0279	0	1	0
GO:0006508	5	proteolysis	819	877	24	22	22	0.95731	0.06911	0.11162	2.51	290802;296959;304608;300474;312688;299857;116548;25627;311078;298693;300803;298652;303735;680945;310670;292949;25697;25700;171129;81707;25481;83619	Ubxn8;Cpa2;Mmp19;Adamts15;Usp18;Shmt2;Pcsk5;Cma1;Psmd14;Isg15;Lactb;Ube4b;Rnf213;Sdf2l1;Adamtsl4;Perp;Ctsl;Ide;Uggt1;Mmp14;Mmp11;Nfe2l2	1397349_at;1393397_at;1391095_at;1390931_at;1389034_at;1388695_at;1392773_at;1387173_at;1386073_at;1382314_at;1375818_at;1374507_at,1376862_at;1374337_at;1373043_at;1372426_at;1389177_at;1370244_at;1387652_at;1368953_at;1367860_a_at;1367858_at;1367826_at	116548(-0.2018)	21.4107	25.0383	0.0171458	14.7607	20.5	13.7952	13.0104	17.4779	2.85172e-09	9.98814	12.6352	9.32921	2.27277e+06	51.8713	0.117549	7.35611e+06	2.36619e+06	7.49034e+06					3.99879;29.9005;29.5192;9.32139;5.23919;7.86658;24.5208;0.01714575;39.2949;29.9319;39.5417;21.3806;29.6021;46.4701;35.1211;31.4104;0.119104;15.7599;25.5557;37.5583;0.365629;8.54018	0.0301446;19.5447;20.2773;0.0394699;0.185977;2.76025;17.1812;2.85172E-9;25.1873;20.1643;25.2576;15.41795;19.9907;20.9139;22.3289;20.9301;0.0377096;11.7975;17.7745;23.9073;0.0613385;2.44081	14.9498;60.1257;54.4716;2.5E7;15.8255;20.2174;42.1138;0.1175485;92.2647;57.2437;93.6454;34.380399999999995;56.2131;49.2709;78.3307;62.0658;4.56418;23.2687;44.7408;86.4955;2.5E7;23.1149	17	6	16	290802;304608;312688;299857;116548;311078;298693;300803;298652;303735;680945;292949;25697;25700;171129;83619	1397349_at;1391095_at;1389034_at;1388695_at;1392773_at;1386073_at;1382314_at;1375818_at;1374507_at,1376862_at;1374337_at;1373043_at;1389177_at;1370244_at;1387652_at;1368953_at;1367826_at	22.4219	25.0383	14.1222	13.7717
GO:0006511	8	ubiquitin-dependent protein catabolic process	350	368	6	6	6	0.50858	0.65077	1	1.63	290802;312688;311078;298652;303735;83619	Ubxn8;Usp18;Psmd14;Ube4b;Rnf213;Nfe2l2	1397349_at;1389034_at;1386073_at;1374507_at,1376862_at;1374337_at;1367826_at		18.0093	14.9604	3.99879	14.4767	13.0617	10.2608	10.5421	8.92938	0.0301446	11.0536	6.89463	8.69715	39.4581	28.7476	14.9498	30.0709	27.9796	18.0315					3.99879;5.23919;39.2949;21.3806;29.6021;8.54018	0.0301446;0.185977;25.1873;15.41795;19.9907;2.44081	14.9498;15.8255;92.2647;34.380399999999995;56.2131;23.1149	7	0	6	290802;312688;311078;298652;303735;83619	1397349_at;1389034_at;1386073_at;1374507_at,1376862_at;1374337_at;1367826_at	18.0093	14.9604	14.4767	10.5421
GO:0006513	10	protein monoubiquitination	51	54	1	1	1	0.74749	0.62446	0.62446	1.85	298652	Ube4b	1374507_at,1376862_at		21.3806	21.3806	21.3806		21.3806		15.4179	15.4179	15.4179		15.4179		34.3804	34.3804	34.3804		34.3804						21.3806	15.4179	34.3804	2	0	1	298652	1374507_at,1376862_at	21.3806	21.3806		15.4179
GO:0006515	7	protein quality control for misfolded or incompletely synthesized proteins	18	22	2	2	2	0.99318	0.058486	0.058486	9.09	680945;171129	Sdf2l1;Uggt1	1373043_at;1368953_at		36.0129	36.0129	25.5557	14.7887	31.9338	13.6172	19.3442	19.3442	17.7745	2.21989	18.7319	2.04404	47.0058	47.0058	44.7408	3.20326	46.1223	2.94951	0.5	36.0129			46.4701;25.5557	20.9139;17.7745	49.2709;44.7408	2	0	2	680945;171129	1373043_at;1368953_at	36.0129	36.0129	14.7887	19.3442
GO:0006516	6	glycoprotein catabolic process	11	11	1	1	1	0.98417	0.18058	0.18058	9.09	310864	Manba	1371875_at		20.1872	20.1872	20.1872		20.1872		14.5745	14.5745	14.5745		14.5745		32.2173	32.2173	32.2173		32.2173		0	20.1872			20.1872	14.5745	32.2173	1	0	1	310864	1371875_at	20.1872	20.1872		14.5745
GO:0006518	5	peptide metabolic process	230	304	9	9	9	0.95238	0.097171	0.12268	2.96	116548;25627;24423;364070;300850;499422;25700;116686;29487	Pcsk5;Cma1;Gstm1;Iars2;Gsta4;Gstt3;Ide;Gsr;Gstt2	1392773_at;1387173_at;1386985_at;1380561_at;1372297_at;1371942_at;1387652_at;1369061_at;1368409_at	116548(-0.2018)	19.3311	21.2785	0.0171458	8.25098	20.9022	4.89927	13.8095	15.4369	2.85172e-09	5.6944	14.9855	3.12094	31.9673	33.8509	0.117549	15.0366	34.2514	10.3594					24.5208;0.01714575;20.1987;16.8616;22.4578;21.2785;15.7599;28.7171;24.1682	17.1812;2.85172E-9;14.5817;12.6203;15.9654;15.4369;11.7975;19.5196;17.1827	42.1138;0.1175485;32.2415;24.9819;37.195;33.8509;23.2687;53.5243;40.4119	8	1	8	116548;24423;364070;300850;499422;25700;116686;29487	1392773_at;1386985_at;1380561_at;1372297_at;1371942_at;1387652_at;1369061_at;1368409_at	21.7453	21.8681	4.22531	15.5357
GO:0006520	6	cellular amino acid metabolic process	241	248	6	6	6	0.84138	0.2864	0.46058	2.42	688283;299857;58819;364070;363285;24311	Afmid;Shmt2;Txnrd1;Iars2;Scly;Ddc	1396300_at,1396301_x_at;1388695_at;1386958_at;1380561_at;1374524_at;1368064_a_at		18.2919	19.2629	7.86658	8.81205	18.5623	8.48036	11.363	14.144	0.0550111	8.2538	12.1374	7.40553	34.9288	33.2684	20.2174	14.3765	33.925	15.1324					31.613799999999998;7.86658;21.6641;16.8616;22.0766;9.66871	21.33885;2.76025;15.6676;12.6203;15.7357;0.0550111	61.50750000000001;20.2174;34.7079;24.9819;36.3291;31.8289	7	0	6	688283;299857;58819;364070;363285;24311	1396300_at,1396301_x_at;1388695_at;1386958_at;1380561_at;1374524_at;1368064_a_at	18.2919	19.2629	8.81205	11.363
GO:0006544	8	glycine metabolic process	14	14	1	1	1	0.97471	0.22393	0.22393	7.14	299857	Shmt2	1388695_at		7.86658	7.86658	7.86658		7.86658		2.76025	2.76025	2.76025		2.76025		20.2174	20.2174	20.2174		20.2174		0	7.86658			7.86658	2.76025	20.2174	1	0	1	299857	1388695_at	7.86658	7.86658		2.76025
GO:0006545	8	glycine biosynthetic process	5	5	1	1	1	0.99691	0.086532	0.086532	20	299857	Shmt2	1388695_at		7.86658	7.86658	7.86658		7.86658		2.76025	2.76025	2.76025		2.76025		20.2174	20.2174	20.2174		20.2174		0	7.86658	0	7.86658	7.86658	2.76025	20.2174	1	0	1	299857	1388695_at	7.86658	7.86658		2.76025
GO:0006563	9	L-serine metabolic process	8	8	1	1	1	0.99165	0.13483	0.13483	12.5	299857	Shmt2	1388695_at		7.86658	7.86658	7.86658		7.86658		2.76025	2.76025	2.76025		2.76025		20.2174	20.2174	20.2174		20.2174		0	7.86658	0	7.86658	7.86658	2.76025	20.2174	1	0	1	299857	1388695_at	7.86658	7.86658		2.76025
GO:0006564	9	L-serine biosynthetic process	4	4	1	1	1	0.99812	0.069844	0.069844	25	299857	Shmt2	1388695_at		7.86658	7.86658	7.86658		7.86658		2.76025	2.76025	2.76025		2.76025		20.2174	20.2174	20.2174		20.2174		0	7.86658	0	7.86658	7.86658	2.76025	20.2174	1	0	1	299857	1388695_at	7.86658	7.86658		2.76025
GO:0006568	7	tryptophan metabolic process	9	9	1	1	1	0.98939	0.15036	0.15036	11.11	688283	Afmid	1396300_at,1396301_x_at		31.6138	31.6138	31.6138		31.6138		21.3389	21.3389	21.3389		21.3389		61.5075	61.5075	61.5075		61.5075		0	31.6138	0	31.6138	31.6138	21.3389	61.5075	2	0	1	688283	1396300_at,1396301_x_at	31.6138	31.6138		21.3389
GO:0006569	7	tryptophan catabolic process	6	6	1	1	1	0.99542	0.10292	0.10292	16.67	688283	Afmid	1396300_at,1396301_x_at		31.6138	31.6138	31.6138		31.6138		21.3389	21.3389	21.3389		21.3389		61.5075	61.5075	61.5075		61.5075		0	31.6138	0	31.6138	31.6138	21.3389	61.5075	2	0	1	688283	1396300_at,1396301_x_at	31.6138	31.6138		21.3389
GO:0006575	4	cellular modified amino acid metabolic process	149	154	8	8	8	0.99817	0.0065861	0.0065861	5.19	299857;64305;24423;300850;499422;116686;29487;29441	Shmt2;Sult1b1;Gstm1;Gsta4;Gstt3;Gsr;Gstt2;Por	1388695_at;1387314_at;1386985_at;1372297_at;1371942_at;1369061_at;1368409_at;1368213_at,1387109_at		21.8652	21.8681	7.86658	8.08746	22.6664	8.90935	14.6317	15.7012	2.76025	6.19162	14.983	6.5181	40.2753	35.523	20.2174	16.6739	43.1242	19.8135	6.5	31.7263			7.86658;34.7354;20.1987;22.4578;21.2785;28.7171;24.1682;15.499569999999999	2.76025;22.5803;14.5817;15.9654;15.4369;19.5196;17.1827;9.02697	20.2174;74.2881;32.2415;37.195;33.8509;53.5243;40.4119;30.4732	9	0	8	299857;64305;24423;300850;499422;116686;29487;29441	1388695_at;1387314_at;1386985_at;1372297_at;1371942_at;1369061_at;1368409_at;1368213_at,1387109_at	21.8652	21.8681	8.08746	14.6317
GO:0006576	6	cellular biogenic amine metabolic process	34	35	2	2	2	0.97556	0.12979	0.12979	5.71	688283;360547	Afmid;Sat2	1396300_at,1396301_x_at;1374892_at		15.8821	15.8821	0.150424	22.248	21.7697	20.6311	10.696	10.696	0.053226	15.0512	14.6791	13.9574	33.8978	33.8978	6.28806	39.046	44.2308	36.2084	0.5	15.8821			31.613799999999998;0.150424	21.33885;0.053226	61.50750000000001;6.28806	2	1	1	688283	1396300_at,1396301_x_at	31.6138	31.6138		21.3389
GO:0006577	5	amino-acid betaine metabolic process	17	18	1	1	1	0.95942	0.27819	0.27819	5.56	29441	Por	1368213_at,1387109_at		15.4996	15.4996	15.4996		15.4996		9.02697	9.02697	9.02697		9.02697		30.4732	30.4732	30.4732		30.4732		0	15.4996			15.4996	9.02697	30.4732	2	0	1	29441	1368213_at,1387109_at	15.4996	15.4996		9.02697
GO:0006584	6	catecholamine metabolic process	38	39	1	1	1	0.8455	0.50684	0.50684	2.56	24311	Ddc	1368064_a_at		9.66871	9.66871	9.66871		9.66871		0.0550111	0.0550111	0.0550111		0.0550111		31.8289	31.8289	31.8289		31.8289						9.66871	0.0550111	31.8289	1	0	1	24311	1368064_a_at	9.66871	9.66871		0.0550111
GO:0006586	6	indolalkylamine metabolic process	9	9	1	1	1	0.98939	0.15036	0.15036	11.11	688283	Afmid	1396300_at,1396301_x_at		31.6138	31.6138	31.6138		31.6138		21.3389	21.3389	21.3389		21.3389		61.5075	61.5075	61.5075		61.5075		0	31.6138	0	31.6138	31.6138	21.3389	61.5075	2	0	1	688283	1396300_at,1396301_x_at	31.6138	31.6138		21.3389
GO:0006595	7	polyamine metabolic process	12	13	1	1	1	0.97807	0.20974	0.20974	7.69	360547	Sat2	1374892_at		0.150424	0.150424	0.150424		0.150424		0.053226	0.053226	0.053226		0.053226		6.28806	6.28806	6.28806		6.28806		0	0.150424			0.150424	0.053226	6.28806	0	1	0
GO:0006605	6	protein targeting	129	136	3	3	3	0.77222	0.44214	0.73772	2.21	689931;360733;117106	Mgarp;Rtp4;Scarb2	1393627_at;1379285_at;1368379_at		10.7235	14.6526	0.292383	9.12478	10.3221	9.39188	7.99447	11.1178	0.0515247	6.93089	7.67959	7.12723	8.33335e+06	25.8244	21.0678	1.44337e+07	9.11935e+06	1.47388e+07					14.6526;0.292383;17.2256	11.1178;0.0515247;12.8141	21.0678;2.5E7;25.8244	3	0	3	689931;360733;117106	1393627_at;1379285_at;1368379_at	10.7235	14.6526	9.12478	7.99447
GO:0006606	6	protein import into nucleus	62	67	1	1	1	0.66118	0.70353	1	1.49	117514	Txnip	1371131_a_at		28.4676	28.4676	28.4676		28.4676		19.3855	19.3855	19.3855		19.3855		52.7858	52.7858	52.7858		52.7858						28.4676	19.3855	52.7858	0	1	0
GO:0006611	6	protein export from nucleus	38	41	1	1	1	0.83284	0.52442	0.52442	2.44	291671	Hspa9	1389930_at		0.0171458	0.0171458	0.0171458		0.0171458		2.85172e-09	2.85172e-09	2.85172e-09		2.85172e-09		0.117549	0.117549	0.117549		0.117549						0.0171458	2.85172e-09	0.117549	1	0	1	291671	1389930_at	0.0171458	0.0171458		2.85172e-09
GO:0006612	7	protein targeting to membrane	48	49	1	1	1	0.78072	0.58874	0.58874	2.04	360733	Rtp4	1379285_at		0.292383	0.292383	0.292383		0.292383		0.0515247	0.0515247	0.0515247		0.0515247		25000000	25000000	25000000		25000000						0.292383	0.0515247	25000000	1	0	1	360733	1379285_at	0.292383	0.292383		0.0515247
GO:0006622	8	protein targeting to lysosome	14	17	1	1	1	0.96351	0.26499	0.26499	5.88	117106	Scarb2	1368379_at		17.2256	17.2256	17.2256		17.2256		12.8141	12.8141	12.8141		12.8141		25.8244	25.8244	25.8244		25.8244		0	17.2256			17.2256	12.8141	25.8244	1	0	1	117106	1368379_at	17.2256	17.2256		12.8141
GO:0006623	7	protein targeting to vacuole	22	25	1	1	1	0.92663	0.36422	0.36422	4	117106	Scarb2	1368379_at		17.2256	17.2256	17.2256		17.2256		12.8141	12.8141	12.8141		12.8141		25.8244	25.8244	25.8244		25.8244						17.2256	12.8141	25.8244	1	0	1	117106	1368379_at	17.2256	17.2256		12.8141
GO:0006626	7	protein targeting to mitochondrion	17	18	1	1	1	0.95942	0.27819	0.27819	5.56	689931	Mgarp	1393627_at		14.6526	14.6526	14.6526		14.6526		11.1178	11.1178	11.1178		11.1178		21.0678	21.0678	21.0678		21.0678		0	14.6526			14.6526	11.1178	21.0678	1	0	1	689931	1393627_at	14.6526	14.6526		11.1178
GO:0006629	4	lipid metabolic process	823	863	29	28	28	0.99921	0.001649	0.0020502	3.24	64473;288985;171402;171400;64305;24297;24539;305419;286896;501907;679692;291132;362676;299194;361659;363285;294400;293989;191574;171352;246074;24296;24913;25357;24536;25426;25080;29441	Bpnt1;Insig2;Elovl6;Elovl5;Sult1b1;Cyp1a2;Lpl;Pi4k2b;Sgpl1;RGD1559459;Lpgat1;Gpld1;Fam213b;Ptgr2;Plekha1;Scly;Nus1;Cyp2c6v1;Akr1c14;Cyp3a9;Scd1;Cyp1a1;Pla2g16;Thrsp;Lepr;Cyp1b1;Apoa4;Por	1398317_at;1389377_at,1393690_at;1388108_at;1387630_at;1387314_at;1387243_at;1386965_at;1384950_at;1382843_at;1381852_at;1397880_at;1380833_at;1379367_at;1384345_at;1376762_at;1374524_at;1392522_at;1370580_a_at;1370563_at,1370708_a_at,1396933_s_at;1370387_at;1370355_at;1370269_at;1370202_at;1371400_at;1370604_at,1370605_s_at,1371223_a_at,1388232_a_at;1368990_at;1368520_at;1368213_at,1387109_at	294400(0.1633);24536(-0.2274)	20.8356	21.0892	0.140946	13.2411	19.6634	13.4219	13.1818	15.1285	0.0493054	9.30587	12.4409	9.45514	543196	40.6501	13.316	1.94436e+06	422692	1.64748e+06					13.3274;18.81295;9.61605;35.3004;34.7354;6.06621;36.9287;39.7988;22.451;6.38914;20.1019;9.29434;48.0248;36.2687;23.1615;22.0766;24.3346;0.147057;20.05819333333333;25.9004;28.83;0.140946;6.36787;37.6874;14.379010000000001;27.2489;0.44934;15.499569999999999	10.0313;13.64725;2.85924;22.8512;22.5803;0.185991;23.617;24.9151;15.9613;2.35873;14.5212;4.33067;29.3052;24.0101;16.1835;15.7357;17.0734;0.0493054;12.044102500000001;17.9697;20.5359;0.0512492;0.0860943;24.9041;5.44549525;18.7215;0.0892025;9.02697	19.3769;29.77735;27.9604;76.5826;74.2881;16.8801;83.6043;97.6928;37.1795;15.8599;32.0384;24.0279;50.2806;77.0796;39.6472;36.3291;41.6531;13.512;8333364.1421;45.6414;49.6939;13.316;29.194;81.9872;6375024.07585;49.2941;500000.0;30.4732	28	7	24	64473;288985;171402;171400;64305;24297;24539;305419;286896;501907;679692;362676;299194;363285;294400;293989;191574;171352;246074;24296;25357;25426;25080;29441	1398317_at;1389377_at,1393690_at;1388108_at;1387630_at;1387314_at;1387243_at;1386965_at;1384950_at;1382843_at;1381852_at;1397880_at;1379367_at;1384345_at;1374524_at;1392522_at;1370580_a_at;1370563_at,1370708_a_at,1396933_s_at;1370387_at;1370355_at;1370269_at;1371400_at;1368990_at;1368520_at;1368213_at,1387109_at	22.0914	22.2638	13.6833	14.2935
GO:0006631	6	fatty acid metabolic process	243	258	10	10	10	0.99309	0.018091	0.027026	3.88	171402;171400;24539;286896;362676;299194;191574;246074;25426;29441	Elovl6;Elovl5;Lpl;Sgpl1;Fam213b;Ptgr2;Akr1c14;Scd1;Cyp1b1;Por	1388108_at;1387630_at;1386965_at;1382843_at;1379367_at;1384345_at;1370563_at,1370708_a_at,1396933_s_at;1370355_at;1368990_at;1368213_at,1387109_at		28.0226	28.0394	9.61605	11.5071	28.8097	10.2445	17.8933	19.6287	2.85924	7.99471	18.7697	7.05059	833385	49.9873	27.9604	2.63522e+06	393352	1.86273e+06					9.61605;35.3004;36.9287;22.451;48.0248;36.2687;20.05819333333333;28.83;27.2489;15.499569999999999	2.85924;22.8512;23.617;15.9613;29.3052;24.0101;12.044102500000001;20.5359;18.7215;9.02697	27.9604;76.5826;83.6043;37.1795;50.2806;77.0796;8333364.1421;49.6939;49.2941;30.4732	13	0	10	171402;171400;24539;286896;362676;299194;191574;246074;25426;29441	1388108_at;1387630_at;1386965_at;1382843_at;1379367_at;1384345_at;1370563_at,1370708_a_at,1396933_s_at;1370355_at;1368990_at;1368213_at,1387109_at	28.0226	28.0394	11.5071	17.8933
GO:0006633	6	fatty acid biosynthetic process	78	80	5	5	5	0.9969	0.014383	0.014383	6.25	171402;171400;24539;362676;246074	Elovl6;Elovl5;Lpl;Fam213b;Scd1	1388108_at;1387630_at;1386965_at;1379367_at;1370355_at		31.74	35.3004	9.61605	14.1663	32.4304	11.0153	19.8337	22.8512	2.85924	10.0219	21.1029	7.41394	57.6244	50.2806	27.9604	22.5341	58.1426	18.9912	3	36.9287			9.61605;35.3004;36.9287;48.0248;28.83	2.85924;22.8512;23.617;29.3052;20.5359	27.9604;76.5826;83.6043;50.2806;49.6939	5	0	5	171402;171400;24539;362676;246074	1388108_at;1387630_at;1386965_at;1379367_at;1370355_at	31.74	35.3004	14.1663	19.8337
GO:0006636	7	unsaturated fatty acid biosynthetic process	27	27	3	3	3	0.99872	0.012126	0.012126	11.11	171400;362676;246074	Elovl5;Fam213b;Scd1	1387630_at;1379367_at;1370355_at		37.3851	35.3004	28.83	9.76573	34.4751	8.9762	24.2308	22.8512	20.5359	4.54451	22.9377	4.09142	58.8524	50.2806	49.6939	15.3576	57.2496	14.6445	0.5	32.0652	1.5	41.6626	35.3004;48.0248;28.83	22.8512;29.3052;20.5359	76.5826;50.2806;49.6939	3	0	3	171400;362676;246074	1387630_at;1379367_at;1370355_at	37.3851	35.3004	9.76573	24.2308
GO:0006638	5	neutral lipid metabolic process	68	73	5	5	5	0.99805	0.009933	0.009933	6.85	288985;24539;246074;24913;25080	Insig2;Lpl;Scd1;Pla2g16;Apoa4	1389377_at,1393690_at;1386965_at;1370355_at;1370202_at;1368520_at		18.2778	18.813	0.44934	15.1591	18.3959	14.8213	11.5951	13.6472	0.0860943	11.1076	12.0161	11.0375	100038	49.6939	29.194	223585	110882	232185	2.5	23.8215			18.81295;36.9287;28.83;6.36787;0.44934	13.64725;23.617;20.5359;0.0860943;0.0892025	29.77735;83.6043;49.6939;29.194;500000.0	5	1	4	288985;24539;246074;25080	1389377_at,1393690_at;1386965_at;1370355_at;1368520_at	21.2552	23.8215	15.7256	14.4723
GO:0006639	6	acylglycerol metabolic process	67	72	5	5	5	0.99818	0.0093862	0.0093862	6.94	288985;24539;246074;24913;25080	Insig2;Lpl;Scd1;Pla2g16;Apoa4	1389377_at,1393690_at;1386965_at;1370355_at;1370202_at;1368520_at		18.2778	18.813	0.44934	15.1591	18.3959	14.8213	11.5951	13.6472	0.0860943	11.1076	12.0161	11.0375	100038	49.6939	29.194	223585	110882	232185	2.5	23.8215			18.81295;36.9287;28.83;6.36787;0.44934	13.64725;23.617;20.5359;0.0860943;0.0892025	29.77735;83.6043;49.6939;29.194;500000.0	5	1	4	288985;24539;246074;25080	1389377_at,1393690_at;1386965_at;1370355_at;1368520_at	21.2552	23.8215	15.7256	14.4723
GO:0006641	7	triglyceride metabolic process	53	58	5	5	5	0.99942	0.0037594	0.0037594	8.62	288985;24539;246074;24913;25080	Insig2;Lpl;Scd1;Pla2g16;Apoa4	1389377_at,1393690_at;1386965_at;1370355_at;1370202_at;1368520_at		18.2778	18.813	0.44934	15.1591	18.3959	14.8213	11.5951	13.6472	0.0860943	11.1076	12.0161	11.0375	100038	49.6939	29.194	223585	110882	232185	1.5	12.5904			18.81295;36.9287;28.83;6.36787;0.44934	13.64725;23.617;20.5359;0.0860943;0.0892025	29.77735;83.6043;49.6939;29.194;500000.0	5	1	4	288985;24539;246074;25080	1389377_at,1393690_at;1386965_at;1370355_at;1368520_at	21.2552	23.8215	15.7256	14.4723
GO:0006643	5	membrane lipid metabolic process	126	132	5	5	5	0.9684	0.088971	0.088971	3.79	171402;171400;286896;291132;25426	Elovl6;Elovl5;Sgpl1;Gpld1;Cyp1b1	1388108_at;1387630_at;1382843_at;1380833_at;1368990_at		20.7821	22.451	9.29434	11.3141	20.9541	12.1538	12.9448	15.9613	2.85924	8.89562	13.0028	9.24947	43.0089	37.1795	24.0279	21.1389	44.2341	22.5025					9.61605;35.3004;22.451;9.29434;27.2489	2.85924;22.8512;15.9613;4.33067;18.7215	27.9604;76.5826;37.1795;24.0279;49.2941	4	1	4	171402;171400;286896;25426	1388108_at;1387630_at;1382843_at;1368990_at	23.6541	24.8499	10.756	15.0983
GO:0006644	5	phospholipid metabolic process	244	252	7	6	6	0.83219	0.29884	0.46489	2.38	64473;305419;679692;291132;24913;25080	Bpnt1;Pi4k2b;Lpgat1;Gpld1;Pla2g16;Apoa4	1398317_at;1384950_at;1397880_at;1380833_at;1370202_at;1368520_at		14.8899	11.3109	0.44934	13.8746	12.5944	12.8165	8.99559	7.18098	0.0860943	9.64884	7.21639	9.00779	83367.1	30.6162	19.3769	204108	106622	224307					13.3274;39.7988;20.1019;9.29434;6.36787;0.44934	10.0313;24.9151;14.5212;4.33067;0.0860943;0.0892025	19.3769;97.6928;32.0384;24.0279;29.194;500000.0	4	2	4	64473;305419;679692;25080	1398317_at;1384950_at;1397880_at;1368520_at	18.4194	16.7146	16.4191	12.3892
GO:0006650	6	glycerophospholipid metabolic process	176	183	4	4	4	0.76799	0.41673	0.57294	2.19	64473;305419;291132;25080	Bpnt1;Pi4k2b;Gpld1;Apoa4	1398317_at;1384950_at;1380833_at;1368520_at		15.7175	11.3109	0.44934	16.9312	12.0908	15.5697	9.84157	7.18098	0.0892025	10.8432	6.98493	10.0279	125035	60.8603	19.3769	249976	160809	269643					13.3274;39.7988;9.29434;0.44934	10.0313;24.9151;4.33067;0.0892025	19.3769;97.6928;24.0279;500000.0	3	1	3	64473;305419;25080	1398317_at;1384950_at;1368520_at	17.8585	13.3274	20.0622	11.6785
GO:0006662	5	glycerol ether metabolic process	12	12	1	1	1	0.98122	0.19529	0.19529	8.33	24913	Pla2g16	1370202_at		6.36787	6.36787	6.36787		6.36787		0.0860943	0.0860943	0.0860943		0.0860943		29.194	29.194	29.194		29.194		0	6.36787			6.36787	0.0860943	29.194	0	1	0
GO:0006664	6	glycolipid metabolic process	62	67	1	1	1	0.66118	0.70353	1	1.49	291132	Gpld1	1380833_at		9.29434	9.29434	9.29434		9.29434		4.33067	4.33067	4.33067		4.33067		24.0279	24.0279	24.0279		24.0279						9.29434	4.33067	24.0279	0	1	0
GO:0006665	5	sphingolipid metabolic process	94	96	3	3	3	0.90603	0.24757	0.24757	3.12	171402;171400;286896	Elovl6;Elovl5;Sgpl1	1388108_at;1387630_at;1382843_at		22.4558	22.451	9.61605	12.8422	27.2287	14.542	13.8906	15.9613	2.85924	10.1556	16.5908	11.3126	47.2408	37.1795	27.9604	25.8254	61.1939	27.6263					9.61605;35.3004;22.451	2.85924;22.8512;15.9613	27.9604;76.5826;37.1795	3	0	3	171402;171400;286896	1388108_at;1387630_at;1382843_at	22.4558	22.451	12.8422	13.8906
GO:0006672	6	ceramide metabolic process	61	62	1	1	1	0.69418	0.6753	1	1.61	286896	Sgpl1	1382843_at		22.451	22.451	22.451		22.451		15.9613	15.9613	15.9613		15.9613		37.1795	37.1795	37.1795		37.1795						22.451	15.9613	37.1795	1	0	1	286896	1382843_at	22.451	22.451		15.9613
GO:0006690	6	icosanoid metabolic process	66	71	4	4	4	0.99114	0.038527	0.038527	5.63	362676;299194;191574;25426	Fam213b;Ptgr2;Akr1c14;Cyp1b1	1379367_at;1384345_at;1370563_at,1370708_a_at,1396933_s_at;1368990_at		32.9001	31.7588	20.0582	12.0686	32.4029	11.2802	21.0202	21.3658	12.0441	7.38095	21.0312	6.43292	2.08339e+06	63.6801	49.2941	4.16665e+06	1.07097e+06	3.22024e+06	2.5	42.1467			48.0248;36.2687;20.05819333333333;27.2489	29.3052;24.0101;12.044102500000001;18.7215	50.2806;77.0796;8333364.1421;49.2941	6	0	4	362676;299194;191574;25426	1379367_at;1384345_at;1370563_at,1370708_a_at,1396933_s_at;1368990_at	32.9001	31.7588	12.0686	21.0202
GO:0006692	6	prostanoid metabolic process	27	29	3	3	3	0.99832	0.014757	0.014757	10.34	362676;299194;191574	Fam213b;Ptgr2;Akr1c14	1379367_at;1384345_at;1370563_at,1370708_a_at,1396933_s_at		34.7839	36.2687	20.0582	14.0423	38.0005	14.4341	21.7865	24.0101	12.0441	8.84278	23.5396	8.88754	2.77783e+06	77.0796	50.2806	4.81123e+06	2.23408e+06	4.52094e+06	0.5	28.1634	1.5	42.1467	48.0248;36.2687;20.05819333333333	29.3052;24.0101;12.044102500000001	50.2806;77.0796;8333364.1421	5	0	3	362676;299194;191574	1379367_at;1384345_at;1370563_at,1370708_a_at,1396933_s_at	34.7839	36.2687	14.0423	21.7865
GO:0006693	7	prostaglandin metabolic process	27	29	3	3	3	0.99832	0.014757	0.014757	10.34	362676;299194;191574	Fam213b;Ptgr2;Akr1c14	1379367_at;1384345_at;1370563_at,1370708_a_at,1396933_s_at		34.7839	36.2687	20.0582	14.0423	38.0005	14.4341	21.7865	24.0101	12.0441	8.84278	23.5396	8.88754	2.77783e+06	77.0796	50.2806	4.81123e+06	2.23408e+06	4.52094e+06	0.5	28.1634	1.5	42.1467	48.0248;36.2687;20.05819333333333	29.3052;24.0101;12.044102500000001	50.2806;77.0796;8333364.1421	5	0	3	362676;299194;191574	1379367_at;1384345_at;1370563_at,1370708_a_at,1396933_s_at	34.7839	36.2687	14.0423	21.7865
GO:0006694	6	steroid biosynthetic process	82	89	2	2	2	0.78566	0.47628	0.67488	2.25	288985;25080	Insig2;Apoa4	1389377_at,1393690_at;1368520_at		9.63115	9.63115	0.44934	12.985	7.56146	12.6508	6.86823	6.86823	0.0892025	9.58699	5.34015	9.34025	250015	250015	29.7773	353532	306365	344434					18.81295;0.44934	13.64725;0.0892025	29.77735;500000.0	3	0	2	288985;25080	1389377_at,1393690_at;1368520_at	9.63115	9.63115	12.985	6.86823
GO:0006695	7	cholesterol biosynthetic process	29	29	2	2	2	0.98524	0.094832	0.094832	6.9	288985;25080	Insig2;Apoa4	1389377_at,1393690_at;1368520_at		9.63115	9.63115	0.44934	12.985	7.56146	12.6508	6.86823	6.86823	0.0892025	9.58699	5.34015	9.34025	250015	250015	29.7773	353532	306365	344434	0.5	9.63115			18.81295;0.44934	13.64725;0.0892025	29.77735;500000.0	3	0	2	288985;25080	1389377_at,1393690_at;1368520_at	9.63115	9.63115	12.985	6.86823
GO:0006706	6	steroid catabolic process	20	22	1	1	1	0.94151	0.32867	0.32867	4.55	24297	Cyp1a2	1387243_at		6.06621	6.06621	6.06621		6.06621		0.185991	0.185991	0.185991		0.185991		16.8801	16.8801	16.8801		16.8801						6.06621	0.185991	16.8801	1	0	1	24297	1387243_at	6.06621	6.06621		0.185991
GO:0006720	5	isoprenoid metabolic process	78	81	5	5	5	0.9967	0.015112	0.015112	6.17	24297;294400;293989;24296;25426	Cyp1a2;Nus1;Cyp2c6v1;Cyp1a1;Cyp1b1	1387243_at;1392522_at;1370580_a_at;1370269_at;1368990_at	294400(0.1633)	11.5875	6.06621	0.140946	13.2303	12.0899	14.1265	7.21629	0.185991	0.0493054	9.76807	7.96545	10.0611	26.9311	16.8801	13.316	17.1996	28.2996	18.4317	3.5	25.7918			6.06621;24.3346;0.147057;0.140946;27.2489	0.185991;17.0734;0.0493054;0.0512492;18.7215	16.8801;41.6531;13.512;13.316;49.2941	5	0	5	24297;294400;293989;24296;25426	1387243_at;1392522_at;1370580_a_at;1370269_at;1368990_at	11.5875	6.06621	13.2303	7.21629
GO:0006721	6	terpenoid metabolic process	61	64	4	4	4	0.99426	0.027723	0.027723	6.25	24297;293989;24296;25426	Cyp1a2;Cyp2c6v1;Cyp1a1;Cyp1b1	1387243_at;1370580_a_at;1370269_at;1368990_at		8.40078	3.10663	0.140946	12.8718	10.0982	14.4803	4.75201	0.11862	0.0493054	9.31321	6.48399	10.2283	23.2506	15.196	13.316	17.4393	26.1275	19.3998	2.5	16.6576			6.06621;0.147057;0.140946;27.2489	0.185991;0.0493054;0.0512492;18.7215	16.8801;13.512;13.316;49.2941	4	0	4	24297;293989;24296;25426	1387243_at;1370580_a_at;1370269_at;1368990_at	8.40078	3.10663	12.8718	4.75201
GO:0006725	4	cellular aromatic compound metabolic process	2527	2699	44	44	44	0.26447	0.7872	0.51372	1.63	688283;305844;295160;266730;307395;297768;298490;299857;25315;64305;24297;24423;58819;297783;363017;298884;311078;311021;364070;360481;309957;309544;363465;314312;192281;58919;117514;286954;191574;24296;25357;24894;29516;25690;24299;25426;171129;56759;24651;81813;24311;65155;83472;83619	Afmid;Rnase1l2;Mnd1;Slc17a3;Ablim3;Lactb2;Ppcs;Shmt2;Ephx1;Sult1b1;Cyp1a2;Gstm1;Txnrd1;Mybl1;Taf1d;Gen1;Psmd14;Nmi;Iars2;Dnaja3;Mef2a;Rbm20;Pir;Entpd5;Oas1a;Ccnd1;Txnip;Ugt2b1;Akr1c14;Cyp1a1;Thrsp;Cyp2a1;Pde3b;Ahr;Cyp2a3;Cyp1b1;Uggt1;Rnase4;Pklr;Klf10;Ddc;Alas1;Ugdh;Nfe2l2	1396300_at,1396301_x_at;1393026_at;1391626_at;1390591_at;1390255_at;1389551_at;1388756_at;1388695_at;1387669_a_at;1387314_at;1387243_at;1386985_at;1386958_at;1385132_at;1385109_at;1384102_at;1386073_at;1381875_at;1380561_at;1378392_at;1378360_at;1391810_at;1377662_at;1372774_at,1382434_at,1382544_at;1371152_a_at;1371150_at,1371643_at,1383075_at;1371131_a_at;1370698_at;1370563_at,1370708_a_at,1396…	363017(-0.3027)	18.9671	20.1284	0.0904144	13.1263	17.1997	12.8863	12.1922	13.4048	0.0308581	9.30648	11.2727	8.98338	1.33716e+06	40.027	0.594918	5.37224e+06	2.41671e+06	7.36436e+06					31.613799999999998;0.130311;6.70004;37.2018;0.269704;17.3415;18.8759;7.86658;8.09437;34.7354;6.06621;20.1987;21.6641;30.3994;48.7874;33.6809;39.2949;0.230619;16.8616;31.2133;33.9069;26.7666;17.8188;21.006220000000003;28.5593;15.557466666666665;28.4676;0.0904144;20.05819333333333;0.140946;37.6874;0.732749;27.3061;0.487373;4.71298;27.2489;25.5557;7.72749;23.027;31.0897;9.66871;6.83525;20.3319;8.540…	21.33885;0.0308581;2.2455;24.0738;0.064511;12.752;13.7458;2.76025;2.7845;22.5803;0.185991;14.5817;15.6676;20.4086;31.8194;21.1562;25.1873;0.0445238;12.6203;20.8292;21.8155;18.4547;13.0639;12.870903333333333;19.4349;11.556399999999998;19.3855;0.0374753;12.044102500000001;0.0512492;24.9041;0.0943336;19.0667;0.0641274;0.11957;18.7215;17.7745;4.85547;16.181649999999998;20.7657;0.0550111;3.02426;14.79…	61.50750000000001;500000.0;16.9955;83.0684;14.6268;26.5328;29.5271;20.2174;20.9633;74.2881;16.8801;32.2415;34.7079;58.7317;58.59;75.2628;92.2647;2.5E7;24.9819;61.4029;72.9728;47.9633;27.4474;41.02843333333333;53.0563;23.282066666666665;52.7858;0.594918;8333364.1421;13.316;81.9872;18.0087;48.0975;2.5E7;14.7999;49.2941;44.7408;17.1691;39.02565;60.9906;31.8289;16.0192;32.0222;23.1149	40	12	35	688283;305844;295160;266730;297768;298490;299857;25315;64305;24297;24423;58819;297783;311078;311021;364070;360481;309544;363465;314312;192281;286954;191574;24296;25357;24894;29516;25690;24299;25426;171129;24311;65155;83472;83619	1396300_at,1396301_x_at;1393026_at;1391626_at;1390591_at;1389551_at;1388756_at;1388695_at;1387669_a_at;1387314_at;1387243_at;1386985_at;1386958_at;1385132_at;1386073_at;1381875_at;1380561_at;1378392_at;1391810_at;1377662_at;1372774_at,1382434_at,1382544_at;1371152_a_at;1370698_at;1370563_at,1370708_a_at,1396933_s_at;1370269_at;1371400_at;1387511_at;1369157_at;1369146_a_at;1369136_at;1368990_at;13…	17.4867	18.8759	12.4405	11.1102
GO:0006730	4	one-carbon metabolic process	23	24	1	1	1	0.93172	0.35258	0.35258	4.17	299857	Shmt2	1388695_at		7.86658	7.86658	7.86658		7.86658		2.76025	2.76025	2.76025		2.76025		20.2174	20.2174	20.2174		20.2174						7.86658	2.76025	20.2174	1	0	1	299857	1388695_at	7.86658	7.86658		2.76025
GO:0006732	5	coenzyme metabolic process	235	248	5	5	5	0.7136	0.4596	0.80604	2.02	688283;298490;299857;58819;24651	Afmid;Ppcs;Shmt2;Txnrd1;Pklr	1396300_at,1396301_x_at;1388756_at;1388695_at;1386958_at;1368651_at,1387263_at		20.6095	21.6641	7.86658	8.56502	20.658	10.0615	13.9388	15.6676	2.76025	6.85159	13.576	8.01268	36.9971	34.7079	20.2174	15.3905	38.7747	17.7242					31.613799999999998;18.8759;7.86658;21.6641;23.027	21.33885;13.7458;2.76025;15.6676;16.181649999999998	61.50750000000001;29.5271;20.2174;34.7079;39.02565	5	2	4	688283;298490;299857;58819	1396300_at,1396301_x_at;1388756_at;1388695_at;1386958_at	20.0051	20.27	9.76615	13.3781
GO:0006733	6	oxidoreduction coenzyme metabolic process	98	101	3	3	3	0.89196	0.27177	0.43135	2.97	688283;58819;24651	Afmid;Txnrd1;Pklr	1396300_at,1396301_x_at;1386958_at;1368651_at,1387263_at		25.435	23.027	21.6641	5.39424	27.0197	5.31513	17.7294	16.1816	15.6676	3.13645	18.5907	3.17631	45.0804	39.0256	34.7079	14.3892	49.4521	13.958					31.613799999999998;21.6641;23.027	21.33885;15.6676;16.181649999999998	61.50750000000001;34.7079;39.02565	3	2	2	688283;58819	1396300_at,1396301_x_at;1386958_at	26.639	26.639	7.0355	18.5032
GO:0006739	8	NADP metabolic process	25	25	1	1	1	0.92663	0.36422	0.36422	4	58819	Txnrd1	1386958_at		21.6641	21.6641	21.6641		21.6641		15.6676	15.6676	15.6676		15.6676		34.7079	34.7079	34.7079		34.7079						21.6641	15.6676	34.7079	1	0	1	58819	1386958_at	21.6641	21.6641		15.6676
GO:0006749	5	glutathione metabolic process	44	46	5	5	5	0.99984	0.0013378	0.0013378	10.87	24423;300850;499422;116686;29487	Gstm1;Gsta4;Gstt3;Gsr;Gstt2	1386985_at;1372297_at;1371942_at;1369061_at;1368409_at		23.3641	22.4578	20.1987	3.33512	22.821	3.39572	16.5373	15.9654	14.5817	1.91527	16.2043	1.95437	39.4447	37.195	32.2415	8.47656	38.2178	8.58766	1.5	21.8681	3.5	26.4427	20.1987;22.4578;21.2785;28.7171;24.1682	14.5817;15.9654;15.4369;19.5196;17.1827	32.2415;37.195;33.8509;53.5243;40.4119	5	0	5	24423;300850;499422;116686;29487	1386985_at;1372297_at;1371942_at;1369061_at;1368409_at	23.3641	22.4578	3.33512	16.5373
GO:0006753	5	nucleoside phosphate metabolic process	384	405	8	8	8	0.69667	0.4415	0.70304	1.98	688283;298490;64305;58819;314312;192281;29516;24651	Afmid;Ppcs;Sult1b1;Txnrd1;Entpd5;Oas1a;Pde3b;Pklr	1396300_at,1396301_x_at;1388756_at;1387314_at;1386958_at;1372774_at,1382434_at,1382544_at;1371152_a_at;1369157_at;1368651_at,1387263_at		25.8485	25.1666	18.8759	5.59622	27.6779	5.66882	17.6108	17.6242	12.8709	3.53078	18.5482	3.72436	47.6548	44.563	29.5271	14.8575	53.0716	15.1782					31.613799999999998;18.8759;34.7354;21.6641;21.006220000000003;28.5593;27.3061;23.027	21.33885;13.7458;22.5803;15.6676;12.870903333333333;19.4349;19.0667;16.181649999999998	61.50750000000001;29.5271;74.2881;34.7079;41.02843333333333;53.0563;48.0975;39.02565	10	2	7	688283;298490;64305;58819;314312;192281;29516	1396300_at,1396301_x_at;1388756_at;1387314_at;1386958_at;1372774_at,1382434_at,1382544_at;1371152_a_at;1369157_at	26.2515	27.3061	5.91785	17.815
GO:0006754	8	ATP biosynthetic process	50	58	1	1	1	0.7208	0.6508	1	1.72	24651	Pklr	1368651_at,1387263_at		23.027	23.027	23.027		23.027		16.1816	16.1816	16.1816		16.1816		39.0256	39.0256	39.0256		39.0256						23.027	16.1816	39.0256	0	2	0
GO:0006757	7	ATP generation from ADP	27	30	1	1	1	0.89955	0.41934	0.41934	3.33	24651	Pklr	1368651_at,1387263_at		23.027	23.027	23.027		23.027		16.1816	16.1816	16.1816		16.1816		39.0256	39.0256	39.0256		39.0256						23.027	16.1816	39.0256	0	2	0
GO:0006760	5	folic acid-containing compound metabolic process	25	27	1	1	1	0.91611	0.38686	0.38686	3.7	299857	Shmt2	1388695_at		7.86658	7.86658	7.86658		7.86658		2.76025	2.76025	2.76025		2.76025		20.2174	20.2174	20.2174		20.2174						7.86658	2.76025	20.2174	1	0	1	299857	1388695_at	7.86658	7.86658		2.76025
GO:0006778	5	porphyrin-containing compound metabolic process	32	34	4	4	4	0.99968	0.0030644	0.0030644	11.76	24297;24296;24299;65155	Cyp1a2;Cyp1a1;Cyp2a3;Alas1	1387243_at;1370269_at;1369136_at;1367982_at		4.43885	5.38959	0.140946	2.99656	4.23875	3.45751	0.845268	0.15278	0.0512492	1.4537	1.29802	1.6633	15.2538	15.4095	13.316	1.54831	15.108	1.59337	0.5	2.42696	2.5	6.45073	6.06621;0.140946;4.71298;6.83525	0.185991;0.0512492;0.11957;3.02426	16.8801;13.316;14.7999;16.0192	4	0	4	24297;24296;24299;65155	1387243_at;1370269_at;1369136_at;1367982_at	4.43885	5.38959	2.99656	0.845268
GO:0006779	6	porphyrin-containing compound biosynthetic process	22	22	1	1	1	0.94151	0.32867	0.32867	4.55	65155	Alas1	1367982_at		6.83525	6.83525	6.83525		6.83525		3.02426	3.02426	3.02426		3.02426		16.0192	16.0192	16.0192		16.0192						6.83525	3.02426	16.0192	1	0	1	65155	1367982_at	6.83525	6.83525		3.02426
GO:0006782	7	protoporphyrinogen IX biosynthetic process	8	8	1	1	1	0.99165	0.13483	0.13483	12.5	65155	Alas1	1367982_at		6.83525	6.83525	6.83525		6.83525		3.02426	3.02426	3.02426		3.02426		16.0192	16.0192	16.0192		16.0192		0	6.83525	0	6.83525	6.83525	3.02426	16.0192	1	0	1	65155	1367982_at	6.83525	6.83525		3.02426
GO:0006790	4	sulfur compound metabolic process	220	229	9	9	9	0.99163	0.022454	0.022454	3.93	64305;24423;300850;499422;291671;65185;116686;25303;29487	Sult1b1;Gstm1;Gsta4;Gstt3;Hspa9;Sult1c3;Gsr;Abcc2;Gstt2	1387314_at;1386985_at;1372297_at;1371942_at;1389930_at;1369296_at;1369061_at;1368497_at;1368409_at		23.3301	22.4578	0.0171458	11.6991	26.1375	9.43738	15.9963	15.9654	2.85172e-09	7.37218	17.8005	5.6183	44.6123	37.195	0.117549	30.0417	50.4267	26.3185					34.7354;20.1987;22.4578;21.2785;0.01714575;41.6086;28.7171;16.7895;24.1682	22.5803;14.5817;15.9654;15.4369;2.85172E-9;26.3117;19.5196;12.3882;17.1827	74.2881;32.2415;37.195;33.8509;0.1175485;104.388;53.5243;25.4932;40.4119	9	0	9	64305;24423;300850;499422;291671;65185;116686;25303;29487	1387314_at;1386985_at;1372297_at;1371942_at;1389930_at;1369296_at;1369061_at;1368497_at;1368409_at	23.3301	22.4578	11.6991	15.9963
GO:0006793	4	phosphorus metabolic process	1477	1544	27	26	26	0.41282	0.66579	0.83776	1.68	64473;688283;298490;171125;64305;58819;305419;287603;679692;291132;309957;361730;313278;314312;192281;58919;291671;24913;25476;29516;171129;24651;25080;83472;24162;24484	Bpnt1;Afmid;Ppcs;Ptprh;Sult1b1;Txnrd1;Pi4k2b;Tex14;Lpgat1;Gpld1;Mef2a;Dak;Ptprd;Entpd5;Oas1a;Ccnd1;Hspa9;Pla2g16;Lgals9;Pde3b;Uggt1;Pklr;Apoa4;Ugdh;Acp2;Igfbp3	1398317_at;1396300_at,1396301_x_at;1388756_at;1387444_at;1387314_at;1386958_at;1384950_at;1382487_at;1397880_at;1380833_at;1378360_at;1377048_at;1376619_at;1372774_at,1382434_at,1382544_at;1371152_a_at;1371150_at,1371643_at,1383075_at;1389930_at;1370202_at;1387027_a_at;1369157_at;1368953_at;1368651_at,1387263_at;1368520_at;1367938_at;1367906_at;1367652_at	313278(-0.121)	22.073	22.3455	0.0171458	11.669	4.84516		14.2027	15.9246	2.85172e-09	8.45202	0.0930854		1.00004e+06	49.0803	0.117549	4.89693e+06	498350						13.3274;31.613799999999998;18.8759;11.7156;34.7354;21.6641;39.7988;4.86357;20.1019;9.29434;33.9069;28.0913;37.1251;21.006220000000003;28.5593;15.557466666666665;0.01714575;6.36787;36.5565;27.3061;25.5557;23.027;0.44934;20.3319;27.523;36.5276	10.0313;21.33885;13.7458;0.109207;22.5803;15.6676;24.9151;0.107723;14.5212;4.33067;21.8155;19.1821;23.7079;12.870903333333333;19.4349;11.556399999999998;2.85172E-9;0.0860943;23.4439;19.0667;17.7745;16.181649999999998;0.0892025;14.7989;18.8722;23.0409	19.3769;61.50750000000001;29.5271;2.5E7;74.2881;34.7079;97.6928;500000.0;32.0384;24.0279;72.9728;51.6873;84.495;41.02843333333333;53.0563;23.282066666666665;0.1175485;29.194;81.9429;48.0975;44.7408;39.02565;500000.0;32.0222;50.0632;84.1046	20	12	17	64473;688283;298490;171125;64305;58819;305419;679692;314312;192281;291671;25476;29516;171129;25080;83472;24162	1398317_at;1396300_at,1396301_x_at;1388756_at;1387444_at;1387314_at;1386958_at;1384950_at;1397880_at;1372774_at,1382434_at,1382544_at;1371152_a_at;1389930_at;1387027_a_at;1369157_at;1368953_at;1368520_at;1367938_at;1367906_at	22.3022	21.6641	11.2971	14.6624
GO:0006796	5	phosphate-containing compound metabolic process	1460	1526	25	24	24	0.28318	0.78424	0.53836	1.57	64473;688283;298490;171125;64305;58819;305419;287603;679692;291132;309957;361730;313278;314312;192281;58919;291671;24913;25476;29516;24651;25080;24162;24484	Bpnt1;Afmid;Ppcs;Ptprh;Sult1b1;Txnrd1;Pi4k2b;Tex14;Lpgat1;Gpld1;Mef2a;Dak;Ptprd;Entpd5;Oas1a;Ccnd1;Hspa9;Pla2g16;Lgals9;Pde3b;Pklr;Apoa4;Acp2;Igfbp3	1398317_at;1396300_at,1396301_x_at;1388756_at;1387444_at;1387314_at;1386958_at;1384950_at;1382487_at;1397880_at;1380833_at;1378360_at;1377048_at;1376619_at;1372774_at,1382434_at,1382544_at;1371152_a_at;1371150_at,1371643_at,1383075_at;1389930_at;1370202_at;1387027_a_at;1369157_at;1368651_at,1387263_at;1368520_at;1367906_at;1367652_at	313278(-0.121)	22.0005	22.3455	0.0171458	12.1384	4.84708		14.029	15.9246	2.85172e-09	8.77763	0.0947663		1.08338e+06	50.8753	0.117549	5.09617e+06	498301						13.3274;31.613799999999998;18.8759;11.7156;34.7354;21.6641;39.7988;4.86357;20.1019;9.29434;33.9069;28.0913;37.1251;21.006220000000003;28.5593;15.557466666666665;0.01714575;6.36787;36.5565;27.3061;23.027;0.44934;27.523;36.5276	10.0313;21.33885;13.7458;0.109207;22.5803;15.6676;24.9151;0.107723;14.5212;4.33067;21.8155;19.1821;23.7079;12.870903333333333;19.4349;11.556399999999998;2.85172E-9;0.0860943;23.4439;19.0667;16.181649999999998;0.0892025;18.8722;23.0409	19.3769;61.50750000000001;29.5271;2.5E7;74.2881;34.7079;97.6928;500000.0;32.0384;24.0279;72.9728;51.6873;84.495;41.02843333333333;53.0563;23.282066666666665;0.1175485;29.194;81.9429;48.0975;39.02565;500000.0;50.0632;84.1046	18	12	15	64473;688283;298490;171125;64305;58819;305419;679692;314312;192281;291671;25476;29516;25080;24162	1398317_at;1396300_at,1396301_x_at;1388756_at;1387444_at;1387314_at;1386958_at;1384950_at;1397880_at;1372774_at,1382434_at,1382544_at;1371152_a_at;1389930_at;1387027_a_at;1369157_at;1368520_at;1367906_at	22.2167	21.6641	12.0339	14.4458
GO:0006801	5	superoxide metabolic process	24	27	2	2	2	0.98787	0.083888	0.083888	7.41	24314;25080	Nqo1;Apoa4	1387599_a_at;1368520_at		4.58674	4.58674	0.44934	5.85117	0.860833	2.5439	1.64091	1.64091	0.0892025	2.19444	0.24353	0.95407	250011	250011	22.2679	353538	475137	153706	0.5	4.58674			8.72415;0.44934	3.19261;0.0892025	22.2679;500000.0	2	0	2	24314;25080	1387599_a_at;1368520_at	4.58674	4.58674	5.85117	1.64091
GO:0006805	4	xenobiotic metabolic process	72	93	13	13	13	1	1.0319e-08	1.0319e-08	13.98	292728;171518;64305;24297;24423;501907;300850;286954;293989;24296;24894;24299;25426	Cyp2b21;Cyp2c22;Sult1b1;Cyp1a2;Gstm1;RGD1559459;Gsta4;Ugt2b1;Cyp2c6v1;Cyp1a1;Cyp2a1;Cyp2a3;Cyp1b1	1387993_at;1387949_at;1387314_at;1387243_at;1386985_at;1381852_at;1372297_at;1370698_at;1370580_a_at;1370269_at;1387511_at;1369136_at;1368990_at		11.8194	6.06621	0.0904144	13.1207	12.4678	13.781	7.32328	0.185991	0.0374753	9.36025	7.90362	9.6141	38488	18.0087	0.594918	138667	2159.44	33894.8	3.5	0.567115	8.5	21.3282	0.401481;30.3304;34.7354;6.06621;20.1987;6.38914;22.4578;0.0904144;0.147057;0.140946;0.732749;4.71298;27.2489	0.0843416;20.3727;22.5803;0.185991;14.5817;2.35873;15.9654;0.0374753;0.0493054;0.0512492;0.0943336;0.11957;18.7215	500000.0;58.51;74.2881;16.8801;32.2415;15.8599;37.195;0.594918;13.512;13.316;18.0087;14.7999;49.2941	13	0	13	292728;171518;64305;24297;24423;501907;300850;286954;293989;24296;24894;24299;25426	1387993_at;1387949_at;1387314_at;1387243_at;1386985_at;1381852_at;1372297_at;1370698_at;1370580_a_at;1370269_at;1387511_at;1369136_at;1368990_at	11.8194	6.06621	13.1207	7.32328
GO:0006807	3	nitrogen compound metabolic process	5039	5394	97	95	95	0.4344	0.61813	0.83948	1.76	290802;688283;296959;305844;295160;304608;300474;266730;307395;297768;312688;298490;361643;299857;116548;171402;25419;171400;171125;64305;24297;25627;24423;58819;294079;297783;363017;298884;311078;286896;287603;298693;311021;291132;364070;308519;360481;309957;309544;313837;363465;300803;360547;313278;363285;298652;303735;680945;314312;294400;300211;310670;292949;300850;499422;310864;296654;192281…	Ubxn8;Afmid;Cpa2;Rnase1l2;Mnd1;Mmp19;Adamts15;Slc17a3;Ablim3;Lactb2;Usp18;Ppcs;Lcmt1;Shmt2;Pcsk5;Elovl6;Crp;Elovl5;Ptprh;Sult1b1;Cyp1a2;Cma1;Gstm1;Txnrd1;March5;Mybl1;Taf1d;Gen1;Psmd14;Sgpl1;Tex14;Isg15;Nmi;Gpld1;Iars2;Dpy19l3;Dnaja3;Mef2a;Rbm20;RGD1562284;Pir;Lactb;Sat2;Ptprd;Scly;Ube4b;Rnf213;Sdf2l1;Entpd5;Nus1;Fkbp11;Adamtsl4;Perp;Gsta4;Gstt3;Manba;Gsn;Oas1a;Ccnd1;Txnip;Hspa9;Akr1c14;Cyp3a9;Cy…	1397349_at;1396300_at,1396301_x_at;1393397_at;1393026_at;1391626_at;1391095_at;1390931_at;1390591_at;1390255_at;1389551_at;1389034_at;1388756_at;1388747_at;1388695_at;1392773_at;1388108_at;1387830_at;1387630_at;1387444_at;1387314_at;1387243_at;1387173_at;1386985_at;1386958_at;1385790_at;1385132_at;1385109_at;1384102_at;1386073_at;1382843_at;1382487_at;1382314_at;1381875_at;1380833_at;1380561_at;1…	116548(-0.2018);363017(-0.3027);313278(-0.121);294400(0.1633)	21.0287	22.451	0.0171458	12.91	4.8051		13.4876	15.9613	2.85172e-09	8.99026	0.0581756		1.6825e+06	47.9633	0.117549	6.1465e+06	491521						3.99879;31.613799999999998;29.9005;0.130311;6.70004;29.5192;9.32139;37.2018;0.269704;17.3415;5.23919;18.8759;23.1385;7.86658;24.5208;9.61605;20.2265;35.3004;11.7156;34.7354;6.06621;0.01714575;20.1987;21.6641;37.9616;30.3994;48.7874;33.6809;39.2949;22.451;4.86357;29.9319;0.230619;9.29434;16.8616;35.0192;31.2133;33.9069;26.7666;22.0879;17.8188;39.5417;0.150424;37.1251;22.0766;21.3806;29.6021;46.470…	0.0301446;21.33885;19.5447;0.0308581;2.2455;20.2773;0.0394699;24.0738;0.064511;12.752;0.185977;13.7458;16.3715;2.76025;17.1812;2.85924;14.599;22.8512;0.109207;22.5803;0.185991;2.85172E-9;14.5817;15.6676;24.0916;20.4086;31.8194;21.1562;25.1873;15.9613;0.107723;20.1643;0.0445238;4.33067;12.6203;22.612299999999998;20.8292;21.8155;18.4547;15.7425;13.0639;25.2576;0.053226;23.7079;15.7357;15.41795;19.9…	14.9498;61.50750000000001;60.1257;500000.0;16.9955;54.4716;2.5E7;83.0684;14.6268;26.5328;15.8255;29.5271;38.7737;20.2174;42.1138;27.9604;32.2998;76.5826;2.5E7;74.2881;16.8801;0.1175485;32.2415;34.7079;88.4033;58.7317;58.59;75.2628;92.2647;37.1795;500000.0;57.2437;2.5E7;24.0279;24.9819;78.1673;61.4029;72.9728;47.9633;36.3545;27.4474;93.6454;6.28806;84.495;36.3291;34.380399999999995;56.2131;49.2709…	79	29	70	290802;688283;305844;295160;304608;266730;297768;312688;298490;299857;116548;171402;25419;171400;171125;64305;24297;24423;58819;294079;297783;311078;286896;298693;311021;364070;308519;360481;309544;363465;300803;363285;298652;303735;680945;314312;294400;300211;292949;300850;499422;310864;192281;291671;191574;171352;24296;25697;25357;60335;59295;81613;25476;25700;29516;25690;24299;116686;25426;171…	1397349_at;1396300_at,1396301_x_at;1393026_at;1391626_at;1391095_at;1390591_at;1389551_at;1389034_at;1388756_at;1388695_at;1392773_at;1388108_at;1387830_at;1387630_at;1387444_at;1387314_at;1387243_at;1386985_at;1386958_at;1385790_at;1385132_at;1386073_at;1382843_at;1382314_at;1381875_at;1380561_at;1379160_at,1393965_at;1378392_at;1391810_at;1377662_at;1375818_at;1374524_at;1374507_at,1376862_at;1…	20.7866	21.8703	11.9983	13.3957
GO:0006809	6	nitric oxide biosynthetic process	6	10	1	1	1	0.98689	0.16561	0.16561	10	25426	Cyp1b1	1368990_at		27.2489	27.2489	27.2489		27.2489		18.7215	18.7215	18.7215		18.7215		49.2941	49.2941	49.2941		49.2941		0	27.2489	0	27.2489	27.2489	18.7215	49.2941	1	0	1	25426	1368990_at	27.2489	27.2489		18.7215
GO:0006810	4	transport	2673	2801	48	46	46	0.27649	0.77573	0.5201	1.64	689931;266730;503568;116548;170496;89843;309187;296750;316313;291132;501162;360733;500132;302864;362911;100359823;305234;361846;296654;58919;81806;117514;24565;192129;29199;291671;170913;170824;81613;60586;84484;24536;25476;140668;24684;64558;29200;84384;25080;25303;83500;117106;24904;24311;29686;80881	Mgarp;Slc17a3;Slc13a4;Pcsk5;Lcn2;Cxadr;Atl3;Rint1;Dst;Gpld1;Mreg;Rtp4;Plekha8;Mmgt1;Mal2;Tmem167a;Stbd1;Vps26a;Gsn;Ccnd1;Serpina7;Txnip;Abcc1;Vmp1;Hfe;Hspa9;Abcb1a;Steap3;Ceacam1;Clcn4;Slc4a4;Lepr;Lgals9;Abcc3;Prlr;Fzd4;Inhba;Timm10b;Apoa4;Abcc2;Slc22a8;Scarb2;Slc22a1;Ddc;Scn1b;Serp1	1393627_at;1390591_at;1390532_at;1392773_at;1387011_at;1384816_at;1384797_at,1395973_at,1395980_at;1382797_at;1395274_at;1380833_at;1379376_at;1379285_at;1377446_at;1376168_at,1395325_s_at;1372755_at;1376272_s_at;1372602_at;1371705_at;1371414_at;1371150_at,1371643_at,1383075_at;1371143_at;1371131_a_at;1371005_at;1370807_at;1370772_a_at;1389930_at;1370464_at,1370465_at;1370374_at;1374620_at,138297…	116548(-0.2018);316313(-0.1821);500132(-0.25);24536(-0.2274);64558(0.3921);84384(0.3929)	21.5525	24.9921	0.0171458	14.5036	0.0205438		13.5212	17.1986	2.85172e-09	9.7289	0.0139077		1.24733e+06	53.0674	0.117549	5.20592e+06	-1837.65						14.6526;37.2018;30.3269;24.5208;39.4681;22.8164;29.6319;29.2583;36.1342;9.29434;35.6332;0.292383;26.3567;2.072798;28.3947;29.2859;6.36817;12.7625;0.530685;15.557466666666665;34.2065;28.4676;49.0723;7.25388;35.2166;0.01714575;2.461988;33.0854;30.432450000000003;23.7674;46.1392;14.379010000000001;36.5565;7.57916;25.46343333333333;0.0781713;38.44015;0.059326;0.44934;16.7895;39.8058;17.2256;31.5;9.66…	11.1178;24.0738;20.3709;17.1812;25.4163;16.18;19.787300000000002;19.8086;23.7496;4.33067;23.0095;0.0515247;18.2261;0.0564991;19.3462;19.8232;0.255943;9.6347;0.0822551;11.556399999999998;22.0522;19.3855;28.7034;1.4702;22.8112;2.85172E-9;0.077203;21.3888;20.409799999999997;16.9591;22.1961;5.44549525;23.4439;0.120481;17.215933333333336;1.15429E-7;24.11155;0.0386051;0.0892025;12.3882;24.25;12.8141;20…	21.0678;83.0684;58.4989;42.1138;92.3515;38.0215;60.193999999999996;55.1555;77.396;24.0279;77.9669;2.5E7;46.8537;14.753499999999999;52.5715;55.2398;18.8269;18.4384;21.0222;23.282066666666665;73.6665;52.7858;167.065;20.0989;76.2381;0.1175485;10.065059999999999;70.0105;59.101;39.4095;48.2335;6375024.07585;81.9429;21.1976;46.798966666666665;2.5E7;53.34895;0.126429;500000.0;25.4932;102.264;25.8244;62.…	38	21	33	689931;266730;116548;170496;89843;309187;296750;316313;501162;360733;500132;302864;362911;100359823;305234;361846;192129;29199;291671;170913;81613;60586;84484;25476;140668;64558;84384;25080;25303;117106;24904;24311;80881	1393627_at;1390591_at;1392773_at;1387011_at;1384816_at;1384797_at,1395973_at,1395980_at;1382797_at;1395274_at;1379376_at;1379285_at;1377446_at;1376168_at,1395325_s_at;1372755_at;1376272_s_at;1372602_at;1371705_at;1370807_at;1370772_a_at;1389930_at;1370464_at,1370465_at;1374620_at,1382975_at;1379932_at;1372479_at;1387027_a_at;1369698_at;1369468_at;1368977_a_at;1368520_at;1368497_at;1368379_at;1368…	20.3787	23.7674	14.2301	12.819
GO:0006811	5	ion transport	974	1024	19	18	18	0.52634	0.57165	1	1.76	266730;503568;170496;302864;24565;29199;170913;170824;81613;60586;84484;25476;140668;25080;25303;83500;24904;29686	Slc17a3;Slc13a4;Lcn2;Mmgt1;Abcc1;Hfe;Abcb1a;Steap3;Ceacam1;Clcn4;Slc4a4;Lgals9;Abcc3;Apoa4;Abcc2;Slc22a8;Slc22a1;Scn1b	1390591_at;1390532_at;1387011_at;1376168_at,1395325_s_at;1371005_at;1370772_a_at;1370464_at,1370465_at;1370374_at;1374620_at,1382975_at;1379932_at;1372479_at;1387027_a_at;1369698_at;1368520_at;1368497_at;1385005_at;1368191_a_at;1387010_s_at		25.6785	30.9662	0.288393	16.4823	24.2666	14.9979	15.766	20.6928	0.0564991	10.5608	15.5363	10.1223	55611.8	66.1897	10.0651	161670	59474.6	166474					37.2018;30.3269;39.4681;2.072798;49.0723;35.2166;2.461988;33.0854;30.432450000000003;23.7674;46.1392;36.5565;7.57916;0.44934;16.7895;39.8058;31.5;0.288393	24.0738;20.3709;25.4163;0.0564991;28.7034;22.8112;0.077203;21.3888;20.409799999999997;16.9591;22.1961;23.4439;0.120481;0.0892025;12.3882;24.25;20.9758;0.057104	83.0684;58.4989;92.3515;14.753499999999999;167.065;76.2381;10.065059999999999;70.0105;59.101;39.4095;48.2335;81.9429;21.1976;500000.0;25.4932;102.264;62.3689;500000.0	16	5	13	266730;170496;302864;29199;170913;81613;60586;84484;25476;140668;25080;25303;24904	1390591_at;1387011_at;1376168_at,1395325_s_at;1370772_a_at;1370464_at,1370465_at;1374620_at,1382975_at;1379932_at;1372479_at;1387027_a_at;1369698_at;1368520_at;1368497_at;1368191_a_at	23.8181	30.4324	16.0867	14.5398
GO:0006812	6	cation transport	644	675	11	11	11	0.44491	0.67175	0.8815	1.63	266730;503568;302864;29199;170913;170824;84484;25303;83500;24904;29686	Slc17a3;Slc13a4;Mmgt1;Hfe;Abcb1a;Steap3;Slc4a4;Abcc2;Slc22a8;Slc22a1;Scn1b	1390591_at;1390532_at;1376168_at,1395325_s_at;1370772_a_at;1370464_at,1370465_at;1370374_at;1372479_at;1368497_at;1385005_at;1368191_a_at;1387010_s_at		24.9899	31.5	0.288393	16.6344	24.9571	14.4219	15.3314	20.9758	0.0564991	10.3003	15.9823	9.80349	45504.6	62.3689	10.0651	150739	16739.7	94176.6					37.2018;30.3269;2.072798;35.2166;2.461988;33.0854;46.1392;16.7895;39.8058;31.5;0.288393	24.0738;20.3709;0.0564991;22.8112;0.077203;21.3888;22.1961;12.3882;24.25;20.9758;0.057104	83.0684;58.4989;14.753499999999999;76.2381;10.065059999999999;70.0105;48.2335;25.4932;102.264;62.3689;500000.0	9	4	7	266730;302864;29199;170913;84484;25303;24904	1390591_at;1376168_at,1395325_s_at;1370772_a_at;1370464_at,1370465_at;1372479_at;1368497_at;1368191_a_at	24.4831	31.5	17.5192	14.6541
GO:0006814	8	sodium ion transport	132	133	4	4	4	0.90883	0.21637	0.30531	3.01	266730;503568;84484;29686	Slc17a3;Slc13a4;Slc4a4;Scn1b	1390591_at;1390532_at;1372479_at;1387010_s_at		28.4891	33.7644	0.288393	19.8838	28.4332	11.8976	16.6745	21.2835	0.057104	11.1809	18.7745	7.68491	125047	70.7836	48.2335	249968	54188.5	179369					37.2018;30.3269;46.1392;0.288393	24.0738;20.3709;22.1961;0.057104	83.0684;58.4989;48.2335;500000.0	2	2	2	266730;84484	1390591_at;1372479_at	41.6705	41.6705	6.3197	23.1349
GO:0006817	8	phosphate ion transport	15	15	1	1	1	0.97116	0.23786	0.23786	6.67	266730	Slc17a3	1390591_at		37.2018	37.2018	37.2018		37.2018		24.0738	24.0738	24.0738		24.0738		83.0684	83.0684	83.0684		83.0684		0	37.2018			37.2018	24.0738	83.0684	1	0	1	266730	1390591_at	37.2018	37.2018		24.0738
GO:0006820	6	anion transport	398	417	13	12	12	0.9622	0.072812	0.091252	2.88	266730;503568;24565;170913;81613;60586;84484;140668;25080;25303;83500;24904	Slc17a3;Slc13a4;Abcc1;Abcb1a;Ceacam1;Clcn4;Slc4a4;Abcc3;Apoa4;Abcc2;Slc22a8;Slc22a1	1390591_at;1390532_at;1371005_at;1370464_at,1370465_at;1374620_at,1382975_at;1379932_at;1372479_at;1369698_at;1368520_at;1368497_at;1385005_at;1368191_a_at		26.2938	30.3797	0.44934	16.3973	21.9574	15.1318	15.8845	20.3903	0.077203	10.3088	14.0755	10.2913	41723.1	58.7999	10.0651	144320	72955.1	184289					37.2018;30.3269;49.0723;2.461988;30.432450000000003;23.7674;46.1392;7.57916;0.44934;16.7895;39.8058;31.5	24.0738;20.3709;28.7034;0.077203;20.409799999999997;16.9591;22.1961;0.120481;0.0892025;12.3882;24.25;20.9758	83.0684;58.4989;167.065;10.065059999999999;59.101;39.4095;48.2335;21.1976;500000.0;25.4932;102.264;62.3689	11	3	9	266730;170913;81613;60586;84484;140668;25080;25303;24904	1390591_at;1370464_at,1370465_at;1374620_at,1382975_at;1379932_at;1372479_at;1369698_at;1368520_at;1368497_at;1368191_a_at	21.8134	23.7674	16.0438	13.0322
GO:0006821	8	chloride transport	78	82	1	1	1	0.56573	0.77437	1	1.22	60586	Clcn4	1379932_at		23.7674	23.7674	23.7674		23.7674		16.9591	16.9591	16.9591		16.9591		39.4095	39.4095	39.4095		39.4095						23.7674	16.9591	39.4095	1	0	1	60586	1379932_at	23.7674	23.7674		16.9591
GO:0006824	8	cobalt ion transport	5	5	1	1	1	0.99691	0.086532	0.086532	20	302864	Mmgt1	1376168_at,1395325_s_at		2.0728	2.0728	2.0728		2.0728		0.0564991	0.0564991	0.0564991		0.0564991		14.7535	14.7535	14.7535		14.7535		0	2.0728	0	2.0728	2.0728	0.0564991	14.7535	2	0	1	302864	1376168_at,1395325_s_at	2.0728	2.0728		0.0564991
GO:0006825	9	copper ion transport	15	15	2	2	2	0.99779	0.028842	0.028842	13.33	302864;170824	Mmgt1;Steap3	1376168_at,1395325_s_at;1370374_at		17.5791	17.5791	2.0728	21.9292	23.3285	20.3661	10.7226	10.7226	0.0564991	15.0842	14.6774	14.009	42.382	42.382	14.7535	39.0726	52.626	36.2876	0	2.0728	0.5	17.5791	2.072798;33.0854	0.0564991;21.3888	14.753499999999999;70.0105	2	1	1	302864	1376168_at,1395325_s_at	2.0728	2.0728		0.0564991
GO:0006826	9	iron ion transport	28	34	3	3	3	0.99694	0.022642	0.022642	8.82	302864;29199;170824	Mmgt1;Hfe;Steap3	1376168_at,1395325_s_at;1370772_a_at;1370374_at		23.4583	33.0854	2.0728	18.551	27.086	16.0806	14.7522	21.3888	0.0564991	12.7467	17.2483	11.0508	53.6674	70.0105	14.7535	33.8439	60.0891	29.2613	0.5	17.5791			2.072798;35.2166;33.0854	0.0564991;22.8112;21.3888	14.753499999999999;76.2381;70.0105	3	1	2	302864;29199	1376168_at,1395325_s_at;1370772_a_at	18.6447	18.6447	23.4362	11.4338
GO:0006836	5	neurotransmitter transport	126	130	2	2	2	0.58644	0.68065	1	1.54	24904;24311	Slc22a1;Ddc	1368191_a_at;1368064_a_at		20.5844	20.5844	9.66871	15.4371	26.1218	13.3032	10.5154	10.5154	0.0550111	14.7932	15.8219	12.7484	47.0989	47.0989	31.8289	21.595	54.8453	18.61					31.5;9.66871	20.9758;0.0550111	62.3689;31.8289	2	0	2	24904;24311	1368191_a_at;1368064_a_at	20.5844	20.5844	15.4371	10.5154
GO:0006839	5	mitochondrial transport	86	97	1	1	1	0.4781	0.82835	1	1.03	689931	Mgarp	1393627_at		14.6526	14.6526	14.6526		14.6526		11.1178	11.1178	11.1178		11.1178		21.0678	21.0678	21.0678		21.0678						14.6526	11.1178	21.0678	1	0	1	689931	1393627_at	14.6526	14.6526		11.1178
GO:0006842	8	tricarboxylic acid transport	7	7	1	1	1	0.99366	0.11902	0.11902	14.29	503568	Slc13a4	1390532_at		30.3269	30.3269	30.3269		30.3269		20.3709	20.3709	20.3709		20.3709		58.4989	58.4989	58.4989		58.4989		0	30.3269	0	30.3269	30.3269	20.3709	58.4989	0	1	0
GO:0006855	6	drug transmembrane transport	62	66	6	6	6	0.99983	0.0011544	0.0011544	9.09	266730;24565;170913;140668;25303;24904	Slc17a3;Abcc1;Abcb1a;Abcc3;Abcc2;Slc22a1	1390591_at;1371005_at;1370464_at,1370465_at;1369698_at;1368497_at;1368191_a_at		24.1008	24.1447	2.46199	18.1363	19.1597	16.8394	14.3898	16.682	0.077203	12.2842	11.6066	11.8473	61.543	43.931	10.0651	58.611	43.9489	41.9776	2.5	24.1447			37.2018;49.0723;2.461988;7.57916;16.7895;31.5	24.0738;28.7034;0.077203;0.120481;12.3882;20.9758	83.0684;167.065;10.065059999999999;21.1976;25.4932;62.3689	6	1	5	266730;170913;140668;25303;24904	1390591_at;1370464_at,1370465_at;1369698_at;1368497_at;1368191_a_at	19.1065	16.7895	14.9694	11.5271
GO:0006857	7	oligopeptide transport	9	9	2	2	2	0.99956	0.010611	0.010611	22.22	24565;83500	Abcc1;Slc22a8	1371005_at;1385005_at		44.439	44.439	39.8058	6.5524	41.7898	5.37556	26.4767	26.4767	24.25	3.14903	25.2035	2.58345	134.665	134.665	102.264	45.8212	116.138	37.5915	0	39.8058	0	39.8058	49.0723;39.8058	28.7034;24.25	167.065;102.264	0	2	0
GO:0006869	6	lipid transport	201	208	10	9	9	0.99567	0.012782	0.012782	4.33	500132;24565;170913;81613;140668;64558;29200;25080;25303	Plekha8;Abcc1;Abcb1a;Ceacam1;Abcc3;Fzd4;Inhba;Apoa4;Abcc2	1377446_at;1371005_at;1370464_at,1370465_at;1374620_at,1382975_at;1369698_at;1369468_at;1369012_at,1383486_at;1368520_at;1368497_at	500132(-0.25);64558(0.3921)	19.0733	16.7895	0.0781713	17.9514	13.3743	15.7108	11.5695	12.3882	1.15429e-07	11.741	8.13205	10.7014	2.83338e+06	53.349	10.0651	8.31413e+06	1.13569e+06	5.19504e+06					26.3567;49.0723;2.461988;30.432450000000003;7.57916;0.0781713;38.44015;0.44934;16.7895	18.2261;28.7034;0.077203;20.409799999999997;0.120481;1.15429E-7;24.11155;0.0892025;12.3882	46.8537;167.065;10.065059999999999;59.101;21.1976;2.5E7;53.34895;500000.0;25.4932	9	3	7	500132;170913;81613;140668;64558;25080;25303	1377446_at;1370464_at,1370465_at;1374620_at,1382975_at;1369698_at;1369468_at;1368520_at;1368497_at	12.021	7.57916	12.6153	7.33014
GO:0006873	6	cellular ion homeostasis	503	522	5	5	5	0.088762	0.96039	0.17598	0.96	245920;29199;60628;84484;25303	Cxcl10;Hfe;Cxcr4;Slc4a4;Abcc2	1387969_at;1370772_a_at;1389244_x_at;1372479_at;1368497_at		19.7412	16.7895	0.235955	20.6307	9.13257	16.3186	11.4894	12.3882	0.0107916	11.2522	5.82666	10.5062	1e+07	76.2381	25.4932	1.3693e+07	1.77447e+07	1.26858e+07					0.324767;35.2166;0.235955;46.1392;16.7895	0.0408567;22.8112;0.0107916;22.1961;12.3882	2.5E7;76.2381;2.5E7;48.2335;25.4932	4	1	4	245920;29199;84484;25303	1387969_at;1370772_a_at;1372479_at;1368497_at	24.6175	26.0031	20.2232	14.3591
GO:0006874	9	cellular calcium ion homeostasis	364	378	2	2	2	0.032035	0.99218	0.07209	0.53	245920;60628	Cxcl10;Cxcr4	1387969_at;1389244_x_at		0.280361	0.280361	0.235955	0.0627996	0.2936	0.0599438	0.0258242	0.0258242	0.0107916	0.0212592	0.0303058	0.0202925	25000000	25000000	25000000	0	25000000	0					0.324767;0.235955	0.0408567;0.0107916	2.5E7;2.5E7	1	1	1	245920	1387969_at	0.324767	0.324767		0.0408567
GO:0006875	8	cellular metal ion homeostasis	442	460	3	3	3	0.032334	0.99015	0.070136	0.65	245920;29199;60628	Cxcl10;Hfe;Cxcr4	1387969_at;1370772_a_at;1389244_x_at		11.9258	0.324767	0.235955	20.1705	7.99144	17.7303	7.62095	0.0408567	0.0107916	13.1552	5.05175	11.5658	1.66667e+07	25000000	76.2381	1.44337e+07	1.94894e+07	1.26924e+07					0.324767;35.2166;0.235955	0.0408567;22.8112;0.0107916	2.5E7;76.2381;2.5E7	2	1	2	245920;29199	1387969_at;1370772_a_at	17.7707	17.7707	24.6723	11.426
GO:0006879	10	cellular iron ion homeostasis	36	38	1	1	1	0.85177	0.4978	0.4978	2.63	29199	Hfe	1370772_a_at		35.2166	35.2166	35.2166		35.2166		22.8112	22.8112	22.8112		22.8112		76.2381	76.2381	76.2381		76.2381						35.2166	22.8112	76.2381	1	0	1	29199	1370772_a_at	35.2166	35.2166		22.8112
GO:0006885	9	regulation of pH	70	72	1	1	1	0.62867	0.72931	1	1.39	84484	Slc4a4	1372479_at		46.1392	46.1392	46.1392		46.1392		22.1961	22.1961	22.1961		22.1961		48.2335	48.2335	48.2335		48.2335						46.1392	22.1961	48.2335	1	0	1	84484	1372479_at	46.1392	46.1392		22.1961
GO:0006886	5	intracellular protein transport	557	586	6	6	6	0.093722	0.955	0.19932	1.02	689931;360733;361846;117514;291671;117106	Mgarp;Rtp4;Vps26a;Txnip;Hspa9;Scarb2	1393627_at;1379285_at;1371705_at;1371131_a_at;1389930_at;1368379_at		12.2363	13.7075	0.0171458	10.8299	16.2199	11.7724	8.83394	10.3763	2.85172e-09	7.59215	11.4616	8.06395	4.16669e+06	23.4461	0.117549	1.02062e+07	5.08487e+06	1.10235e+07					14.6526;0.292383;12.7625;28.4676;0.01714575;17.2256	11.1178;0.0515247;9.6347;19.3855;2.85172E-9;12.8141	21.0678;2.5E7;18.4384;52.7858;0.1175485;25.8244	5	1	5	689931;360733;361846;291671;117106	1393627_at;1379285_at;1371705_at;1389930_at;1368379_at	8.99005	12.7625	8.22014	6.72362
GO:0006887	5	exocytosis	140	144	2	2	2	0.52062	0.73381	1	1.39	192129;170824	Vmp1;Steap3	1370807_at;1370374_at		20.1696	20.1696	7.25388	18.2656	22.2922	18.0173	11.4295	11.4295	1.4702	14.0846	13.0662	13.8931	45.0547	45.0547	20.0989	35.2928	49.1559	34.813					7.25388;33.0854	1.4702;21.3888	20.0989;70.0105	1	1	1	192129	1370807_at	7.25388	7.25388		1.4702
GO:0006888	5	ER to Golgi vesicle-mediated transport	101	103	1	1	1	0.44566	0.84614	1	0.97	309187	Atl3	1384797_at,1395973_at,1395980_at		29.6319	29.6319	29.6319		29.6319		19.7873	19.7873	19.7873		19.7873		60.194	60.194	60.194		60.194						29.6319	19.7873	60.194	3	0	1	309187	1384797_at,1395973_at,1395980_at	29.6319	29.6319		19.7873
GO:0006890	7	retrograde vesicle-mediated transport, Golgi to ER	38	38	1	1	1	0.85177	0.4978	0.4978	2.63	296750	Rint1	1382797_at		29.2583	29.2583	29.2583		29.2583		19.8086	19.8086	19.8086		19.8086		55.1555	55.1555	55.1555		55.1555						29.2583	19.8086	55.1555	1	0	1	296750	1382797_at	29.2583	29.2583		19.8086
GO:0006897	6	endocytosis	306	319	3	3	3	0.17182	0.92866	0.38678	0.94	81613;24536;117106	Ceacam1;Lepr;Scarb2	1374620_at,1382975_at;1370604_at,1370605_s_at,1371223_a_at,1388232_a_at;1368379_at	24536(-0.2274)	20.679	17.2256	14.379	8.56579	20.6224	8.69296	12.8898	12.8141	5.4455	7.48244	12.6286	7.7179	2.12504e+06	59.101	25.8244	3.6806e+06	2.37933e+06	3.77629e+06					30.432450000000003;14.379010000000001;17.2256	20.409799999999997;5.44549525;12.8141	59.101;6375024.07585;25.8244	3	4	2	81613;117106	1374620_at,1382975_at;1368379_at	23.829	23.829	9.33865	16.612
GO:0006898	7	receptor-mediated endocytosis	151	156	2	2	2	0.46705	0.77323	1	1.28	81613;117106	Ceacam1;Scarb2	1374620_at,1382975_at;1368379_at		23.829	23.829	17.2256	9.33865	24.3402	9.31063	16.612	16.612	12.8141	5.37097	16.9059	5.35486	42.4627	42.4627	25.8244	23.5301	43.7506	23.4595					30.432450000000003;17.2256	20.409799999999997;12.8141	59.101;25.8244	3	0	2	81613;117106	1374620_at,1382975_at;1368379_at	23.829	23.829	9.33865	16.612
GO:0006909	7	phagocytosis	50	54	1	1	1	0.74749	0.62446	0.62446	1.85	24536	Lepr	1370604_at,1370605_s_at,1371223_a_at,1388232_a_at	24536(-0.2274)	14.379	14.379	14.379		14.379		5.4455	5.4455	5.4455		5.4455		6.37502e+06	6.37502e+06	6.37502e+06		6.37502e+06						14.379	5.4455	6.37502e+06	0	4	0
GO:0006911	7	phagocytosis, engulfment	33	36	1	1	1	0.86412	0.47924	0.47924	2.78	296654	Gsn	1371414_at		0.530685	0.530685	0.530685		0.530685		0.0822551	0.0822551	0.0822551		0.0822551		21.0222	21.0222	21.0222		21.0222						0.530685	0.0822551	21.0222	0	1	0
GO:0006913	6	nucleocytoplasmic transport	159	169	2	2	2	0.41266	0.81011	0.77248	1.18	117514;291671	Txnip;Hspa9	1371131_a_at;1389930_at		14.2424	14.2424	0.0171458	20.1175	25.2754	12.6989	9.69275	9.69275	2.85172e-09	13.7076	17.2104	8.65271	26.4517	26.4517	0.117549	37.2421	46.8762	23.5085					28.4676;0.01714575	19.3855;2.85172E-9	52.7858;0.1175485	1	1	1	291671	1389930_at	0.0171458	0.0171458		2.85172e-09
GO:0006914	4	autophagy	117	126	3	3	3	0.80957	0.39425	0.49533	2.38	619558;305234;192129	Fam134b;Stbd1;Vmp1	1373011_at;1372602_at;1370807_at	619558(0.3826)	15.2237	7.25388	6.36817	14.5779	11.174	11.859	7.66028	1.4702	0.255943	11.7888	4.33201	9.6279	34.3944	20.0989	18.8269	25.8699	27.2404	21.0234					32.0491;6.36817;7.25388	21.2547;0.255943;1.4702	64.2574;18.8269;20.0989	3	0	3	619558;305234;192129	1373011_at;1372602_at;1370807_at	15.2237	7.25388	14.5779	7.66028
GO:0006915	5	apoptotic process	399	424	8	8	8	0.64903	0.49291	0.85131	1.89	360481;309957;310670;296654;170824;246097;116683;25690	Dnaja3;Mef2a;Adamtsl4;Gsn;Steap3;Fas;Efna5;Ahr	1378392_at;1378360_at;1372426_at;1371414_at;1370374_at;1397221_s_at;1375647_at;1369146_a_at	116683(0.1685)	20.2578	29.4578	0.0158072	16.6346	15.4859	17.4682	13.1357	19.7032	6.31202e-05	10.8928	9.89593	11.4147	3.18754e+06	71.4916	21.0222	8.8153e+06	7.11643e+06	1.2031e+07					31.2133;33.9069;35.1211;0.530685;33.0854;0.0158072;27.7022;0.487373	20.8292;21.8155;22.3289;0.0822551;21.3888;6.31202E-5;18.5771;0.0641274	61.4029;72.9728;78.3307;21.0222;70.0105;500000.0;52.381;2.5E7	3	5	3	360481;246097;25690	1378392_at;1397221_s_at;1369146_a_at	10.5722	0.487373	17.8773	6.96446
GO:0006919	10	activation of cysteine-type endopeptidase activity involved in apoptotic process	63	67	2	2	2	0.88117	0.33882	0.33882	2.99	360481;299269	Dnaja3;Ifi27l2b	1378392_at;1376845_at		15.7341	15.7341	0.254908	21.8909	5.88255	16.885	10.4456	10.4456	0.0620163	14.6846	3.83709	11.3266	37.8965	37.8965	14.39	33.2431	22.936	25.6413					31.2133;0.254908	20.8292;0.0620163	61.4029;14.39	2	0	2	360481;299269	1378392_at;1376845_at	15.7341	15.7341	21.8909	10.4456
GO:0006924	9	activation-induced cell death of T cells	5	7	2	2	2	0.99981	0.0063382	0.0063382	28.57	360481;246097	Dnaja3;Fas	1378392_at;1397221_s_at		15.6146	15.6146	0.0158072	22.06	17.5893	21.8825	10.4146	10.4146	6.31202e-05	14.7284	11.7331	14.6099	250031	250031	61.4029	353510	218386	350666	0	0.0158072	0	0.0158072	31.2133;0.0158072	20.8292;6.31202E-5	61.4029;500000.0	2	0	2	360481;246097	1378392_at;1397221_s_at	15.6146	15.6146	22.06	10.4146
GO:0006925	6	inflammatory cell apoptotic process	4	4	1	1	1	0.99812	0.069844	0.069844	25	246097	Fas	1397221_s_at		0.0158072	0.0158072	0.0158072		0.0158072		6.31202e-05	6.31202e-05	6.31202e-05		6.31202e-05		500000	500000	500000		500000		0	0.0158072	0	0.0158072	0.0158072	6.31202e-05	500000	1	0	1	246097	1397221_s_at	0.0158072	0.0158072		6.31202e-05
GO:0006928	3	movement of cell or subcellular component	954	992	18	17	17	0.4845	0.61448	1	1.71	689931;245920;89843;286896;316313;291132;84422;94268;494344;260326;24565;60628;81613;116683;25426;29686;81707	Mgarp;Cxcl10;Cxadr;Sgpl1;Dst;Gpld1;Gfra3;Efna1;Ier2;Gpr56;Abcc1;Cxcr4;Ceacam1;Efna5;Cyp1b1;Scn1b;Mmp14	1393627_at;1387969_at;1384816_at;1382843_at;1395274_at;1380833_at;1377680_at;1372844_at;1372389_at;1371696_at;1371005_at;1389244_x_at;1374620_at,1382975_at;1375647_at;1368990_at;1387010_s_at;1367860_a_at	316313(-0.1821);116683(0.1685)	21.9065	24.0979	0.235955	14.6191	17.4479	13.2004	14.3094	16.7011	0.0107916	9.33874	11.4346	8.94203	2.97064e+06	52.381	16.7655	8.29243e+06	4.95353e+06	1.02597e+07					14.6526;0.324767;22.8164;22.451;36.1342;9.29434;24.0979;24.7896;7.3339;37.9776;49.0723;0.235955;30.432450000000003;27.7022;27.2489;0.288393;37.5583	11.1178;0.0408567;16.18;15.9613;23.7496;4.33067;16.7011;17.5606;3.92869;23.3019;28.7034;0.0107916;20.409799999999997;18.5771;18.7215;0.057104;23.9073	21.0678;2.5E7;38.0215;37.1795;77.396;24.0279;42.0531;41.8713;16.7655;93.5361;167.065;2.5E7;59.101;52.381;49.2941;500000.0;86.4955	9	9	8	689931;245920;89843;286896;316313;94268;81613;25426	1393627_at;1387969_at;1384816_at;1382843_at;1395274_at;1372844_at;1374620_at,1382975_at;1368990_at	22.3562	23.803	10.8882	15.4677
GO:0006935	4	chemotaxis	214	219	5	5	5	0.79926	0.3568	0.60047	2.28	245920;89843;24565;60628;116683	Cxcl10;Cxadr;Abcc1;Cxcr4;Efna5	1387969_at;1384816_at;1371005_at;1389244_x_at;1375647_at	116683(0.1685)	20.0303	22.8164	0.235955	20.5559	8.81376	14.6446	12.7024	16.18	0.0107916	12.4903	5.86563	9.68895	1.00001e+07	167.065	38.0215	1.3693e+07	1.6821e+07	1.31139e+07					0.324767;22.8164;49.0723;0.235955;27.7022	0.0408567;16.18;28.7034;0.0107916;18.5771	2.5E7;38.0215;167.065;2.5E7;52.381	2	3	2	245920;89843	1387969_at;1384816_at	11.5706	11.5706	15.904	8.11043
GO:0006936	5	muscle contraction	155	161	3	2	2	0.44566	0.78809	1	1.24	60628;29686	Cxcr4;Scn1b	1389244_x_at;1387010_s_at		0.262174	0.262174	0.235955	0.0370793	0.247164	0.0304016	0.0339478	0.0339478	0.0107916	0.0327478	0.020691	0.0268502	12750000	12750000	500000	1.73241e+07	1.97631e+07	1.42042e+07					0.235955;0.288393	0.0107916;0.057104	2.5E7;500000.0	0	2	0
GO:0006941	6	striated muscle contraction	83	87	2	2	2	0.79497	0.46447	0.67045	2.3	60628;29686	Cxcr4;Scn1b	1389244_x_at;1387010_s_at		0.262174	0.262174	0.235955	0.0370793	0.247164	0.0304016	0.0339478	0.0339478	0.0107916	0.0327478	0.020691	0.0268502	12750000	12750000	500000	1.73241e+07	1.97631e+07	1.42042e+07					0.235955;0.288393	0.0107916;0.057104	2.5E7;500000.0	0	2	0
GO:0006949	3	syncytium formation	25	26	2	2	2	0.98908	0.078572	0.078572	7.69	679806;309499	Fer1l5;Myof	1396729_at;1375857_at		32.9849	32.9849	27.1651	8.23044	32.5457	8.20697	22.0031	22.0031	18.6754	4.70601	21.7519	4.69259	68.4039	68.4039	49.061	27.355	66.9441	27.277	0.5	32.9849			38.8047;27.1651	25.3307;18.6754	87.7468;49.061	1	1	1	679806	1396729_at	38.8047	38.8047		25.3307
GO:0006950	3	response to stress	2282	2406	64	63	63	0.99955	0.0007834	0.0011431	2.62	308097;290802;689931;316010;680860;297989;288985;266766;245920;25419;24314;24297;170496;24423;24539;58819;89843;298884;311078;316313;298693;360733;360481;361659;309499;303163;298652;680945;296271;300850;296654;192281;58919;117514;24565;29199;291671;170913;294270;246074;24296;25697;60628;59295;246097;24536;25476;116686;25426;171129;56759;24614;24651;81813;25080;25303;65155;81707;100912108;83619;64…	Tagap;Ubxn8;Mgarp;Camp;Eppk1;Ddx58;Insig2;Rcan1;Cxcl10;Crp;Nqo1;Cyp1a2;Lcn2;Gstm1;Lpl;Txnrd1;Cxadr;Gen1;Psmd14;Dst;Isg15;Rtp4;Dnaja3;Plekha1;Myof;Igtp;Ube4b;Sdf2l1;Srxn1;Gsta4;Gsn;Oas1a;Ccnd1;Txnip;Abcc1;Hfe;Hspa9;Abcb1a;RT1-Db1;Scd1;Cyp1a1;Ctsl;Cxcr4;Nucb2;Fas;Lepr;Lgals9;Gsr;Cyp1b1;Uggt1;Rnase4;Orm1;Pklr;Klf10;Apoa4;Abcc2;Alas1;Mmp14;Nupr1;Nfe2l2;Glrx;Serp1;Igfbp3	1397958_at;1397349_at;1393627_at;1393603_at;1392012_at;1391463_at;1389377_at,1393690_at;1388686_at;1387969_at;1387830_at;1387599_a_at;1387243_at;1387011_at;1386985_at;1386965_at;1386958_at;1384816_at;1384102_at;1386073_at;1395274_at;1382314_at;1379285_at;1378392_at;1376762_at;1375857_at;1396163_at;1374507_at,1376862_at;1373043_at;1372510_at;1372297_at;1371414_at;1371152_a_at;1371150_at,1371643_at…	316313(-0.1821);296271(0.1277);24536(-0.2274)	20.6031	22.4578	0.0158072	14.3005	19.2875	13.9352	13.1277	15.9654	2.85172e-09	9.35255	12.3344	9.2836	2.50203e+06	49.6939	0.117549	7.40185e+06	3.53156e+06	8.59736e+06					35.1155;3.99879;14.6526;30.0616;7.07448;19.5705;18.81295;0.324769;0.324767;20.2265;8.72415;6.06621;39.4681;20.1987;36.9287;21.6641;22.8164;33.6809;39.2949;36.1342;29.9319;0.292383;31.2133;23.1615;27.1651;0.0853229;21.3806;46.4701;28.9693;22.4578;0.530685;28.5593;15.557466666666665;28.4676;49.0723;35.2166;0.01714575;2.461988;4.6979455;28.83;0.140946;0.119104;0.235955;25.1917;0.0158072;14.379010000…	22.1522;0.0301446;11.1178;20.2323;0.107778;14.1871;13.64725;0.0517397;0.0408567;14.599;3.19261;0.185991;25.4163;14.5817;23.617;15.6676;16.18;21.1562;25.1873;23.7496;20.1643;0.0515247;20.8292;16.1835;18.6754;5.00836E-7;15.41795;20.9139;19.6546;15.9654;0.0822551;19.4349;11.556399999999998;19.3855;28.7034;22.8112;2.85172E-9;0.077203;2.6781043;20.5359;0.0512492;0.0377096;0.0107916;17.8142;6.31202E-5;…	79.2566;14.9498;21.0678;57.6531;2.5E7;30.9363;29.77735;2.5E7;2.5E7;32.2998;22.2679;16.8801;92.3515;32.2415;83.6043;34.7079;38.0215;75.2628;92.2647;77.396;57.2437;2.5E7;61.4029;39.6472;49.061;2.5E7;34.380399999999995;49.2709;54.2794;37.195;21.0222;53.0563;23.282066666666665;52.7858;167.065;76.2381;0.1175485;10.065059999999999;250023.52665;49.6939;13.316;4.56418;2.5E7;42.7872;500000.0;6375024.07585…	51	23	46	290802;689931;680860;297989;288985;266766;245920;25419;24314;24297;170496;24423;24539;58819;89843;311078;316313;298693;360733;360481;303163;298652;680945;296271;300850;192281;29199;291671;170913;294270;246074;24296;25697;59295;246097;25476;116686;25426;171129;24614;25080;25303;65155;83619;64045;80881	1397349_at;1393627_at;1392012_at;1391463_at;1389377_at,1393690_at;1388686_at;1387969_at;1387830_at;1387599_a_at;1387243_at;1387011_at;1386985_at;1386965_at;1386958_at;1384816_at;1386073_at;1395274_at;1382314_at;1379285_at;1378392_at;1396163_at;1374507_at,1376862_at;1373043_at;1372510_at;1372297_at;1371152_a_at;1370772_a_at;1389930_at;1370464_at,1370465_at;1370382_at,1370383_s_at;1370355_at;137026…	18.8897	20.2126	14.3127	12.0026
GO:0006952	4	defense response	628	688	19	19	19	0.97724	0.040756	0.054522	2.76	308097;316010;297989;245920;25419;170496;89843;298693;360733;303163;192281;29199;294270;246074;25476;24614;25080;100912108;83619	Tagap;Camp;Ddx58;Cxcl10;Crp;Lcn2;Cxadr;Isg15;Rtp4;Igtp;Oas1a;Hfe;RT1-Db1;Scd1;Lgals9;Orm1;Apoa4;Nupr1;Nfe2l2	1397958_at;1393603_at;1391463_at;1387969_at;1387830_at;1387011_at;1384816_at;1382314_at;1379285_at;1396163_at;1371152_a_at;1370772_a_at;1370382_at,1370383_s_at;1370355_at;1387027_a_at;1368731_at;1368520_at;1367847_at;1367826_at		22.3304	28.5593	0.0853229	15.474	21.9022	16.0283	14.3454	19.4349	5.00836e-07	9.89576	14.0058	10.2789	3.98689e+06	76.2381	23.1149	9.3491e+06	4.46406e+06	9.77504e+06					35.1155;30.0616;19.5705;0.324767;20.2265;39.4681;22.8164;29.9319;0.292383;0.0853229;28.5593;35.2166;4.6979455;28.83;36.5565;47.8233;0.44934;35.7108;8.54018	22.1522;20.2323;14.1871;0.0408567;14.599;25.4163;16.18;20.1643;0.0515247;5.00836E-7;19.4349;22.8112;2.6781043;20.5359;23.4439;25.5109;0.0892025;22.5936;2.44081	79.2566;57.6531;30.9363;2.5E7;32.2998;92.3515;38.0215;57.2437;2.5E7;2.5E7;53.0563;76.2381;250023.52665;49.6939;81.9429;49.603;500000.0;80.9168;23.1149	17	3	16	297989;245920;25419;170496;89843;298693;360733;303163;192281;29199;294270;246074;25476;24614;25080;83619	1391463_at;1387969_at;1387830_at;1387011_at;1384816_at;1382314_at;1379285_at;1396163_at;1371152_a_at;1370772_a_at;1370382_at,1370383_s_at;1370355_at;1387027_a_at;1368731_at;1368520_at;1367826_at	20.2118	21.5215	15.9915	12.974
GO:0006953	7	acute-phase response	33	41	3	3	3	0.99393	0.036835	0.036835	7.32	25419;29199;24614	Crp;Hfe;Orm1	1387830_at;1370772_a_at;1368731_at		34.4221	35.2166	20.2265	13.8155	38.6557	12.1402	20.9737	22.8112	14.599	5.68328	22.7408	4.62488	52.7136	49.603	32.2998	22.1337	56.776	19.8332	1.5	41.52			20.2265;35.2166;47.8233	14.599;22.8112;25.5109	32.2998;76.2381;49.603	3	0	3	25419;29199;24614	1387830_at;1370772_a_at;1368731_at	34.4221	35.2166	13.8155	20.9737
GO:0006954	5	inflammatory response	274	296	8	8	8	0.9142	0.16341	0.25959	2.7	245920;25419;29199;294270;25476;24614;100912108;83619	Cxcl10;Crp;Hfe;RT1-Db1;Lgals9;Orm1;Nupr1;Nfe2l2	1387969_at;1387830_at;1370772_a_at;1370382_at,1370383_s_at;1387027_a_at;1368731_at;1367847_at;1367826_at		23.6371	27.7216	0.324767	17.6208	21.7098	19.198	14.2648	18.5963	0.0408567	10.8866	12.8281	11.7734	3.1563e+06	78.5774	23.1149	8.82662e+06	6.17119e+06	1.14969e+07					0.324767;20.2265;35.2166;4.6979455;36.5565;47.8233;35.7108;8.54018	0.0408567;14.599;22.8112;2.6781043;23.4439;25.5109;22.5936;2.44081	2.5E7;32.2998;76.2381;250023.52665;81.9429;49.603;80.9168;23.1149	8	1	7	245920;25419;29199;294270;25476;24614;83619	1387969_at;1387830_at;1370772_a_at;1370382_at,1370383_s_at;1387027_a_at;1368731_at;1367826_at	21.9123	20.2265	18.2886	13.075
GO:0006955	3	immune response	452	511	14	14	14	0.95789	0.076382	0.12146	2.74	316010;297989;245920;25419;25627;170496;192281;29199;294270;25697;60628;246097;24614;25080	Camp;Ddx58;Cxcl10;Crp;Cma1;Lcn2;Oas1a;Hfe;RT1-Db1;Ctsl;Cxcr4;Fas;Orm1;Apoa4	1393603_at;1391463_at;1387969_at;1387830_at;1387173_at;1387011_at;1371152_a_at;1370772_a_at;1370382_at,1370383_s_at;1370244_at;1389244_x_at;1397221_s_at;1368731_at;1368520_at		16.199	12.1342	0.0158072	17.4206	15.0052	18.3197	10.3606	8.4326	2.85172e-09	10.8238	9.32239	11.1786	3.66074e+06	66.9456	0.117549	9.04241e+06	6.73454e+06	1.14053e+07					30.0616;19.5705;0.324767;20.2265;0.01714575;39.4681;28.5593;35.2166;4.6979455;0.119104;0.235955;0.0158072;47.8233;0.44934	20.2323;14.1871;0.0408567;14.599;2.85172E-9;25.4163;19.4349;22.8112;2.6781043;0.0377096;0.0107916;6.31202E-5;25.5109;0.0892025	57.6531;30.9363;2.5E7;32.2998;0.1175485;92.3515;53.0563;76.2381;250023.52665;4.56418;2.5E7;500000.0;49.603;500000.0	12	3	11	297989;245920;25419;170496;192281;29199;294270;25697;246097;24614;25080	1391463_at;1387969_at;1387830_at;1387011_at;1371152_a_at;1370772_a_at;1370382_at,1370383_s_at;1370244_at;1397221_s_at;1368731_at;1368520_at	17.861	19.5705	17.9052	11.3459
GO:0006956	7	complement activation	31	39	1	1	1	0.8455	0.50684	0.50684	2.56	25419	Crp	1387830_at		20.2265	20.2265	20.2265		20.2265		14.599	14.599	14.599		14.599		32.2998	32.2998	32.2998		32.2998						20.2265	14.599	32.2998	1	0	1	25419	1387830_at	20.2265	20.2265		14.599
GO:0006958	8	complement activation, classical pathway	21	26	1	1	1	0.92143	0.37564	0.37564	3.85	25419	Crp	1387830_at		20.2265	20.2265	20.2265		20.2265		14.599	14.599	14.599		14.599		32.2998	32.2998	32.2998		32.2998						20.2265	14.599	32.2998	1	0	1	25419	1387830_at	20.2265	20.2265		14.599
GO:0006959	4	humoral immune response	102	121	4	4	4	0.93335	0.17256	0.17256	3.31	316010;245920;25419;294270	Camp;Cxcl10;Crp;RT1-Db1	1393603_at;1387969_at;1387830_at;1370382_at,1370383_s_at		13.8277	12.4622	0.324767	13.7861	10.145	14.5254	9.38757	8.63855	0.0408567	9.61154	6.74738	9.98806	6.31253e+06	125041	32.2998	1.24589e+07	1.23154e+07	1.43823e+07					30.0616;0.324767;20.2265;4.6979455	20.2323;0.0408567;14.599;2.6781043	57.6531;2.5E7;32.2998;250023.52665	4	1	3	245920;25419;294270	1387969_at;1387830_at;1370382_at,1370383_s_at	8.4164	4.69795	10.459	5.77265
GO:0006970	4	response to osmotic stress	86	91	1	1	1	0.51207	0.8085	1	1.1	170913	Abcb1a	1370464_at,1370465_at		2.46199	2.46199	2.46199		2.46199		0.077203	0.077203	0.077203		0.077203		10.0651	10.0651	10.0651		10.0651						2.46199	0.077203	10.0651	2	0	1	170913	1370464_at,1370465_at	2.46199	2.46199		0.077203
GO:0006972	5	hyperosmotic response	33	34	1	1	1	0.87623	0.45999	0.45999	2.94	170913	Abcb1a	1370464_at,1370465_at		2.46199	2.46199	2.46199		2.46199		0.077203	0.077203	0.077203		0.077203		10.0651	10.0651	10.0651		10.0651						2.46199	0.077203	10.0651	2	0	1	170913	1370464_at,1370465_at	2.46199	2.46199		0.077203
GO:0006974	5	cellular response to DNA damage stimulus	495	521	4	4	4	0.040084	0.98554	0.088484	0.77	298884;311078;58919;100912108	Gen1;Psmd14;Ccnd1;Nupr1	1384102_at;1386073_at;1371150_at,1371643_at,1383075_at;1367847_at		31.061	34.6959	15.5575	10.5931	29.8577	9.93372	20.1234	21.8749	11.5564	5.94993	19.2973	5.41864	67.9316	78.0898	23.2821	30.5943	64.2766	28.4939					33.6809;39.2949;15.557466666666665;35.7108	21.1562;25.1873;11.556399999999998;22.5936	75.2628;92.2647;23.282066666666665;80.9168	1	5	1	311078	1386073_at	39.2949	39.2949		25.1873
GO:0006979	4	response to oxidative stress	378	393	16	16	16	0.99927	0.0019502	0.0026778	4.07	266766;25419;24314;170496;58819;361659;296271;117514;24565;246097;116686;25426;25080;25303;81707;83619	Rcan1;Crp;Nqo1;Lcn2;Txnrd1;Plekha1;Srxn1;Txnip;Abcc1;Fas;Gsr;Cyp1b1;Apoa4;Abcc2;Mmp14;Nfe2l2	1388686_at;1387830_at;1387599_a_at;1387011_at;1386958_at;1376762_at;1372510_at;1371131_a_at;1371005_at;1397221_s_at;1369061_at;1368990_at;1368520_at;1368497_at;1367860_a_at;1367826_at	296271(0.1277)	21.2123	22.4128	0.0158072	14.6969	18.566	13.5796	13.7451	15.9255	6.31202e-05	9.66904	12.2824	9.36344	1.62505e+06	53.1551	22.2679	6.23564e+06	3.4383e+06	8.79244e+06					0.324769;20.2265;8.72415;39.4681;21.6641;23.1615;28.9693;28.4676;49.0723;0.0158072;28.7171;27.2489;0.44934;16.7895;37.5583;8.54018	0.0517397;14.599;3.19261;25.4163;15.6676;16.1835;19.6546;19.3855;28.7034;6.31202E-5;19.5196;18.7215;0.0892025;12.3882;23.9073;2.44081	2.5E7;32.2998;22.2679;92.3515;34.7079;39.6472;54.2794;52.7858;167.065;500000.0;53.5243;49.2941;500000.0;25.4932;86.4955;23.1149	12	4	12	266766;25419;24314;170496;58819;296271;246097;116686;25426;25080;25303;83619	1388686_at;1387830_at;1387599_a_at;1387011_at;1386958_at;1372510_at;1397221_s_at;1369061_at;1368990_at;1368520_at;1368497_at;1367826_at	16.7615	18.508	13.151	10.9784
GO:0006982	5	response to lipid hydroperoxide	2	2	1	1	1	0.99968	0.035551	0.035551	50	25080	Apoa4	1368520_at		0.44934	0.44934	0.44934		0.44934		0.0892025	0.0892025	0.0892025		0.0892025		500000	500000	500000		500000		0	0.44934	0	0.44934	0.44934	0.0892025	500000	1	0	1	25080	1368520_at	0.44934	0.44934		0.0892025
GO:0006984	5	ER-nucleus signaling pathway	21	21	2	2	2	0.99403	0.053788	0.053788	9.52	288985;83619	Insig2;Nfe2l2	1389377_at,1393690_at;1367826_at		13.6766	13.6766	8.54018	7.26395	13.1631	7.22756	8.04403	8.04403	2.44081	7.92415	7.48393	7.88446	26.4461	26.4461	23.1149	4.71106	26.1131	4.68747	0.5	13.6766			18.81295;8.54018	13.64725;2.44081	29.77735;23.1149	3	0	2	288985;83619	1389377_at,1393690_at;1367826_at	13.6766	13.6766	7.26395	8.04403
GO:0006986	5	response to unfolded protein	35	40	1	1	1	0.83919	0.51571	0.51571	2.5	291671	Hspa9	1389930_at		0.0171458	0.0171458	0.0171458		0.0171458		2.85172e-09	2.85172e-09	2.85172e-09		2.85172e-09		0.117549	0.117549	0.117549		0.117549						0.0171458	2.85172e-09	0.117549	1	0	1	291671	1389930_at	0.0171458	0.0171458		2.85172e-09
GO:0006991	4	response to sterol depletion	9	9	1	1	1	0.98939	0.15036	0.15036	11.11	288985	Insig2	1389377_at,1393690_at		18.813	18.813	18.813		18.813		13.6472	13.6472	13.6472		13.6472		29.7773	29.7773	29.7773		29.7773		0	18.813	0	18.813	18.813	13.6472	29.7773	2	0	1	288985	1389377_at,1393690_at	18.813	18.813		13.6472
GO:0006996	4	organelle organization	1692	1785	20	19	19	0.0055363	0.99713	0.011966	1.06	680860;307395;297783;305419;89843;309187;296750;287603;316313;297096;360481;309957;287534;619558;315430;296654;192129;24913;24162	Eppk1;Ablim3;Mybl1;Pi4k2b;Cxadr;Atl3;Rint1;Tex14;Dst;Snx10;Dnaja3;Mef2a;Fam101b;Fam134b;Amotl1;Gsn;Vmp1;Pla2g16;Acp2	1392012_at;1390255_at;1385132_at;1384950_at;1384816_at;1384797_at,1395973_at,1395980_at;1382797_at;1382487_at;1395274_at;1383585_s_at;1378392_at;1378360_at;1377940_at;1373011_at;1371627_at;1371414_at;1370807_at;1370202_at;1367906_at	316313(-0.1821);619558(0.3826)	20.85	27.523	0.0925913	14.2375	4.85378		13.0122	18.8722	0.0342073	10.2644	0.0995284		1.34215e+06	58.7317	0.778	5.73015e+06	498392						7.07448;0.269704;30.3994;39.7988;22.8164;29.6319;29.2583;4.86357;36.1342;20.0689;31.2133;33.9069;36.8972;32.0491;0.0925913;0.530685;7.25388;6.36787;27.523	0.107778;0.064511;20.4086;24.9151;16.18;19.787300000000002;19.8086;0.107723;23.7496;14.5005;20.8292;21.8155;23.1572;21.2547;0.0342073;0.0822551;1.4702;0.0860943;18.8722	2.5E7;14.6268;58.7317;97.6928;38.0215;60.193999999999996;55.1555;500000.0;77.396;31.9693;61.4029;72.9728;86.0639;64.2574;0.778;21.0222;20.0989;29.194;50.0632	14	7	12	680860;297783;305419;89843;309187;296750;316313;297096;360481;619558;192129;24162	1392012_at;1385132_at;1384950_at;1384816_at;1384797_at,1395973_at,1395980_at;1382797_at;1395274_at;1383585_s_at;1378392_at;1373011_at;1370807_at;1367906_at	26.1018	29.4451	10.2564	16.8236
GO:0007005	5	mitochondrion organization	238	256	3	3	3	0.32209	0.84175	0.63347	1.17	89843;360481;309957	Cxadr;Dnaja3;Mef2a	1384816_at;1378392_at;1378360_at		29.3122	31.2133	22.8164	5.7845	28.0042	6.25355	19.6082	20.8292	16.18	3.00962	18.8931	3.24179	57.4657	61.4029	38.0215	17.8052	53.7508	19.2841					22.8164;31.2133;33.9069	16.18;20.8292;21.8155	38.0215;61.4029;72.9728	2	1	2	89843;360481	1384816_at;1378392_at	27.0148	27.0148	5.9375	18.5046
GO:0007009	5	plasma membrane organization	56	58	2	2	2	0.91424	0.2792	0.2792	3.45	309499;60628	Myof;Cxcr4	1375857_at;1389244_x_at		13.7005	13.7005	0.235955	19.0418	11.9626	18.8825	9.3431	9.3431	0.0107916	13.1979	8.13852	13.0875	1.25e+07	1.25e+07	49.061	1.76776e+07	1.41135e+07	1.75298e+07					27.1651;0.235955	18.6754;0.0107916	49.061;2.5E7	0	2	0
GO:0007010	5	cytoskeleton organization	694	730	8	7	7	0.045356	0.97922	0.08434	0.96	680860;307395;89843;316313;309957;287534;315430	Eppk1;Ablim3;Cxadr;Dst;Mef2a;Fam101b;Amotl1	1392012_at;1390255_at;1384816_at;1395274_at;1378360_at;1377940_at;1371627_at	316313(-0.1821)	19.5988	22.8164	0.0925913	16.826	14.3753	15.2105	12.1584	16.18	0.0342073	11.5704	8.31873	10.8221	3.57147e+06	72.9728	0.778	9.44909e+06	6.46251e+06	1.18222e+07					7.07448;0.269704;22.8164;36.1342;33.9069;36.8972;0.0925913	0.107778;0.064511;16.18;23.7496;21.8155;23.1572;0.0342073	2.5E7;14.6268;38.0215;77.396;72.9728;86.0639;0.778	3	4	3	680860;89843;316313	1392012_at;1384816_at;1395274_at	22.0084	22.8164	14.5467	13.3458
GO:0007015	5	actin filament organization	195	209	3	2	2	0.2723	0.89233	0.59359	0.96	287534;296654	Fam101b;Gsn	1377940_at;1371414_at		18.7139	18.7139	0.530685	25.715	9.31447	22.0128	11.6197	11.6197	0.0822551	16.3165	5.65566	13.9673	53.5431	53.5431	21.0222	45.9914	36.732	39.3699					36.8972;0.530685	23.1572;0.0822551	86.0639;21.0222	0	2	0
GO:0007017	3	microtubule-based process	498	526	2	2	2	0.0036494	0.99934	0.0066179	0.38	689931;316313	Mgarp;Dst	1393627_at;1395274_at	316313(-0.1821)	25.3934	25.3934	14.6526	15.1898	21.5415	14.1794	17.4337	17.4337	11.1178	8.93203	15.1687	8.33789	49.2319	49.2319	21.0678	39.8301	39.1316	37.1806					14.6526;36.1342	11.1178;23.7496	21.0678;77.396	2	0	2	689931;316313	1393627_at;1395274_at	25.3934	25.3934	15.1898	17.4337
GO:0007018	4	microtubule-based movement	199	210	2	2	2	0.26932	0.89388	0.59415	0.95	689931;316313	Mgarp;Dst	1393627_at;1395274_at	316313(-0.1821)	25.3934	25.3934	14.6526	15.1898	21.5415	14.1794	17.4337	17.4337	11.1178	8.93203	15.1687	8.33789	49.2319	49.2319	21.0678	39.8301	39.1316	37.1806					14.6526;36.1342	11.1178;23.7496	21.0678;77.396	2	0	2	689931;316313	1393627_at;1395274_at	25.3934	25.3934	15.1898	17.4337
GO:0007029	5	endoplasmic reticulum organization	42	42	2	2	2	0.96084	0.17356	0.17356	4.76	309187;192129	Atl3;Vmp1	1384797_at,1395973_at,1395980_at;1370807_at		18.4429	18.4429	7.25388	15.8236	14.5562	14.8383	10.6288	10.6288	1.4702	12.9521	7.44738	12.1456	40.1465	40.1465	20.0989	28.3515	33.1826	26.5861					29.6319;7.25388	19.787300000000002;1.4702	60.193999999999996;20.0989	4	0	2	309187;192129	1384797_at,1395973_at,1395980_at;1370807_at	18.4429	18.4429	15.8236	10.6288
GO:0007030	5	Golgi organization	100	100	4	4	4	0.9661	0.10515	0.10515	4	305419;309187;296750;192129	Pi4k2b;Atl3;Rint1;Vmp1	1384950_at;1384797_at,1395973_at,1395980_at;1382797_at;1370807_at		26.4857	29.4451	7.25388	13.7197	25.9814	13.1777	16.4953	19.798	1.4702	10.3031	16.3103	10.0371	58.2853	57.6748	20.0989	31.7521	55.5575	29.729					39.7988;29.6319;29.2583;7.25388	24.9151;19.787300000000002;19.8086;1.4702	97.6928;60.193999999999996;55.1555;20.0989	6	0	4	305419;309187;296750;192129	1384950_at;1384797_at,1395973_at,1395980_at;1382797_at;1370807_at	26.4857	29.4451	13.7197	16.4953
GO:0007031	5	peroxisome organization	22	24	1	1	1	0.93172	0.35258	0.35258	4.17	24913	Pla2g16	1370202_at		6.36787	6.36787	6.36787		6.36787		0.0860943	0.0860943	0.0860943		0.0860943		29.194	29.194	29.194		29.194						6.36787	0.0860943	29.194	0	1	0
GO:0007032	6	endosome organization	41	43	2	2	2	0.95844	0.18	0.18	4.65	305419;297096	Pi4k2b;Snx10	1384950_at;1383585_s_at		29.9338	29.9338	20.0689	13.9511	27.3262	13.4549	19.7078	19.7078	14.5005	7.36423	18.3313	7.10229	64.8311	64.8311	31.9693	46.4735	56.1445	44.8205					39.7988;20.0689	24.9151;14.5005	97.6928;31.9693	2	0	2	305419;297096	1384950_at;1383585_s_at	29.9338	29.9338	13.9511	19.7078
GO:0007033	5	vacuole organization	87	92	1	1	1	0.5063	0.81196	1	1.09	24162	Acp2	1367906_at		27.523	27.523	27.523		27.523		18.8722	18.8722	18.8722		18.8722		50.0632	50.0632	50.0632		50.0632						27.523	18.8722	50.0632	1	0	1	24162	1367906_at	27.523	27.523		18.8722
GO:0007034	5	vacuolar transport	105	112	1	1	1	0.39997	0.86945	0.72568	0.89	117106	Scarb2	1368379_at		17.2256	17.2256	17.2256		17.2256		12.8141	12.8141	12.8141		12.8141		25.8244	25.8244	25.8244		25.8244						17.2256	12.8141	25.8244	1	0	1	117106	1368379_at	17.2256	17.2256		12.8141
GO:0007040	7	lysosome organization	37	39	1	1	1	0.8455	0.50684	0.50684	2.56	24162	Acp2	1367906_at		27.523	27.523	27.523		27.523		18.8722	18.8722	18.8722		18.8722		50.0632	50.0632	50.0632		50.0632						27.523	18.8722	50.0632	1	0	1	24162	1367906_at	27.523	27.523		18.8722
GO:0007041	6	lysosomal transport	81	86	1	1	1	0.5415	0.79023	1	1.16	117106	Scarb2	1368379_at		17.2256	17.2256	17.2256		17.2256		12.8141	12.8141	12.8141		12.8141		25.8244	25.8244	25.8244		25.8244						17.2256	12.8141	25.8244	1	0	1	117106	1368379_at	17.2256	17.2256		12.8141
GO:0007044	6	cell-substrate junction assembly	31	31	1	1	1	0.89384	0.42978	0.42978	3.23	316313	Dst	1395274_at	316313(-0.1821)	36.1342	36.1342	36.1342		36.1342		23.7496	23.7496	23.7496		23.7496		77.396	77.396	77.396		77.396						36.1342	23.7496	77.396	1	0	1	316313	1395274_at	36.1342	36.1342		23.7496
GO:0007049	3	cell cycle	131	144	3	3	3	0.74112	0.47938	0.74557	2.08	297783;60336;58919	Mybl1;Arpp19;Ccnd1	1385132_at;1394318_at;1371150_at,1371643_at,1383075_at		24.4517	27.3981	15.5575	7.84741	24.3069	7.78354	17.0236	19.1059	11.5564	4.77936	16.952	4.75538	43.4762	48.4149	23.2821	18.2335	43.0357	17.992					30.3994;27.3981;15.557466666666665	20.4086;19.1059;11.556399999999998	58.7317;48.4149;23.282066666666665	2	3	2	297783;60336	1385132_at;1394318_at	28.8987	28.8987	2.12224	19.7572
GO:0007050	6	cell cycle arrest	71	76	1	1	1	0.60312	0.74832	1	1.32	29200	Inhba	1369012_at,1383486_at		38.4402	38.4402	38.4402		38.4401		24.1116	24.1116	24.1116		24.1115		53.349	53.349	53.349		53.349						38.4402	24.1116	53.349	0	2	0
GO:0007059	3	chromosome segregation	83	86	1	1	1	0.5415	0.79023	1	1.16	501624	Bex4	1373458_at		31.967	31.967	31.967		31.967		20.834	20.834	20.834		20.834		65.901	65.901	65.901		65.901						31.967	20.834	65.901	0	1	0
GO:0007088	7	regulation of mitotic nuclear division	145	150	4	4	4	0.86727	0.28272	0.34788	2.67	361643;298884;287603;58919	Lcmt1;Gen1;Tex14;Ccnd1	1388747_at;1384102_at;1382487_at;1371150_at,1371643_at,1383075_at		19.3101	19.348	4.86357	12.165	4.86012		12.298	13.964	0.107723	9.02245	0.104821		125034	57.0182	23.2821	249977	500087						23.1385;33.6809;4.86357;15.557466666666665	16.3715;21.1562;0.107723;11.556399999999998	38.7737;75.2628;500000.0;23.282066666666665	0	6	0
GO:0007093	7	mitotic cell cycle checkpoint	87	91	2	2	2	0.77626	0.48793	0.67943	2.2	287603;58919	Tex14;Ccnd1	1382487_at;1371150_at,1371643_at,1383075_at		10.2105	10.2105	4.86357	7.56173	4.86315		5.83206	5.83206	0.107723	8.09544	0.10727		250012	250012	23.2821	353537	500020						4.86357;15.557466666666665	0.107723;11.556399999999998	500000.0;23.282066666666665	0	4	0
GO:0007094	9	mitotic spindle assembly checkpoint	18	18	1	1	1	0.95942	0.27819	0.27819	5.56	287603	Tex14	1382487_at		4.86357	4.86357	4.86357		4.86357		0.107723	0.107723	0.107723		0.107723		500000	500000	500000		500000		0	4.86357			4.86357	0.107723	500000	0	1	0
GO:0007127	7	meiosis I	17	19	1	1	1	0.95517	0.29116	0.29116	5.26	297783	Mybl1	1385132_at		30.3994	30.3994	30.3994		30.3994		20.4086	20.4086	20.4086		20.4086		58.7317	58.7317	58.7317		58.7317		0	30.3994			30.3994	20.4086	58.7317	1	0	1	297783	1385132_at	30.3994	30.3994		20.4086
GO:0007131	8	reciprocal meiotic recombination	15	17	1	1	1	0.96351	0.26499	0.26499	5.88	295160	Mnd1	1391626_at		6.70004	6.70004	6.70004		6.70004		2.2455	2.2455	2.2455		2.2455		16.9955	16.9955	16.9955		16.9955		0	6.70004			6.70004	2.2455	16.9955	1	0	1	295160	1391626_at	6.70004	6.70004		2.2455
GO:0007140	7	male meiotic nuclear division	29	30	2	2	2	0.98382	0.10045	0.10045	6.67	297783;287603	Mybl1;Tex14	1385132_at;1382487_at		17.6315	17.6315	4.86357	18.0566	4.86267		10.2582	10.2582	0.107723	14.3549	0.10701		250029	250029	58.7317	353512	500018		0.5	17.6315			30.3994;4.86357	20.4086;0.107723	58.7317;500000.0	1	1	1	297783	1385132_at	30.3994	30.3994		20.4086
GO:0007141	8	male meiosis I	10	11	1	1	1	0.98417	0.18058	0.18058	9.09	297783	Mybl1	1385132_at		30.3994	30.3994	30.3994		30.3994		20.4086	20.4086	20.4086		20.4086		58.7317	58.7317	58.7317		58.7317		0	30.3994			30.3994	20.4086	58.7317	1	0	1	297783	1385132_at	30.3994	30.3994		20.4086
GO:0007154	3	cell communication	595	625	14	14	14	0.84577	0.23248	0.35412	2.24	170496;89843;306055;29199;170913;171099;25697;246097;64558;56759;81813;64535;24162;83619	Lcn2;Cxadr;Pcdh17;Hfe;Abcb1a;Rasd2;Ctsl;Fas;Fzd4;Rnase4;Klf10;Fgfbp1;Acp2;Nfe2l2	1387011_at;1384816_at;1393454_at;1370772_a_at;1370464_at,1370465_at;1370372_at;1370244_at;1397221_s_at;1369468_at;1368943_at;1368650_at;1368349_at;1367906_at;1367826_at	64558(0.3921)	16.5367	8.89596	0.0158072	15.5756	14.3712	13.2334	10.4585	5.15853	1.15429e-07	10.4001	9.00621	9.07181	1.82147e+06	44.0423	4.56418	6.67257e+06	411737	3.24662e+06					39.4681;22.8164;40.9399;35.2166;2.461988;9.25174;0.119104;0.0158072;0.0781713;7.72749;31.0897;6.26631;27.523;8.54018	25.4163;16.18;25.4137;22.8112;0.077203;5.46159;0.0377096;6.31202E-5;1.15429E-7;4.85547;20.7657;4.08757;18.8722;2.44081	92.3515;38.0215;104.01;76.2381;10.065059999999999;27.386;4.56418;500000.0;2.5E7;17.1691;60.9906;13.9571;50.0632;23.1149	11	4	10	170496;89843;29199;170913;25697;246097;64558;64535;24162;83619	1387011_at;1384816_at;1370772_a_at;1370464_at,1370465_at;1370244_at;1397221_s_at;1369468_at;1368349_at;1367906_at;1367826_at	14.2506	7.40325	15.5046	8.99231
GO:0007155	3	cell adhesion	514	546	12	12	12	0.81707	0.27566	0.41144	2.2	89843;303926;313278;306055;94268;292949;260326;192129;81613;64558;25426;25080	Cxadr;Igsf11;Ptprd;Pcdh17;Efna1;Perp;Gpr56;Vmp1;Ceacam1;Fzd4;Cyp1b1;Apoa4	1384816_at;1376733_at;1376619_at;1393454_at;1372844_at;1389177_at;1371696_at;1370807_at;1374620_at,1382975_at;1369468_at;1368990_at;1368520_at	313278(-0.121);64558(0.3921)	23.6721	26.0192	0.0781713	14.0444	23.6232	12.1739	15.3663	18.141	1.15429e-07	9.39437	15.5912	8.34537	2.12505e+06	60.5834	20.0989	7.20517e+06	500361	3.44618e+06					22.8164;23.5435;37.1251;40.9399;24.7896;31.4104;37.9776;7.25388;30.432450000000003;0.0781713;27.2489;0.44934	16.18;16.6108;23.7079;25.4137;17.5606;20.9301;23.3019;1.4702;20.409799999999997;1.15429E-7;18.7215;0.0892025	38.0215;39.7332;84.495;104.01;41.8713;62.0658;93.5361;20.0989;59.101;2.5E7;49.2941;500000.0	10	3	9	89843;303926;94268;292949;192129;81613;64558;25426;25080	1384816_at;1376733_at;1372844_at;1389177_at;1370807_at;1374620_at,1382975_at;1369468_at;1368990_at;1368520_at	18.6692	23.5435	12.5531	12.4414
GO:0007156	6	homophilic cell adhesion via plasma membrane adhesion molecules	72	82	2	2	2	0.8178	0.43427	0.6599	2.44	306055;81613	Pcdh17;Ceacam1	1393454_at;1374620_at,1382975_at		35.6862	35.6862	30.4324	7.42989	32.1483	5.49277	22.9117	22.9117	20.4098	3.53829	21.2269	2.61579	81.5555	81.5555	59.101	31.7555	66.4347	23.4762					40.9399;30.432450000000003	25.4137;20.409799999999997	104.01;59.101	2	1	1	81613	1374620_at,1382975_at	30.4324	30.4324		20.4098
GO:0007157	6	heterophilic cell-cell adhesion via plasma membrane cell adhesion molecules	35	36	2	2	2	0.97368	0.13588	0.13588	5.56	89843;313278	Cxadr;Ptprd	1384816_at;1376619_at	313278(-0.121)	29.9707	29.9707	22.8164	10.1178	28.4558	9.88835	19.944	19.944	16.18	5.32303	19.1469	5.20233	61.2582	61.2582	38.0215	32.8617	56.3379	32.1166	0.5	29.9707			22.8164;37.1251	16.18;23.7079	38.0215;84.495	1	1	1	89843	1384816_at	22.8164	22.8164		16.18
GO:0007159	5	leukocyte cell-cell adhesion	44	45	1	1	1	0.80701	0.55774	0.55774	2.22	25080	Apoa4	1368520_at		0.44934	0.44934	0.44934		0.44934		0.0892025	0.0892025	0.0892025		0.0892025		500000	500000	500000		500000						0.44934	0.0892025	500000	1	0	1	25080	1368520_at	0.44934	0.44934		0.0892025
GO:0007162	5	negative regulation of cell adhesion	226	237	9	9	9	0.98949	0.027249	0.040416	3.8	29199;294270;81613;25476;116683;64558;29516;25426;81707	Hfe;RT1-Db1;Ceacam1;Lgals9;Efna5;Fzd4;Pde3b;Cyp1b1;Mmp14	1370772_a_at;1370382_at,1370383_s_at;1374620_at,1382975_at;1387027_a_at;1375647_at;1369468_at;1369157_at;1368990_at;1367860_a_at	116683(0.1685);64558(0.3921)	25.1997	27.7022	0.0781713	13.5819	27.0546	10.2702	16.624	19.0667	1.15429e-07	8.92467	18.0912	6.79451	2.80561e+06	76.2381	48.0975	8.32331e+06	774390	4.51911e+06					35.2166;4.6979455;30.432450000000003;36.5565;27.7022;0.0781713;27.3061;27.2489;37.5583	22.8112;2.6781043;20.409799999999997;23.4439;18.5771;1.15429E-7;19.0667;18.7215;23.9073	76.2381;250023.52665;59.101;81.9429;52.381;2.5E7;48.0975;49.2941;86.4955	9	2	7	29199;294270;81613;25476;64558;29516;25426	1370772_a_at;1370382_at,1370383_s_at;1374620_at,1382975_at;1387027_a_at;1369468_at;1369157_at;1368990_at	23.0767	27.3061	14.6355	15.3045
GO:0007163	3	establishment or maintenance of cell polarity	139	147	2	2	2	0.50695	0.74417	1	1.36	316313;315430	Dst;Amotl1	1395274_at;1371627_at	316313(-0.1821)	18.1134	18.1134	0.0925913	25.4853	11.7663	23.8522	11.8919	11.8919	0.0342073	16.7693	7.71552	15.6948	39.087	39.087	0.778	54.1771	25.5942	50.7055					36.1342;0.0925913	23.7496;0.0342073	77.396;0.778	1	1	1	316313	1395274_at	36.1342	36.1342		23.7496
GO:0007165	4	signal transduction	2869	3003	55	55	55	0.60649	0.45474	0.87498	1.83	308097;297989;300474;288985;266766;245920;170496;24539;311169;298884;60336;266735;286896;311021;291132;360481;309957;289264;315806;84422;299269;361659;29454;298652;363239;363143;94268;294400;292949;361846;260326;315430;296654;58919;117514;29199;171099;60628;246097;81613;24536;25476;116683;24684;64558;29516;25690;29200;25426;171129;29547;100912108;81664;83619;80881	Tagap;Ddx58;Adamts15;Insig2;Rcan1;Cxcl10;Lcn2;Lpl;Rtn4rl2;Gen1;Arpp19;Gpr64;Sgpl1;Nmi;Gpld1;Dnaja3;Mef2a;Grem2;Prtg;Gfra3;Ifi27l2b;Plekha1;Gdf11;Ube4b;Raph1;Gnat1;Efna1;Nus1;Perp;Vps26a;Gpr56;Amotl1;Gsn;Ccnd1;Txnip;Hfe;Rasd2;Cxcr4;Fas;Ceacam1;Lepr;Lgals9;Efna5;Prlr;Fzd4;Pde3b;Ahr;Inhba;Cyp1b1;Uggt1;Homer2;Nupr1;Gnai2;Nfe2l2;Serp1	1397958_at;1391463_at;1390931_at;1389377_at,1393690_at;1388686_at;1387969_at;1387011_at;1386965_at;1384389_at;1384102_at;1394318_at;1382967_at;1382843_at;1381875_at;1380833_at;1378392_at;1378360_at;1380799_at;1377804_at;1377680_at;1376845_at;1376762_at;1374706_at;1374507_at,1376862_at;1381748_at;1373587_at;1372844_at;1392522_at;1389177_at;1371705_at;1371696_at;1371627_at;1371414_at;1371150_at,137…	29454(-0.1579);363239(0.4848);294400(0.1633);24536(-0.2274);116683(0.1685);64558(0.3921)	21.2149	24.3346	0.0158072	13.7105	18.5855	14.0327	13.6874	17.0734	1.15429e-07	9.18899	11.8997	9.40542	3.76141e+06	53.349	0.778	8.8848e+06	5.01863e+06	9.97239e+06					35.1155;19.5705;9.32139;18.81295;0.324769;0.324767;39.4681;36.9287;17.484;33.6809;27.3981;22.6633;22.451;0.230619;9.29434;31.2133;33.9069;41.7887;3.2277;24.0979;0.254908;23.1615;1.62109;21.3806;31.5964;34.1415;24.7896;24.3346;31.4104;12.7625;37.9776;0.0925913;0.530685;15.557466666666665;28.4676;35.2166;9.25174;0.235955;0.0158072;30.432450000000003;14.379010000000001;36.5565;27.7022;25.46343333333…	22.1522;14.1871;0.0394699;13.64725;0.0517397;0.0408567;25.4163;23.617;12.8454;21.1562;19.1059;16.3708;15.9613;0.0445238;4.33067;20.8292;21.8155;26.3981;0.104485;16.7011;0.0620163;16.1835;0.105802;15.41795;21.025;22.2926;17.5606;17.0734;20.9301;9.6347;23.3019;0.0342073;0.0822551;11.556399999999998;19.3855;22.8112;5.46159;0.0107916;6.31202E-5;20.409799999999997;5.44549525;23.4439;18.5771;17.2159333…	79.2566;30.9363;2.5E7;29.77735;2.5E7;2.5E7;92.3515;83.6043;26.8043;75.2628;48.4149;36.5739;37.1795;2.5E7;24.0279;61.4029;72.9728;105.191;18.4015;42.0531;14.39;39.6472;2.5E7;34.380399999999995;62.697;71.9494;41.8713;41.6531;62.0658;18.4384;93.5361;0.778;21.0222;23.282066666666665;52.7858;76.2381;27.386;2.5E7;500000.0;59.101;6375024.07585;81.9429;52.381;46.798966666666665;2.5E7;48.0975;2.5E7;53.348…	36	30	33	297989;288985;266766;245920;170496;24539;311169;60336;266735;286896;311021;360481;289264;299269;298652;363239;363143;94268;294400;292949;361846;29199;246097;81613;25476;64558;29516;25690;25426;171129;29547;83619;80881	1391463_at;1389377_at,1393690_at;1388686_at;1387969_at;1387011_at;1386965_at;1384389_at;1394318_at;1382967_at;1382843_at;1381875_at;1378392_at;1380799_at;1376845_at;1374507_at,1376862_at;1381748_at;1373587_at;1372844_at;1392522_at;1389177_at;1371705_at;1370772_a_at;1397221_s_at;1374620_at,1382975_at;1387027_a_at;1369468_at;1369157_at;1369146_a_at;1368990_at;1368953_at;1368872_a_at;1367826_at;1386…	21.7886	24.7896	13.4818	14.4604
GO:0007166	5	cell surface receptor signaling pathway	1292	1336	27	27	27	0.78301	0.28363	0.51252	2.02	300474;245920;170496;311169;266735;286896;311021;291132;289264;361659;94268;294400;292949;260326;58919;117514;29199;60628;246097;81613;24536;116683;24684;64558;29200;29547;81664	Adamts15;Cxcl10;Lcn2;Rtn4rl2;Gpr64;Sgpl1;Nmi;Gpld1;Grem2;Plekha1;Efna1;Nus1;Perp;Gpr56;Ccnd1;Txnip;Hfe;Cxcr4;Fas;Ceacam1;Lepr;Efna5;Prlr;Fzd4;Inhba;Homer2;Gnai2	1390931_at;1387969_at;1387011_at;1384389_at;1382967_at;1382843_at;1381875_at;1380833_at;1380799_at;1376762_at;1372844_at;1392522_at;1389177_at;1371696_at;1371150_at,1371643_at,1383075_at;1371131_a_at;1370772_a_at;1389244_x_at;1397221_s_at;1374620_at,1382975_at;1370604_at,1370605_s_at,1371223_a_at,1388232_a_at;1375647_at;1369493_at,1370384_a_at,1370789_a_at;1369468_at;1369012_at,1383486_at;1368872…	294400(0.1633);24536(-0.2274);116683(0.1685);64558(0.3921)	22.1131	24.3346	0.0158072	13.8901	20.4967	13.6826	14.0652	17.0734	1.15429e-07	9.25909	12.9768	9.03426	4.8843e+06	59.101	23.2821	9.84841e+06	5.67029e+06	1.03759e+07					9.32139;0.324767;39.4681;17.484;22.6633;22.451;0.230619;9.29434;41.7887;23.1615;24.7896;24.3346;31.4104;37.9776;15.557466666666665;28.4676;35.2166;0.235955;0.0158072;30.432450000000003;14.379010000000001;27.7022;25.46343333333333;0.0781713;38.44015;35.8021;40.5617	0.0394699;0.0408567;25.4163;12.8454;16.3708;15.9613;0.0445238;4.33067;26.3981;16.1835;17.5606;17.0734;20.9301;23.3019;11.556399999999998;19.3855;22.8112;0.0107916;6.31202E-5;20.409799999999997;5.44549525;18.5771;17.215933333333336;1.15429E-7;24.11155;18.4899;25.2495	2.5E7;2.5E7;92.3515;26.8043;36.5739;37.1795;2.5E7;24.0279;105.191;39.6472;41.8713;41.6531;62.0658;93.5361;23.282066666666665;52.7858;76.2381;2.5E7;500000.0;59.101;6375024.07585;52.381;46.798966666666665;2.5E7;53.34895;48.0406;101.866	16	20	15	245920;170496;311169;266735;286896;311021;289264;94268;294400;292949;29199;246097;81613;64558;29547	1387969_at;1387011_at;1384389_at;1382967_at;1382843_at;1381875_at;1380799_at;1372844_at;1392522_at;1389177_at;1370772_a_at;1397221_s_at;1374620_at,1382975_at;1369468_at;1368872_a_at	21.766	24.3346	15.03	14.2902
GO:0007167	6	enzyme linked receptor protein signaling pathway	421	432	9	9	9	0.75137	0.37137	0.57952	2.08	286896;291132;361659;94268;294400;117514;29199;116683;29200	Sgpl1;Gpld1;Plekha1;Efna1;Nus1;Txnip;Hfe;Efna5;Inhba	1382843_at;1380833_at;1376762_at;1372844_at;1392522_at;1371131_a_at;1370772_a_at;1375647_at;1369012_at,1383486_at	294400(0.1633);116683(0.1685)	25.9842	24.7896	9.29434	8.31157	23.3336	8.70669	17.3328	17.5606	4.33067	5.63585	15.526	6.49936	46.5703	41.8713	24.0279	14.5304	43.7153	15.408					22.451;9.29434;23.1615;24.7896;24.3346;28.4676;35.2166;27.7022;38.44015	15.9613;4.33067;16.1835;17.5606;17.0734;19.3855;22.8112;18.5771;24.11155	37.1795;24.0279;39.6472;41.8713;41.6531;52.7858;76.2381;52.381;53.34895	4	6	4	286896;94268;294400;29199	1382843_at;1372844_at;1392522_at;1370772_a_at	26.6979	24.5621	5.76863	18.3516
GO:0007169	7	transmembrane receptor protein tyrosine kinase signaling pathway	294	300	7	7	7	0.82807	0.29325	0.50289	2.33	286896;291132;361659;94268;294400;117514;116683	Sgpl1;Gpld1;Plekha1;Efna1;Nus1;Txnip;Efna5	1382843_at;1380833_at;1376762_at;1372844_at;1392522_at;1371131_a_at;1375647_at	294400(0.1633);116683(0.1685)	22.8858	24.3346	9.29434	6.39102	21.5257	7.70335	15.5817	17.0734	4.33067	5.11003	14.438	6.25231	41.3637	41.6531	24.0279	9.77386	39.7235	10.9247					22.451;9.29434;23.1615;24.7896;24.3346;28.4676;27.7022	15.9613;4.33067;16.1835;17.5606;17.0734;19.3855;18.5771	37.1795;24.0279;39.6472;41.8713;41.6531;52.7858;52.381	3	4	3	286896;94268;294400	1382843_at;1372844_at;1392522_at	23.8584	24.3346	1.23989	16.8651
GO:0007171	10	activation of transmembrane receptor protein tyrosine kinase activity	8	8	1	1	1	0.99165	0.13483	0.13483	12.5	24684	Prlr	1369493_at,1370384_a_at,1370789_a_at		25.4634	25.4634	25.4634		25.4634		17.2159	17.2159	17.2159		17.2159		46.799	46.799	46.799		46.799		0	25.4634	0	25.4634	25.4634	17.2159	46.799	0	3	0
GO:0007178	7	transmembrane receptor protein serine/threonine kinase signaling pathway	122	127	2	2	2	0.60091	0.66819	1	1.57	29199;29200	Hfe;Inhba	1370772_a_at;1369012_at,1383486_at		36.8284	36.8284	35.2166	2.27939	35.8918	1.85509	23.4614	23.4614	22.8112	0.919486	23.0836	0.748327	64.7935	64.7935	53.349	16.1851	71.4436	13.1723					35.2166;38.44015	22.8112;24.11155	76.2381;53.34895	1	2	1	29199	1370772_a_at	35.2166	35.2166		22.8112
GO:0007181	7	transforming growth factor beta receptor complex assembly	3	3	1	1	1	0.99905	0.052852	0.052852	33.33	685691	Eid2	1393058_at		25.2334	25.2334	25.2334		25.2334		17.5909	17.5909	17.5909		17.5909		43.9106	43.9106	43.9106		43.9106		0	25.2334	0	25.2334	25.2334	17.5909	43.9106	1	0	1	685691	1393058_at	25.2334	25.2334		17.5909
GO:0007183	7	SMAD protein complex assembly	7	7	1	1	1	0.99366	0.11902	0.11902	14.29	685691	Eid2	1393058_at		25.2334	25.2334	25.2334		25.2334		17.5909	17.5909	17.5909		17.5909		43.9106	43.9106	43.9106		43.9106		0	25.2334	0	25.2334	25.2334	17.5909	43.9106	1	0	1	685691	1393058_at	25.2334	25.2334		17.5909
GO:0007186	5	G-protein coupled receptor signaling pathway	541	582	9	9	9	0.39884	0.72246	0.75063	1.55	245920;60336;266735;363143;260326;60628;64558;29547;81664	Cxcl10;Arpp19;Gpr64;Gnat1;Gpr56;Cxcr4;Fzd4;Homer2;Gnai2	1387969_at;1394318_at;1382967_at;1373587_at;1371696_at;1389244_x_at;1369468_at;1368872_a_at;1367844_at	64558(0.3921)	22.1315	27.3981	0.0781713	17.2888	20.5016	17.3175	13.8736	18.4899	1.15429e-07	10.7244	12.5301	10.4839	8.33338e+06	93.5361	36.5739	1.25e+07	9.27927e+06	1.28106e+07					0.324767;27.3981;22.6633;34.1415;37.9776;0.235955;0.0781713;35.8021;40.5617	0.0408567;19.1059;16.3708;22.2926;23.3019;0.0107916;1.15429E-7;18.4899;25.2495	2.5E7;48.4149;36.5739;71.9494;93.5361;2.5E7;2.5E7;48.0406;101.866	6	3	6	245920;60336;266735;363143;64558;29547	1387969_at;1394318_at;1382967_at;1373587_at;1369468_at;1368872_a_at	20.068	25.0307	16.0965	12.7167
GO:0007187	6	G-protein coupled receptor signaling pathway, coupled to cyclic nucleotide second messenger	160	167	2	2	2	0.42076	0.8048	0.77242	1.2	363143;81664	Gnat1;Gnai2	1373587_at;1367844_at		37.3516	37.3516	34.1415	4.53977	38.3919	4.29475	23.771	23.771	22.2926	2.09084	24.2502	1.978	86.9077	86.9077	71.9494	21.1542	91.7554	20.0125					34.1415;40.5617	22.2926;25.2495	71.9494;101.866	1	1	1	363143	1373587_at	34.1415	34.1415		22.2926
GO:0007188	7	adenylate cyclase-modulating G-protein coupled receptor signaling pathway	144	150	2	2	2	0.49346	0.75419	1	1.33	363143;81664	Gnat1;Gnai2	1373587_at;1367844_at		37.3516	37.3516	34.1415	4.53977	38.3919	4.29475	23.771	23.771	22.2926	2.09084	24.2502	1.978	86.9077	86.9077	71.9494	21.1542	91.7554	20.0125					34.1415;40.5617	22.2926;25.2495	71.9494;101.866	1	1	1	363143	1373587_at	34.1415	34.1415		22.2926
GO:0007189	8	adenylate cyclase-activating G-protein coupled receptor signaling pathway	74	77	1	1	1	0.59681	0.75286	1	1.3	81664	Gnai2	1367844_at		40.5617	40.5617	40.5617		40.5617		25.2495	25.2495	25.2495		25.2495		101.866	101.866	101.866		101.866						40.5617	25.2495	101.866	0	1	0
GO:0007193	8	adenylate cyclase-inhibiting G-protein coupled receptor signaling pathway	59	61	1	1	1	0.70082	0.66934	1	1.64	81664	Gnai2	1367844_at		40.5617	40.5617	40.5617		40.5617		25.2495	25.2495	25.2495		25.2495		101.866	101.866	101.866		101.866						40.5617	25.2495	101.866	0	1	0
GO:0007204	11	positive regulation of cytosolic calcium ion concentration	243	254	2	2	2	0.16211	0.94483	0.33461	0.79	245920;60628	Cxcl10;Cxcr4	1387969_at;1389244_x_at		0.280361	0.280361	0.235955	0.0627996	0.2936	0.0599438	0.0258242	0.0258242	0.0107916	0.0212592	0.0303058	0.0202925	25000000	25000000	25000000	0	25000000	0					0.324767;0.235955	0.0408567;0.0107916	2.5E7;2.5E7	1	1	1	245920	1387969_at	0.324767	0.324767		0.0408567
GO:0007212	6	dopamine receptor signaling pathway	27	28	1	1	1	0.91069	0.39788	0.39788	3.57	60336	Arpp19	1394318_at		27.3981	27.3981	27.3981		27.3981		19.1059	19.1059	19.1059		19.1059		48.4149	48.4149	48.4149		48.4149						27.3981	19.1059	48.4149	1	0	1	60336	1394318_at	27.3981	27.3981		19.1059
GO:0007213	6	G-protein coupled acetylcholine receptor signaling pathway	13	13	1	1	1	0.97807	0.20974	0.20974	7.69	81664	Gnai2	1367844_at		40.5617	40.5617	40.5617		40.5617		25.2495	25.2495	25.2495		25.2495		101.866	101.866	101.866		101.866		0	40.5617			40.5617	25.2495	101.866	0	1	0
GO:0007214	6	gamma-aminobutyric acid signaling pathway	26	26	1	1	1	0.92143	0.37564	0.37564	3.85	81664	Gnai2	1367844_at		40.5617	40.5617	40.5617		40.5617		25.2495	25.2495	25.2495		25.2495		101.866	101.866	101.866		101.866						40.5617	25.2495	101.866	0	1	0
GO:0007215	6	glutamate receptor signaling pathway	47	47	2	2	2	0.94814	0.20609	0.20609	4.26	29547;81664	Homer2;Gnai2	1368872_a_at;1367844_at		38.1819	38.1819	35.8021	3.36555	37.0818	2.98435	21.8697	21.8697	18.4899	4.77976	20.3073	4.23838	74.9533	74.9533	48.0406	38.0603	62.5122	33.7494					35.8021;40.5617	18.4899;25.2495	48.0406;101.866	1	1	1	29547	1368872_a_at	35.8021	35.8021		18.4899
GO:0007216	6	G-protein coupled glutamate receptor signaling pathway	15	15	2	2	2	0.99779	0.028842	0.028842	13.33	29547;81664	Homer2;Gnai2	1368872_a_at;1367844_at		38.1819	38.1819	35.8021	3.36555	37.0818	2.98435	21.8697	21.8697	18.4899	4.77976	20.3073	4.23838	74.9533	74.9533	48.0406	38.0603	62.5122	33.7494	0	35.8021	0.5	38.1819	35.8021;40.5617	18.4899;25.2495	48.0406;101.866	1	1	1	29547	1368872_a_at	35.8021	35.8021		18.4899
GO:0007219	6	Notch signaling pathway	97	99	1	1	1	0.46711	0.8345	1	1.01	292949	Perp	1389177_at		31.4104	31.4104	31.4104		31.4104		20.9301	20.9301	20.9301		20.9301		62.0658	62.0658	62.0658		62.0658						31.4104	20.9301	62.0658	1	0	1	292949	1389177_at	31.4104	31.4104		20.9301
GO:0007223	9	Wnt signaling pathway, calcium modulating pathway	3	3	1	1	1	0.99905	0.052852	0.052852	33.33	64558	Fzd4	1369468_at	64558(0.3921)	0.0781713	0.0781713	0.0781713		0.0781713		1.15429e-07	1.15429e-07	1.15429e-07		1.15429e-07		25000000	25000000	25000000		25000000		0	0.0781713	0	0.0781713	0.0781713	1.15429e-07	25000000	1	0	1	64558	1369468_at	0.0781713	0.0781713		1.15429e-07
GO:0007229	6	integrin-mediated signaling pathway	78	79	1	1	1	0.58428	0.7617	1	1.27	300474	Adamts15	1390931_at		9.32139	9.32139	9.32139		9.32139		0.0394699	0.0394699	0.0394699		0.0394699		25000000	25000000	25000000		25000000						9.32139	0.0394699	25000000	0	1	0
GO:0007259	7	JAK-STAT cascade	18	18	1	1	1	0.95942	0.27819	0.27819	5.56	24684	Prlr	1369493_at,1370384_a_at,1370789_a_at		25.4634	25.4634	25.4634		25.4634		17.2159	17.2159	17.2159		17.2159		46.799	46.799	46.799		46.799		0	25.4634			25.4634	17.2159	46.799	0	3	0
GO:0007264	6	small GTPase mediated signal transduction	236	243	2	2	2	0.18481	0.93487	0.33228	0.82	360481;260326	Dnaja3;Gpr56	1378392_at;1371696_at		34.5954	34.5954	31.2133	4.78308	35.7354	4.50323	22.0656	22.0656	20.8292	1.74846	22.4822	1.64616	77.4695	77.4695	61.4029	22.7216	82.8846	21.3922					31.2133;37.9776	20.8292;23.3019	61.4029;93.5361	1	1	1	360481	1378392_at	31.2133	31.2133		20.8292
GO:0007265	7	Ras protein signal transduction	192	195	1	1	1	0.13175	0.97147	0.27045	0.51	260326	Gpr56	1371696_at		37.9776	37.9776	37.9776		37.9776		23.3019	23.3019	23.3019		23.3019		93.5361	93.5361	93.5361		93.5361						37.9776	23.3019	93.5361	0	1	0
GO:0007266	8	Rho protein signal transduction	66	68	1	1	1	0.65464	0.70887	1	1.47	260326	Gpr56	1371696_at		37.9776	37.9776	37.9776		37.9776		23.3019	23.3019	23.3019		23.3019		93.5361	93.5361	93.5361		93.5361						37.9776	23.3019	93.5361	0	1	0
GO:0007267	3	cell-cell signaling	327	347	4	4	4	0.24994	0.87349	0.53469	1.15	306055;171099;64535;24162	Pcdh17;Rasd2;Fgfbp1;Acp2	1393454_at;1370372_at;1368349_at;1367906_at		20.9952	18.3874	6.26631	16.2814	11.8091	10.5969	13.4588	12.1669	4.08757	10.3923	7.40965	6.93882	48.8541	38.7246	13.9571	39.675	29.5994	23.9927					40.9399;9.25174;6.26631;27.523	25.4137;5.46159;4.08757;18.8722	104.01;27.386;13.9571;50.0632	2	2	2	64535;24162	1368349_at;1367906_at	16.8947	16.8947	15.0307	11.4799
GO:0007268	7	chemical synaptic transmission	218	222	2	2	2	0.23558	0.91098	0.44472	0.9	171099;24162	Rasd2;Acp2	1370372_at;1367906_at		18.3874	18.3874	9.25174	12.9197	11.9731	9.1996	12.1669	12.1669	5.46159	9.48273	7.45896	6.75226	38.7246	38.7246	27.386	16.0352	30.7635	11.418					9.25174;27.523	5.46159;18.8722	27.386;50.0632	1	1	1	24162	1367906_at	27.523	27.523		18.8722
GO:0007272	3	ensheathment of neurons	76	76	1	1	1	0.60312	0.74832	1	1.32	362911	Mal2	1372755_at		28.3947	28.3947	28.3947		28.3947		19.3462	19.3462	19.3462		19.3462		52.5715	52.5715	52.5715		52.5715						28.3947	19.3462	52.5715	1	0	1	362911	1372755_at	28.3947	28.3947		19.3462
GO:0007275	3	multicellular organism development	496	531	6	6	6	0.15509	0.91905	0.31421	1.13	315806;25697;246097;24311;25481;80881	Prtg;Ctsl;Fas;Ddc;Mmp11;Serp1	1377804_at;1370244_at;1397221_s_at;1368064_a_at;1367858_at;1386900_at		7.64169	1.79666	0.0158072	12.7034	7.43538	13.0244	3.61947	0.0581748	6.31202e-05	8.73922	3.87079	8.96252	4.25002e+06	48.7546	4.56418	1.01673e+07	5.26509e+06	1.11198e+07					3.2277;0.119104;0.0158072;9.66871;0.365629;32.4532	0.104485;0.0377096;6.31202E-5;0.0550111;0.0613385;21.4582	18.4015;4.56418;500000.0;31.8289;2.5E7;65.6803	4	2	4	25697;246097;24311;80881	1370244_at;1397221_s_at;1368064_a_at;1386900_at	10.5642	4.89391	15.2785	5.38775
GO:0007276	4	gamete generation	304	331	6	6	6	0.61674	0.54747	0.83521	1.81	297783;286896;361659;25697;246097;116686	Mybl1;Sgpl1;Plekha1;Ctsl;Fas;Gsr	1385132_at;1382843_at;1376762_at;1370244_at;1397221_s_at;1369061_at		17.4773	22.8062	0.0158072	13.8316	18.0936	13.366	12.0185	16.0724	6.31202e-05	9.46082	12.4209	9.13957	83365.6	46.5857	4.56418	204108	40626.8	149584					30.3994;22.451;23.1615;0.119104;0.0158072;28.7171	20.4086;15.9613;16.1835;0.0377096;6.31202E-5;19.5196	58.7317;37.1795;39.6472;4.56418;500000.0;53.5243	5	1	5	297783;286896;25697;246097;116686	1385132_at;1382843_at;1370244_at;1397221_s_at;1369061_at	16.3405	22.451	15.1476	11.1855
GO:0007281	4	germ cell development	110	118	1	1	1	0.37152	0.883	0.72672	0.85	60628	Cxcr4	1389244_x_at		0.235955	0.235955	0.235955		0.235955		0.0107916	0.0107916	0.0107916		0.0107916		25000000	25000000	25000000		25000000						0.235955	0.0107916	25000000	0	1	0
GO:0007283	6	spermatogenesis	284	307	6	6	6	0.68676	0.47397	0.82554	1.95	297783;286896;361659;25697;246097;116686	Mybl1;Sgpl1;Plekha1;Ctsl;Fas;Gsr	1385132_at;1382843_at;1376762_at;1370244_at;1397221_s_at;1369061_at		17.4773	22.8062	0.0158072	13.8316	18.0936	13.366	12.0185	16.0724	6.31202e-05	9.46082	12.4209	9.13957	83365.6	46.5857	4.56418	204108	40626.8	149584					30.3994;22.451;23.1615;0.119104;0.0158072;28.7171	20.4086;15.9613;16.1835;0.0377096;6.31202E-5;19.5196	58.7317;37.1795;39.6472;4.56418;500000.0;53.5243	5	1	5	297783;286896;25697;246097;116686	1385132_at;1382843_at;1370244_at;1397221_s_at;1369061_at	16.3405	22.451	15.1476	11.1855
GO:0007346	6	regulation of mitotic cell cycle	453	472	7	7	7	0.38471	0.74756	0.72526	1.48	361643;298884;296750;287603;501624;58919;24296	Lcmt1;Gen1;Rint1;Tex14;Bex4;Ccnd1;Cyp1a1	1388747_at;1384102_at;1382797_at;1382487_at;1373458_at;1371150_at,1371643_at,1383075_at;1370269_at		19.801	23.1385	0.140946	13.3473	4.85605		12.8408	16.3715	0.0512492	9.32208	0.101433		71467.4	55.1555	13.316	188965	500199						23.1385;33.6809;29.2583;4.86357;31.967;15.557466666666665;0.140946	16.3715;21.1562;19.8086;0.107723;20.834;11.556399999999998;0.0512492	38.7737;75.2628;55.1555;500000.0;65.901;23.282066666666665;13.316	2	7	2	296750;24296	1382797_at;1370269_at	14.6996	14.6996	20.5891	9.92992
GO:0007368	6	determination of left/right symmetry	62	62	1	1	1	0.69418	0.6753	1	1.61	116548	Pcsk5	1392773_at	116548(-0.2018)	24.5208	24.5208	24.5208		24.5208		17.1812	17.1812	17.1812		17.1812		42.1138	42.1138	42.1138		42.1138						24.5208	17.1812	42.1138	1	0	1	116548	1392773_at	24.5208	24.5208		17.1812
GO:0007369	5	gastrulation	45	51	2	2	2	0.93672	0.23254	0.23254	3.92	58819;83472	Txnrd1;Ugdh	1386958_at;1367938_at		20.998	20.998	20.3319	0.942008	20.4444	0.52394	15.2332	15.2332	14.7989	0.614264	14.8723	0.34165	33.365	33.365	32.0222	1.89908	32.2491	1.05626					21.6641;20.3319	15.6676;14.7989	34.7079;32.0222	2	0	2	58819;83472	1386958_at;1367938_at	20.998	20.998	0.942008	15.2332
GO:0007389	3	pattern specification process	309	315	5	5	5	0.50109	0.67065	1	1.59	406164;116548;289264;29454;260326	Pbx2;Pcsk5;Grem2;Gdf11;Gpr56	1389432_at;1392773_at;1380799_at;1374706_at;1371696_at	116548(-0.2018);29454(-0.1579)	23.5261	24.5208	1.62109	17.0479	18.9262	17.341	15.1673	17.1812	0.105802	10.7601	12.0587	11.4099	5.00005e+06	93.5361	16.903	1.11803e+07	9.42723e+06	1.35465e+07					11.7221;24.5208;41.7887;1.62109;37.9776	8.8494;17.1812;26.3981;0.105802;23.3019	16.903;42.1138;105.191;2.5E7;93.5361	2	3	2	116548;289264	1392773_at;1380799_at	33.1547	33.1547	12.2102	21.7897
GO:0007399	5	nervous system development	167	171	2	2	2	0.40466	0.81529	0.77264	1.17	84422;286910	Gfra3;Smim3	1377680_at;1370408_at		22.9609	22.9609	21.8239	1.60796	23.2368	1.55989	16.0108	16.0108	15.3204	0.976302	16.1783	0.947113	39.4276	39.4276	36.8022	3.71295	40.0648	3.60194					24.0979;21.8239	16.7011;15.3204	42.0531;36.8022	0	2	0
GO:0007409	8	axonogenesis	117	122	2	2	2	0.62521	0.64657	1	1.64	308843;316313	Tsku;Dst	1383315_at;1395274_at	316313(-0.1821)	21.6092	21.6092	7.08411	20.5415	15.3759	18.5539	11.9194	11.9194	0.0891169	16.7305	6.84251	15.1116	52.7501	52.7501	28.1042	34.8546	42.1735	31.4819					7.08411;36.1342	0.0891169;23.7496	28.1042;77.396	2	0	2	308843;316313	1383315_at;1395274_at	21.6092	21.6092	20.5415	11.9194
GO:0007411	5	axon guidance	143	145	6	5	5	0.95351	0.11972	0.19113	3.45	84422;94268;60628;116683;29686	Gfra3;Efna1;Cxcr4;Efna5;Scn1b	1377680_at;1372844_at;1389244_x_at;1375647_at;1387010_s_at	116683(0.1685)	15.4228	24.0979	0.235955	13.9057	15.7531	13.2138	10.5813	16.7011	0.0107916	9.65129	10.9634	9.32074	5.10003e+06	52.381	41.8713	1.11265e+07	7.24582e+06	1.26334e+07					24.0979;24.7896;0.235955;27.7022;0.288393	16.7011;17.5606;0.0107916;18.5771;0.057104	42.0531;41.8713;2.5E7;52.381;500000.0	1	4	1	94268	1372844_at	24.7896	24.7896		17.5606
GO:0007413	7	axonal fasciculation	22	22	1	1	1	0.94151	0.32867	0.32867	4.55	116683	Efna5	1375647_at	116683(0.1685)	27.7022	27.7022	27.7022		27.7022		18.5771	18.5771	18.5771		18.5771		52.381	52.381	52.381		52.381						27.7022	18.5771	52.381	0	1	0
GO:0007417	5	central nervous system development	91	92	1	1	1	0.5063	0.81196	1	1.09	116683	Efna5	1375647_at	116683(0.1685)	27.7022	27.7022	27.7022		27.7022		18.5771	18.5771	18.5771		18.5771		52.381	52.381	52.381		52.381						27.7022	18.5771	52.381	0	1	0
GO:0007420	5	brain development	290	299	4	4	4	0.37469	0.7882	0.8234	1.34	260326;170913;60628;116683	Gpr56;Abcb1a;Cxcr4;Efna5	1371696_at;1370464_at,1370465_at;1389244_x_at;1375647_at	116683(0.1685)	17.0944	15.0821	0.235955	18.6811	12.8418	19.1182	10.4917	9.32715	0.0107916	12.2173	7.39006	12.2514	6.25004e+06	72.9586	10.0651	1.25e+07	7.70002e+06	1.33271e+07					37.9776;2.461988;0.235955;27.7022	23.3019;0.077203;0.0107916;18.5771	93.5361;10.065059999999999;2.5E7;52.381	2	3	1	170913	1370464_at,1370465_at	2.46199	2.46199		0.077203
GO:0007423	5	sensory organ development	136	140	4	4	4	0.89264	0.24321	0.32146	2.86	308843;680102;24296;25690	Tsku;Mab21l2;Cyp1a1;Ahr	1383315_at;1378988_at;1370269_at;1369146_a_at		3.09777	2.58301	0.140946	3.36388	1.87085	3.21637	0.0903846	0.0766221	0.0512492	0.0471389	0.067126	0.0196413	6.37501e+06	250014	13.316	1.24189e+07	1.21773e+07	1.44213e+07					7.08411;4.67865;0.140946;0.487373	0.0891169;0.157045;0.0512492;0.0641274	28.1042;500000.0;13.316;2.5E7	4	0	4	308843;680102;24296;25690	1383315_at;1378988_at;1370269_at;1369146_a_at	3.09777	2.58301	3.36388	0.0903846
GO:0007507	5	heart development	269	275	4	4	4	0.44915	0.7309	1	1.45	116548;89843;309957;309544	Pcsk5;Cxadr;Mef2a;Rbm20	1392773_at;1384816_at;1378360_at;1391810_at	116548(-0.2018)	27.0027	25.6437	22.8164	4.87882	26.2738	4.05156	18.4078	17.8179	16.18	2.45508	18.0655	2.05464	50.2679	45.0386	38.0215	15.6768	47.7075	12.9046					24.5208;22.8164;33.9069;26.7666	17.1812;16.18;21.8155;18.4547	42.1138;38.0215;72.9728;47.9633	3	1	3	116548;89843;309544	1392773_at;1384816_at;1391810_at	24.7013	24.5208	1.98127	17.272
GO:0007519	7	skeletal muscle tissue development	68	71	1	1	1	0.63513	0.72434	1	1.41	266766	Rcan1	1388686_at		0.324769	0.324769	0.324769		0.324769		0.0517397	0.0517397	0.0517397		0.0517397		25000000	25000000	25000000		25000000						0.324769	0.0517397	25000000	1	0	1	266766	1388686_at	0.324769	0.324769		0.0517397
GO:0007520	5	myoblast fusion	19	20	2	2	2	0.99482	0.049234	0.049234	10	679806;309499	Fer1l5;Myof	1396729_at;1375857_at		32.9849	32.9849	27.1651	8.23044	32.5457	8.20697	22.0031	22.0031	18.6754	4.70601	21.7519	4.69259	68.4039	68.4039	49.061	27.355	66.9441	27.277	0	27.1651	1	38.8047	38.8047;27.1651	25.3307;18.6754	87.7468;49.061	1	1	1	679806	1396729_at	38.8047	38.8047		25.3307
GO:0007528	5	neuromuscular junction development	40	40	1	1	1	0.83919	0.51571	0.51571	2.5	360481	Dnaja3	1378392_at		31.2133	31.2133	31.2133		31.2133		20.8292	20.8292	20.8292		20.8292		61.4029	61.4029	61.4029		61.4029						31.2133	20.8292	61.4029	1	0	1	360481	1378392_at	31.2133	31.2133		20.8292
GO:0007565	4	female pregnancy	127	129	7	7	7	0.99775	0.0085863	0.0085863	5.43	116548;29199;171352;24536;25476;25303;24484	Pcsk5;Hfe;Cyp3a9;Lepr;Lgals9;Abcc2;Igfbp3	1392773_at;1370772_a_at;1370387_at;1370604_at,1370605_s_at,1371223_a_at,1388232_a_at;1387027_a_at;1368497_at;1367652_at	116548(-0.2018);24536(-0.2274)	27.1272	25.9004	14.379	9.31308	26.8346	9.51745	17.4687	17.9697	5.4455	6.65829	16.8944	7.35442	910769	76.2381	25.4932	2.40951e+06	1.39447e+06	2.84647e+06	5.5	36.5421			24.5208;35.2166;25.9004;14.379010000000001;36.5565;16.7895;36.5276	17.1812;22.8112;17.9697;5.44549525;23.4439;12.3882;23.0409	42.1138;76.2381;45.6414;6375024.07585;81.9429;25.4932;84.1046	5	5	5	116548;29199;171352;25476;25303	1392773_at;1370772_a_at;1370387_at;1387027_a_at;1368497_at	27.7968	25.9004	8.17427	18.7588
GO:0007566	3	embryo implantation	44	46	2	2	2	0.95082	0.19952	0.19952	4.35	116548;192129	Pcsk5;Vmp1	1392773_at;1370807_at	116548(-0.2018)	15.8873	15.8873	7.25388	12.2096	17.8859	11.8779	9.3257	9.3257	1.4702	11.1094	11.1442	10.8076	31.1063	31.1063	20.0989	15.5669	33.6545	15.144					24.5208;7.25388	17.1812;1.4702	42.1138;20.0989	2	0	2	116548;192129	1392773_at;1370807_at	15.8873	15.8873	12.2096	9.3257
GO:0007568	3	aging	373	388	17	17	17	0.99978	0.00063402	0.00063402	4.38	25419;24314;25642;360481;299269;296654;81806;24296;25697;246097;24536;116686;24311;83619;64045;80881;24484	Crp;Nqo1;Cyp3a23/3a1;Dnaja3;Ifi27l2b;Gsn;Serpina7;Cyp1a1;Ctsl;Fas;Lepr;Gsr;Ddc;Nfe2l2;Glrx;Serp1;Igfbp3	1387830_at;1387599_a_at;1387118_at;1378392_at;1376845_at;1371414_at;1371143_at;1370269_at;1370244_at;1397221_s_at;1370604_at,1370605_s_at,1371223_a_at,1388232_a_at;1369061_at;1368064_a_at;1367826_at;1367705_at,1386908_at;1386900_at;1367652_at	24536(-0.2274)	14.2996	9.66871	0.0158072	13.6618	13.4699	14.7599	8.39182	3.19261	6.31202e-05	9.51761	8.00173	9.92181	404445	31.8289	4.56418	1.54334e+06	580027	1.86818e+06					20.2265;8.72415;1.75171;31.2133;0.254908;0.530685;34.2065;0.140946;0.119104;0.0158072;14.379010000000001;28.7171;9.66871;8.54018;15.623975;32.4532;36.5276	14.599;3.19261;0.0435876;20.8292;0.0620163;0.0822551;22.0522;0.0512492;0.0377096;6.31202E-5;5.44549525;19.5196;0.0550111;2.44081;9.751014999999999;21.4582;23.0409	32.2998;22.2679;14.034;61.4029;14.39;21.0222;73.6665;13.316;4.56418;500000.0;6375024.07585;53.5243;31.8289;23.1149;29.54275;65.6803;84.1046	14	7	13	25419;24314;25642;360481;299269;24296;25697;246097;116686;24311;83619;64045;80881	1387830_at;1387599_a_at;1387118_at;1378392_at;1376845_at;1370269_at;1370244_at;1397221_s_at;1369061_at;1368064_a_at;1367826_at;1367705_at,1386908_at;1386900_at	12.1115	8.72415	12.3966	7.08001
GO:0007569	4	cell aging	62	66	1	1	1	0.66775	0.69808	1	1.52	360481	Dnaja3	1378392_at		31.2133	31.2133	31.2133		31.2133		20.8292	20.8292	20.8292		20.8292		61.4029	61.4029	61.4029		61.4029						31.2133	20.8292	61.4029	1	0	1	360481	1378392_at	31.2133	31.2133		20.8292
GO:0007584	4	response to nutrient	327	340	16	16	16	0.99986	0.00042278	0.00042278	4.71	245920;24314;25642;296654;58919;81806;291671;170913;24296;24536;116686;25426;24614;24651;29441;64045	Cxcl10;Nqo1;Cyp3a23/3a1;Gsn;Ccnd1;Serpina7;Hspa9;Abcb1a;Cyp1a1;Lepr;Gsr;Cyp1b1;Orm1;Pklr;Por;Glrx	1387969_at;1387599_a_at;1387118_at;1371414_at;1371150_at,1371643_at,1383075_at;1371143_at;1389930_at;1370464_at,1370465_at;1370269_at;1370604_at,1370605_s_at,1371223_a_at,1388232_a_at;1369061_at;1368990_at;1368731_at;1368651_at,1387263_at;1368213_at,1387109_at;1367705_at,1386908_at	24536(-0.2274)	14.7521	14.9393	0.0171458	14.3558	15.8317	15.3646	8.82834	7.23623	2.85172e-09	9.06793	9.58089	9.66511	1.96097e+06	30.008	0.117549	6.3462e+06	3.63211e+06	8.52397e+06					0.324767;8.72415;1.75171;0.530685;15.557466666666665;34.2065;0.01714575;2.461988;0.140946;14.379010000000001;28.7171;27.2489;47.8233;23.027;15.499569999999999;15.623975	0.0408567;3.19261;0.0435876;0.0822551;11.556399999999998;22.0522;2.85172E-9;0.077203;0.0512492;5.44549525;19.5196;18.7215;25.5109;16.181649999999998;9.02697;9.751014999999999	2.5E7;22.2679;14.034;21.0222;23.282066666666665;73.6665;0.1175485;10.065059999999999;13.316;6375024.07585;53.5243;49.2941;49.603;39.02565;30.4732;29.54275	14	11	11	245920;24314;25642;291671;170913;24296;116686;25426;24614;29441;64045	1387969_at;1387599_a_at;1387118_at;1389930_at;1370464_at,1370465_at;1370269_at;1369061_at;1368990_at;1368731_at;1368213_at,1387109_at;1367705_at,1386908_at	13.4849	8.72415	15.5682	7.81232
GO:0007589	5	body fluid secretion	84	86	4	3	3	0.93129	0.20041	0.20041	3.49	58919;170913;24684	Ccnd1;Abcb1a;Prlr	1371150_at,1371643_at,1383075_at;1370464_at,1370465_at;1369493_at,1370384_a_at,1370789_a_at		14.4943	15.5575	2.46199	11.5375	12.2725	11.6619	9.61651	11.5564	0.077203	8.73249	7.90136	8.95619	26.7154	23.2821	10.0651	18.6061	23.434	18.1467					15.557466666666665;2.461988;25.46343333333333	11.556399999999998;0.077203;17.215933333333336	23.282066666666665;10.065059999999999;46.798966666666665	2	6	1	170913	1370464_at,1370465_at	2.46199	2.46199		0.077203
GO:0007595	6	lactation	57	59	3	3	3	0.97873	0.089213	0.089213	5.08	58919;170913;24684	Ccnd1;Abcb1a;Prlr	1371150_at,1371643_at,1383075_at;1370464_at,1370465_at;1369493_at,1370384_a_at,1370789_a_at		14.4943	15.5575	2.46199	11.5375	12.2725	11.6619	9.61651	11.5564	0.077203	8.73249	7.90136	8.95619	26.7154	23.2821	10.0651	18.6061	23.434	18.1467	1.5	20.5104			15.557466666666665;2.461988;25.46343333333333	11.556399999999998;0.077203;17.215933333333336	23.282066666666665;10.065059999999999;46.798966666666665	2	6	1	170913	1370464_at,1370465_at	2.46199	2.46199		0.077203
GO:0007596	5	blood coagulation	50	55	1	1	1	0.74082	0.63122	1	1.82	81750	Pros1	1371037_at		23.6793	23.6793	23.6793		23.6793		16.6907	16.6907	16.6907		16.6907		40.0585	40.0585	40.0585		40.0585						23.6793	16.6907	40.0585	1	0	1	81750	1371037_at	23.6793	23.6793		16.6907
GO:0007599	5	hemostasis	52	57	1	1	1	0.72747	0.64439	1	1.75	81750	Pros1	1371037_at		23.6793	23.6793	23.6793		23.6793		16.6907	16.6907	16.6907		16.6907		40.0585	40.0585	40.0585		40.0585						23.6793	16.6907	40.0585	1	0	1	81750	1371037_at	23.6793	23.6793		16.6907
GO:0007600	5	sensory perception	318	330	7	7	7	0.75841	0.38032	0.67054	2.12	24423;363143;619558;171352;63867;64558;29547	Gstm1;Gnat1;Fam134b;Cyp3a9;Ugt2a1;Fzd4;Homer2	1386985_at;1373587_at;1373011_at;1370387_at;1369850_at;1369468_at;1368872_a_at	619558(0.3826);64558(0.3921)	21.9425	25.9004	0.0781713	14.2159	20.711	14.4444	13.8103	17.9697	1.15429e-07	9.08669	12.0095	8.77719	3.57147e+06	48.0406	14.844	9.44909e+06	910397	5.05819e+06					20.1987;34.1415;32.0491;25.9004;5.4276;0.0781713;35.8021	14.5817;22.2926;21.2547;17.9697;2.0834;1.15429E-7;18.4899	32.2415;71.9494;64.2574;45.6414;14.844;2.5E7;48.0406	7	0	7	24423;363143;619558;171352;63867;64558;29547	1386985_at;1373587_at;1373011_at;1370387_at;1369850_at;1369468_at;1368872_a_at	21.9425	25.9004	14.2159	13.8103
GO:0007601	7	visual perception	93	94	1	1	1	0.4949	0.8187	1	1.06	363143	Gnat1	1373587_at		34.1415	34.1415	34.1415		34.1415		22.2926	22.2926	22.2926		22.2926		71.9494	71.9494	71.9494		71.9494						34.1415	22.2926	71.9494	1	0	1	363143	1373587_at	34.1415	34.1415		22.2926
GO:0007602	5	phototransduction	21	21	1	1	1	0.94621	0.31639	0.31639	4.76	363143	Gnat1	1373587_at		34.1415	34.1415	34.1415		34.1415		22.2926	22.2926	22.2926		22.2926		71.9494	71.9494	71.9494		71.9494						34.1415	22.2926	71.9494	1	0	1	363143	1373587_at	34.1415	34.1415		22.2926
GO:0007603	6	phototransduction, visible light	2	2	1	1	1	0.99968	0.035551	0.035551	50	363143	Gnat1	1373587_at		34.1415	34.1415	34.1415		34.1415		22.2926	22.2926	22.2926		22.2926		71.9494	71.9494	71.9494		71.9494		0	34.1415	0	34.1415	34.1415	22.2926	71.9494	1	0	1	363143	1373587_at	34.1415	34.1415		22.2926
GO:0007605	7	sensory perception of sound	94	97	2	2	2	0.74761	0.5219	0.69355	2.06	64558;29547	Fzd4;Homer2	1369468_at;1368872_a_at	64558(0.3921)	17.9401	17.9401	0.0781713	25.2606	31.5657	16.3336	9.24495	9.24495	1.15429e-07	13.0743	16.2972	8.4539	1.25e+07	1.25e+07	48.0406	1.76776e+07	2.96471e+06	1.14304e+07					0.0781713;35.8021	1.15429E-7;18.4899	2.5E7;48.0406	2	0	2	64558;29547	1369468_at;1368872_a_at	17.9401	17.9401	25.2606	9.24495
GO:0007606	6	sensory perception of chemical stimulus	59	67	4	4	4	0.99304	0.032098	0.032098	5.97	24423;363143;171352;63867	Gstm1;Gnat1;Cyp3a9;Ugt2a1	1386985_at;1373587_at;1370387_at;1369850_at		21.417	23.0495	5.4276	12.099	13.43	11.3449	14.2318	16.2757	2.0834	8.69204	8.40417	8.65242	41.1691	38.9415	14.844	24.0842	26.7256	19.5738	2.5	30.0209			20.1987;34.1415;25.9004;5.4276	14.5817;22.2926;17.9697;2.0834	32.2415;71.9494;45.6414;14.844	4	0	4	24423;363143;171352;63867	1386985_at;1373587_at;1370387_at;1369850_at	21.417	23.0495	12.099	14.2318
GO:0007608	7	sensory perception of smell	32	38	3	3	3	0.99539	0.030304	0.030304	7.89	24423;171352;63867	Gstm1;Cyp3a9;Ugt2a1	1386985_at;1370387_at;1369850_at		17.1756	20.1987	5.4276	10.5659	11.5173	9.65697	11.5449	14.5817	2.0834	8.3672	7.1216	7.92548	30.909	32.2415	14.844	15.4419	22.5493	12.7029	0.5	12.8132			20.1987;25.9004;5.4276	14.5817;17.9697;2.0834	32.2415;45.6414;14.844	3	0	3	24423;171352;63867	1386985_at;1370387_at;1369850_at	17.1756	20.1987	10.5659	11.5449
GO:0007610	2	behavior	573	589	8	7	7	0.1649	0.90893	0.33809	1.19	266766;81661;305888;306055;171099;24536;29547	Rcan1;Gmfb;Zfhx2;Pcdh17;Rasd2;Lepr;Homer2	1388686_at;1387663_at;1390368_at;1393454_at;1370372_at;1370604_at,1370605_s_at,1371223_a_at,1388232_a_at;1368872_a_at	81661(-0.1388);305888(-0.1592);24536(-0.2274)	15.84	10.1263	0.056018	16.3122	13.558	13.8183	7.8529	5.4455	2.77822e-07	10.1288	6.27467	7.84585	8.05361e+06	104.01	27.386	1.18083e+07	7.42444e+06	1.14808e+07					0.324769;10.1263;0.056018;40.9399;9.25174;14.379010000000001;35.8021	0.0517397;0.107863;2.77822E-7;25.4137;5.46159;5.44549525;18.4899	2.5E7;36.8047;2.5E7;104.01;27.386;6375024.07585;48.0406	3	7	3	266766;81661;29547	1388686_at;1387663_at;1368872_a_at	15.4177	10.1263	18.321	6.2165
GO:0007611	5	learning or memory	271	277	2	2	2	0.12229	0.96118	0.24813	0.72	266766;81661	Rcan1;Gmfb	1388686_at;1387663_at	81661(-0.1388)	5.22553	5.22553	0.324769	6.93073	4.27355	6.79871	0.0798013	0.0798013	0.0517397	0.0396852	0.0743503	0.0389292	1.25e+07	1.25e+07	36.8047	1.76776e+07	1.49282e+07	1.73409e+07					0.324769;10.1263	0.0517397;0.107863	2.5E7;36.8047	2	0	2	266766;81661	1388686_at;1387663_at	5.22553	5.22553	6.93073	0.0798013
GO:0007612	6	learning	154	159	1	1	1	0.21775	0.94475	0.53681	0.63	81661	Gmfb	1387663_at	81661(-0.1388)	10.1263	10.1263	10.1263		10.1263		0.107863	0.107863	0.107863		0.107863		36.8047	36.8047	36.8047		36.8047						10.1263	0.107863	36.8047	1	0	1	81661	1387663_at	10.1263	10.1263		0.107863
GO:0007613	6	memory	138	140	1	1	1	0.28057	0.92175	0.52378	0.71	266766	Rcan1	1388686_at		0.324769	0.324769	0.324769		0.324769		0.0517397	0.0517397	0.0517397		0.0517397		25000000	25000000	25000000		25000000						0.324769	0.0517397	25000000	1	0	1	266766	1388686_at	0.324769	0.324769		0.0517397
GO:0007614	7	short-term memory	12	12	1	1	1	0.98122	0.19529	0.19529	8.33	266766	Rcan1	1388686_at		0.324769	0.324769	0.324769		0.324769		0.0517397	0.0517397	0.0517397		0.0517397		25000000	25000000	25000000		25000000		0	0.324769			0.324769	0.0517397	25000000	1	0	1	266766	1388686_at	0.324769	0.324769		0.0517397
GO:0007623	3	circadian rhythm	161	166	5	5	5	0.92149	0.17824	0.22684	3.01	170913;246097;25690;81813;24311	Abcb1a;Fas;Ahr;Klf10;Ddc	1370464_at,1370465_at;1397221_s_at;1369146_a_at;1368650_at;1368064_a_at		8.74472	2.46199	0.0158072	13.0767	8.94206	14.2313	4.19242	0.0641274	6.31202e-05	9.26479	5.08104	9.9202	5.10002e+06	60.9906	10.0651	1.11265e+07	9.72533e+06	1.35882e+07					2.461988;0.0158072;0.487373;31.0897;9.66871	0.077203;6.31202E-5;0.0641274;20.7657;0.0550111	10.065059999999999;500000.0;2.5E7;60.9906;31.8289	5	1	4	170913;246097;25690;24311	1370464_at,1370465_at;1397221_s_at;1369146_a_at;1368064_a_at	3.15847	1.47468	4.46764	0.0491012
GO:0007626	3	locomotory behavior	188	191	3	2	2	0.33029	0.86051	0.77907	1.05	81661;171099	Gmfb;Rasd2	1387663_at;1370372_at	81661(-0.1388)	9.68902	9.68902	9.25174	0.618407	9.56089	0.591263	2.78473	2.78473	0.107863	3.78566	3.56911	3.61949	32.0953	32.0953	27.386	6.66003	30.7154	6.36769					10.1263;9.25174	0.107863;5.46159	36.8047;27.386	1	1	1	81661	1387663_at	10.1263	10.1263		0.107863
GO:0007631	3	feeding behavior	91	96	1	1	1	0.48365	0.82519	1	1.04	24536	Lepr	1370604_at,1370605_s_at,1371223_a_at,1388232_a_at	24536(-0.2274)	14.379	14.379	14.379		14.379		5.4455	5.4455	5.4455		5.4455		6.37502e+06	6.37502e+06	6.37502e+06		6.37502e+06						14.379	5.4455	6.37502e+06	0	4	0
GO:0008015	5	blood circulation	8	8	1	1	1	0.99165	0.13483	0.13483	12.5	25690	Ahr	1369146_a_at		0.487373	0.487373	0.487373		0.487373		0.0641274	0.0641274	0.0641274		0.0641274		25000000	25000000	25000000		25000000		0	0.487373	0	0.487373	0.487373	0.0641274	25000000	1	0	1	25690	1369146_a_at	0.487373	0.487373		0.0641274
GO:0008016	7	regulation of heart contraction	158	162	4	4	4	0.83366	0.33126	0.5403	2.47	89843;309957;29686;81664	Cxadr;Mef2a;Scn1b;Gnai2	1384816_at;1378360_at;1387010_s_at;1367844_at		24.3933	28.3617	0.288393	17.6584	27.2056	13.3626	15.8255	18.9977	0.057104	11.1574	17.9308	8.18252	125053	87.4194	38.0215	249965	52524.4	176918					22.8164;33.9069;0.288393;40.5617	16.18;21.8155;0.057104;25.2495	38.0215;72.9728;500000.0;101.866	1	3	1	89843	1384816_at	22.8164	22.8164		16.18
GO:0008037	3	cell recognition	96	100	2	2	2	0.73309	0.53832	0.70083	2	60628;116683	Cxcr4;Efna5	1389244_x_at;1375647_at	116683(0.1685)	13.9691	13.9691	0.235955	19.4216	3.99154	13.3452	9.29395	9.29395	0.0107916	13.1284	2.54945	9.02094	1.25e+07	1.25e+07	52.381	1.76776e+07	2.15816e+07	1.21469e+07					0.235955;27.7022	0.0107916;18.5771	2.5E7;52.381	0	2	0
GO:0008038	4	neuron recognition	33	33	2	2	2	0.97909	0.11782	0.11782	6.06	60628;116683	Cxcr4;Efna5	1389244_x_at;1375647_at	116683(0.1685)	13.9691	13.9691	0.235955	19.4216	3.99154	13.3452	9.29395	9.29395	0.0107916	13.1284	2.54945	9.02094	1.25e+07	1.25e+07	52.381	1.76776e+07	2.15816e+07	1.21469e+07	0.5	13.9691			0.235955;27.7022	0.0107916;18.5771	2.5E7;52.381	0	2	0
GO:0008045	6	motor neuron axon guidance	25	25	1	1	1	0.92663	0.36422	0.36422	4	60628	Cxcr4	1389244_x_at		0.235955	0.235955	0.235955		0.235955		0.0107916	0.0107916	0.0107916		0.0107916		25000000	25000000	25000000		25000000						0.235955	0.0107916	25000000	0	1	0
GO:0008064	6	regulation of actin polymerization or depolymerization	153	166	3	2	2	0.42485	0.8021	0.77243	1.2	81661;296654	Gmfb;Gsn	1387663_at;1371414_at	81661(-0.1388)	5.32849	5.32849	0.530685	6.78512	4.67092	6.7211	0.0950591	0.0950591	0.0822551	0.0181075	0.0933042	0.0179366	28.9134	28.9134	21.0222	11.1599	27.8319	11.0546					10.1263;0.530685	0.107863;0.0822551	36.8047;21.0222	1	1	1	81661	1387663_at	10.1263	10.1263		0.107863
GO:0008088	7	axo-dendritic transport	56	59	2	2	2	0.91079	0.28586	0.28586	3.39	689931;316313	Mgarp;Dst	1393627_at;1395274_at	316313(-0.1821)	25.3934	25.3934	14.6526	15.1898	21.5415	14.1794	17.4337	17.4337	11.1178	8.93203	15.1687	8.33789	49.2319	49.2319	21.0678	39.8301	39.1316	37.1806					14.6526;36.1342	11.1178;23.7496	21.0678;77.396	2	0	2	689931;316313	1393627_at;1395274_at	25.3934	25.3934	15.1898	17.4337
GO:0008089	9	anterograde axonal transport	35	35	1	1	1	0.87021	0.4697	0.4697	2.86	689931	Mgarp	1393627_at		14.6526	14.6526	14.6526		14.6526		11.1178	11.1178	11.1178		11.1178		21.0678	21.0678	21.0678		21.0678						14.6526	11.1178	21.0678	1	0	1	689931	1393627_at	14.6526	14.6526		11.1178
GO:0008090	9	retrograde axonal transport	17	17	2	2	2	0.99678	0.036494	0.036494	11.76	689931;316313	Mgarp;Dst	1393627_at;1395274_at	316313(-0.1821)	25.3934	25.3934	14.6526	15.1898	21.5415	14.1794	17.4337	17.4337	11.1178	8.93203	15.1687	8.33789	49.2319	49.2319	21.0678	39.8301	39.1316	37.1806	0	14.6526	0.5	25.3934	14.6526;36.1342	11.1178;23.7496	21.0678;77.396	2	0	2	689931;316313	1393627_at;1395274_at	25.3934	25.3934	15.1898	17.4337
GO:0008104	4	protein localization	1410	1478	16	16	16	0.014124	0.99254	0.028019	1.08	689931;116548;294079;360733;297096;360481;500132;361659;100359823;361846;117514;291671;170824;84384;117106;80881	Mgarp;Pcsk5;March5;Rtp4;Snx10;Dnaja3;Plekha8;Plekha1;Tmem167a;Vps26a;Txnip;Hspa9;Steap3;Timm10b;Scarb2;Serp1	1393627_at;1392773_at;1385790_at;1379285_at;1383585_s_at;1378392_at;1377446_at;1376762_at;1376272_s_at;1371705_at;1371131_a_at;1389930_at;1370374_at;1368977_a_at;1368379_at;1386900_at	116548(-0.2018);500132(-0.25);84384(0.3929)	20.724	23.8411	0.0171458	12.2992	0.0441427		14.1703	16.6823	2.85172e-09	8.0349	0.0282135		1.56254e+06	44.4838	0.117549	6.24999e+06	-1174.53						14.6526;24.5208;37.9616;0.292383;20.0689;31.2133;26.3567;23.1615;29.2859;12.7625;28.4676;0.01714575;33.0854;0.059326;17.2256;32.4532	11.1178;17.1812;24.0916;0.0515247;14.5005;20.8292;18.2261;16.1835;19.8232;9.6347;19.3855;2.85172E-9;21.3888;0.0386051;12.8141;21.4582	21.0678;42.1138;88.4033;2.5E7;31.9693;61.4029;46.8537;39.6472;55.2398;18.4384;52.7858;0.1175485;70.0105;0.126429;25.8244;65.6803	13	3	13	689931;116548;294079;360733;297096;360481;500132;100359823;361846;291671;84384;117106;80881	1393627_at;1392773_at;1385790_at;1379285_at;1383585_s_at;1378392_at;1377446_at;1376272_s_at;1371705_at;1389930_at;1368977_a_at;1368379_at;1386900_at	18.99	20.0689	12.9462	13.059
GO:0008150	1	biological_process	11848	12712	228	223	223	1	1	1	1.75	64473;308097;290802;679806;688283;296086;689931;316010;296959;685691;305844;680860;295160;297989;304608;305078;300474;266730;503568;307395;297768;406164;288985;312688;298490;361643;299857;266766;116548;171402;292728;245920;266685;171518;25419;25315;171400;24314;171125;64305;24297;25627;25642;170496;24423;24539;58819;294079;288444;360596;303538;297783;363017;305419;89843;309187;311169;298884;60336…	Bpnt1;Tagap;Ubxn8;Fer1l5;Afmid;Ndufaf1;Mgarp;Camp;Cpa2;Eid2;Rnase1l2;Eppk1;Mnd1;Ddx58;Mmp19;Lamb3;Adamts15;Slc17a3;Slc13a4;Ablim3;Lactb2;Pbx2;Insig2;Usp18;Ppcs;Lcmt1;Shmt2;Rcan1;Pcsk5;Elovl6;Cyp2b21;Cxcl10;Ugt2b17;Cyp2c22;Crp;Ephx1;Elovl5;Nqo1;Ptprh;Sult1b1;Cyp1a2;Cma1;Cyp3a23/3a1;Lcn2;Gstm1;Lpl;Txnrd1;March5;Hsph1;Msi2;Dhx58;Mybl1;Taf1d;Pi4k2b;Cxadr;Atl3;Rtn4rl2;Gen1;Arpp19;Aldh1b1;Psmd14;Tsku;N…	1398317_at;1397958_at;1397349_at;1396729_at;1396300_at,1396301_x_at;1393689_at;1393627_at;1393603_at;1393397_at;1393058_at;1393026_at;1392012_at;1391626_at;1391463_at;1391095_at;1391022_at;1390931_at;1390591_at;1390532_at;1390255_at;1389551_at;1389432_at;1389377_at,1393690_at;1389034_at;1388756_at;1388747_at;1388695_at;1388686_at;1392773_at;1388108_at;1387993_at;1387969_at;1387955_at;1387949_at;1…	116548(-0.2018);360596(-0.06164);363017(-0.3027);301431(0.199);316313(-0.1821);81661(-0.1388);305888(-0.1592);500132(-0.25);307858(0.4791);289185(0.2709);29454(-0.1579);313278(-0.121);363239(0.4848);302935(0.4456);619558(0.3826);294400(0.1633);296271(0.1277);24536(-0.2274);116683(0.1685);64558(0.3921);84384(0.3929)	20.282	22.3728	0.0158072	13.655	5.41016	4.55802	12.8348	15.7425	2.85172e-09	9.37615	0.0447733		1.87878e+06	47.7634	0.117549	6.48109e+06	326568						13.3274;35.1155;3.99879;38.8047;31.613799999999998;24.8909;14.6526;30.0616;29.9005;25.2334;0.130311;7.07448;6.70004;19.5705;29.5192;0.101913;9.32139;37.2018;30.3269;0.269704;17.3415;11.7221;18.81295;5.23919;18.8759;23.1385;7.86658;0.324769;24.5208;9.61605;0.401481;0.324767;0.0619393;30.3304;20.2265;8.09437;35.3004;8.72415;11.7156;34.7354;6.06621;0.01714575;1.75171;39.4681;20.1987;36.9287;21.6641;…	10.0313;22.1522;0.0301446;25.3307;21.33885;17.3947;11.1178;20.2323;19.5447;17.5909;0.0308581;0.107778;2.2455;14.1871;20.2773;6.05417E-7;0.0394699;24.0738;20.3709;0.064511;12.752;8.8494;13.64725;0.185977;13.7458;16.3715;2.76025;0.0517397;17.1812;2.85924;0.0843416;0.0408567;0.0254314;20.3727;14.599;2.7845;22.8512;3.19261;0.109207;22.5803;0.185991;2.85172E-9;0.0435876;25.4163;14.5817;23.617;15.6676;…	19.3769;79.2566;14.9498;87.7468;61.50750000000001;43.0405;21.0678;57.6531;60.1257;43.9106;500000.0;2.5E7;16.9955;30.9363;54.4716;2.5E7;2.5E7;83.0684;58.4989;14.6268;26.5328;16.903;29.77735;15.8255;29.5271;38.7737;20.2174;2.5E7;42.1138;27.9604;500000.0;2.5E7;0.270322;58.51;32.2998;20.9633;76.5826;22.2679;2.5E7;74.2881;16.8801;0.1175485;14.034;92.3515;32.2415;83.6043;34.7079;88.4033;42.88935;60.859…	181	72	161	64473;290802;679806;688283;296086;689931;685691;305844;680860;295160;297989;304608;266730;297768;288985;312688;298490;299857;266766;116548;171402;292728;245920;266685;171518;25419;25315;171400;24314;171125;64305;24297;25642;170496;24423;24539;58819;294079;288444;303538;297783;305419;89843;309187;311169;60336;311078;308843;301431;266735;286896;296750;316313;298693;311021;501907;679692;364070;30526…	1398317_at;1397349_at;1396729_at;1396300_at,1396301_x_at;1393689_at;1393627_at;1393058_at;1393026_at;1392012_at;1391626_at;1391463_at;1391095_at;1390591_at;1389551_at;1389377_at,1393690_at;1389034_at;1388756_at;1388695_at;1388686_at;1392773_at;1388108_at;1387993_at;1387969_at;1387955_at;1387949_at;1387830_at;1387669_a_at;1387630_at;1387599_a_at;1387444_at;1387314_at;1387243_at;1387118_at;1387011_…	19.7135	21.0062	13.0436	12.4904
GO:0008152	2	metabolic process	6085	6526	140	137	137	0.99697	0.004535	0.0089853	2.1	64473;290802;688283;296086;296959;305844;295160;304608;300474;266730;307395;297768;288985;312688;298490;361643;299857;116548;171402;292728;171518;25419;25315;171400;24314;171125;64305;24297;25627;25642;24423;24539;58819;294079;297783;363017;305419;298884;298079;311078;286896;287603;298693;311021;501907;679692;291132;364070;362676;313843;308519;360481;309957;309544;313837;299194;363465;498685;3617…	Bpnt1;Ubxn8;Afmid;Ndufaf1;Cpa2;Rnase1l2;Mnd1;Mmp19;Adamts15;Slc17a3;Ablim3;Lactb2;Insig2;Usp18;Ppcs;Lcmt1;Shmt2;Pcsk5;Elovl6;Cyp2b21;Cyp2c22;Crp;Ephx1;Elovl5;Nqo1;Ptprh;Sult1b1;Cyp1a2;Cma1;Cyp3a23/3a1;Gstm1;Lpl;Txnrd1;March5;Mybl1;Taf1d;Pi4k2b;Gen1;Aldh1b1;Psmd14;Sgpl1;Tex14;Isg15;Nmi;RGD1559459;Lpgat1;Gpld1;Iars2;Fam213b;Galm;Dpy19l3;Dnaja3;Mef2a;Rbm20;RGD1562284;Ptgr2;Pir;Aaed1;Dak;Plekha1;Ldhd…	1398317_at;1397349_at;1396300_at,1396301_x_at;1393689_at;1393397_at;1393026_at;1391626_at;1391095_at;1390931_at;1390591_at;1390255_at;1389551_at;1389377_at,1393690_at;1389034_at;1388756_at;1388747_at;1388695_at;1392773_at;1388108_at;1387993_at;1387949_at;1387830_at;1387669_a_at;1387630_at;1387599_a_at;1387444_at;1387314_at;1387243_at;1387173_at;1387118_at;1386985_at;1386965_at;1386958_at;1385790_…	116548(-0.2018);363017(-0.3027);307858(0.4791);313278(-0.121);619558(0.3826);294400(0.1633);24536(-0.2274)	20.5194	22.0766	0.0158072	13.2531	4.78026		13.0478	15.7161	2.85172e-09	9.2348	0.0372417		1.22054e+06	43.0405	0.117549	5.1857e+06	492052						13.3274;3.99879;31.613799999999998;24.8909;29.9005;0.130311;6.70004;29.5192;9.32139;37.2018;0.269704;17.3415;18.81295;5.23919;18.8759;23.1385;7.86658;24.5208;9.61605;0.401481;30.3304;20.2265;8.09437;35.3004;8.72415;11.7156;34.7354;6.06621;0.01714575;1.75171;20.1987;36.9287;21.6641;37.9616;30.3994;48.7874;39.7988;33.6809;22.3728;39.2949;22.451;4.86357;29.9319;0.230619;6.38914;20.1019;9.29434;16.86…	10.0313;0.0301446;21.33885;17.3947;19.5447;0.0308581;2.2455;20.2773;0.0394699;24.0738;0.064511;12.752;13.64725;0.185977;13.7458;16.3715;2.76025;17.1812;2.85924;0.0843416;20.3727;14.599;2.7845;22.8512;3.19261;0.109207;22.5803;0.185991;2.85172E-9;0.0435876;14.5817;23.617;15.6676;24.0916;20.4086;31.8194;24.9151;21.1562;15.7161;25.1873;15.9613;0.107723;20.1643;0.0445238;2.35873;14.5212;4.33067;12.620…	19.3769;14.9498;61.50750000000001;43.0405;60.1257;500000.0;16.9955;54.4716;2.5E7;83.0684;14.6268;26.5328;29.77735;15.8255;29.5271;38.7737;20.2174;42.1138;27.9604;500000.0;58.51;32.2998;20.9633;76.5826;22.2679;2.5E7;74.2881;16.8801;0.1175485;14.034;32.2415;83.6043;34.7079;88.4033;58.7317;58.59;97.6928;75.2628;37.7909;92.2647;37.1795;500000.0;57.2437;2.5E7;15.8599;32.0384;24.0279;24.9819;50.2806;47…	116	42	103	64473;290802;688283;296086;305844;295160;304608;266730;297768;288985;312688;298490;299857;116548;171402;292728;171518;25419;25315;171400;24314;171125;64305;24297;25642;24423;24539;58819;294079;297783;305419;311078;286896;298693;311021;501907;679692;364070;362676;308519;360481;309544;299194;363465;498685;307858;300803;304543;363285;298652;100361188;303735;680945;619558;314312;294400;300211;305234;…	1398317_at;1397349_at;1396300_at,1396301_x_at;1393689_at;1393026_at;1391626_at;1391095_at;1390591_at;1389551_at;1389377_at,1393690_at;1389034_at;1388756_at;1388695_at;1392773_at;1388108_at;1387993_at;1387949_at;1387830_at;1387669_a_at;1387630_at;1387599_a_at;1387444_at;1387314_at;1387243_at;1387118_at;1386985_at;1386965_at;1386958_at;1385790_at;1385132_at;1384950_at;1386073_at;1382843_at;1382314_…	19.9672	21.0062	12.7745	12.7772
GO:0008154	6	actin polymerization or depolymerization	38	43	1	1	1	0.82	0.54138	0.54138	2.33	296654	Gsn	1371414_at		0.530685	0.530685	0.530685		0.530685		0.0822551	0.0822551	0.0822551		0.0822551		21.0222	21.0222	21.0222		21.0222						0.530685	0.0822551	21.0222	0	1	0
GO:0008202	5	steroid metabolic process	189	202	14	14	14	1	1.6564e-05	1.6564e-05	6.93	288985;64305;24297;286896;501907;361659;293989;191574;171352;246074;24296;24536;25426;25080	Insig2;Sult1b1;Cyp1a2;Sgpl1;RGD1559459;Plekha1;Cyp2c6v1;Akr1c14;Cyp3a9;Scd1;Cyp1a1;Lepr;Cyp1b1;Apoa4	1389377_at,1393690_at;1387314_at;1387243_at;1382843_at;1381852_at;1376762_at;1370580_a_at;1370563_at,1370708_a_at,1396933_s_at;1370387_at;1370355_at;1370269_at;1370604_at,1370605_s_at,1371223_a_at,1388232_a_at;1368990_at;1368520_at	24536(-0.2274)	16.3407	19.4356	0.140946	11.7479	16.2597	12.713	10.416	12.8457	0.0493054	8.63511	10.4436	9.19131	1.08634e+06	42.6443	13.316	2.68635e+06	744761	2.16983e+06	9.5	24.531			18.81295;34.7354;6.06621;22.451;6.38914;23.1615;0.147057;20.05819333333333;25.9004;28.83;0.140946;14.379010000000001;27.2489;0.44934	13.64725;22.5803;0.185991;15.9613;2.35873;16.1835;0.0493054;12.044102500000001;17.9697;20.5359;0.0512492;5.44549525;18.7215;0.0892025	29.77735;74.2881;16.8801;37.1795;15.8599;39.6472;13.512;8333364.1421;45.6414;49.6939;13.316;6375024.07585;49.2941;500000.0	15	5	12	288985;64305;24297;286896;501907;293989;191574;171352;246074;24296;25426;25080	1389377_at,1393690_at;1387314_at;1387243_at;1382843_at;1381852_at;1370580_a_at;1370563_at,1370708_a_at,1396933_s_at;1370387_at;1370355_at;1370269_at;1368990_at;1368520_at	15.9358	19.4356	12.5836	10.3495
GO:0008203	6	cholesterol metabolic process	86	89	3	3	3	0.92413	0.21434	0.21434	3.37	288985;24536;25080	Insig2;Lepr;Apoa4	1389377_at,1393690_at;1370604_at,1370605_s_at,1371223_a_at,1388232_a_at;1368520_at	24536(-0.2274)	11.2138	14.379	0.44934	9.58226	10.0459	9.61451	6.39398	5.4455	0.0892025	6.82861	5.37854	6.44904	2.29168e+06	500000	29.7773	3.5451e+06	2.51789e+06	3.58494e+06					18.81295;14.379010000000001;0.44934	13.64725;5.44549525;0.0892025	29.77735;6375024.07585;500000.0	3	4	2	288985;25080	1389377_at,1393690_at;1368520_at	9.63115	9.63115	12.985	6.86823
GO:0008207	6	C21-steroid hormone metabolic process	19	25	1	1	1	0.92663	0.36422	0.36422	4	191574	Akr1c14	1370563_at,1370708_a_at,1396933_s_at		20.0582	20.0582	20.0582		20.0582		12.0441	12.0441	12.0441		12.0441		8.33336e+06	8.33336e+06	8.33336e+06		8.33336e+06						20.0582	12.0441	8.33336e+06	3	0	1	191574	1370563_at,1370708_a_at,1396933_s_at	20.0582	20.0582		12.0441
GO:0008209	6	androgen metabolic process	24	25	2	2	2	0.99021	0.073368	0.073368	8	286896;361659	Sgpl1;Plekha1	1382843_at;1376762_at		22.8062	22.8062	22.451	0.502399	23.1568	0.0812022	16.0724	16.0724	15.9613	0.157119	16.182	0.025395	38.4133	38.4133	37.1795	1.74493	39.631	0.282031	0.5	22.8062			22.451;23.1615	15.9613;16.1835	37.1795;39.6472	1	1	1	286896	1382843_at	22.451	22.451		15.9613
GO:0008210	6	estrogen metabolic process	16	17	3	3	3	0.9998	0.0032153	0.0032153	17.65	286896;361659;25426	Sgpl1;Plekha1;Cyp1b1	1382843_at;1376762_at;1368990_at		24.2871	23.1615	22.451	2.58945	25.1525	2.50562	16.9554	16.1835	15.9613	1.53349	17.4205	1.5547	42.0403	39.6472	37.1795	6.40203	44.3435	5.91822	0	22.451	0.5	22.8062	22.451;23.1615;27.2489	15.9613;16.1835;18.7215	37.1795;39.6472;49.2941	2	1	2	286896;25426	1382843_at;1368990_at	24.8499	24.8499	3.39263	17.3414
GO:0008213	7	protein alkylation	98	109	1	1	1	0.4148	0.8621	1	0.92	361643	Lcmt1	1388747_at		23.1385	23.1385	23.1385		23.1385		16.3715	16.3715	16.3715		16.3715		38.7737	38.7737	38.7737		38.7737						23.1385	16.3715	38.7737	0	1	0
GO:0008215	7	spermine metabolic process	6	6	1	1	1	0.99542	0.10292	0.10292	16.67	360547	Sat2	1374892_at		0.150424	0.150424	0.150424		0.150424		0.053226	0.053226	0.053226		0.053226		6.28806	6.28806	6.28806		6.28806		0	0.150424	0	0.150424	0.150424	0.053226	6.28806	0	1	0
GO:0008216	7	spermidine metabolic process	6	7	1	1	1	0.99366	0.11902	0.11902	14.29	360547	Sat2	1374892_at		0.150424	0.150424	0.150424		0.150424		0.053226	0.053226	0.053226		0.053226		6.28806	6.28806	6.28806		6.28806		0	0.150424	0	0.150424	0.150424	0.053226	6.28806	0	1	0
GO:0008217	4	regulation of blood pressure	149	160	1	1	1	0.21481	0.94575	0.37533	0.62	25690	Ahr	1369146_a_at		0.487373	0.487373	0.487373		0.487373		0.0641274	0.0641274	0.0641274		0.0641274		25000000	25000000	25000000		25000000						0.487373	0.0641274	25000000	1	0	1	25690	1369146_a_at	0.487373	0.487373		0.0641274
GO:0008219	3	cell death	472	498	10	10	10	0.71777	0.4033	0.72855	2.01	360481;309957;310670;296654;170824;25697;246097;116683;25690;24162	Dnaja3;Mef2a;Adamtsl4;Gsn;Steap3;Ctsl;Fas;Efna5;Ahr;Acp2	1378392_at;1378360_at;1372426_at;1371414_at;1370374_at;1370244_at;1397221_s_at;1375647_at;1369146_a_at;1367906_at	116683(0.1685)	18.9705	27.6126	0.0158072	16.2575	14.2157	16.8868	12.3996	18.7247	6.31202e-05	10.6959	9.1341	11.0588	2.55004e+06	65.7067	4.56418	7.88968e+06	5.99155e+06	1.12236e+07					31.2133;33.9069;35.1211;0.530685;33.0854;0.119104;0.0158072;27.7022;0.487373;27.523	20.8292;21.8155;22.3289;0.0822551;21.3888;0.0377096;6.31202E-5;18.5771;0.0641274;18.8722	61.4029;72.9728;78.3307;21.0222;70.0105;4.56418;500000.0;52.381;2.5E7;50.0632	5	5	5	360481;25697;246097;25690;24162	1378392_at;1370244_at;1397221_s_at;1369146_a_at;1367906_at	11.8717	0.487373	16.0261	7.96066
GO:0008277	6	regulation of G-protein coupled receptor protein signaling pathway	95	98	2	2	2	0.74278	0.52742	0.69597	2.04	29547;81664	Homer2;Gnai2	1368872_a_at;1367844_at		38.1819	38.1819	35.8021	3.36555	37.0818	2.98435	21.8697	21.8697	18.4899	4.77976	20.3073	4.23838	74.9533	74.9533	48.0406	38.0603	62.5122	33.7494					35.8021;40.5617	18.4899;25.2495	48.0406;101.866	1	1	1	29547	1368872_a_at	35.8021	35.8021		18.4899
GO:0008283	2	cell proliferation	468	493	13	13	13	0.93937	0.10677	0.16228	2.64	116548;58819;363143;314312;58919;170913;24296;60628;81613;81707;100912108;81664;24484	Pcsk5;Txnrd1;Gnat1;Entpd5;Ccnd1;Abcb1a;Cyp1a1;Cxcr4;Ceacam1;Mmp14;Nupr1;Gnai2;Igfbp3	1392773_at;1386958_at;1373587_at;1372774_at,1382434_at,1382544_at;1371150_at,1371643_at,1383075_at;1370464_at,1370465_at;1370269_at;1389244_x_at;1374620_at,1382975_at;1367860_a_at;1367847_at;1367844_at;1367652_at	116548(-0.2018)	23.1169	24.5208	0.140946	14.6348	19.5904	15.0134	14.993	17.1812	0.0107916	9.49379	12.6492	9.90172	1.92313e+06	59.101	10.0651	6.93374e+06	2.45284e+06	7.74029e+06					24.5208;21.6641;34.1415;21.006220000000003;15.557466666666665;2.461988;0.140946;0.235955;30.432450000000003;37.5583;35.7108;40.5617;36.5276	17.1812;15.6676;22.2926;12.870903333333333;11.556399999999998;0.077203;0.0512492;0.0107916;20.409799999999997;23.9073;22.5936;25.2495;23.0409	42.1138;34.7079;71.9494;41.02843333333333;23.282066666666665;10.065059999999999;13.316;2.5E7;59.101;86.4955;80.9168;101.866;84.1046	11	8	7	116548;58819;363143;314312;170913;24296;81613	1392773_at;1386958_at;1373587_at;1372774_at,1382434_at,1382544_at;1370464_at,1370465_at;1370269_at;1374620_at,1382975_at	19.1954	21.6641	13.1052	12.6501
GO:0008284	6	positive regulation of cell proliferation	817	856	13	13	13	0.32085	0.77193	0.68804	1.52	316010;680860;299857;245920;680102;360481;260326;58919;60335;81613;25476;64535;81664	Camp;Eppk1;Shmt2;Cxcl10;Mab21l2;Dnaja3;Gpr56;Ccnd1;Tgm1;Ceacam1;Lgals9;Fgfbp1;Gnai2	1393603_at;1392012_at;1388695_at;1387969_at;1378988_at;1378392_at;1371696_at;1371150_at,1371643_at,1383075_at;1370051_at;1374620_at,1382975_at;1387027_a_at;1368349_at;1367844_at		21.2504	27.6837	0.324767	14.5462	18.9775	14.8547	13.2032	19.4656	0.0408567	10.2489	11.7088	10.3981	3.88466e+06	61.4029	13.9571	9.37227e+06	7.36589e+06	1.18597e+07					30.0616;7.07448;7.86658;0.324767;4.67865;31.2133;37.9776;15.557466666666665;27.6837;30.432450000000003;36.5565;6.26631;40.5617	20.2323;0.107778;2.76025;0.0408567;0.157045;20.8292;23.3019;11.556399999999998;19.4656;20.409799999999997;23.4439;4.08757;25.2495	57.6531;2.5E7;20.2174;2.5E7;500000.0;61.4029;93.5361;23.282066666666665;48.3628;59.101;81.9429;13.9571;101.866	10	6	9	680860;299857;245920;680102;360481;60335;81613;25476;64535	1392012_at;1388695_at;1387969_at;1378988_at;1378392_at;1370051_at;1374620_at,1382975_at;1387027_a_at;1368349_at	16.8996	7.86658	14.1686	10.1447
GO:0008285	6	negative regulation of cell proliferation	573	599	14	14	14	0.87938	0.18883	0.27151	2.34	680860;89843;291132;360481;29454;260326;294270;25697;81613;25476;29200;25426;100912108;24484	Eppk1;Cxadr;Gpld1;Dnaja3;Gdf11;Gpr56;RT1-Db1;Ctsl;Ceacam1;Lgals9;Inhba;Cyp1b1;Nupr1;Igfbp3	1392012_at;1384816_at;1380833_at;1378392_at;1374706_at;1371696_at;1370382_at,1370383_s_at;1370244_at;1374620_at,1382975_at;1387027_a_at;1369012_at,1383486_at;1368990_at;1367847_at;1367652_at	29454(-0.1579)	22.8379	28.8407	0.119104	14.9061	19.2388	14.6568	14.278	19.5656	0.0377096	10.1901	11.7534	10.2993	3.58933e+06	71.1599	4.56418	9.07107e+06	6.02267e+06	1.10809e+07					7.07448;22.8164;9.29434;31.2133;1.62109;37.9776;4.6979455;0.119104;30.432450000000003;36.5565;38.44015;27.2489;35.7108;36.5276	0.107778;16.18;4.33067;20.8292;0.105802;23.3019;2.6781043;0.0377096;20.409799999999997;23.4439;24.11155;18.7215;22.5936;23.0409	2.5E7;38.0215;24.0279;61.4029;2.5E7;93.5361;250023.52665;4.56418;59.101;81.9429;53.34895;49.2941;80.9168;84.1046	10	7	8	680860;89843;360481;294270;25697;81613;25476;25426	1392012_at;1384816_at;1378392_at;1370382_at,1370383_s_at;1370244_at;1374620_at,1382975_at;1387027_a_at;1368990_at	20.0199	25.0327	13.9675	12.801
GO:0008286	8	insulin receptor signaling pathway	55	56	1	1	1	0.73415	0.63787	1	1.79	291132	Gpld1	1380833_at		9.29434	9.29434	9.29434		9.29434		4.33067	4.33067	4.33067		4.33067		24.0279	24.0279	24.0279		24.0279						9.29434	4.33067	24.0279	0	1	0
GO:0008299	5	isoprenoid biosynthetic process	26	28	2	2	2	0.9866	0.089309	0.089309	7.14	294400;24296	Nus1;Cyp1a1	1392522_at;1370269_at	294400(0.1633)	12.2378	12.2378	0.140946	17.1075	9.82612	16.7641	8.56232	8.56232	0.0512492	12.0365	6.86554	11.7949	27.4845	27.4845	13.316	20.0374	24.6599	19.6351	0.5	12.2378			24.3346;0.140946	17.0734;0.0512492	41.6531;13.316	2	0	2	294400;24296	1392522_at;1370269_at	12.2378	12.2378	17.1075	8.56232
GO:0008340	3	determination of adult lifespan	15	16	1	1	1	0.96742	0.25155	0.25155	6.25	25700	Ide	1387652_at		15.7599	15.7599	15.7599		15.7599		11.7975	11.7975	11.7975		11.7975		23.2687	23.2687	23.2687		23.2687		0	15.7599			15.7599	11.7975	23.2687	1	0	1	25700	1387652_at	15.7599	15.7599		11.7975
GO:0008344	4	adult locomotory behavior	89	91	1	0	0	0.1915	1	0.41524	0																														0	0	0
GO:0008347	5	glial cell migration	20	20	2	2	2	0.99482	0.049234	0.049234	10	260326;81707	Gpr56;Mmp14	1371696_at;1367860_a_at		37.7679	37.7679	37.5583	0.29649	37.933	0.182739	23.6046	23.6046	23.3019	0.428082	23.3662	0.263845	90.0158	90.0158	86.4955	4.97846	92.788	3.06843	0	37.5583	1	37.9776	37.9776;37.5583	23.3019;23.9073	93.5361;86.4955	0	2	0
GO:0008354	4	germ cell migration	9	9	2	2	2	0.99956	0.010611	0.010611	22.22	89843;60628	Cxadr;Cxcr4	1384816_at;1389244_x_at		11.5262	11.5262	0.235955	15.9668	11.9127	15.9574	8.0954	8.0954	0.0107916	11.4334	8.37216	11.4267	1.25e+07	1.25e+07	38.0215	1.76776e+07	1.20721e+07	1.76673e+07	0	0.235955	0	0.235955	22.8164;0.235955	16.18;0.0107916	38.0215;2.5E7	1	1	1	89843	1384816_at	22.8164	22.8164		16.18
GO:0008361	5	regulation of cell size	77	81	1	1	1	0.57188	0.77023	1	1.23	25690	Ahr	1369146_a_at		0.487373	0.487373	0.487373		0.487373		0.0641274	0.0641274	0.0641274		0.0641274		25000000	25000000	25000000		25000000						0.487373	0.0641274	25000000	1	0	1	25690	1369146_a_at	0.487373	0.487373		0.0641274
GO:0008366	4	axon ensheathment	76	76	1	1	1	0.60312	0.74832	1	1.32	362911	Mal2	1372755_at		28.3947	28.3947	28.3947		28.3947		19.3462	19.3462	19.3462		19.3462		52.5715	52.5715	52.5715		52.5715						28.3947	19.3462	52.5715	1	0	1	362911	1372755_at	28.3947	28.3947		19.3462
GO:0008380	8	RNA splicing	188	203	1	1	1	0.11745	0.97537	0.27572	0.49	309544	Rbm20	1391810_at		26.7666	26.7666	26.7666		26.7666		18.4547	18.4547	18.4547		18.4547		47.9633	47.9633	47.9633		47.9633						26.7666	18.4547	47.9633	1	0	1	309544	1391810_at	26.7666	26.7666		18.4547
GO:0008406	5	gonad development	131	140	8	8	8	0.99906	0.0037274	0.0037274	5.71	286896;361659;25697;24536;29200;25426;81707;100912108	Sgpl1;Plekha1;Ctsl;Lepr;Inhba;Cyp1b1;Mmp14;Nupr1	1382843_at;1376762_at;1370244_at;1370604_at,1370605_s_at,1371223_a_at,1388232_a_at;1369012_at,1383486_at;1368990_at;1367860_a_at;1367847_at	24536(-0.2274)	24.8836	25.2052	0.119104	13.0918	22.0045	11.9493	15.8702	17.4525	0.0377096	8.82608	14.0071	8.45297	796922	51.3215	4.56418	2.25389e+06	1.11228e+06	2.58642e+06	6	37.5583			22.451;23.1615;0.119104;14.379010000000001;38.44015;27.2489;37.5583;35.7108	15.9613;16.1835;0.0377096;5.44549525;24.11155;18.7215;23.9073;22.5936	37.1795;39.6472;4.56418;6375024.07585;53.34895;49.2941;86.4955;80.9168	3	9	3	286896;25697;25426	1382843_at;1370244_at;1368990_at	16.6063	22.451	14.4785	11.5735
GO:0008584	6	male gonad development	114	123	6	6	6	0.99333	0.023368	0.023368	4.88	25697;24536;29200;25426;81707;100912108	Ctsl;Lepr;Inhba;Cyp1b1;Mmp14;Nupr1	1370244_at;1370604_at,1370605_s_at,1371223_a_at,1388232_a_at;1369012_at,1383486_at;1368990_at;1367860_a_at;1367847_at	24536(-0.2274)	25.576	31.4798	0.119104	15.4143	21.6228	14.1026	15.8029	20.6576	0.0377096	10.4419	13.2867	9.86782	1.06255e+06	67.1329	4.56418	2.60257e+06	1.4807e+06	2.94892e+06					0.119104;14.379010000000001;38.44015;27.2489;37.5583;35.7108	0.0377096;5.44549525;24.11155;18.7215;23.9073;22.5936	4.56418;6375024.07585;53.34895;49.2941;86.4955;80.9168	2	8	2	25697;25426	1370244_at;1368990_at	13.684	13.684	19.1837	9.3796
GO:0008585	6	female gonad development	28	29	2	2	2	0.98524	0.094832	0.094832	6.9	286896;361659	Sgpl1;Plekha1	1382843_at;1376762_at		22.8062	22.8062	22.451	0.502399	23.1568	0.0812022	16.0724	16.0724	15.9613	0.157119	16.182	0.025395	38.4133	38.4133	37.1795	1.74493	39.631	0.282031	0.5	22.8062			22.451;23.1615	15.9613;16.1835	37.1795;39.6472	1	1	1	286896	1382843_at	22.451	22.451		15.9613
GO:0008589	6	regulation of smoothened signaling pathway	64	64	1	1	1	0.68094	0.6869	1	1.56	29441	Por	1368213_at,1387109_at		15.4996	15.4996	15.4996		15.4996		9.02697	9.02697	9.02697		9.02697		30.4732	30.4732	30.4732		30.4732						15.4996	9.02697	30.4732	2	0	1	29441	1368213_at,1387109_at	15.4996	15.4996		9.02697
GO:0008593	6	regulation of Notch signaling pathway	68	70	1	1	1	0.64161	0.71928	1	1.43	81707	Mmp14	1367860_a_at		37.5583	37.5583	37.5583		37.5583		23.9073	23.9073	23.9073		23.9073		86.4955	86.4955	86.4955		86.4955						37.5583	23.9073	86.4955	0	1	0
GO:0008608	4	attachment of spindle microtubules to kinetochore	16	18	1	1	1	0.95942	0.27819	0.27819	5.56	287603	Tex14	1382487_at		4.86357	4.86357	4.86357		4.86357		0.107723	0.107723	0.107723		0.107723		500000	500000	500000		500000		0	4.86357			4.86357	0.107723	500000	0	1	0
GO:0008610	5	lipid biosynthetic process	335	351	10	10	10	0.94814	0.10083	0.1473	2.85	288985;171402;171400;24539;362676;294400;246074;24296;24913;25080	Insig2;Elovl6;Elovl5;Lpl;Fam213b;Nus1;Scd1;Cyp1a1;Pla2g16;Apoa4	1389377_at,1393690_at;1388108_at;1387630_at;1386965_at;1379367_at;1392522_at;1370355_at;1370269_at;1370202_at;1368520_at	294400(0.1633)	20.8806	21.5738	0.140946	16.5555	20.4139	16.3351	13.0116	15.3603	0.0512492	11.3205	13.0728	11.2102	50040.2	45.6735	13.316	158100	63903.5	175906					18.81295;9.61605;35.3004;36.9287;48.0248;24.3346;28.83;0.140946;6.36787;0.44934	13.64725;2.85924;22.8512;23.617;29.3052;17.0734;20.5359;0.0512492;0.0860943;0.0892025	29.77735;27.9604;76.5826;83.6043;50.2806;41.6531;49.6939;13.316;29.194;500000.0	10	1	9	288985;171402;171400;24539;362676;294400;246074;24296;25080	1389377_at,1393690_at;1388108_at;1387630_at;1386965_at;1379367_at;1392522_at;1370355_at;1370269_at;1368520_at	22.4931	24.3346	16.706	14.4477
GO:0008625	7	extrinsic apoptotic signaling pathway via death domain receptors	25	26	1	1	1	0.92143	0.37564	0.37564	3.85	246097	Fas	1397221_s_at		0.0158072	0.0158072	0.0158072		0.0158072		6.31202e-05	6.31202e-05	6.31202e-05		6.31202e-05		500000	500000	500000		500000						0.0158072	6.31202e-05	500000	1	0	1	246097	1397221_s_at	0.0158072	0.0158072		6.31202e-05
GO:0008626	6	granzyme-mediated apoptotic signaling pathway	5	15	1	1	1	0.97116	0.23786	0.23786	6.67	298652	Ube4b	1374507_at,1376862_at		21.3806	21.3806	21.3806		21.3806		15.4179	15.4179	15.4179		15.4179		34.3804	34.3804	34.3804		34.3804		0	21.3806			21.3806	15.4179	34.3804	2	0	1	298652	1374507_at,1376862_at	21.3806	21.3806		15.4179
GO:0008630	7	intrinsic apoptotic signaling pathway in response to DNA damage	64	65	1	1	1	0.67433	0.69254	1	1.54	100912108	Nupr1	1367847_at		35.7108	35.7108	35.7108		35.7108		22.5936	22.5936	22.5936		22.5936		80.9168	80.9168	80.9168		80.9168						35.7108	22.5936	80.9168	0	1	0
GO:0008631	7	intrinsic apoptotic signaling pathway in response to oxidative stress	18	18	1	1	1	0.95942	0.27819	0.27819	5.56	25426	Cyp1b1	1368990_at		27.2489	27.2489	27.2489		27.2489		18.7215	18.7215	18.7215		18.7215		49.2941	49.2941	49.2941		49.2941		0	27.2489			27.2489	18.7215	49.2941	1	0	1	25426	1368990_at	27.2489	27.2489		18.7215
GO:0008643	6	carbohydrate transport	47	49	1	1	1	0.78072	0.58874	0.58874	2.04	170913	Abcb1a	1370464_at,1370465_at		2.46199	2.46199	2.46199		2.46199		0.077203	0.077203	0.077203		0.077203		10.0651	10.0651	10.0651		10.0651						2.46199	0.077203	10.0651	2	0	1	170913	1370464_at,1370465_at	2.46199	2.46199		0.077203
GO:0008652	6	cellular amino acid biosynthetic process	60	61	1	1	1	0.70082	0.66934	1	1.64	299857	Shmt2	1388695_at		7.86658	7.86658	7.86658		7.86658		2.76025	2.76025	2.76025		2.76025		20.2174	20.2174	20.2174		20.2174						7.86658	2.76025	20.2174	1	0	1	299857	1388695_at	7.86658	7.86658		2.76025
GO:0008654	5	phospholipid biosynthetic process	117	122	1	1	1	0.35343	0.89125	0.72822	0.82	24913	Pla2g16	1370202_at		6.36787	6.36787	6.36787		6.36787		0.0860943	0.0860943	0.0860943		0.0860943		29.194	29.194	29.194		29.194						6.36787	0.0860943	29.194	0	1	0
GO:0009056	3	catabolic process	1236	1318	47	46	46	1	6.8437e-06	8.4011e-06	3.49	290802;688283;312688;292728;171518;25315;64305;24297;24423;24539;58819;298884;298079;311078;286896;298693;313843;361730;363285;298652;303735;680945;619558;305234;310864;494500;192129;286954;293989;171352;24296;25697;24913;81613;25700;24894;29516;24299;25426;171129;24651;25080;29441;81707;25481;83619	Ubxn8;Afmid;Usp18;Cyp2b21;Cyp2c22;Ephx1;Sult1b1;Cyp1a2;Gstm1;Lpl;Txnrd1;Gen1;Aldh1b1;Psmd14;Sgpl1;Isg15;Galm;Dak;Scly;Ube4b;Rnf213;Sdf2l1;Fam134b;Stbd1;Manba;Gsta3;Vmp1;Ugt2b1;Cyp2c6v1;Cyp3a9;Cyp1a1;Ctsl;Pla2g16;Ceacam1;Ide;Cyp2a1;Pde3b;Cyp2a3;Cyp1b1;Uggt1;Pklr;Apoa4;Por;Mmp14;Mmp11;Nfe2l2	1397349_at;1396300_at,1396301_x_at;1389034_at;1387993_at;1387949_at;1387669_a_at;1387314_at;1387243_at;1386985_at;1386965_at;1386958_at;1384102_at;1383472_at;1386073_at;1382843_at;1382314_at;1379250_at;1377048_at;1374524_at;1374507_at,1376862_at;1374337_at;1373043_at;1373011_at;1372602_at;1371875_at;1371089_at;1370807_at;1370698_at;1370580_a_at;1370387_at;1370269_at;1370244_at;1370202_at;1374620_…	619558(0.3826)	18.7343	21.8703	0.0904144	13.2234	17.2887	13.0727	11.7826	15.6919	0.0301446	9.22689	10.879	9.16796	565255	38.4083	0.594918	3.68421e+06	688441	4.08346e+06					3.99879;31.613799999999998;5.23919;0.401481;30.3304;8.09437;34.7354;6.06621;20.1987;36.9287;21.6641;33.6809;22.3728;39.2949;22.451;29.9319;26.6933;28.0913;22.0766;21.3806;29.6021;46.4701;32.0491;6.36817;20.1872;24.6462;7.25388;0.0904144;0.147057;25.9004;0.140946;0.119104;6.36787;30.432450000000003;15.7599;0.732749;27.3061;4.71298;27.2489;25.5557;23.027;0.44934;15.499569999999999;37.5583;0.365629;…	0.0301446;21.33885;0.185977;0.0843416;20.3727;2.7845;22.5803;0.185991;14.5817;23.617;15.6676;21.1562;15.7161;25.1873;15.9613;20.1643;18.414;19.1821;15.7357;15.41795;19.9907;20.9139;21.2547;0.255943;14.5745;17.2537;1.4702;0.0374753;0.0493054;17.9697;0.0512492;0.0377096;0.0860943;20.409799999999997;11.7975;0.0943336;19.0667;0.11957;18.7215;17.7745;16.181649999999998;0.0892025;9.02697;23.9073;0.0613…	14.9498;61.50750000000001;15.8255;500000.0;58.51;20.9633;74.2881;16.8801;32.2415;83.6043;34.7079;75.2628;37.7909;92.2647;37.1795;57.2437;47.7634;51.6873;36.3291;34.380399999999995;56.2131;49.2709;64.2574;18.8269;32.2173;42.4262;20.0989;0.594918;13.512;45.6414;13.316;4.56418;29.194;59.101;23.2687;18.0087;48.0975;14.7999;49.2941;44.7408;39.02565;500000.0;30.4732;86.4955;2.5E7;23.1149	42	9	38	290802;688283;312688;292728;171518;25315;64305;24297;24423;24539;58819;311078;286896;298693;363285;298652;303735;680945;619558;305234;310864;494500;192129;286954;293989;171352;24296;25697;81613;25700;24894;29516;24299;25426;171129;25080;29441;83619	1397349_at;1396300_at,1396301_x_at;1389034_at;1387993_at;1387949_at;1387669_a_at;1387314_at;1387243_at;1386985_at;1386965_at;1386958_at;1386073_at;1382843_at;1382314_at;1374524_at;1374507_at,1376862_at;1374337_at;1373043_at;1373011_at;1372602_at;1371875_at;1371089_at;1370807_at;1370698_at;1370580_a_at;1370387_at;1370269_at;1370244_at;1374620_at,1382975_at;1387652_at;1387511_at;1369157_at;1369136_…	17.99	20.7897	13.3527	11.2446
GO:0009057	5	macromolecule catabolic process	582	615	14	14	14	0.85926	0.21521	0.34783	2.28	290802;312688;298884;311078;298693;298652;303735;680945;305234;310864;81613;25700;171129;83619	Ubxn8;Usp18;Gen1;Psmd14;Isg15;Ube4b;Rnf213;Sdf2l1;Stbd1;Manba;Ceacam1;Ide;Uggt1;Nfe2l2	1397349_at;1389034_at;1384102_at;1386073_at;1382314_at;1374507_at,1376862_at;1374337_at;1373043_at;1372602_at;1371875_at;1374620_at,1382975_at;1387652_at;1368953_at;1367826_at		22.603	23.4682	3.99879	13.3209	20.8202	12.3764	13.5928	16.5962	0.0301446	9.0586	12.4063	8.78671	42.62	39.5606	14.9498	23.5827	38.9508	20.2775					3.99879;5.23919;33.6809;39.2949;29.9319;21.3806;29.6021;46.4701;6.36817;20.1872;30.432450000000003;15.7599;25.5557;8.54018	0.0301446;0.185977;21.1562;25.1873;20.1643;15.41795;19.9907;20.9139;0.255943;14.5745;20.409799999999997;11.7975;17.7745;2.44081	14.9498;15.8255;75.2628;92.2647;57.2437;34.380399999999995;56.2131;49.2709;18.8269;32.2173;59.101;23.2687;44.7408;23.1149	15	1	13	290802;312688;311078;298693;298652;303735;680945;305234;310864;81613;25700;171129;83619	1397349_at;1389034_at;1386073_at;1382314_at;1374507_at,1376862_at;1374337_at;1373043_at;1372602_at;1371875_at;1374620_at,1382975_at;1387652_at;1368953_at;1367826_at	21.7509	21.3806	13.4618	13.011
GO:0009058	3	biosynthetic process	2145	2333	40	40	40	0.41479	0.65164	0.79616	1.71	688283;307395;288985;298490;299857;116548;171402;25315;171400;24297;25627;24539;297783;363017;311021;364070;362676;360481;309957;363465;294400;192281;58919;117514;29199;246074;24296;24913;25357;29516;25690;29200;25426;24651;81813;25080;24311;65155;83472;83619	Afmid;Ablim3;Insig2;Ppcs;Shmt2;Pcsk5;Elovl6;Ephx1;Elovl5;Cyp1a2;Cma1;Lpl;Mybl1;Taf1d;Nmi;Iars2;Fam213b;Dnaja3;Mef2a;Pir;Nus1;Oas1a;Ccnd1;Txnip;Hfe;Scd1;Cyp1a1;Pla2g16;Thrsp;Pde3b;Ahr;Inhba;Cyp1b1;Pklr;Klf10;Apoa4;Ddc;Alas1;Ugdh;Nfe2l2	1396300_at,1396301_x_at;1390255_at;1389377_at,1393690_at;1388756_at;1388695_at;1392773_at;1388108_at;1387669_a_at;1387630_at;1387243_at;1387173_at;1386965_at;1385132_at;1385109_at;1381875_at;1380561_at;1379367_at;1378392_at;1378360_at;1377662_at;1392522_at;1371152_a_at;1371150_at,1371643_at,1383075_at;1371131_a_at;1370772_a_at;1370355_at;1370269_at;1370202_at;1371400_at;1369157_at;1369146_a_at;13…	116548(-0.2018);363017(-0.3027);294400(0.1633)	20.5953	21.6794	0.0171458	13.9867	19.0772	13.5576	13.1525	15.4903	2.85172e-09	9.87181	12.445	9.50722	1.26254e+06	45.1056	0.117549	5.51569e+06	2.55591e+06	7.64225e+06					31.613799999999998;0.269704;18.81295;18.8759;7.86658;24.5208;9.61605;8.09437;35.3004;6.06621;0.01714575;36.9287;30.3994;48.7874;0.230619;16.8616;48.0248;31.2133;33.9069;17.8188;24.3346;28.5593;15.557466666666665;28.4676;35.2166;28.83;0.140946;6.36787;37.6874;27.3061;0.487373;38.44015;27.2489;23.027;31.0897;0.44934;9.66871;6.83525;20.3319;8.54018	21.33885;0.064511;13.64725;13.7458;2.76025;17.1812;2.85924;2.7845;22.8512;0.185991;2.85172E-9;23.617;20.4086;31.8194;0.0445238;12.6203;29.3052;20.8292;21.8155;13.0639;17.0734;19.4349;11.556399999999998;19.3855;22.8112;20.5359;0.0512492;0.0860943;24.9041;19.0667;0.0641274;24.11155;18.7215;16.181649999999998;20.7657;0.0892025;0.0550111;3.02426;14.7989;2.44081	61.50750000000001;14.6268;29.77735;29.5271;20.2174;42.1138;27.9604;20.9633;76.5826;16.8801;0.1175485;83.6043;58.7317;58.59;2.5E7;24.9819;50.2806;61.4029;72.9728;27.4474;41.6531;53.0563;23.282066666666665;52.7858;76.2381;49.6939;13.316;29.194;81.9872;48.0975;2.5E7;53.34895;49.2941;39.02565;60.9906;500000.0;31.8289;16.0192;32.0222;23.1149	32	14	30	688283;288985;298490;299857;116548;171402;25315;171400;24297;24539;297783;311021;364070;362676;360481;363465;294400;192281;29199;246074;24296;25357;29516;25690;25426;25080;24311;65155;83472;83619	1396300_at,1396301_x_at;1389377_at,1393690_at;1388756_at;1388695_at;1392773_at;1388108_at;1387669_a_at;1387630_at;1387243_at;1386965_at;1385132_at;1381875_at;1380561_at;1379367_at;1378392_at;1377662_at;1392522_at;1371152_a_at;1370772_a_at;1370355_at;1370269_at;1371400_at;1369157_at;1369146_a_at;1368990_at;1368520_at;1368064_a_at;1367982_at;1367938_at;1367826_at	19.9294	19.6039	13.2396	12.6771
GO:0009059	5	macromolecule biosynthetic process	1323	1463	18	18	18	0.04732	0.97156	0.093246	1.23	307395;116548;25627;297783;363017;311021;364070;360481;309957;363465;58919;117514;25357;25690;29200;81813;83472;83619	Ablim3;Pcsk5;Cma1;Mybl1;Taf1d;Nmi;Iars2;Dnaja3;Mef2a;Pir;Ccnd1;Txnip;Thrsp;Ahr;Inhba;Klf10;Ugdh;Nfe2l2	1390255_at;1392773_at;1387173_at;1385132_at;1385109_at;1381875_at;1380561_at;1378392_at;1378360_at;1377662_at;1371150_at,1371643_at,1383075_at;1371131_a_at;1371400_at;1369146_a_at;1369012_at,1383486_at;1368650_at;1367938_at;1367826_at	116548(-0.2018);363017(-0.3027)	21.3682	22.4263	0.0171458	14.9829	17.6681	13.712	14.2152	15.9901	2.85172e-09	9.98144	11.8843	9.35785	2.77782e+06	53.0674	0.117549	8.08451e+06	5.29547e+06	1.0511e+07					0.269704;24.5208;0.01714575;30.3994;48.7874;0.230619;16.8616;31.2133;33.9069;17.8188;15.557466666666665;28.4676;37.6874;0.487373;38.44015;31.0897;20.3319;8.54018	0.064511;17.1812;2.85172E-9;20.4086;31.8194;0.0445238;12.6203;20.8292;21.8155;13.0639;11.556399999999998;19.3855;24.9041;0.0641274;24.11155;20.7657;14.7989;2.44081	14.6268;42.1138;0.1175485;58.7317;58.59;2.5E7;24.9819;61.4029;72.9728;27.4474;23.282066666666665;52.7858;81.9872;2.5E7;53.34895;60.9906;32.0222;23.1149	10	11	10	116548;297783;311021;364070;360481;363465;25357;25690;83472;83619	1392773_at;1385132_at;1381875_at;1380561_at;1378392_at;1377662_at;1371400_at;1369146_a_at;1367938_at;1367826_at	18.8091	19.0754	12.7828	12.6356
GO:0009063	6	cellular amino acid catabolic process	86	89	2	2	2	0.78566	0.47628	0.67488	2.25	688283;363285	Afmid;Scly	1396300_at,1396301_x_at;1374524_at		26.8452	26.8452	22.0766	6.74382	26.0709	6.65433	18.5373	18.5373	15.7357	3.96203	18.0824	3.90945	48.9183	48.9183	36.3291	17.8038	46.8742	17.5676					31.613799999999998;22.0766	21.33885;15.7357	61.50750000000001;36.3291	3	0	2	688283;363285	1396300_at,1396301_x_at;1374524_at	26.8452	26.8452	6.74382	18.5373
GO:0009069	8	serine family amino acid metabolic process	36	36	3	3	3	0.99621	0.026322	0.026322	8.33	299857;58819;363285	Shmt2;Txnrd1;Scly	1388695_at;1386958_at;1374524_at		17.2024	21.6641	7.86658	8.08771	16.3248	8.52689	11.3879	15.6676	2.76025	7.4718	10.4933	7.79541	30.4181	34.7079	20.2174	8.87121	29.7714	9.63718	0.5	14.7653			7.86658;21.6641;22.0766	2.76025;15.6676;15.7357	20.2174;34.7079;36.3291	3	0	3	299857;58819;363285	1388695_at;1386958_at;1374524_at	17.2024	21.6641	8.08771	11.3879
GO:0009070	8	serine family amino acid biosynthetic process	14	14	1	1	1	0.97471	0.22393	0.22393	7.14	299857	Shmt2	1388695_at		7.86658	7.86658	7.86658		7.86658		2.76025	2.76025	2.76025		2.76025		20.2174	20.2174	20.2174		20.2174		0	7.86658			7.86658	2.76025	20.2174	1	0	1	299857	1388695_at	7.86658	7.86658		2.76025
GO:0009071	8	serine family amino acid catabolic process	12	12	1	1	1	0.98122	0.19529	0.19529	8.33	363285	Scly	1374524_at		22.0766	22.0766	22.0766		22.0766		15.7357	15.7357	15.7357		15.7357		36.3291	36.3291	36.3291		36.3291		0	22.0766			22.0766	15.7357	36.3291	1	0	1	363285	1374524_at	22.0766	22.0766		15.7357
GO:0009072	6	aromatic amino acid family metabolic process	27	28	1	1	1	0.91069	0.39788	0.39788	3.57	688283	Afmid	1396300_at,1396301_x_at		31.6138	31.6138	31.6138		31.6138		21.3389	21.3389	21.3389		21.3389		61.5075	61.5075	61.5075		61.5075						31.6138	21.3389	61.5075	2	0	1	688283	1396300_at,1396301_x_at	31.6138	31.6138		21.3389
GO:0009074	6	aromatic amino acid family catabolic process	18	18	1	1	1	0.95942	0.27819	0.27819	5.56	688283	Afmid	1396300_at,1396301_x_at		31.6138	31.6138	31.6138		31.6138		21.3389	21.3389	21.3389		21.3389		61.5075	61.5075	61.5075		61.5075		0	31.6138			31.6138	21.3389	61.5075	2	0	1	688283	1396300_at,1396301_x_at	31.6138	31.6138		21.3389
GO:0009100	5	glycoprotein metabolic process	81	81	1	1	1	0.57188	0.77023	1	1.23	310864	Manba	1371875_at		20.1872	20.1872	20.1872		20.1872		14.5745	14.5745	14.5745		14.5745		32.2173	32.2173	32.2173		32.2173						20.1872	14.5745	32.2173	1	0	1	310864	1371875_at	20.1872	20.1872		14.5745
GO:0009108	6	coenzyme biosynthetic process	120	129	3	3	3	0.79857	0.40875	0.50443	2.33	688283;298490;24651	Afmid;Ppcs;Pklr	1396300_at,1396301_x_at;1388756_at;1368651_at,1387263_at		24.5056	23.027	18.8759	6.49639	25.6852	6.1834	17.0888	16.1816	13.7458	3.87695	17.7887	3.69638	43.3534	39.0256	29.5271	16.4236	46.2374	15.7808					31.613799999999998;18.8759;23.027	21.33885;13.7458;16.181649999999998	61.50750000000001;29.5271;39.02565	3	2	2	688283;298490	1396300_at,1396301_x_at;1388756_at	25.2448	25.2448	9.00706	17.5423
GO:0009117	6	nucleotide metabolic process	377	398	8	8	8	0.71381	0.42237	0.69921	2.01	688283;298490;64305;58819;314312;192281;29516;24651	Afmid;Ppcs;Sult1b1;Txnrd1;Entpd5;Oas1a;Pde3b;Pklr	1396300_at,1396301_x_at;1388756_at;1387314_at;1386958_at;1372774_at,1382434_at,1382544_at;1371152_a_at;1369157_at;1368651_at,1387263_at		25.8485	25.1666	18.8759	5.59622	27.6779	5.66882	17.6108	17.6242	12.8709	3.53078	18.5482	3.72436	47.6548	44.563	29.5271	14.8575	53.0716	15.1782					31.613799999999998;18.8759;34.7354;21.6641;21.006220000000003;28.5593;27.3061;23.027	21.33885;13.7458;22.5803;15.6676;12.870903333333333;19.4349;19.0667;16.181649999999998	61.50750000000001;29.5271;74.2881;34.7079;41.02843333333333;53.0563;48.0975;39.02565	10	2	7	688283;298490;64305;58819;314312;192281;29516	1396300_at,1396301_x_at;1388756_at;1387314_at;1386958_at;1372774_at,1382434_at,1382544_at;1371152_a_at;1369157_at	26.2515	27.3061	5.91785	17.815
GO:0009123	6	nucleoside monophosphate metabolic process	139	153	2	2	2	0.48016	0.76387	1	1.31	314312;24651	Entpd5;Pklr	1372774_at,1382434_at,1382544_at;1368651_at,1387263_at		22.0166	22.0166	21.0062	1.42891	21.8615	1.41197	14.5263	14.5263	12.8709	2.34105	14.2722	2.31331	40.027	40.027	39.0256	1.41618	40.1808	1.3994					21.006220000000003;23.027	12.870903333333333;16.181649999999998	41.02843333333333;39.02565	3	2	1	314312	1372774_at,1382434_at,1382544_at	21.0062	21.0062		12.8709
GO:0009124	7	nucleoside monophosphate biosynthetic process	87	99	1	1	1	0.46711	0.8345	1	1.01	24651	Pklr	1368651_at,1387263_at		23.027	23.027	23.027		23.027		16.1816	16.1816	16.1816		16.1816		39.0256	39.0256	39.0256		39.0256						23.027	16.1816	39.0256	0	2	0
GO:0009126	7	purine nucleoside monophosphate metabolic process	120	133	2	2	2	0.57209	0.69272	1	1.5	314312;24651	Entpd5;Pklr	1372774_at,1382434_at,1382544_at;1368651_at,1387263_at		22.0166	22.0166	21.0062	1.42891	21.8615	1.41197	14.5263	14.5263	12.8709	2.34105	14.2722	2.31331	40.027	40.027	39.0256	1.41618	40.1808	1.3994					21.006220000000003;23.027	12.870903333333333;16.181649999999998	41.02843333333333;39.02565	3	2	1	314312	1372774_at,1382434_at,1382544_at	21.0062	21.0062		12.8709
GO:0009127	8	purine nucleoside monophosphate biosynthetic process	70	81	1	1	1	0.57188	0.77023	1	1.23	24651	Pklr	1368651_at,1387263_at		23.027	23.027	23.027		23.027		16.1816	16.1816	16.1816		16.1816		39.0256	39.0256	39.0256		39.0256						23.027	16.1816	39.0256	0	2	0
GO:0009132	6	nucleoside diphosphate metabolic process	63	67	1	1	1	0.66118	0.70353	1	1.49	24651	Pklr	1368651_at,1387263_at		23.027	23.027	23.027		23.027		16.1816	16.1816	16.1816		16.1816		39.0256	39.0256	39.0256		39.0256						23.027	16.1816	39.0256	0	2	0
GO:0009135	7	purine nucleoside diphosphate metabolic process	45	48	1	1	1	0.78733	0.5812	0.5812	2.08	24651	Pklr	1368651_at,1387263_at		23.027	23.027	23.027		23.027		16.1816	16.1816	16.1816		16.1816		39.0256	39.0256	39.0256		39.0256						23.027	16.1816	39.0256	0	2	0
GO:0009141	6	nucleoside triphosphate metabolic process	135	147	2	2	2	0.50695	0.74417	1	1.36	314312;24651	Entpd5;Pklr	1372774_at,1382434_at,1382544_at;1368651_at,1387263_at		22.0166	22.0166	21.0062	1.42891	21.8615	1.41197	14.5263	14.5263	12.8709	2.34105	14.2722	2.31331	40.027	40.027	39.0256	1.41618	40.1808	1.3994					21.006220000000003;23.027	12.870903333333333;16.181649999999998	41.02843333333333;39.02565	3	2	1	314312	1372774_at,1382434_at,1382544_at	21.0062	21.0062		12.8709
GO:0009142	7	nucleoside triphosphate biosynthetic process	75	83	1	1	1	0.55962	0.77845	1	1.2	24651	Pklr	1368651_at,1387263_at		23.027	23.027	23.027		23.027		16.1816	16.1816	16.1816		16.1816		39.0256	39.0256	39.0256		39.0256						23.027	16.1816	39.0256	0	2	0
GO:0009144	7	purine nucleoside triphosphate metabolic process	117	129	2	2	2	0.59125	0.67654	1	1.55	314312;24651	Entpd5;Pklr	1372774_at,1382434_at,1382544_at;1368651_at,1387263_at		22.0166	22.0166	21.0062	1.42891	21.8615	1.41197	14.5263	14.5263	12.8709	2.34105	14.2722	2.31331	40.027	40.027	39.0256	1.41618	40.1808	1.3994					21.006220000000003;23.027	12.870903333333333;16.181649999999998	41.02843333333333;39.02565	3	2	1	314312	1372774_at,1382434_at,1382544_at	21.0062	21.0062		12.8709
GO:0009145	8	purine nucleoside triphosphate biosynthetic process	59	67	1	1	1	0.66118	0.70353	1	1.49	24651	Pklr	1368651_at,1387263_at		23.027	23.027	23.027		23.027		16.1816	16.1816	16.1816		16.1816		39.0256	39.0256	39.0256		39.0256						23.027	16.1816	39.0256	0	2	0
GO:0009150	7	purine ribonucleotide metabolic process	268	286	5	5	5	0.5928	0.58588	1	1.75	298490;64305;314312;29516;24651	Ppcs;Sult1b1;Entpd5;Pde3b;Pklr	1388756_at;1387314_at;1372774_at,1382434_at,1382544_at;1369157_at;1368651_at,1387263_at		24.9901	23.027	18.8759	6.27382	27.082	6.37141	16.8891	16.1816	12.8709	3.98931	18.0818	4.15735	46.3934	41.0284	29.5271	16.9452	52.0629	17.3144					18.8759;34.7354;21.006220000000003;27.3061;23.027	13.7458;22.5803;12.870903333333333;19.0667;16.181649999999998	29.5271;74.2881;41.02843333333333;48.0975;39.02565	6	2	4	298490;64305;314312;29516	1388756_at;1387314_at;1372774_at,1382434_at,1382544_at;1369157_at	25.4809	24.1562	7.13269	17.0659
GO:0009152	8	purine ribonucleotide biosynthetic process	136	148	2	2	2	0.50244	0.74755	1	1.35	298490;24651	Ppcs;Pklr	1388756_at;1368651_at,1387263_at		20.9515	20.9515	18.8759	2.93527	21.757	2.70519	14.9637	14.9637	13.7458	1.72241	15.4364	1.5874	34.2764	34.2764	29.5271	6.71649	36.1196	6.19003					18.8759;23.027	13.7458;16.181649999999998	29.5271;39.02565	1	2	1	298490	1388756_at	18.8759	18.8759		13.7458
GO:0009154	8	purine ribonucleotide catabolic process	27	29	1	1	1	0.90517	0.40871	0.40871	3.45	29516	Pde3b	1369157_at		27.3061	27.3061	27.3061		27.3061		19.0667	19.0667	19.0667		19.0667		48.0975	48.0975	48.0975		48.0975						27.3061	19.0667	48.0975	1	0	1	29516	1369157_at	27.3061	27.3061		19.0667
GO:0009156	8	ribonucleoside monophosphate biosynthetic process	76	88	1	1	1	0.52961	0.79774	1	1.14	24651	Pklr	1368651_at,1387263_at		23.027	23.027	23.027		23.027		16.1816	16.1816	16.1816		16.1816		39.0256	39.0256	39.0256		39.0256						23.027	16.1816	39.0256	0	2	0
GO:0009161	7	ribonucleoside monophosphate metabolic process	126	140	2	2	2	0.5391	0.71943	1	1.43	314312;24651	Entpd5;Pklr	1372774_at,1382434_at,1382544_at;1368651_at,1387263_at		22.0166	22.0166	21.0062	1.42891	21.8615	1.41197	14.5263	14.5263	12.8709	2.34105	14.2722	2.31331	40.027	40.027	39.0256	1.41618	40.1808	1.3994					21.006220000000003;23.027	12.870903333333333;16.181649999999998	41.02843333333333;39.02565	3	2	1	314312	1372774_at,1382434_at,1382544_at	21.0062	21.0062		12.8709
GO:0009165	7	nucleotide biosynthetic process	196	211	4	4	4	0.67164	0.52612	0.79249	1.9	688283;298490;192281;24651	Afmid;Ppcs;Oas1a;Pklr	1396300_at,1396301_x_at;1388756_at;1371152_a_at;1368651_at,1387263_at		25.519	25.7932	18.8759	5.67835	26.3526	5.29697	17.6753	17.8083	13.7458	3.37588	18.171	3.15738	45.7791	46.041	29.5271	14.2604	47.8208	13.4542					31.613799999999998;18.8759;28.5593;23.027	21.33885;13.7458;19.4349;16.181649999999998	61.50750000000001;29.5271;53.0563;39.02565	4	2	3	688283;298490;192281	1396300_at,1396301_x_at;1388756_at;1371152_a_at	26.3497	28.5593	6.65022	18.1732
GO:0009166	7	nucleotide catabolic process	71	76	2	2	2	0.84419	0.39688	0.39688	2.63	29516;24651	Pde3b;Pklr	1369157_at;1368651_at,1387263_at		25.1666	25.1666	23.027	3.02578	25.7785	2.89938	17.6242	17.6242	16.1816	2.04004	18.0368	1.95482	43.5616	43.5616	39.0256	6.41477	44.8589	6.1468					27.3061;23.027	19.0667;16.181649999999998	48.0975;39.02565	1	2	1	29516	1369157_at	27.3061	27.3061		19.0667
GO:0009167	8	purine ribonucleoside monophosphate metabolic process	120	133	2	2	2	0.57209	0.69272	1	1.5	314312;24651	Entpd5;Pklr	1372774_at,1382434_at,1382544_at;1368651_at,1387263_at		22.0166	22.0166	21.0062	1.42891	21.8615	1.41197	14.5263	14.5263	12.8709	2.34105	14.2722	2.31331	40.027	40.027	39.0256	1.41618	40.1808	1.3994					21.006220000000003;23.027	12.870903333333333;16.181649999999998	41.02843333333333;39.02565	3	2	1	314312	1372774_at,1382434_at,1382544_at	21.0062	21.0062		12.8709
GO:0009168	9	purine ribonucleoside monophosphate biosynthetic process	70	81	1	1	1	0.57188	0.77023	1	1.23	24651	Pklr	1368651_at,1387263_at		23.027	23.027	23.027		23.027		16.1816	16.1816	16.1816		16.1816		39.0256	39.0256	39.0256		39.0256						23.027	16.1816	39.0256	0	2	0
GO:0009179	8	purine ribonucleoside diphosphate metabolic process	45	48	1	1	1	0.78733	0.5812	0.5812	2.08	24651	Pklr	1368651_at,1387263_at		23.027	23.027	23.027		23.027		16.1816	16.1816	16.1816		16.1816		39.0256	39.0256	39.0256		39.0256						23.027	16.1816	39.0256	0	2	0
GO:0009185	7	ribonucleoside diphosphate metabolic process	48	51	1	1	1	0.76746	0.60342	0.60342	1.96	24651	Pklr	1368651_at,1387263_at		23.027	23.027	23.027		23.027		16.1816	16.1816	16.1816		16.1816		39.0256	39.0256	39.0256		39.0256						23.027	16.1816	39.0256	0	2	0
GO:0009187	7	cyclic nucleotide metabolic process	44	45	1	1	1	0.80701	0.55774	0.55774	2.22	29516	Pde3b	1369157_at		27.3061	27.3061	27.3061		27.3061		19.0667	19.0667	19.0667		19.0667		48.0975	48.0975	48.0975		48.0975						27.3061	19.0667	48.0975	1	0	1	29516	1369157_at	27.3061	27.3061		19.0667
GO:0009199	7	ribonucleoside triphosphate metabolic process	116	128	2	2	2	0.59607	0.67239	1	1.56	314312;24651	Entpd5;Pklr	1372774_at,1382434_at,1382544_at;1368651_at,1387263_at		22.0166	22.0166	21.0062	1.42891	21.8615	1.41197	14.5263	14.5263	12.8709	2.34105	14.2722	2.31331	40.027	40.027	39.0256	1.41618	40.1808	1.3994					21.006220000000003;23.027	12.870903333333333;16.181649999999998	41.02843333333333;39.02565	3	2	1	314312	1372774_at,1382434_at,1382544_at	21.0062	21.0062		12.8709
GO:0009201	8	ribonucleoside triphosphate biosynthetic process	64	72	1	1	1	0.62867	0.72931	1	1.39	24651	Pklr	1368651_at,1387263_at		23.027	23.027	23.027		23.027		16.1816	16.1816	16.1816		16.1816		39.0256	39.0256	39.0256		39.0256						23.027	16.1816	39.0256	0	2	0
GO:0009205	8	purine ribonucleoside triphosphate metabolic process	110	122	2	2	2	0.62521	0.64657	1	1.64	314312;24651	Entpd5;Pklr	1372774_at,1382434_at,1382544_at;1368651_at,1387263_at		22.0166	22.0166	21.0062	1.42891	21.8615	1.41197	14.5263	14.5263	12.8709	2.34105	14.2722	2.31331	40.027	40.027	39.0256	1.41618	40.1808	1.3994					21.006220000000003;23.027	12.870903333333333;16.181649999999998	41.02843333333333;39.02565	3	2	1	314312	1372774_at,1382434_at,1382544_at	21.0062	21.0062		12.8709
GO:0009206	9	purine ribonucleoside triphosphate biosynthetic process	58	66	1	1	1	0.66775	0.69808	1	1.52	24651	Pklr	1368651_at,1387263_at		23.027	23.027	23.027		23.027		16.1816	16.1816	16.1816		16.1816		39.0256	39.0256	39.0256		39.0256						23.027	16.1816	39.0256	0	2	0
GO:0009214	8	cyclic nucleotide catabolic process	13	14	1	1	1	0.97471	0.22393	0.22393	7.14	29516	Pde3b	1369157_at		27.3061	27.3061	27.3061		27.3061		19.0667	19.0667	19.0667		19.0667		48.0975	48.0975	48.0975		48.0975		0	27.3061			27.3061	19.0667	48.0975	1	0	1	29516	1369157_at	27.3061	27.3061		19.0667
GO:0009225	6	nucleotide-sugar metabolic process	27	28	2	2	2	0.9866	0.089309	0.089309	7.14	171129;83472	Uggt1;Ugdh	1368953_at;1367938_at		22.9438	22.9438	20.3319	3.69378	24.1238	3.29532	16.2867	16.2867	14.7989	2.10407	16.9589	1.87709	38.3815	38.3815	32.0222	8.99341	41.2546	8.02325	0.5	22.9438			25.5557;20.3319	17.7745;14.7989	44.7408;32.0222	2	0	2	171129;83472	1368953_at;1367938_at	22.9438	22.9438	3.69378	16.2867
GO:0009226	6	nucleotide-sugar biosynthetic process	15	16	1	1	1	0.96742	0.25155	0.25155	6.25	83472	Ugdh	1367938_at		20.3319	20.3319	20.3319		20.3319		14.7989	14.7989	14.7989		14.7989		32.0222	32.0222	32.0222		32.0222		0	20.3319			20.3319	14.7989	32.0222	1	0	1	83472	1367938_at	20.3319	20.3319		14.7989
GO:0009251	7	glucan catabolic process	9	10	1	1	1	0.98689	0.16561	0.16561	10	305234	Stbd1	1372602_at		6.36817	6.36817	6.36817		6.36817		0.255943	0.255943	0.255943		0.255943		18.8269	18.8269	18.8269		18.8269		0	6.36817	0	6.36817	6.36817	0.255943	18.8269	1	0	1	305234	1372602_at	6.36817	6.36817		0.255943
GO:0009259	7	ribonucleotide metabolic process	280	299	5	5	5	0.55129	0.62531	1	1.67	298490;64305;314312;29516;24651	Ppcs;Sult1b1;Entpd5;Pde3b;Pklr	1388756_at;1387314_at;1372774_at,1382434_at,1382544_at;1369157_at;1368651_at,1387263_at		24.9901	23.027	18.8759	6.27382	27.082	6.37141	16.8891	16.1816	12.8709	3.98931	18.0818	4.15735	46.3934	41.0284	29.5271	16.9452	52.0629	17.3144					18.8759;34.7354;21.006220000000003;27.3061;23.027	13.7458;22.5803;12.870903333333333;19.0667;16.181649999999998	29.5271;74.2881;41.02843333333333;48.0975;39.02565	6	2	4	298490;64305;314312;29516	1388756_at;1387314_at;1372774_at,1382434_at,1382544_at;1369157_at	25.4809	24.1562	7.13269	17.0659
GO:0009260	7	ribonucleotide biosynthetic process	146	159	2	2	2	0.45414	0.78225	1	1.26	298490;24651	Ppcs;Pklr	1388756_at;1368651_at,1387263_at		20.9515	20.9515	18.8759	2.93527	21.757	2.70519	14.9637	14.9637	13.7458	1.72241	15.4364	1.5874	34.2764	34.2764	29.5271	6.71649	36.1196	6.19003					18.8759;23.027	13.7458;16.181649999999998	29.5271;39.02565	1	2	1	298490	1388756_at	18.8759	18.8759		13.7458
GO:0009261	7	ribonucleotide catabolic process	28	30	1	1	1	0.89955	0.41934	0.41934	3.33	29516	Pde3b	1369157_at		27.3061	27.3061	27.3061		27.3061		19.0667	19.0667	19.0667		19.0667		48.0975	48.0975	48.0975		48.0975						27.3061	19.0667	48.0975	1	0	1	29516	1369157_at	27.3061	27.3061		19.0667
GO:0009266	4	response to temperature stimulus	196	205	8	8	8	0.98829	0.031611	0.031611	3.9	245920;24539;360481;309499;291671;60628;24651;25303	Cxcl10;Lpl;Dnaja3;Myof;Hspa9;Cxcr4;Pklr;Abcc2	1387969_at;1386965_at;1378392_at;1375857_at;1389930_at;1389244_x_at;1368651_at,1387263_at;1368497_at		16.9627	19.9082	0.0171458	15.0541	13.8633	15.5778	11.4679	14.2849	2.85172e-09	10.0257	9.2781	10.4337	6.25003e+06	55.2319	0.117549	1.15727e+07	1.19239e+07	1.33488e+07					0.324767;36.9287;31.2133;27.1651;0.01714575;0.235955;23.027;16.7895	0.0408567;23.617;20.8292;18.6754;2.85172E-9;0.0107916;16.181649999999998;12.3882	2.5E7;83.6043;61.4029;49.061;0.1175485;2.5E7;39.02565;25.4932	5	4	5	245920;24539;360481;291671;25303	1387969_at;1386965_at;1378392_at;1389930_at;1368497_at	17.0547	16.7895	17.071	11.3751
GO:0009267	5	cellular response to starvation	142	148	6	6	6	0.9827	0.05046	0.05046	4.05	29199;25697;246097;56759;81813;83619	Hfe;Ctsl;Fas;Rnase4;Klf10;Nfe2l2	1370772_a_at;1370244_at;1397221_s_at;1368943_at;1368650_at;1367826_at		13.7848	8.13383	0.0158072	15.4875	14.8224	14.7017	8.48516	3.64814	6.31202e-05	10.4796	9.16994	10.0705	83363.7	42.0528	4.56418	204109	29479.6	128940					35.2166;0.119104;0.0158072;7.72749;31.0897;8.54018	22.8112;0.0377096;6.31202E-5;4.85547;20.7657;2.44081	76.2381;4.56418;500000.0;17.1691;60.9906;23.1149	4	2	4	29199;25697;246097;83619	1370772_a_at;1370244_at;1397221_s_at;1367826_at	10.9729	4.32964	16.6487	6.32245
GO:0009268	4	response to pH	46	47	1	1	1	0.79391	0.57352	0.57352	2.13	291132	Gpld1	1380833_at		9.29434	9.29434	9.29434		9.29434		4.33067	4.33067	4.33067		4.33067		24.0279	24.0279	24.0279		24.0279						9.29434	4.33067	24.0279	0	1	0
GO:0009306	5	protein secretion	122	127	3	3	3	0.80592	0.39909	0.49834	2.36	116548;100359823;170824	Pcsk5;Tmem167a;Steap3	1392773_at;1376272_s_at;1370374_at	116548(-0.2018)	28.964	29.2859	24.5208	4.29136	28.6815	4.61771	19.4644	19.8232	17.1812	2.12662	19.2936	2.28717	55.788	55.2398	42.1138	13.9564	55.1227	14.9842					24.5208;29.2859;33.0854	17.1812;19.8232;21.3888	42.1138;55.2398;70.0105	2	1	2	116548;100359823	1392773_at;1376272_s_at	26.9033	26.9033	3.36943	18.5022
GO:0009308	5	amine metabolic process	41	43	4	4	4	0.99902	0.007194	0.007194	9.3	688283;360547;24296;25303	Afmid;Sat2;Cyp1a1;Abcc2	1396300_at,1396301_x_at;1374892_at;1370269_at;1368497_at		12.1737	8.46996	0.140946	15.15	10.9158	15.9651	8.45788	6.22071	0.0512492	10.3711	7.47732	10.8748	26.6512	19.4046	6.28806	24.5546	27.2189	24.9963	1.5	8.46996			31.613799999999998;0.150424;0.140946;16.7895	21.33885;0.053226;0.0512492;12.3882	61.50750000000001;6.28806;13.316;25.4932	4	1	3	688283;24296;25303	1396300_at,1396301_x_at;1370269_at;1368497_at	16.1814	16.7895	15.7452	11.2594
GO:0009310	6	amine catabolic process	13	13	1	1	1	0.97807	0.20974	0.20974	7.69	688283	Afmid	1396300_at,1396301_x_at		31.6138	31.6138	31.6138		31.6138		21.3389	21.3389	21.3389		21.3389		61.5075	61.5075	61.5075		61.5075		0	31.6138			31.6138	21.3389	61.5075	2	0	1	688283	1396300_at,1396301_x_at	31.6138	31.6138		21.3389
GO:0009314	4	response to radiation	433	451	7	7	7	0.43654	0.70414	0.8567	1.55	245920;25419;298884;298652;363143;362835;58919	Cxcl10;Crp;Gen1;Ube4b;Gnat1;Reep6;Ccnd1	1387969_at;1387830_at;1384102_at;1374507_at,1376862_at;1373587_at;1372841_at,1384639_at;1371150_at,1371643_at,1383075_at		22.4921	21.3806	0.324767	12.2454	17.9512	14.5372	15.2313	15.4179	0.0408567	7.84916	12.0615	9.52712	3.57147e+06	63.3595	23.2821	9.44909e+06	7.87856e+06	1.25449e+07					0.324767;20.2265;33.6809;21.3806;34.1415;32.13295;15.557466666666665	0.0408567;14.599;21.1562;15.41795;22.2926;21.55585;11.556399999999998	2.5E7;32.2998;75.2628;34.380399999999995;71.9494;63.35945;23.282066666666665	7	4	5	245920;25419;298652;363143;362835	1387969_at;1387830_at;1374507_at,1376862_at;1373587_at;1372841_at,1384639_at	21.6413	21.3806	13.4424	14.7813
GO:0009403	5	toxin biosynthetic process	4	4	1	1	1	0.99812	0.069844	0.069844	25	24297	Cyp1a2	1387243_at		6.06621	6.06621	6.06621		6.06621		0.185991	0.185991	0.185991		0.185991		16.8801	16.8801	16.8801		16.8801		0	6.06621	0	6.06621	6.06621	0.185991	16.8801	1	0	1	24297	1387243_at	6.06621	6.06621		0.185991
GO:0009404	4	toxin metabolic process	22	25	6	6	6	1	4.1498e-06	4.1498e-06	24	24297;494500;24296;25426;24311;83619	Cyp1a2;Gsta3;Cyp1a1;Cyp1b1;Ddc;Nfe2l2	1387243_at;1371089_at;1370269_at;1368990_at;1368064_a_at;1367826_at		12.7185	9.10445	0.140946	10.7945	13.3707	12.1855	6.45138	1.3134	0.0512492	8.99401	7.61085	9.46357	29.4767	27.4719	13.316	14.3267	30.4023	16.4961	0.5	3.10358	1.5	7.30319	6.06621;24.6462;0.140946;27.2489;9.66871;8.54018	0.185991;17.2537;0.0512492;18.7215;0.0550111;2.44081	16.8801;42.4262;13.316;49.2941;31.8289;23.1149	6	0	6	24297;494500;24296;25426;24311;83619	1387243_at;1371089_at;1370269_at;1368990_at;1368064_a_at;1367826_at	12.7185	9.10445	10.7945	6.45138
GO:0009407	4	toxin catabolic process	4	6	2	2	2	0.99989	0.0045813	0.0045813	33.33	494500;83619	Gsta3;Nfe2l2	1371089_at;1367826_at		16.5932	16.5932	8.54018	11.3887	11.3939	8.69688	9.84725	9.84725	2.44081	10.4743	5.06537	7.99862	32.7706	32.7706	23.1149	13.6552	26.5365	10.4277	0	8.54018	0	8.54018	24.6462;8.54018	17.2537;2.44081	42.4262;23.1149	2	0	2	494500;83619	1371089_at;1367826_at	16.5932	16.5932	11.3887	9.84725
GO:0009408	4	response to heat	122	127	6	6	6	0.99209	0.026822	0.026822	4.72	245920;360481;309499;291671;24651;25303	Cxcl10;Dnaja3;Myof;Hspa9;Pklr;Abcc2	1387969_at;1378392_at;1375857_at;1389930_at;1368651_at,1387263_at;1368497_at		16.4228	19.9082	0.0171458	13.4625	13.2604	14.0983	11.3526	14.2849	2.85172e-09	9.21584	9.08954	9.75299	4.1667e+06	44.0433	0.117549	1.02062e+07	1.08237e+07	1.35694e+07					0.324767;31.2133;27.1651;0.01714575;23.027;16.7895	0.0408567;20.8292;18.6754;2.85172E-9;16.181649999999998;12.3882	2.5E7;61.4029;49.061;0.1175485;39.02565;25.4932	4	3	4	245920;360481;291671;25303	1387969_at;1378392_at;1389930_at;1368497_at	12.0862	8.55713	14.9662	8.31456
GO:0009409	4	response to cold	56	61	2	2	2	0.90371	0.29918	0.29918	3.28	245920;24539	Cxcl10;Lpl	1387969_at;1386965_at		18.6267	18.6267	0.324767	25.8829	10.4006	23.1211	11.8289	11.8289	0.0408567	16.6709	6.53059	14.892	1.25e+07	1.25e+07	83.6043	1.76776e+07	1.81183e+07	1.57914e+07					0.324767;36.9287	0.0408567;23.617	2.5E7;83.6043	2	0	2	245920;24539	1387969_at;1386965_at	18.6267	18.6267	25.8829	11.8289
GO:0009410	4	response to xenobiotic stimulus	258	273	8	8	8	0.94221	0.11857	0.15986	2.93	170913;171352;294270;60628;24536;25690;25426;25303	Abcb1a;Cyp3a9;RT1-Db1;Cxcr4;Lepr;Ahr;Cyp1b1;Abcc2	1370464_at,1370465_at;1370387_at;1370382_at,1370383_s_at;1389244_x_at;1370604_at,1370605_s_at,1371223_a_at,1388232_a_at;1369146_a_at;1368990_at;1368497_at	24536(-0.2274)	11.5251	9.53848	0.235955	11.1341	9.76243	11.4498	7.16939	4.0618	0.0107916	8.04014	5.73701	8.04305	7.07815e+06	125036	10.0651	1.12751e+07	1.00181e+07	1.22978e+07					2.461988;25.9004;4.6979455;0.235955;14.379010000000001;0.487373;27.2489;16.7895	0.077203;17.9697;2.6781043;0.0107916;5.44549525;0.0641274;18.7215;12.3882	10.065059999999999;45.6414;250023.52665;2.5E7;6375024.07585;2.5E7;49.2941;25.4932	8	5	6	170913;171352;294270;25690;25426;25303	1370464_at,1370465_at;1370387_at;1370382_at,1370383_s_at;1369146_a_at;1368990_at;1368497_at	12.931	10.7437	12.0027	8.64981
GO:0009411	6	response to UV	126	132	3	3	3	0.78739	0.42314	0.51372	2.27	298884;298652;58919	Gen1;Ube4b;Ccnd1	1384102_at;1374507_at,1376862_at;1371150_at,1371643_at,1383075_at		23.5397	21.3806	15.5575	9.25261	24.5669	9.45933	16.0435	15.4179	11.5564	4.83038	16.5723	4.90576	44.3084	34.3804	23.2821	27.3756	47.3655	28.1849					33.6809;21.3806;15.557466666666665	21.1562;15.41795;11.556399999999998	75.2628;34.380399999999995;23.282066666666665	2	4	1	298652	1374507_at,1376862_at	21.3806	21.3806		15.4179
GO:0009415	4	response to water	26	27	1	1	1	0.91611	0.38686	0.38686	3.7	246097	Fas	1397221_s_at		0.0158072	0.0158072	0.0158072		0.0158072		6.31202e-05	6.31202e-05	6.31202e-05		6.31202e-05		500000	500000	500000		500000						0.0158072	6.31202e-05	500000	1	0	1	246097	1397221_s_at	0.0158072	0.0158072		6.31202e-05
GO:0009416	5	response to light stimulus	275	284	5	5	5	0.59922	0.57962	1	1.76	298884;298652;363143;362835;58919	Gen1;Ube4b;Gnat1;Reep6;Ccnd1	1384102_at;1374507_at,1376862_at;1373587_at;1372841_at,1384639_at;1371150_at,1371643_at,1383075_at		27.3787	32.133	15.5575	8.42281	26.6143	8.47693	18.3958	21.1562	11.5564	4.70201	17.8761	4.62971	53.6468	63.3595	23.2821	23.3976	52.0251	24.1338					33.6809;21.3806;34.1415;32.13295;15.557466666666665	21.1562;15.41795;22.2926;21.55585;11.556399999999998	75.2628;34.380399999999995;71.9494;63.35945;23.282066666666665	5	4	3	298652;363143;362835	1374507_at,1376862_at;1373587_at;1372841_at,1384639_at	29.2184	32.133	6.86158	19.7555
GO:0009435	9	NAD biosynthetic process	16	18	1	1	1	0.95942	0.27819	0.27819	5.56	688283	Afmid	1396300_at,1396301_x_at		31.6138	31.6138	31.6138		31.6138		21.3389	21.3389	21.3389		21.3389		61.5075	61.5075	61.5075		61.5075		0	31.6138			31.6138	21.3389	61.5075	2	0	1	688283	1396300_at,1396301_x_at	31.6138	31.6138		21.3389
GO:0009437	5	carnitine metabolic process	13	13	1	1	1	0.97807	0.20974	0.20974	7.69	29441	Por	1368213_at,1387109_at		15.4996	15.4996	15.4996		15.4996		9.02697	9.02697	9.02697		9.02697		30.4732	30.4732	30.4732		30.4732		0	15.4996			15.4996	9.02697	30.4732	2	0	1	29441	1368213_at,1387109_at	15.4996	15.4996		9.02697
GO:0009445	7	putrescine metabolic process	6	6	1	1	1	0.99542	0.10292	0.10292	16.67	360547	Sat2	1374892_at		0.150424	0.150424	0.150424		0.150424		0.053226	0.053226	0.053226		0.053226		6.28806	6.28806	6.28806		6.28806		0	0.150424	0	0.150424	0.150424	0.053226	6.28806	0	1	0
GO:0009581	4	detection of external stimulus	95	96	3	3	3	0.90603	0.24757	0.24757	3.12	363143;362835;60628	Gnat1;Reep6;Cxcr4	1373587_at;1372841_at,1384639_at;1389244_x_at		22.1701	32.133	0.235955	19.0221	15.8065	19.9058	14.6197	21.5558	0.0107916	12.6571	10.4375	13.3225	8.33338e+06	71.9494	63.3595	1.44337e+07	1.30262e+07	1.52957e+07					34.1415;32.13295;0.235955	22.2926;21.55585;0.0107916	71.9494;63.35945;2.5E7	3	1	2	363143;362835	1373587_at;1372841_at,1384639_at	33.1372	33.1372	1.42026	21.9242
GO:0009582	4	detection of abiotic stimulus	94	95	3	3	3	0.90873	0.24277	0.24277	3.16	363143;362835;60628	Gnat1;Reep6;Cxcr4	1373587_at;1372841_at,1384639_at;1389244_x_at		22.1701	32.133	0.235955	19.0221	15.8065	19.9058	14.6197	21.5558	0.0107916	12.6571	10.4375	13.3225	8.33338e+06	71.9494	63.3595	1.44337e+07	1.30262e+07	1.52957e+07					34.1415;32.13295;0.235955	22.2926;21.55585;0.0107916	71.9494;63.35945;2.5E7	3	1	2	363143;362835	1373587_at;1372841_at,1384639_at	33.1372	33.1372	1.42026	21.9242
GO:0009583	5	detection of light stimulus	34	34	2	2	2	0.97736	0.12377	0.12377	5.88	363143;362835	Gnat1;Reep6	1373587_at;1372841_at,1384639_at		33.1372	33.1372	32.133	1.42026	32.7455	1.30778	21.9242	21.9242	21.5558	0.520961	21.7805	0.479703	67.6544	67.6544	63.3595	6.07401	65.9793	5.59298	0.5	33.1372			34.1415;32.13295	22.2926;21.55585	71.9494;63.35945	3	0	2	363143;362835	1373587_at;1372841_at,1384639_at	33.1372	33.1372	1.42026	21.9242
GO:0009584	6	detection of visible light	19	19	2	2	2	0.99554	0.044829	0.044829	10.53	363143;362835	Gnat1;Reep6	1373587_at;1372841_at,1384639_at		33.1372	33.1372	32.133	1.42026	32.7455	1.30778	21.9242	21.9242	21.5558	0.520961	21.7805	0.479703	67.6544	67.6544	63.3595	6.07401	65.9793	5.59298	0	32.133	0.5	33.1372	34.1415;32.13295	22.2926;21.55585	71.9494;63.35945	3	0	2	363143;362835	1373587_at;1372841_at,1384639_at	33.1372	33.1372	1.42026	21.9242
GO:0009593	4	detection of chemical stimulus	62	90	2	2	2	0.78097	0.48212	0.67714	2.22	360733;363143	Rtp4;Gnat1	1379285_at;1373587_at		17.2169	17.2169	0.292383	23.9349	8.01597	20.0889	11.1721	11.1721	0.0515247	15.7268	5.12642	13.1997	1.25e+07	1.25e+07	71.9494	1.76776e+07	1.92956e+07	1.48371e+07					0.292383;34.1415	0.0515247;22.2926	2.5E7;71.9494	2	0	2	360733;363143	1379285_at;1373587_at	17.2169	17.2169	23.9349	11.1721
GO:0009595	4	detection of biotic stimulus	14	16	1	1	1	0.96742	0.25155	0.25155	6.25	294270	RT1-Db1	1370382_at,1370383_s_at		4.69795	4.69795	4.69795		4.69795		2.6781	2.6781	2.6781		2.6781		250024	250024	250024		250024		0	4.69795			4.69795	2.6781	250024	2	0	1	294270	1370382_at,1370383_s_at	4.69795	4.69795		2.6781
GO:0009597	6	detection of virus	4	4	1	1	1	0.99812	0.069844	0.069844	25	297989	Ddx58	1391463_at		19.5705	19.5705	19.5705		19.5705		14.1871	14.1871	14.1871		14.1871		30.9363	30.9363	30.9363		30.9363		0	19.5705	0	19.5705	19.5705	14.1871	30.9363	1	0	1	297989	1391463_at	19.5705	19.5705		14.1871
GO:0009605	3	response to external stimulus	1374	1450	51	51	51	1	1.4977e-06	2.4007e-06	3.52	308097;316010;297989;266766;245920;266685;24314;24297;25642;170496;303538;89843;298693;360733;299269;363143;362835;296654;192281;58919;81806;117514;81750;29199;286954;291671;170913;294270;246074;24296;25697;60628;59295;246097;24536;25476;140668;116686;25426;56759;24614;24651;81813;25080;25303;29441;65155;81707;83619;64045;24484	Tagap;Camp;Ddx58;Rcan1;Cxcl10;Ugt2b17;Nqo1;Cyp1a2;Cyp3a23/3a1;Lcn2;Dhx58;Cxadr;Isg15;Rtp4;Ifi27l2b;Gnat1;Reep6;Gsn;Oas1a;Ccnd1;Serpina7;Txnip;Pros1;Hfe;Ugt2b1;Hspa9;Abcb1a;RT1-Db1;Scd1;Cyp1a1;Ctsl;Cxcr4;Nucb2;Fas;Lepr;Lgals9;Abcc3;Gsr;Cyp1b1;Rnase4;Orm1;Pklr;Klf10;Apoa4;Abcc2;Por;Alas1;Mmp14;Nfe2l2;Glrx;Igfbp3	1397958_at;1393603_at;1391463_at;1388686_at;1387969_at;1387955_at;1387599_a_at;1387243_at;1387118_at;1387011_at;1385276_a_at;1384816_at;1382314_at;1379285_at;1376845_at;1373587_at;1372841_at,1384639_at;1371414_at;1371152_a_at;1371150_at,1371643_at,1383075_at;1371143_at;1371131_a_at;1371037_at;1370772_a_at;1370698_at;1389930_at;1370464_at,1370465_at;1370382_at,1370383_s_at;1370355_at;1370269_at;13…	24536(-0.2274)	17.3154	15.624	0.0158072	14.5058	16.8407	14.6167	10.9526	11.5564	2.85172e-09	9.76314	10.7722	9.7779	2.11033e+06	49.603	0.117549	6.80305e+06	3.03108e+06	8.02373e+06					35.1155;30.0616;19.5705;0.324769;0.324767;0.0619393;8.72415;6.06621;1.75171;39.4681;32.0559;22.8164;29.9319;0.292383;0.254908;34.1415;32.13295;0.530685;28.5593;15.557466666666665;34.2065;28.4676;23.6793;35.2166;0.0904144;0.01714575;2.461988;4.6979455;28.83;0.140946;0.119104;0.235955;25.1917;0.0158072;14.379010000000001;36.5565;7.57916;28.7171;27.2489;7.72749;47.8233;23.027;31.0897;0.44934;16.7895…	22.1522;20.2323;14.1871;0.0517397;0.0408567;0.0254314;3.19261;0.185991;0.0435876;25.4163;21.2581;16.18;20.1643;0.0515247;0.0620163;22.2926;21.55585;0.0822551;19.4349;11.556399999999998;22.0522;19.3855;16.6907;22.8112;0.0374753;2.85172E-9;0.077203;2.6781043;20.5359;0.0512492;0.0377096;0.0107916;17.8142;6.31202E-5;5.44549525;23.4439;0.120481;19.5196;18.7215;4.85547;25.5109;16.181649999999998;20.765…	79.2566;57.6531;30.9363;2.5E7;2.5E7;0.270322;22.2679;16.8801;14.034;92.3515;64.2812;38.0215;57.2437;2.5E7;14.39;71.9494;63.35945;21.0222;53.0563;23.282066666666665;73.6665;52.7858;40.0585;76.2381;0.594918;0.1175485;10.065059999999999;250023.52665;49.6939;13.316;4.56418;2.5E7;42.7872;500000.0;6375024.07585;81.9429;21.1976;53.5243;49.2941;17.1691;49.603;39.02565;60.9906;500000.0;25.4932;30.4732;16.…	43	19	38	297989;266766;245920;266685;24314;24297;25642;170496;303538;89843;298693;360733;299269;363143;362835;192281;81750;29199;286954;291671;170913;294270;246074;24296;25697;59295;246097;25476;140668;116686;25426;24614;25080;25303;29441;65155;83619;64045	1391463_at;1388686_at;1387969_at;1387955_at;1387599_a_at;1387243_at;1387118_at;1387011_at;1385276_a_at;1384816_at;1382314_at;1379285_at;1376845_at;1373587_at;1372841_at,1384639_at;1371152_a_at;1371037_at;1370772_a_at;1370698_at;1389930_at;1370464_at,1370465_at;1370382_at,1370383_s_at;1370355_at;1370269_at;1370244_at;1370000_at;1397221_s_at;1387027_a_at;1369698_at;1369061_at;1368990_at;1368731_at;…	15.4895	12.1119	14.5443	9.70825
GO:0009607	3	response to biotic stimulus	666	716	27	27	27	0.99992	0.0002039	0.0002278	3.77	308097;316010;297989;245920;266685;24297;170496;303538;89843;298693;360733;299269;192281;117514;81750;286954;170913;294270;246074;24296;246097;25476;140668;24614;24651;25303;24484	Tagap;Camp;Ddx58;Cxcl10;Ugt2b17;Cyp1a2;Lcn2;Dhx58;Cxadr;Isg15;Rtp4;Ifi27l2b;Oas1a;Txnip;Pros1;Ugt2b1;Abcb1a;RT1-Db1;Scd1;Cyp1a1;Fas;Lgals9;Abcc3;Orm1;Pklr;Abcc2;Igfbp3	1397958_at;1393603_at;1391463_at;1387969_at;1387955_at;1387243_at;1387011_at;1385276_a_at;1384816_at;1382314_at;1379285_at;1376845_at;1371152_a_at;1371131_a_at;1371037_at;1370698_at;1370464_at,1370465_at;1370382_at,1370383_s_at;1370355_at;1370269_at;1397221_s_at;1387027_a_at;1369698_at;1368731_at;1368651_at,1387263_at;1368497_at;1367652_at		18.5654	22.8164	0.0158072	15.3495	18.2999	15.8813	11.8346	16.18	6.31202e-05	10.1787	11.8097	10.4045	1.87967e+06	49.6939	0.270322	6.66483e+06	2.81749e+06	8.03472e+06					35.1155;30.0616;19.5705;0.324767;0.0619393;6.06621;39.4681;32.0559;22.8164;29.9319;0.292383;0.254908;28.5593;28.4676;23.6793;0.0904144;2.461988;4.6979455;28.83;0.140946;0.0158072;36.5565;7.57916;47.8233;23.027;16.7895;36.5276	22.1522;20.2323;14.1871;0.0408567;0.0254314;0.185991;25.4163;21.2581;16.18;20.1643;0.0515247;0.0620163;19.4349;19.3855;16.6907;0.0374753;0.077203;2.6781043;20.5359;0.0512492;6.31202E-5;23.4439;0.120481;25.5109;16.181649999999998;12.3882;23.0409	79.2566;57.6531;30.9363;2.5E7;0.270322;16.8801;92.3515;64.2812;38.0215;57.2437;2.5E7;14.39;53.0563;52.7858;40.0585;0.594918;10.065059999999999;250023.52665;49.6939;13.316;500000.0;81.9429;21.1976;49.603;39.02565;25.4932;84.1046	24	6	22	297989;245920;266685;24297;170496;303538;89843;298693;360733;299269;192281;81750;286954;170913;294270;246074;24296;246097;25476;140668;24614;25303	1391463_at;1387969_at;1387955_at;1387243_at;1387011_at;1385276_a_at;1384816_at;1382314_at;1379285_at;1376845_at;1371152_a_at;1371037_at;1370698_at;1370464_at,1370465_at;1370382_at,1370383_s_at;1370355_at;1370269_at;1397221_s_at;1387027_a_at;1369698_at;1368731_at;1368497_at	15.8212	12.1843	15.6045	9.93367
GO:0009611	4	response to wounding	257	266	9	9	9	0.97816	0.050621	0.058328	3.38	680860;25419;24423;58819;316313;296654;24296;24536;25080	Eppk1;Crp;Gstm1;Txnrd1;Dst;Gsn;Cyp1a1;Lepr;Apoa4	1392012_at;1387830_at;1386985_at;1386958_at;1395274_at;1371414_at;1370269_at;1370604_at,1370605_s_at,1371223_a_at,1388232_a_at;1368520_at	316313(-0.1821);24536(-0.2274)	13.422	14.379	0.140946	12.3899	8.33675	10.0469	8.26376	5.4455	0.0512492	9.01629	4.15182	7.08434	3.54169e+06	34.7079	13.316	8.31413e+06	5.83042e+06	1.02238e+07					7.07448;20.2265;20.1987;21.6641;36.1342;0.530685;0.140946;14.379010000000001;0.44934	0.107778;14.599;14.5817;15.6676;23.7496;0.0822551;0.0512492;5.44549525;0.0892025	2.5E7;32.2998;32.2415;34.7079;77.396;21.0222;13.316;6375024.07585;500000.0	7	5	7	680860;25419;24423;58819;316313;24296;25080	1392012_at;1387830_at;1386985_at;1386958_at;1395274_at;1370269_at;1368520_at	15.1269	20.1987	13.1695	9.83516
GO:0009612	4	response to mechanical stimulus	253	262	7	7	7	0.90021	0.19178	0.24064	2.67	266766;245920;117514;60628;246097;116686;81707	Rcan1;Cxcl10;Txnip;Cxcr4;Fas;Gsr;Mmp14	1388686_at;1387969_at;1371131_a_at;1389244_x_at;1397221_s_at;1369061_at;1367860_a_at		13.6635	0.324769	0.0158072	17.0252	9.48104	14.5042	8.98798	0.0517397	6.31202e-05	11.276	6.32076	9.89717	1.07857e+07	500000	52.7858	1.32974e+07	1.5783e+07	1.30007e+07					0.324769;0.324767;28.4676;0.235955;0.0158072;28.7171;37.5583	0.0517397;0.0408567;19.3855;0.0107916;6.31202E-5;19.5196;23.9073	2.5E7;2.5E7;52.7858;2.5E7;500000.0;53.5243;86.4955	4	3	4	266766;245920;246097;116686	1388686_at;1387969_at;1397221_s_at;1369061_at	7.34561	0.324768	14.2484	4.90306
GO:0009615	5	response to virus	169	177	12	12	12	0.99998	8.2821e-05	8.2821e-05	6.78	308097;297989;245920;170496;303538;89843;298693;360733;299269;192281;24296;25476	Tagap;Ddx58;Cxcl10;Lcn2;Dhx58;Cxadr;Isg15;Rtp4;Ifi27l2b;Oas1a;Cyp1a1;Lgals9	1397958_at;1391463_at;1387969_at;1387011_at;1385276_a_at;1384816_at;1382314_at;1379285_at;1376845_at;1371152_a_at;1370269_at;1387027_a_at		20.4239	25.6879	0.140946	15.8532	16.5155	16.6759	13.5369	17.8074	0.0408567	10.3864	10.8647	10.96	4.16671e+06	60.7625	13.316	9.73122e+06	5.57276e+06	1.08676e+07	7.5	30.9939			35.1155;19.5705;0.324767;39.4681;32.0559;22.8164;29.9319;0.292383;0.254908;28.5593;0.140946;36.5565	22.1522;14.1871;0.0408567;25.4163;21.2581;16.18;20.1643;0.0515247;0.0620163;19.4349;0.0512492;23.4439	79.2566;30.9363;2.5E7;92.3515;64.2812;38.0215;57.2437;2.5E7;14.39;53.0563;13.316;81.9429	11	1	11	297989;245920;170496;303538;89843;298693;360733;299269;192281;24296;25476	1391463_at;1387969_at;1387011_at;1385276_a_at;1384816_at;1382314_at;1379285_at;1376845_at;1371152_a_at;1370269_at;1387027_a_at	19.0883	22.8164	15.9032	12.7537
GO:0009617	5	response to bacterium	172	193	5	5	5	0.86601	0.26559	0.40116	2.59	316010;170496;298693;294270;246074	Camp;Lcn2;Isg15;RT1-Db1;Scd1	1393603_at;1387011_at;1382314_at;1370382_at,1370383_s_at;1370355_at		26.5979	29.9319	4.69795	12.9744	27.1272	10.8654	17.8054	20.2323	2.6781	8.74172	18.5315	7.43458	50056.1	57.6531	49.6939	111785	35459.5	97440.5					30.0616;39.4681;29.9319;4.6979455;28.83	20.2323;25.4163;20.1643;2.6781043;20.5359	57.6531;92.3515;57.2437;250023.52665;49.6939	5	1	4	170496;298693;294270;246074	1387011_at;1382314_at;1370382_at,1370383_s_at;1370355_at	25.732	29.3809	14.8138	17.1987
GO:0009624	5	response to nematode	2	2	1	1	1	0.99968	0.035551	0.035551	50	24296	Cyp1a1	1370269_at		0.140946	0.140946	0.140946		0.140946		0.0512492	0.0512492	0.0512492		0.0512492		13.316	13.316	13.316		13.316		0	0.140946	0	0.140946	0.140946	0.0512492	13.316	1	0	1	24296	1370269_at	0.140946	0.140946		0.0512492
GO:0009628	3	response to abiotic stimulus	1163	1205	29	29	29	0.9594	0.062441	0.10871	2.41	689931;266766;245920;25419;24314;24539;58819;298884;291132;360481;309499;298652;363143;362835;58919;117514;291671;170913;24296;60628;246097;24536;116686;24651;25303;65155;81707;83619;24484	Mgarp;Rcan1;Cxcl10;Crp;Nqo1;Lpl;Txnrd1;Gen1;Gpld1;Dnaja3;Myof;Ube4b;Gnat1;Reep6;Ccnd1;Txnip;Hspa9;Abcb1a;Cyp1a1;Cxcr4;Fas;Lepr;Gsr;Pklr;Abcc2;Alas1;Mmp14;Nfe2l2;Igfbp3	1393627_at;1388686_at;1387969_at;1387830_at;1387599_a_at;1386965_at;1386958_at;1384102_at;1380833_at;1378392_at;1375857_at;1374507_at,1376862_at;1373587_at;1372841_at,1384639_at;1371150_at,1371643_at,1383075_at;1371131_a_at;1389930_at;1370464_at,1370465_at;1370269_at;1389244_x_at;1397221_s_at;1370604_at,1370605_s_at,1371223_a_at,1388232_a_at;1369061_at;1368651_at,1387263_at;1368497_at;1367982_at;…	24536(-0.2274)	17.625	16.7895	0.0158072	13.2012	14.7598	12.9972	11.3646	12.3882	2.85172e-09	9.07482	9.25187	8.97633	2.82331e+06	49.061	0.117549	7.75686e+06	5.1131e+06	9.94345e+06					14.6526;0.324769;0.324767;20.2265;8.72415;36.9287;21.6641;33.6809;9.29434;31.2133;27.1651;21.3806;34.1415;32.13295;15.557466666666665;28.4676;0.01714575;2.461988;0.140946;0.235955;0.0158072;14.379010000000001;28.7171;23.027;16.7895;6.83525;37.5583;8.54018;36.5276	11.1178;0.0517397;0.0408567;14.599;3.19261;23.617;15.6676;21.1562;4.33067;20.8292;18.6754;15.41795;22.2926;21.55585;11.556399999999998;19.3855;2.85172E-9;0.077203;0.0512492;0.0107916;6.31202E-5;5.44549525;19.5196;16.181649999999998;12.3882;3.02426;23.9073;2.44081;23.0409	21.0678;2.5E7;2.5E7;32.2998;22.2679;83.6043;34.7079;75.2628;24.0279;61.4029;49.061;34.380399999999995;71.9494;63.35945;23.282066666666665;52.7858;0.1175485;10.065059999999999;13.316;2.5E7;500000.0;6375024.07585;53.5243;39.02565;25.4932;16.0192;86.4955;23.1149;84.1046	22	16	19	689931;266766;245920;25419;24314;24539;58819;360481;298652;363143;362835;291671;170913;24296;246097;116686;25303;65155;83619	1393627_at;1388686_at;1387969_at;1387830_at;1387599_a_at;1386965_at;1386958_at;1378392_at;1374507_at,1376862_at;1373587_at;1372841_at,1384639_at;1389930_at;1370464_at,1370465_at;1370269_at;1397221_s_at;1369061_at;1368497_at;1367982_at;1367826_at	15.0122	14.6526	13.151	9.78335
GO:0009635	4	response to herbicide	23	23	4	4	4	0.99995	0.00068262	0.00068262	17.39	170496;300850;24296;65155	Lcn2;Gsta4;Cyp1a1;Alas1	1387011_at;1372297_at;1370269_at;1367982_at		17.2255	14.6465	0.140946	17.5304	12.1875	16.0578	11.1143	9.49483	0.0512492	11.7746	7.51043	10.8105	39.7204	26.6071	13.316	36.6758	30.5604	32.8247	0.5	3.4881	1.5	14.6465	39.4681;22.4578;0.140946;6.83525	25.4163;15.9654;0.0512492;3.02426	92.3515;37.195;13.316;16.0192	4	0	4	170496;300850;24296;65155	1387011_at;1372297_at;1370269_at;1367982_at	17.2255	14.6465	17.5304	11.1143
GO:0009636	4	response to toxic substance	519	553	29	29	29	1	2.0073e-07	2.0073e-07	5.24	266685;25419;25315;24314;170496;24423;311078;361659;300850;296654;58919;117514;286954;291671;170913;171352;24296;246097;63867;24536;25690;116686;25426;83500;24311;65155;29686;100912108;83619	Ugt2b17;Crp;Ephx1;Nqo1;Lcn2;Gstm1;Psmd14;Plekha1;Gsta4;Gsn;Ccnd1;Txnip;Ugt2b1;Hspa9;Abcb1a;Cyp3a9;Cyp1a1;Fas;Ugt2a1;Lepr;Ahr;Gsr;Cyp1b1;Slc22a8;Ddc;Alas1;Scn1b;Nupr1;Nfe2l2	1387955_at;1387830_at;1387669_a_at;1387599_a_at;1387011_at;1386985_at;1386073_at;1376762_at;1372297_at;1371414_at;1371150_at,1371643_at,1383075_at;1371131_a_at;1370698_at;1389930_at;1370464_at,1370465_at;1370387_at;1370269_at;1397221_s_at;1369850_at;1370604_at,1370605_s_at,1371223_a_at,1388232_a_at;1369146_a_at;1369061_at;1368990_at;1385005_at;1368064_a_at;1367982_at;1387010_s_at;1367847_at;13678…	24536(-0.2274)	14.8958	9.66871	0.0158072	13.7229	13.7744	12.9422	9.15002	3.19261	2.85172e-09	9.49503	8.50533	9.01423	1.11641e+06	32.2998	0.117549	4.7434e+06	2.25782e+06	6.86113e+06	26.5	39.3815			0.0619393;20.2265;8.09437;8.72415;39.4681;20.1987;39.2949;23.1615;22.4578;0.530685;15.557466666666665;28.4676;0.0904144;0.01714575;2.461988;25.9004;0.140946;0.0158072;5.4276;14.379010000000001;0.487373;28.7171;27.2489;39.8058;9.66871;6.83525;0.288393;35.7108;8.54018	0.0254314;14.599;2.7845;3.19261;25.4163;14.5817;25.1873;16.1835;15.9654;0.0822551;11.556399999999998;19.3855;0.0374753;2.85172E-9;0.077203;17.9697;0.0512492;6.31202E-5;2.0834;5.44549525;0.0641274;19.5196;18.7215;24.25;0.0550111;3.02426;0.057104;22.5936;2.44081	0.270322;32.2998;20.9633;22.2679;92.3515;32.2415;92.2647;39.6472;37.195;21.0222;23.282066666666665;52.7858;0.594918;0.1175485;10.065059999999999;45.6414;13.316;500000.0;14.844;6375024.07585;2.5E7;53.5243;49.2941;102.264;31.8289;16.0192;500000.0;80.9168;23.1149	22	13	21	266685;25419;25315;24314;170496;24423;311078;300850;286954;291671;170913;171352;24296;246097;63867;25690;116686;25426;24311;65155;83619	1387955_at;1387830_at;1387669_a_at;1387599_a_at;1387011_at;1386985_at;1386073_at;1372297_at;1370698_at;1389930_at;1370464_at,1370465_at;1370387_at;1370269_at;1397221_s_at;1369850_at;1369146_a_at;1369061_at;1368990_at;1368064_a_at;1367982_at;1367826_at	13.0513	8.54018	13.1809	7.89508
GO:0009642	6	response to light intensity	14	14	1	1	1	0.97471	0.22393	0.22393	7.14	363143	Gnat1	1373587_at		34.1415	34.1415	34.1415		34.1415		22.2926	22.2926	22.2926		22.2926		71.9494	71.9494	71.9494		71.9494		0	34.1415			34.1415	22.2926	71.9494	1	0	1	363143	1373587_at	34.1415	34.1415		22.2926
GO:0009651	5	response to salt stress	37	40	1	1	1	0.83919	0.51571	0.51571	2.5	170913	Abcb1a	1370464_at,1370465_at		2.46199	2.46199	2.46199		2.46199		0.077203	0.077203	0.077203		0.077203		10.0651	10.0651	10.0651		10.0651						2.46199	0.077203	10.0651	2	0	1	170913	1370464_at,1370465_at	2.46199	2.46199		0.077203
GO:0009653	3	anatomical structure morphogenesis	1225	1273	27	26	26	0.79573	0.27016	0.50319	2.04	406164;288985;116548;58819;308843;286896;316313;680102;309957;289264;287534;361659;29454;298652;94268;292949;25697;60628;60335;64558;25690;29200;25426;83472;81707;80881	Pbx2;Insig2;Pcsk5;Txnrd1;Tsku;Sgpl1;Dst;Mab21l2;Mef2a;Grem2;Fam101b;Plekha1;Gdf11;Ube4b;Efna1;Perp;Ctsl;Cxcr4;Tgm1;Fzd4;Ahr;Inhba;Cyp1b1;Ugdh;Mmp14;Serp1	1389432_at;1389377_at,1393690_at;1392773_at;1386958_at;1383315_at;1382843_at;1395274_at;1378988_at;1378360_at;1380799_at;1377940_at;1376762_at;1374706_at;1374507_at,1376862_at;1372844_at;1389177_at;1370244_at;1389244_x_at;1370051_at;1369468_at;1369146_a_at;1369012_at,1383486_at;1368990_at;1367938_at;1367860_a_at;1386900_at	116548(-0.2018);316313(-0.1821);29454(-0.1579);64558(0.3921)	21.0254	22.8062	0.0781713	13.6657	18.4321	13.3974	13.8249	16.0724	1.15429e-07	9.32021	12.2407	9.31487	3.86542e+06	51.3215	4.56418	9.1908e+06	6.15626e+06	1.09824e+07					11.7221;18.81295;24.5208;21.6641;7.08411;22.451;36.1342;4.67865;33.9069;41.7887;36.8972;23.1615;1.62109;21.3806;24.7896;31.4104;0.119104;0.235955;27.6837;0.0781713;0.487373;38.44015;27.2489;20.3319;37.5583;32.4532	8.8494;13.64725;17.1812;15.6676;0.0891169;15.9613;23.7496;0.157045;21.8155;26.3981;23.1572;16.1835;0.105802;15.41795;17.5606;20.9301;0.0377096;0.0107916;19.4656;1.15429E-7;0.0641274;24.11155;18.7215;14.7989;23.9073;21.4582	16.903;29.77735;42.1138;34.7079;28.1042;37.1795;77.396;500000.0;72.9728;105.191;86.0639;39.6472;2.5E7;34.380399999999995;41.8713;62.0658;4.56418;2.5E7;48.3628;2.5E7;2.5E7;53.34895;49.2941;32.0222;86.4955;65.6803	20	9	18	288985;116548;58819;308843;286896;316313;680102;289264;298652;94268;292949;25697;60335;64558;25690;25426;83472;80881	1389377_at,1393690_at;1392773_at;1386958_at;1383315_at;1382843_at;1395274_at;1378988_at;1380799_at;1374507_at,1376862_at;1372844_at;1389177_at;1370244_at;1370051_at;1369468_at;1369146_a_at;1368990_at;1367938_at;1386900_at	20.1732	22.0575	12.745	13.4059
GO:0009698	4	phenylpropanoid metabolic process	6	8	3	3	3	0.99999	0.00029836	0.00029836	37.5	24296;24894;24299	Cyp1a1;Cyp2a1;Cyp2a3	1370269_at;1387511_at;1369136_at		1.86222	0.732749	0.140946	2.4865	0.958127	1.65986	0.0883843	0.0943336	0.0512492	0.0345468	0.0813644	0.0295477	15.3749	14.7999	13.316	2.3986	15.9345	2.71178	0	0.140946	0	0.140946	0.140946;0.732749;4.71298	0.0512492;0.0943336;0.11957	13.316;18.0087;14.7999	3	0	3	24296;24894;24299	1370269_at;1387511_at;1369136_at	1.86222	0.732749	2.4865	0.0883843
GO:0009712	6	catechol-containing compound metabolic process	38	39	1	1	1	0.8455	0.50684	0.50684	2.56	24311	Ddc	1368064_a_at		9.66871	9.66871	9.66871		9.66871		0.0550111	0.0550111	0.0550111		0.0550111		31.8289	31.8289	31.8289		31.8289						9.66871	0.0550111	31.8289	1	0	1	24311	1368064_a_at	9.66871	9.66871		0.0550111
GO:0009713	7	catechol-containing compound biosynthetic process	22	22	1	1	1	0.94151	0.32867	0.32867	4.55	24311	Ddc	1368064_a_at		9.66871	9.66871	9.66871		9.66871		0.0550111	0.0550111	0.0550111		0.0550111		31.8289	31.8289	31.8289		31.8289						9.66871	0.0550111	31.8289	1	0	1	24311	1368064_a_at	9.66871	9.66871		0.0550111
GO:0009719	3	response to endogenous stimulus	1268	1339	46	46	46	1	1.0363e-05	1.552e-05	3.44	689931;316010;304608;288985;116548;266685;25419;25315;24314;24297;25642;291132;363285;494344;58919;81806;117514;286954;291671;170913;171352;294270;25697;24552;59295;246097;81613;24536;140668;116683;29516;25690;29200;25426;24614;24651;81813;25303;29487;29441;24311;65155;81707;83619;64045;24484	Mgarp;Camp;Mmp19;Insig2;Pcsk5;Ugt2b17;Crp;Ephx1;Nqo1;Cyp1a2;Cyp3a23/3a1;Gpld1;Scly;Ier2;Ccnd1;Serpina7;Txnip;Ugt2b1;Hspa9;Abcb1a;Cyp3a9;RT1-Db1;Ctsl;Me1;Nucb2;Fas;Ceacam1;Lepr;Abcc3;Efna5;Pde3b;Ahr;Inhba;Cyp1b1;Orm1;Pklr;Klf10;Abcc2;Gstt2;Por;Ddc;Alas1;Mmp14;Nfe2l2;Glrx;Igfbp3	1393627_at;1393603_at;1391095_at;1389377_at,1393690_at;1392773_at;1387955_at;1387830_at;1387669_a_at;1387599_a_at;1387243_at;1387118_at;1380833_at;1374524_at;1372389_at;1371150_at,1371643_at,1383075_at;1371143_at;1371131_a_at;1370698_at;1389930_at;1370464_at,1370465_at;1370387_at;1370382_at,1370383_s_at;1370244_at;1370067_at,1370870_at;1370000_at;1397221_s_at;1374620_at,1382975_at;1370604_at,1370…	116548(-0.2018);24536(-0.2274);116683(0.1685)	17.4441	16.2067	0.0158072	12.52	17.7266	12.401	10.9066	11.9723	2.85172e-09	8.75933	11.2176	8.57354	698403	34.3144	0.117549	3.78158e+06	1.50794e+06	5.67174e+06					14.6526;30.0616;29.5192;18.81295;24.5208;0.0619393;20.2265;8.09437;8.72415;6.06621;1.75171;9.29434;22.0766;7.3339;15.557466666666665;34.2065;28.4676;0.0904144;0.01714575;2.461988;25.9004;4.6979455;0.119104;17.77975;25.1917;0.0158072;30.432450000000003;14.379010000000001;7.57916;27.7022;27.3061;0.487373;38.44015;27.2489;47.8233;23.027;31.0897;16.7895;24.1682;15.499569999999999;9.66871;6.83525;37.5…	11.1178;20.2323;20.2773;13.64725;17.1812;0.0254314;14.599;2.7845;3.19261;0.185991;0.0435876;4.33067;15.7357;3.92869;11.556399999999998;22.0522;19.3855;0.0374753;2.85172E-9;0.077203;17.9697;2.6781043;0.0377096;13.021999999999998;17.8142;6.31202E-5;20.409799999999997;5.44549525;0.120481;18.5771;19.0667;0.0641274;24.11155;18.7215;25.5109;16.181649999999998;20.7657;12.3882;17.1827;9.02697;0.0550111;3…	21.0678;57.6531;54.4716;29.77735;42.1138;0.270322;32.2998;20.9633;22.2679;16.8801;14.034;24.0279;36.3291;16.7655;23.282066666666665;73.6665;52.7858;0.594918;0.1175485;10.065059999999999;45.6414;250023.52665;4.56418;27.471249999999998;42.7872;500000.0;59.101;6375024.07585;21.1976;52.381;48.0975;2.5E7;53.34895;49.2941;49.603;39.02565;60.9906;25.4932;40.4119;30.4732;31.8289;16.0192;86.4955;23.1149;2…	40	20	33	689931;304608;288985;116548;266685;25419;25315;24314;24297;25642;363285;286954;291671;170913;171352;294270;25697;24552;59295;246097;81613;140668;29516;25690;25426;24614;25303;29487;29441;24311;65155;83619;64045	1393627_at;1391095_at;1389377_at,1393690_at;1392773_at;1387955_at;1387830_at;1387669_a_at;1387599_a_at;1387243_at;1387118_at;1374524_at;1370698_at;1389930_at;1370464_at,1370465_at;1370387_at;1370382_at,1370383_s_at;1370244_at;1370067_at,1370870_at;1370000_at;1397221_s_at;1374620_at,1382975_at;1369698_at;1369157_at;1369146_a_at;1368990_at;1368731_at;1368497_at;1368409_at;1368213_at,1387109_at;1368…	14.2056	14.6526	11.7688	8.73301
GO:0009725	4	response to hormone	949	1002	42	42	42	1	1.6708e-07	1.733e-07	4.19	689931;304608;288985;116548;266685;25419;25315;24314;24297;25642;291132;363285;58919;81806;117514;286954;291671;170913;171352;294270;25697;24552;59295;246097;81613;24536;140668;116683;29516;25690;29200;25426;24614;24651;25303;29487;29441;65155;81707;83619;64045;24484	Mgarp;Mmp19;Insig2;Pcsk5;Ugt2b17;Crp;Ephx1;Nqo1;Cyp1a2;Cyp3a23/3a1;Gpld1;Scly;Ccnd1;Serpina7;Txnip;Ugt2b1;Hspa9;Abcb1a;Cyp3a9;RT1-Db1;Ctsl;Me1;Nucb2;Fas;Ceacam1;Lepr;Abcc3;Efna5;Pde3b;Ahr;Inhba;Cyp1b1;Orm1;Pklr;Abcc2;Gstt2;Por;Alas1;Mmp14;Nfe2l2;Glrx;Igfbp3	1393627_at;1391095_at;1389377_at,1393690_at;1392773_at;1387955_at;1387830_at;1387669_a_at;1387599_a_at;1387243_at;1387118_at;1380833_at;1374524_at;1371150_at,1371643_at,1383075_at;1371143_at;1371131_a_at;1370698_at;1389930_at;1370464_at,1370465_at;1370387_at;1370382_at,1370383_s_at;1370244_at;1370067_at,1370870_at;1370000_at;1397221_s_at;1374620_at,1382975_at;1370604_at,1370605_s_at,1371223_a_at,…	116548(-0.2018);24536(-0.2274);116683(0.1685)	17.2447	16.2067	0.0158072	12.6336	17.4146	12.4725	10.8744	11.9723	2.85172e-09	8.6982	11.0365	8.53907	764913	34.3144	0.117549	3.95517e+06	1.68007e+06	5.96829e+06					14.6526;29.5192;18.81295;24.5208;0.0619393;20.2265;8.09437;8.72415;6.06621;1.75171;9.29434;22.0766;15.557466666666665;34.2065;28.4676;0.0904144;0.01714575;2.461988;25.9004;4.6979455;0.119104;17.77975;25.1917;0.0158072;30.432450000000003;14.379010000000001;7.57916;27.7022;27.3061;0.487373;38.44015;27.2489;47.8233;23.027;16.7895;24.1682;15.499569999999999;6.83525;37.5583;8.54018;15.623975;36.5276	11.1178;20.2773;13.64725;17.1812;0.0254314;14.599;2.7845;3.19261;0.185991;0.0435876;4.33067;15.7357;11.556399999999998;22.0522;19.3855;0.0374753;2.85172E-9;0.077203;17.9697;2.6781043;0.0377096;13.021999999999998;17.8142;6.31202E-5;20.409799999999997;5.44549525;0.120481;18.5771;19.0667;0.0641274;24.11155;18.7215;25.5109;16.181649999999998;12.3882;17.1827;9.02697;3.02426;23.9073;2.44081;9.751014999…	21.0678;54.4716;29.77735;42.1138;0.270322;32.2998;20.9633;22.2679;16.8801;14.034;24.0279;36.3291;23.282066666666665;73.6665;52.7858;0.594918;0.1175485;10.065059999999999;45.6414;250023.52665;4.56418;27.471249999999998;42.7872;500000.0;59.101;6375024.07585;21.1976;52.381;48.0975;2.5E7;53.34895;49.2941;49.603;39.02565;25.4932;40.4119;30.4732;16.0192;86.4955;23.1149;29.54275;84.1046	39	17	32	689931;304608;288985;116548;266685;25419;25315;24314;24297;25642;363285;286954;291671;170913;171352;294270;25697;24552;59295;246097;81613;140668;29516;25690;25426;24614;25303;29487;29441;65155;83619;64045	1393627_at;1391095_at;1389377_at,1393690_at;1392773_at;1387955_at;1387830_at;1387669_a_at;1387599_a_at;1387243_at;1387118_at;1374524_at;1370698_at;1389930_at;1370464_at,1370465_at;1370387_at;1370382_at,1370383_s_at;1370244_at;1370067_at,1370870_at;1370000_at;1397221_s_at;1374620_at,1382975_at;1369698_at;1369157_at;1369146_a_at;1368990_at;1368731_at;1368497_at;1368409_at;1368213_at,1387109_at;1367…	14.3474	15.0761	11.9284	9.0042
GO:0009743	5	response to carbohydrate	239	246	9	9	9	0.98662	0.03346	0.044612	3.66	25627;291132;309957;117514;25697;59295;246097;24651;64045	Cma1;Gpld1;Mef2a;Txnip;Ctsl;Nucb2;Fas;Pklr;Glrx	1387173_at;1380833_at;1378360_at;1371131_a_at;1370244_at;1370000_at;1397221_s_at;1368651_at,1387263_at;1367705_at,1386908_at		15.0737	15.624	0.0158072	13.2783	18.4018	12.0721	9.92403	9.75101	2.85172e-09	9.0717	12.1464	8.60216	55585.1	39.0256	0.117549	166656	21771.9	108135					0.01714575;9.29434;33.9069;28.4676;0.119104;25.1917;0.0158072;23.027;15.623975	2.85172E-9;4.33067;21.8155;19.3855;0.0377096;17.8142;6.31202E-5;16.181649999999998;9.751014999999999	0.1175485;24.0279;72.9728;52.7858;4.56418;42.7872;500000.0;39.02565;29.54275	5	6	4	25697;59295;246097;64045	1370244_at;1370000_at;1397221_s_at;1367705_at,1386908_at	10.2376	7.87154	12.3761	6.90075
GO:0009746	7	response to hexose	196	202	9	9	9	0.99648	0.010704	0.010704	4.46	25627;291132;309957;117514;25697;59295;246097;24651;64045	Cma1;Gpld1;Mef2a;Txnip;Ctsl;Nucb2;Fas;Pklr;Glrx	1387173_at;1380833_at;1378360_at;1371131_a_at;1370244_at;1370000_at;1397221_s_at;1368651_at,1387263_at;1367705_at,1386908_at		15.0737	15.624	0.0158072	13.2783	18.4018	12.0721	9.92403	9.75101	2.85172e-09	9.0717	12.1464	8.60216	55585.1	39.0256	0.117549	166656	21771.9	108135					0.01714575;9.29434;33.9069;28.4676;0.119104;25.1917;0.0158072;23.027;15.623975	2.85172E-9;4.33067;21.8155;19.3855;0.0377096;17.8142;6.31202E-5;16.181649999999998;9.751014999999999	0.1175485;24.0279;72.9728;52.7858;4.56418;42.7872;500000.0;39.02565;29.54275	5	6	4	25697;59295;246097;64045	1370244_at;1370000_at;1397221_s_at;1367705_at,1386908_at	10.2376	7.87154	12.3761	6.90075
GO:0009749	8	response to glucose	188	194	9	9	9	0.99737	0.0083413	0.0083413	4.64	25627;291132;309957;117514;25697;59295;246097;24651;64045	Cma1;Gpld1;Mef2a;Txnip;Ctsl;Nucb2;Fas;Pklr;Glrx	1387173_at;1380833_at;1378360_at;1371131_a_at;1370244_at;1370000_at;1397221_s_at;1368651_at,1387263_at;1367705_at,1386908_at		15.0737	15.624	0.0158072	13.2783	18.4018	12.0721	9.92403	9.75101	2.85172e-09	9.0717	12.1464	8.60216	55585.1	39.0256	0.117549	166656	21771.9	108135					0.01714575;9.29434;33.9069;28.4676;0.119104;25.1917;0.0158072;23.027;15.623975	2.85172E-9;4.33067;21.8155;19.3855;0.0377096;17.8142;6.31202E-5;16.181649999999998;9.751014999999999	0.1175485;24.0279;72.9728;52.7858;4.56418;42.7872;500000.0;39.02565;29.54275	5	6	4	25697;59295;246097;64045	1370244_at;1370000_at;1397221_s_at;1367705_at,1386908_at	10.2376	7.87154	12.3761	6.90075
GO:0009751	5	response to salicylic acid	3	3	1	1	1	0.99905	0.052852	0.052852	33.33	29487	Gstt2	1368409_at		24.1682	24.1682	24.1682		24.1682		17.1827	17.1827	17.1827		17.1827		40.4119	40.4119	40.4119		40.4119		0	24.1682	0	24.1682	24.1682	17.1827	40.4119	1	0	1	29487	1368409_at	24.1682	24.1682		17.1827
GO:0009755	5	hormone-mediated signaling pathway	125	129	1	1	1	0.32346	0.90431	0.73221	0.78	24684	Prlr	1369493_at,1370384_a_at,1370789_a_at		25.4634	25.4634	25.4634		25.4634		17.2159	17.2159	17.2159		17.2159		46.799	46.799	46.799		46.799						25.4634	17.2159	46.799	0	3	0
GO:0009790	4	embryo development	256	270	1	1	1	0.043231	0.99284	0.097872	0.37	246097	Fas	1397221_s_at		0.0158072	0.0158072	0.0158072		0.0158072		6.31202e-05	6.31202e-05	6.31202e-05		6.31202e-05		500000	500000	500000		500000						0.0158072	6.31202e-05	500000	1	0	1	246097	1397221_s_at	0.0158072	0.0158072		6.31202e-05
GO:0009791	3	post-embryonic development	94	99	5	5	5	0.99125	0.032668	0.032668	5.05	24297;286896;361659;81806;80881	Cyp1a2;Sgpl1;Plekha1;Serpina7;Serp1	1387243_at;1382843_at;1376762_at;1371143_at;1386900_at		23.6677	23.1615	6.06621	11.1781	26.9045	9.72693	15.1682	16.1835	0.185991	8.84703	17.4972	7.3104	46.6107	39.6472	16.8801	23.0055	53.8864	21.8323	3.5	33.3299			6.06621;22.451;23.1615;34.2065;32.4532	0.185991;15.9613;16.1835;22.0522;21.4582	16.8801;37.1795;39.6472;73.6665;65.6803	3	2	3	24297;286896;80881	1387243_at;1382843_at;1386900_at	20.3235	22.451	13.3215	12.5352
GO:0009792	5	embryo development ending in birth or egg hatching	256	270	1	1	1	0.043231	0.99284	0.097872	0.37	246097	Fas	1397221_s_at		0.0158072	0.0158072	0.0158072		0.0158072		6.31202e-05	6.31202e-05	6.31202e-05		6.31202e-05		500000	500000	500000		500000						0.0158072	6.31202e-05	500000	1	0	1	246097	1397221_s_at	0.0158072	0.0158072		6.31202e-05
GO:0009799	4	specification of symmetry	64	64	1	1	1	0.68094	0.6869	1	1.56	116548	Pcsk5	1392773_at	116548(-0.2018)	24.5208	24.5208	24.5208		24.5208		17.1812	17.1812	17.1812		17.1812		42.1138	42.1138	42.1138		42.1138						24.5208	17.1812	42.1138	1	0	1	116548	1392773_at	24.5208	24.5208		17.1812
GO:0009804	5	coumarin metabolic process	6	8	3	3	3	0.99999	0.00029836	0.00029836	37.5	24296;24894;24299	Cyp1a1;Cyp2a1;Cyp2a3	1370269_at;1387511_at;1369136_at		1.86222	0.732749	0.140946	2.4865	0.958127	1.65986	0.0883843	0.0943336	0.0512492	0.0345468	0.0813644	0.0295477	15.3749	14.7999	13.316	2.3986	15.9345	2.71178	0	0.140946	0	0.140946	0.140946;0.732749;4.71298	0.0512492;0.0943336;0.11957	13.316;18.0087;14.7999	3	0	3	24296;24894;24299	1370269_at;1387511_at;1369136_at	1.86222	0.732749	2.4865	0.0883843
GO:0009812	4	flavonoid metabolic process	6	14	3	3	3	0.99991	0.0017908	0.0017908	21.43	64305;24296;29441	Sult1b1;Cyp1a1;Por	1387314_at;1370269_at;1368213_at,1387109_at		16.792	15.4996	0.140946	17.3334	18.1391	17.7751	10.5528	9.02697	0.0512492	11.3418	11.4663	11.6578	39.3591	30.4732	13.316	31.4423	42.0827	32.4581	0	0.140946	0.5	7.82026	34.7354;0.140946;15.499569999999999	22.5803;0.0512492;9.02697	74.2881;13.316;30.4732	4	0	3	64305;24296;29441	1387314_at;1370269_at;1368213_at,1387109_at	16.792	15.4996	17.3334	10.5528
GO:0009820	5	alkaloid metabolic process	6	6	3	3	3	1	0.00010944	0.00010944	50	24297;171352;24311	Cyp1a2;Cyp3a9;Ddc	1387243_at;1370387_at;1368064_a_at		13.8784	9.66871	6.06621	10.566	11.6429	9.60484	6.07023	0.185991	0.0550111	10.3054	4.15109	9.12535	31.4501	31.8289	16.8801	14.3844	27.9615	14.0889	0	6.06621	0	6.06621	6.06621;25.9004;9.66871	0.185991;17.9697;0.0550111	16.8801;45.6414;31.8289	3	0	3	24297;171352;24311	1387243_at;1370387_at;1368064_a_at	13.8784	9.66871	10.566	6.07023
GO:0009822	6	alkaloid catabolic process	2	2	1	1	1	0.99968	0.035551	0.035551	50	171352	Cyp3a9	1370387_at		25.9004	25.9004	25.9004		25.9004		17.9697	17.9697	17.9697		17.9697		45.6414	45.6414	45.6414		45.6414		0	25.9004	0	25.9004	25.9004	17.9697	45.6414	1	0	1	171352	1370387_at	25.9004	25.9004		17.9697
GO:0009855	5	determination of bilateral symmetry	63	63	1	1	1	0.68755	0.68115	1	1.59	116548	Pcsk5	1392773_at	116548(-0.2018)	24.5208	24.5208	24.5208		24.5208		17.1812	17.1812	17.1812		17.1812		42.1138	42.1138	42.1138		42.1138						24.5208	17.1812	42.1138	1	0	1	116548	1392773_at	24.5208	24.5208		17.1812
GO:0009887	4	animal organ morphogenesis	440	452	10	10	10	0.81045	0.29359	0.46785	2.21	286896;287534;361659;29454;292949;60335;25690;29200;81707;80881	Sgpl1;Fam101b;Plekha1;Gdf11;Perp;Tgm1;Ahr;Inhba;Mmp14;Serp1	1382843_at;1377940_at;1376762_at;1374706_at;1389177_at;1370051_at;1369146_a_at;1369012_at,1383486_at;1367860_a_at;1386900_at	29454(-0.1579)	25.2164	29.547	0.487373	13.9068	17.3272	15.2026	16.5345	20.1978	0.0641274	9.12513	11.3864	10.3999	5.00005e+06	63.873	37.1795	1.05409e+07	1.05558e+07	1.30158e+07					22.451;36.8972;23.1615;1.62109;31.4104;27.6837;0.487373;38.44015;37.5583;32.4532	15.9613;23.1572;16.1835;0.105802;20.9301;19.4656;0.0641274;24.11155;23.9073;21.4582	37.1795;86.0639;39.6472;2.5E7;62.0658;48.3628;2.5E7;53.34895;86.4955;65.6803	5	6	5	286896;292949;60335;25690;80881	1382843_at;1389177_at;1370051_at;1369146_a_at;1386900_at	22.8971	27.6837	13.1254	15.5759
GO:0009888	4	tissue development	551	566	10	10	10	0.56354	0.5654	1	1.77	266766;29454;296654;494500;25697;81613;24684;25690;25426;81813	Rcan1;Gdf11;Gsn;Gsta3;Ctsl;Ceacam1;Prlr;Ahr;Cyp1b1;Klf10	1388686_at;1374706_at;1371414_at;1371089_at;1370244_at;1374620_at,1382975_at;1369493_at,1370384_a_at,1370789_a_at;1369146_a_at;1368990_at;1368650_at	29454(-0.1579)	14.1964	13.1336	0.119104	14.4489	11.2635	14.3364	9.47083	8.66087	0.0377096	9.97446	7.37717	9.89107	7.50003e+06	54.1975	4.56418	1.20761e+07	1.08329e+07	1.30584e+07					0.324769;1.62109;0.530685;24.6462;0.119104;30.432450000000003;25.46343333333333;0.487373;27.2489;31.0897	0.0517397;0.105802;0.0822551;17.2537;0.0377096;20.409799999999997;17.215933333333336;0.0641274;18.7215;20.7657	2.5E7;2.5E7;21.0222;42.4262;4.56418;59.101;46.798966666666665;2.5E7;49.2941;60.9906	7	6	6	266766;494500;25697;81613;25690;25426	1388686_at;1371089_at;1370244_at;1374620_at,1382975_at;1369146_a_at;1368990_at	13.8765	12.5668	14.9739	9.4231
GO:0009889	5	regulation of biosynthetic process	2869	3047	43	42	42	0.026105	0.98247	0.050158	1.38	685691;297989;307395;406164;288985;299857;25419;171400;288444;297783;363017;60336;301431;311021;679692;291132;360481;309957;305888;289264;363465;289185;94268;314312;494344;58919;117514;29199;294270;25357;81613;24536;25476;64558;25690;29200;25426;81813;25080;29441;83619;80881	Eid2;Ddx58;Ablim3;Pbx2;Insig2;Shmt2;Crp;Elovl5;Hsph1;Mybl1;Taf1d;Arpp19;Nif3l1;Nmi;Lpgat1;Gpld1;Dnaja3;Mef2a;Zfhx2;Grem2;Pir;Creg1;Efna1;Entpd5;Ier2;Ccnd1;Txnip;Hfe;RT1-Db1;Thrsp;Ceacam1;Lepr;Lgals9;Fzd4;Ahr;Inhba;Cyp1b1;Klf10;Apoa4;Por;Nfe2l2;Serp1	1393058_at;1391463_at;1390255_at;1389432_at;1389377_at,1393690_at;1388695_at;1387830_at;1387630_at;1385620_at,1388898_at;1385132_at;1385109_at;1394318_at;1383289_at;1381875_at;1397880_at;1380833_at;1378392_at;1378360_at;1390368_at;1380799_at;1377662_at;1375428_at;1372844_at;1372774_at,1382434_at,1382544_at;1372389_at;1371150_at,1371643_at,1383075_at;1371131_a_at;1370772_a_at;1370382_at,1370383_s_…	363017(-0.3027);301431(0.199);305888(-0.1592);289185(0.2709);24536(-0.2274);64558(0.3921)	20.5519	20.1642	0.056018	13.1748	11.4234		13.2969	14.3542	1.15429e-07	9.1184	0.0790355		2.56254e+06	53.0674	14.6268	7.43329e+06	495063						25.2334;19.5705;0.269704;11.7221;18.81295;7.86658;20.2265;35.3004;25.281950000000002;30.3994;48.7874;27.3981;16.051;0.230619;20.1019;9.29434;31.2133;33.9069;0.056018;41.7887;17.8188;11.4377;24.7896;21.006220000000003;7.3339;15.557466666666665;28.4676;35.2166;4.6979455;37.6874;30.432450000000003;14.379010000000001;36.5565;0.0781713;0.487373;38.44015;27.2489;31.0897;0.44934;15.499569999999999;8.540…	17.5909;14.1871;0.064511;8.8494;13.64725;2.76025;14.599;22.8512;17.9119;20.4086;31.8194;19.1059;11.8964;0.0445238;14.5212;4.33067;20.8292;21.8155;2.77822E-7;26.3981;13.0639;0.102643;17.5606;12.870903333333333;3.92869;11.556399999999998;19.3855;22.8112;2.6781043;24.9041;20.409799999999997;5.44549525;23.4439;1.15429E-7;0.0641274;24.11155;18.7215;20.7657;0.0892025;9.02697;2.44081;21.4582	43.9106;30.9363;14.6268;16.903;29.77735;20.2174;32.2998;76.5826;42.88935;58.7317;58.59;48.4149;24.132;2.5E7;32.0384;24.0279;61.4029;72.9728;2.5E7;105.191;27.4474;500000.0;41.8713;41.02843333333333;16.7655;23.282066666666665;52.7858;76.2381;250023.52665;81.9872;59.101;6375024.07585;81.9429;2.5E7;2.5E7;53.34895;49.2941;60.9906;500000.0;30.4732;23.1149;65.6803	37	18	30	685691;297989;288985;299857;25419;171400;288444;297783;60336;301431;311021;679692;360481;289264;363465;289185;94268;314312;29199;294270;25357;81613;25476;64558;25690;25426;25080;29441;83619;80881	1393058_at;1391463_at;1389377_at,1393690_at;1388695_at;1387830_at;1387630_at;1385620_at,1388898_at;1385132_at;1394318_at;1383289_at;1381875_at;1397880_at;1378392_at;1380799_at;1377662_at;1375428_at;1372844_at;1372774_at,1382434_at,1382544_at;1370772_a_at;1370382_at,1370383_s_at;1371400_at;1374620_at,1382975_at;1387027_a_at;1369468_at;1369146_a_at;1368990_at;1368520_at;1368213_at,1387109_at;136782…	20.7958	20.6164	12.2779	13.5466
[truncated: 3,041 more rows]
[truncated: 46 more columns]
